# Supplementary material
Source: PubMed Central journal article supplement (PMC2862728)
Supplement: NIHMS190048-supplement-Supp1.pdf [file NIHMS190048-supplement-Supp1.pdf]

## ONLINE SUPPLEMENTAL MATERIALS

### **Renal medullary microRNAs in Dahl salt-sensitive rats: miR-29b regulates several collagens and related genes**

Yong Liu<sup>1</sup>, Norman E. Taylor<sup>1</sup>, Limin Lu<sup>1,2</sup>, Kristie Usa<sup>1</sup>, Allen W. Cowley, Jr.<sup>1</sup>, Nicholas R. Ferreri<sup>3</sup>, Nan Cher Yeo<sup>1</sup>, and Mingyu Liang<sup>1</sup>

<sup>1</sup>Department of Physiology, Medical College of Wisconsin, Milwaukee, Wisconsin 53226;

<sup>2</sup>Department of Physiology and Pathophysiology, Fudan University Shanghai Medical College,

Shanghai, P.R. China; <sup>3</sup>Department of Pharmacology, New York Medical College, Valhalla,

New York 10595

Correspondance:

Mingyu Liang, M.B., Ph.D.

Tel: 414 456-8539

Fax: 414 456-6546

Email: [mliang@mcw.edu](mailto:mliang@mcw.edu)

**Supplemental Table S1. Primer sequences, amplicon locations, and seed region locations for 3'-UTR constructs.**

| name                 | primer sequence                        | amplicon location (bases from stop codon)  | amplicon size (bp) | restriction enzyme site for insertion | target site location based on TargetScan                  |
|----------------------|----------------------------------------|--------------------------------------------|--------------------|---------------------------------------|-----------------------------------------------------------|
| <i>col1a1-UTR-s</i>  | atata actagt ccccaagacacaggaataatg     | 418 to 1102                                | 685                | <i>Spe I</i>                          | 863-869, 905-912, 1023-1029                               |
| <i>col1a1-UTR-a</i>  | atcga aagctt aggagctggaagatgaagagg     |                                            |                    | <i>Hind III</i>                       |                                                           |
| <i>col3a1-UTR-s</i>  | atata actagt caaccagtgaagtgacca        | 68 to 264                                  | 197                | <i>Spe I</i>                          | 235-242                                                   |
| <i>col3a1-UTR-a</i>  | ttcga aagctt aagtgtgatgtttattattat     |                                            |                    | <i>Hind III</i>                       |                                                           |
| <i>col4a1-UTR-s</i>  | acaga actagt gcccaagtgtcatgagaagaa     | minus 26 to 540                            | 567                | <i>Spe I</i>                          | 30-37, 333-339                                            |
| <i>col4a1-UTR-a</i>  | ttcga aagctt cagggcgtaagtttggtttg      |                                            |                    | <i>Hind III</i>                       |                                                           |
| <i>col5a1-UTR-s</i>  | gacga actagt agaggctgatgggatgggtgc     | 928 to 1816                                | 889                | <i>Spe I</i>                          | 1005-1011, 1035-1042, 1327-1334, 1716-1722                |
| <i>col5a1-UTR-a</i>  | ttatg aagctt ggtacttgggggatcctgttggtg  |                                            |                    | <i>Hind III</i>                       |                                                           |
| <i>col5a2-UTR-s</i>  | gtatt actagt tcttacaagttgggatggatttc   | 918 to 1321                                | 404                | <i>Spe I</i>                          | 1041-1048                                                 |
| <i>col5a2-UTR-a</i>  | tttac aagctt cttgggatggcctgggttatt     |                                            |                    | <i>Hind III</i>                       |                                                           |
| <i>col5a3-UTR-s</i>  | atata actagt gctcttctgtgggcttctgc      | minus 107 to 634                           | 742                | <i>Spe I</i>                          | 49-55, 330-337, 582-588                                   |
| <i>col5a3-UTR-a</i>  | atata aagctt aaccattcattccccatttcatac  |                                            |                    | <i>Hind III</i>                       |                                                           |
| <i>col7a1-UTR-s</i>  | ttata actagt gccgggtcctgctatcctccatt   | 53 to 512                                  | 460                | <i>Spe I</i>                          | 76-83, 286-292                                            |
| <i>col7a1-UTR-a</i>  | tccgt aagctt agtccctaccctatttcttttga   |                                            |                    | <i>Hind III</i>                       |                                                           |
| <i>col8a1-UTR-s</i>  | atatt actagt gatttctaccagcttccac       | 453 and 212 (up and down from seed region) | 673                | <i>Spe I</i>                          | one target site not predicted by TargetScan (see Results) |
| <i>col8a1-UTR-a</i>  | ttata gagctc cagtttggtccatttcacat      |                                            |                    | <i>Sac I-HF</i>                       |                                                           |
| <i>col12a1-UTR-s</i> | taata actagt gcagaatacaggatgactacg     | minus 99 to 723                            | 823                | <i>Spe I</i>                          |                                                           |
| <i>col12a1-UTR-a</i> | taata gagctc taaaataaaagcagcgactct     |                                            |                    | <i>Sac I-HF</i>                       |                                                           |
| <i>Mmp2-UTR-s</i>    | cgcta actagt gaggggtgcttctttgt         | 138 to 679                                 | 542                | <i>Spe I</i>                          | 263-269                                                   |
| <i>Mmp2-UTR-a</i>    | tacta aagctt gtttccacgccactgactt       |                                            |                    | <i>Hind III</i>                       |                                                           |
| <i>Itgb1-UTR-s</i>   | ttata gag ctacagcagcagcatcttagtcaca    | 30 to 862                                  | 833                | <i>Sac I-HF</i>                       | 298-304, 772-778                                          |
| <i>Itgb1-UTR-a</i>   | ttgac acgc gtacagccacagaaaagaaaaggttat |                                            |                    | <i>Mlu I</i>                          |                                                           |

**Supplemental Table S2. Primer sequences for real-time PCR.**

| <b>Gene</b>    | <b>forward primer 5'-3'</b> | <b>reverse primer 5'-3'</b> |
|----------------|-----------------------------|-----------------------------|
| <i>col1a1</i>  | ggacatggggttctcggacta       | gcacaggccctcaaaaacaa        |
| <i>col1a2</i>  | ctggatttgctggcgagaag        | aataccgggagcaccaagaag       |
| <i>col3a1</i>  | atgtacagctggcctcctca        | tgttttgcagtggtatgtaatgttc   |
| <i>col4a1</i>  | tcctgcttccgctctgc           | gaaaggccttggtgtcact         |
| <i>col4a2</i>  | ggctcagcttctcagcttg         | ggtgggagcaggtgtcagtg        |
| <i>col5a1</i>  | ccaacgatgaggaaatgtcttatg    | ctggtagcctttcttggtagcac     |
| <i>col5a2</i>  | agcaaatcccctgacaataagc      | ataaaaggcgagaaagggtcat      |
| <i>col5a3</i>  | gaccttccctctcattcctattct    | tcccacgtgatcttgtttacct      |
| <i>col6a1</i>  | gatccctgcccttggtttgt        | ctgcagggatggtgtgaagac       |
| <i>col6a2</i>  | gtgggtggatgggacaaatg        | caaataaccacacggaaatagact    |
| <i>col6a3</i>  | gggttctgctcagggacaagt       | caggcagatggtagtttcagg       |
| <i>col7a1</i>  | aaaggagaagctgactgactgag     | gtgatccggacgcaataaactg      |
| <i>col8a1</i>  | agacagaactacaaccgcagac      | gcagtgaacatggtagcaaagtag    |
| <i>col12a1</i> | tacaacgggcaaggctatcc        | ctcgcggtcaggcaggta          |
| <i>col15a1</i> | tccctcccctcgcagtg           | agggttgaaggaaggaatgac       |
| <i>col16a1</i> | cagggttgccaggaatgag         | ctgcaatgccaacaccaatg        |
| <i>Mmp2</i>    | acagggcagtggtgatacaggt      | aaacagcaaagggcaacaaag       |
| <i>Itgb1</i>   | atcctattacaagagtgccgtgac    | cccaaagctaccctactgtgactaa   |

**Supplemental Table S3. Signal intensity data from 16 microRNA microarrays.**

Original data is shown prior to any processing or normalization.

Assembled per journal requests. Please contact the author for the data in an analyzable format.

| row_block | column_block | row_block_spot | column_block_spot | probe name_Ambion | probe name_rat | SS 4% NaCl medulla - 1 |            |               |                   |          | SS 4% NaCl medulla - 2 |            |               |                   |          | SS 4% NaCl medulla - 3 |            |               |                   |          | SS 4% NaCl medulla - 4 |            |               |                   |          | SS-13BN 4% NaCl medulla - 1 |            |               |                   |          |
|-----------|--------------|----------------|-------------------|-------------------|----------------|------------------------|------------|---------------|-------------------|----------|------------------------|------------|---------------|-------------------|----------|------------------------|------------|---------------|-------------------|----------|------------------------|------------|---------------|-------------------|----------|-----------------------------|------------|---------------|-------------------|----------|
|           |              |                |                   |                   |                | signal                 | background | signal Slides | Background Slides | Diameter | signal                 | background | signal Slides | Background Slides | Diameter | signal                 | background | signal Slides | Background Slides | Diameter | signal                 | background | signal Slides | Background Slides | Diameter | signal                      | background | signal Slides | Background Slides | Diameter |
| 1         | 1            | 1              | 1                 | Control_1         |                | 7791                   | 1229       | 6130          | 1796              | 212      | 10189                  | 1587       | 7864          | 2358              | 205      | 11763                  | 865        | 9820          | 1341              | 211      | 13042                  | 763        | 10101         | 1125              | 205      | 9262                        | 1018       | 6788          | 1390              |          |
| 1         | 1            | 1              | 2                 | Control_3         |                | 4400                   | 1564       | 3845          | 2090              | 209      | 13238                  | 561        | 17405         | 1235              | 212      | 14566                  | 971        | 18133         | 1418              | 211      | 17222                  | 1989       | 15146         | 6293              | 208      | 4941                        | 2907       | 6046          | 8803              |          |
| 1         | 1            | 1              | 3                 | hsa_let_7a        | mo-let-7a      | 21093                  | 2102       | 18794         | 2871              | 207      | 27579                  | 3720       | 21922         | 12184             | 209      | 35409                  | 2524       | 24717         | 6465              | 212      | 30532                  | 1049       | 17433         | 1574              | 213      | 21079                       | 1769       | 17705         | 2939              |          |
| 1         | 1            | 1              | 4                 | hsa_let_7c        | mo-let-7c      | 24114                  | 1636       | 19358         | 2775              | 207      | 33366                  | 788        | 23058         | 994               | 209      | 35833                  | 1199       | 22708         | 1731              | 208      | 41944                  | 877        | 21771         | 1506              | 213      | 25352                       | 1297       | 18901         | 2193              |          |
| 1         | 1            | 1              | 5                 | hsa_let_7e        | mo-let-7e      | 9247                   | 1282       | 9636          | 1470              | 207      | 17457                  | 1109       | 17282         | 4196              | 208      | 13871                  | 1021       | 16193         | 1421              | 211      | 25855                  | 923        | 20343         | 1161              | 209      | 10158                       | 1638       | 9402          | 2680              |          |
| 1         | 1            | 1              | 6                 | hsa_let_7g        |                | 4476                   | 1204       | 2425          | 1220              | 209      | 11630                  | 1078       | 14138         | 1849              | 210      | 15178                  | 1097       | 16028         | 1436              | 207      | 7264                   | 829        | 5765          | 1248              | 211      | 7875                        | 1397       | 7174          | 1624              |          |
| 1         | 1            | 1              | 7                 | Control_1         |                | 13139                  | 1122       | 14752         | 1516              | 206      | 17418                  | 771        | 6476          | 1021              | 208      | 11503                  | 670        | 14404         | 1045              | 211      | 18290                  | 1107       | 14256         | 1298              | 202      | 7856                        | 1433       | 5699          | 1813              |          |
| 1         | 1            | 1              | 8                 | hsa_miR_203       | mo-miR-203     | 3571                   | 1261       | 1777          | 1682              | 205      | 8912                   | 604        | 13484         | 890               | 209      | 2519                   | 940        | 1401          | 1301              | 205      | 2478                   | 800        | 1627          | 1303              | 207      | 4946                        | 1140       | 3797          | 1718              |          |
| 1         | 1            | 1              | 9                 | hsa_miR_205       | mo-miR-205     | 3312                   | 1278       | 1507          | 1630              | 213      | 12616                  | 939        | 15699         | 2874              | 211      | 2800                   | 1126       | 1528          | 1599              | 205      | 2227                   | 737        | 1700          | 1231              | 207      | 3206                        | 1208       | 2161          | 1850              |          |
| 1         | 1            | 1              | 10                | hsa_miR_208       | mo-miR-208     | 2933                   | 887        | 1395          | 1026              | 208      | 11687                  | 2040       | 14117         | 7576              | 208      | 2493                   | 1002       | 1774          | 1412              | 202      | 2771                   | 1186       | 1432          | 1749              | 203      | 2874                        | 1359       | 1832          | 1773              |          |
| 1         | 1            | 1              | 11                | hsa_miR_210       | mo-miR-210     | 3891                   | 1392       | 1838          | 1748              | 200      | 3118                   | 1630       | 2237          | 2543              | 206      | 3768                   | 1449       | 1689          | 1534              | 201      | 3743                   | 796        | 3256          | 1443              | 206      | 4996                        | 1365       | 5485          | 2348              |          |
| 1         | 1            | 1              | 12                | hsa_miR_212       | mo-miR-212     | 4392                   | 1376       | 3611          | 2978              | 209      | 2588                   | 579        | 2598          | 1035              | 211      | 2886                   | 1154       | 1480          | 1809              | 200      | 3114                   | 916        | 2719          | 1465              | 209      | 3308                        | 1030       | 3240          | 1615              |          |
| 1         | 1            | 1              | 13                | Control_1         |                | 6574                   | 1335       | 8348          | 2946              | 207      | 5449                   | 499        | 4557          | 1091              | 211      | 7990                   | 845        | 6373          | 1259              | 209      | 5585                   | 755        | 4724          | 1323              | 210      | 5482                        | 1296       | 3522          | 1674              |          |
| 1         | 1            | 1              | 14                | hsa_miR_422a      |                | 3625                   | 1139       | 2614          | 1589              | 211      | 1927                   | 413        | 2301          | 914               | 211      | 5376                   | 660        | 4920          | 1083              | 204      | 3127                   | 659        | 2524          | 1030              | 207      | 3621                        | 1672       | 1653          | 2372              |          |
| 1         | 1            | 1              | 15                | hsa_miR_423a      |                | 3181                   | 1278       | 1434          | 1399              | 204      | 1206                   | 407        | 1232          | 800               | 211      | 2451                   | 857        | 2053          | 2021              | 209      | 2303                   | 657        | 1153          | 1129              | 210      | 3081                        | 1420       | 2372          | 1771              |          |
| 1         | 1            | 1              | 16                | hsa_miR_425       |                | 2143                   | 1047       | 2868          | 1684              | 209      | 2139                   | 512        | 1819          | 802               | 204      | 2885                   | 1430       | 1673          | 2386              | 204      | 3301                   | 1116       | 1955          | 1510              | 206      | 3221                        | 1005       | 2145          | 1326              |          |
| 1         | 1            | 1              | 17                | hsa_miR_448       | mo-miR-448     | 2278                   | 1103       | 1460          | 1634              | 207      | 1643                   | 487        | 1292          | 844               | 202      | 2205                   | 900        | 1582          | 1288              | 204      | 1693                   | 428        | 1494          | 817               | 206      | 4132                        | 1164       | 3852          | 2678              |          |
| 1         | 1            | 1              | 18                | hsa_miR_450       |                | 2572                   | 1127       | 1653          | 1487              | 200      | 1369                   | 558        | 1227          | 1044              | 208      | 4982                   | 1080       | 3751          | 1513              | 207      | 6006                   | 570        | 5436          | 1108              | 212      | 5034                        | 1013       | 4552          | 1497              |          |
| 1         | 1            | 1              | 19                | Control_1         |                | 9040                   | 1397       | 6971          | 1827              | 197      | 11578                  | 596        | 10194         | 940               | 207      | 7053                   | 1018       | 6140          | 1526              | 211      | 8661                   | 736        | 7138          | 1389              | 210      | 5492                        | 882        | 4447          | 1549              |          |
| 1         | 1            | 1              | 20                | hsa_miR_520h      |                | 2722                   | 1007       | 1716          | 1326              | 210      | 1285                   | 462        | 1228          | 706               | 213      | 1986                   | 786        | 1444          | 1256              | 207      | 1592                   | 620        | 1418          | 999               | 211      | 2779                        | 945        | 1697          | 1288              |          |
| 1         | 1            | 1              | 21                | hsa_miR_518       |                | 2513                   | 1122       | 1620          | 1504              | 207      | 993                    | 370        | 1108          | 708               | 210      | 1820                   | 592        | 1300          | 973               | 208      | 1700                   | 638        | 1650          | 1000              | 210      | 2688                        | 768        | 1579          | 933               |          |
| 1         | 1            | 1              | 22                | hsa_miR_523a      |                | 3006                   | 1236       | 2037          | 1636              | 201      | 1164                   | 535        | 1401          | 1203              | 209      | 1989                   | 610        | 1434          | 978               | 208      | 2010                   | 900        | 1387          | 1516              | 205      | 2698                        | 924        | 2018          | 1423              |          |
| 1         | 1            | 1              | 23                | hsa_miR_518c      |                | 2497                   | 1008       | 1649          | 1499              | 209      | 1291                   | 522        | 1138          | 806               | 205      | 1809                   | 685        | 1545          | 1217              | 209      | 1888                   | 774        | 1770          | 1324              | 208      | 2546                        | 1091       | 1575          | 1858              |          |
| 1         | 1            | 1              | 24                | hsa_miR_518d      |                | 3736                   | 1350       | 1793          | 1520              | 206      | 1433                   | 530        | 1441          | 828               | 212      | 2798                   | 985        | 1802          | 1359              | 205      | 1712                   | 594        | 3030          | 1062              | 211      | 2660                        | 1186       | 1857          | 1851              |          |
| 1         | 1            | 2              | 1                 | hsa_miR_125a      | mo-miR-125a    | 11625                  | 1331       | 9695          | 1831              | 205      | 10888                  | 804        | 9523          | 1181              | 211      | 18145                  | 877        | 18673         | 1218              | 208      | 12368                  | 1387       | 2090          | 2928              | 210      | 11113                       | 1395       | 9939          | 5427              |          |
| 1         | 1            | 2              | 2                 | hsa_miR_126a      | mo-miR-126a    | 25294                  | 1688       | 18166         | 1532              | 202      | 28094                  | 2315       | 22725         | 9755              | 210      | 28367                  | 982        | 22422         | 1312              | 209      | 36647                  | 2789       | 28869         | 6675              | 195      | 25774                       | 2916       | 19976         | 1949              |          |
| 1         | 1            | 2              | 3                 | hsa_miR_127       | mo-miR-127     | 14991                  | 3864       | 11322         | 5741              | 195      | 7682                   | 5595       | 10133         | 14821             | 202      | 7673                   | 3294       | 6656          | 6596              | 205      | 3292                   | 1448       | 1184          | 2145              | 199      | 16021                       | 1644       | 12045         | 2422              |          |
| 1         | 1            | 2              | 4                 | hsa_miR_129       |                | 8950                   | 1731       | 10625         | 3468              | 208      | 9972                   | 3237       | 9612          | 11280             | 206      | 3786                   | 2265       | 1797          | 4759              | 202      | 16154                  | 1050       | 18288         | 2030              | 210      | 10621                       | 1244       | 8080          | 1772              |          |
| 1         | 1            | 2              | 5                 | hsa_miR_130b      | mo-miR-130b    | 3848                   | 980        | 2218          | 1285              | 210      | 6169                   | 1165       | 6937          | 4228              | 210      | 2798                   | 1140       | 1428          | 1261              | 210      | 16845                  | 827        | 14868         | 921               | 208      | 12257                       | 1891       | 10854         | 3043              |          |
| 1         | 1            | 2              | 6                 | hsa_miR_133a      | mo-miR-133a    | 3709                   | 1224       | 1836          | 1442              | 202      | 3639                   | 729        | 3929          | 1114              | 209      | 2658                   | 730        | 2244          | 1066              | 204      | 2111                   | 796        | 1351          | 1152              | 208      | 10043                       | 3556       | 7518          | 5708              |          |
| 1         | 1            | 2              | 7                 | hsa_miR_23a       | mo-miR-23a     | 23090                  | 3269       | 18708         | 7477              | 198      | 12762                  | 840        | 11217         | 1372              | 209      | 27144                  | 3194       | 21144         | 8534              | 208      | 27835                  | 923        | 16975         | 1180              | 211      | 18174                       | 1273       | 17964         | 1792              |          |
| 1         | 1            | 2              | 8                 | hsa_miR_24        | mo-miR-24      | 15439                  | 3244       | 12889         | 7410              | 205      | 18839                  | 734        | 18207         | 1301              | 211      | 22021                  | 2827       | 17704         | 6477              | 212      | 24115                  | 1773       | 15299         | 3312              | 211      | 18574                       | 1002       | 14589         | 1317              |          |
| 1         | 1            | 2              | 9                 | hsa_miR_26a       | mo-miR-26a     | 28679                  | 1093       | 22370         | 1581              | 207      | 39042                  | 745        | 26109         | 1055              | 208      | 39652                  | 860        | 25300         | 1083              | 208      | 47147                  | 855        | 24769         | 1394              | 205      | 36239                       | 1320       | 24039         | 1826              |          |
| 1         | 1            | 2              | 10                | hsa_miR_27a       | mo-miR-27a     | 14828                  | 832        | 13577         | 1203              | 211      | 26237                  | 4228       | 16423         | 10043             | 203      | 25793                  | 1410       | 16390         | 1918              | 203      | 32707                  | 1116       | 21623         | 1485              | 202      | 19012                       | 1087       | 15059         | 1425              |          |
| 1         | 1            | 2              | 11                | hsa_miR_28        | mo-miR-28      | 2600                   | 713        | 1599          | 949               | 205      | 12013                  | 2011       | 12073         | 5849              | 204      | 7481                   | 914        | 7841          | 1162              | 207      | 2602                   | 735        | 2015          | 1159              | 202      | 2876                        | 1066       | 1909          | 1699              |          |
| 1         | 1            | 2              | 12                | hsa_miR_299_5p    | mo-miR-299     | 3457                   | 1012       | 2325          | 1192              | 208      | 2068                   | 654        | 1813          | 1057              | 210      | 2804                   | 898        | 1775          | 1338              | 207      | 2141                   | 922        | 1336          | 1150              | 208      | 3238                        | 1657       | 1904          | 2720              |          |
| 1         | 1            | 2              | 13                | mmu_miR_128_3p    | mo-miR-129*    | 2741                   | 1096       | 1886          | 1481              | 208      | 1729                   | 428        | 1965          | 1084              | 207      | 2229                   | 902        | 1356          | 1289              | 204      | 2605                   | 681        | 4144          | 948               | 206      | 2934                        | 1284       | 2031          | 1920              |          |
| 1         | 1            | 2              | 14                | mmu_miR_151       |                | 2837                   | 1022       | 1916          | 1508              | 206      | 1590                   | 391        | 1540          | 679               | 210      | 2443                   | 815        | 1605          | 1191              | 209      | 2863                   | 723        | 2242          | 1146              | 204      | 3389                        | 1232       | 1511          | 1304              |          |
| 1         | 1            | 2              | 15                | mmu_miR_17_3p     |                | 2566                   | 928        | 1771          | 1276              | 207      | 1269                   | 514        | 1300          | 891               | 206      | 2755                   | 878        | 1992          | 1235              | 210      | 2342                   | 1177       | 1399          | 2097              | 206      | 3345                        | 1196       | 1744          | 1414              |          |
| 1         | 1            | 2              | 16                | mmu_miR_199b      |                | 2862                   | 834        | 2098          | 1348              | 210      | 1893                   | 465        | 2183          | 937               | 210      | 2643                   | 966        | 1771          | 1288              | 208      | 3075                   | 1007       | 1841          | 1419              | 204      | 3338                        | 1066       | 1932          | 1645              |          |
| 1         | 1            | 2              | 17                | mmu_miR_202       |                | 2467                   | 693        | 1610          | 906               | 206      | 1233                   | 466        | 1361          | 1080              | 211      | 2871                   | 744        | 2347          | 1129              | 206      | 1525                   | 439        | 1434          | 748               | 207      | 3250                        | 1088       | 1323          | 1367              |          |
| 1         | 1            | 2              | 18                | mmu_miR_211       | mo-miR-211     | 2862                   | 823        | 1519          | 1093              | 208      | 1530                   | 479        | 1489          | 895               | 209      | 2824                   | 533        | 2678          | 777               | 209      | 1864                   | 672        | 1758          | 1323              | 212      | 2946                        | 972        | 3055          | 1242              |          |
| 1         | 1            | 2              | 19                | hsa_miR_508       |                | 2510                   | 601        | 1908          | 767               | 212      | 1233                   | 379        | 1206          | 750               | 211      | 2772                   | 361        | 3037          | 715               | 212      | 2007                   | 640        | 1488          | 1207              | 208      | 3354                        | 1219       | 1535          | 1469              |          |
| 1         | 1            | 2              | 20                | ambi_miR_7036     |                | 2584                   | 927        | 1348          | 1348              | 208      | 1373                   | 312        | 1430          | 569               | 210      | 2070                   | 592        | 1710          | 1029              | 211      | 2588                   | 708        | 2286          | 1011              | 206      | 2660                        | 1169       | 1812          | 1697              |          |
| 1         | 1            | 2              | 21                | ambi_miR_7038_1   |                | 2740                   | 1087       | 1112          | 1292              | 209      | 1310                   | 353        | 1224          | 580               | 210      | 2373                   | 808        | 1545          | 1244              | 209      | 2264                   | 569        | 2218          | 883               | 208      | 2919                        | 1365       | 2248          | 2082              |          |
| 1         | 1            | 2              | 22                | hsa_miR_488       |                | 2329                   | 930        | 1647          | 1233              | 210      | 1048                   | 403        | 1134          | 796               | 210      | 2764                   | 110        |               |                   |          |                        |            |               |                   |          |                             |            |               |                   |          |

|   |   |   |    |                |             |       |      |       |      |     |       |     |       |      |     |       |      |       |      |     |       |      |       |       |     |       |      |       |      |
|---|---|---|----|----------------|-------------|-------|------|-------|------|-----|-------|-----|-------|------|-----|-------|------|-------|------|-----|-------|------|-------|-------|-----|-------|------|-------|------|
| 1 | 1 | 4 | 19 | hsa_miR_202_AS |             | 2824  | 1012 | 1370  | 1204 | 207 | 1833  | 409 | 1475  | 573  | 209 | 1980  | 855  | 1460  | 1179 | 206 | 2084  | 774  | 1771  | 1453  | 213 | 3320  | 1109 | 1839  | 1296 |
| 1 | 1 | 4 | 20 | ambi_miR_7084  |             | 2185  | 879  | 1306  | 1295 | 209 | 2155  | 811 | 1248  | 1199 | 200 | 1814  | 705  | 1354  | 1006 | 206 | 1862  | 530  | 1559  | 860   | 212 | 2453  | 896  | 1742  | 1289 |
| 1 | 1 | 4 | 21 | ambi_miR_7086  |             | 1610  | 644  | 1482  | 1222 | 210 | 1610  | 644 | 1223  | 1074 | 203 | 1759  | 552  | 1416  | 816  | 207 | 2131  | 991  | 1423  | 1766  | 212 | 3138  | 1077 | 2107  | 1365 |
| 1 | 1 | 4 | 22 | hsa_miR_504    |             | 2522  | 983  | 1800  | 1304 | 208 | 1357  | 485 | 1240  | 924  | 209 | 1710  | 654  | 1429  | 1211 | 208 | 2023  | 752  | 1490  | 1236  | 209 | 2868  | 1019 | 1603  | 1216 |
| 1 | 1 | 4 | 23 | hsa_miR_503    |             | 2342  | 1051 | 1824  | 1397 | 210 | 1286  | 429 | 1412  | 750  | 207 | 2033  | 551  | 1484  | 750  | 207 | 1553  | 528  | 1544  | 876   | 212 | 2819  | 807  | 2040  | 1072 |
| 1 | 1 | 4 | 24 | hsa_miR_511    |             | 3033  | 1267 | 1680  | 1558 | 209 | 1190  | 433 | 955   | 720  | 212 | 2081  | 742  | 1633  | 1145 | 209 | 2008  | 651  | 1449  | 1097  | 205 | 2976  | 1216 | 1665  | 1668 |
| 1 | 2 | 1 | 1  | Control_2      |             | 2685  | 1044 | 1454  | 1413 | 206 | 1230  | 435 | 1100  | 692  | 209 | 3784  | 1702 | 2753  | 2674 | 206 | 1241  | 620  | 1368  | 1011  | 212 | 2391  | 592  | 2228  | 989  |
| 1 | 2 | 1 | 2  | Control_4      |             | 3023  | 1241 | 1828  | 1729 | 210 | 4968  | 671 | 9351  | 1276 | 210 | 4714  | 824  | 4972  | 1137 | 198 | 2362  | 869  | 1992  | 1470  | 209 | 3667  | 982  | 2192  | 1363 |
| 1 | 2 | 1 | 3  | hsa let_7b     | mo-let-7b   | 20293 | 1577 | 15026 | 1608 | 205 | 15924 | 502 | 14762 | 1083 | 213 | 28063 | 1182 | 18086 | 1432 | 197 | 24728 | 812  | 22165 | 1344  | 211 | 24518 | 1108 | 18637 | 1544 |
| 1 | 2 | 1 | 4  | hsa let_7d     | mo-let-7d   | 14627 | 2054 | 12409 | 2086 | 204 | 9818  | 444 | 9429  | 817  | 212 | 17283 | 1341 | 15918 | 2207 | 208 | 13677 | 566  | 13245 | 1042  | 213 | 12561 | 2033 | 12061 | 3118 |
| 1 | 2 | 1 | 5  | hsa let_7f     | mo-let-7f   | 8475  | 2554 | 4877  | 4647 | 201 | 6695  | 667 | 8189  | 987  | 208 | 10470 | 1212 | 11505 | 3124 | 208 | 6363  | 504  | 9281  | 744   | 210 | 8588  | 2390 | 7459  | 3636 |
| 1 | 2 | 1 | 6  | hsa let_7i     | mo-let-7i   | 4775  | 2150 | 3796  | 5136 | 207 | 4115  | 518 | 3168  | 741  | 203 | 6267  | 982  | 6971  | 1596 | 207 | 3657  | 713  | 3695  | 1106  | 210 | 5295  | 1560 | 5704  | 2218 |
| 1 | 2 | 1 | 7  | hsa miR_200c   | mo-miR-200c | 4145  | 693  | 3618  | 1241 | 213 | 4010  | 557 | 3909  | 984  | 211 | 5137  | 531  | 6768  | 781  | 210 | 6443  | 1069 | 5733  | 1540  | 205 | 4934  | 1306 | 2589  | 1465 |
| 1 | 2 | 1 | 8  | hsa miR_204    | mo-miR-204  | 3135  | 881  | 1543  | 989  | 207 | 1917  | 483 | 2093  | 806  | 211 | 4063  | 704  | 4551  | 928  | 207 | 1891  | 389  | 1844  | 773   | 211 | 4408  | 1262 | 2857  | 1559 |
| 1 | 2 | 1 | 9  | hsa miR_206    | mo-miR-206  | 3501  | 1389 | 2175  | 2222 | 209 | 1997  | 328 | 2151  | 734  | 209 | 2496  | 795  | 1473  | 1141 | 208 | 1625  | 735  | 1896  | 1461  | 211 | 4326  | 1751 | 2286  | 2000 |
| 1 | 2 | 1 | 10 | hsa miR_21     | mo-miR-21   | 8844  | 1612 | 7745  | 4671 | 209 | 6932  | 412 | 8589  | 733  | 209 | 8598  | 957  | 7077  | 1485 | 208 | 7723  | 813  | 7491  | 1141  | 208 | 4312  | 1105 | 2978  | 1719 |
| 1 | 2 | 1 | 11 | hsa miR_211    |             | 4296  | 888  | 4100  | 1175 | 209 | 2159  | 574 | 2030  | 923  | 203 | 4556  | 1852 | 4044  | 4646 | 207 | 4871  | 855  | 1468  | 1202  | 205 | 3917  | 872  | 3802  | 1647 |
| 1 | 2 | 1 | 12 | hsa miR_213    | mo-miR-213  | 2701  | 926  | 1592  | 1314 | 206 | 1153  | 268 | 1136  | 584  | 208 | 1846  | 737  | 1533  | 1159 | 203 | 1388  | 455  | 1269  | 785   | 204 | 3432  | 1195 | 2369  | 1824 |
| 1 | 2 | 1 | 13 | hsa miR_284    |             | 2479  | 983  | 1377  | 1182 | 203 | 1044  | 403 | 1023  | 692  | 210 | 1525  | 752  | 1161  | 1126 | 207 | 1632  | 666  | 1484  | 1336  | 210 | 2464  | 890  | 1748  | 1416 |
| 1 | 2 | 1 | 14 | hsa miR_422b   |             | 2315  | 632  | 1931  | 780  | 211 | 2281  | 572 | 2541  | 1059 | 210 | 2293  | 660  | 1931  | 1059 | 209 | 2698  | 562  | 2613  | 1319  | 211 | 2576  | 766  | 2042  | 1389 |
| 1 | 2 | 1 | 15 | hsa miR_424    |             | 2625  | 783  | 2153  | 1132 | 208 | 1484  | 541 | 1874  | 1155 | 213 | 1919  | 882  | 1265  | 1449 | 205 | 2873  | 697  | 2754  | 1414  | 208 | 3091  | 1556 | 1715  | 2451 |
| 1 | 2 | 1 | 16 | hsa miR_429    |             | 2016  | 585  | 1432  | 731  | 207 | 997   | 432 | 1058  | 825  | 207 | 2261  | 938  | 1737  | 1549 | 203 | 1756  | 606  | 1318  | 1113  | 208 | 3332  | 2038 | 1501  | 4045 |
| 1 | 2 | 1 | 17 | hsa miR_449    | mo-miR-449  | 2079  | 877  | 1299  | 1380 | 208 | 1073  | 526 | 1179  | 1116 | 210 | 1981  | 729  | 1583  | 1468 | 210 | 1717  | 674  | 2035  | 1237  | 210 | 2411  | 1420 | 2289  | 4523 |
| 1 | 2 | 1 | 18 | hsa miR_7      |             | 2355  | 1127 | 1406  | 2164 | 207 | 1765  | 606 | 1260  | 896  | 206 | 2563  | 960  | 1902  | 1415 | 206 | 1420  | 549  | 1309  | 1016  | 211 | 1944  | 469  | 1856  | 823  |
| 1 | 2 | 1 | 19 | hsa miR_520d   |             | 2276  | 806  | 1657  | 1258 | 209 | 1302  | 707 | 915   | 1110 | 198 | 1855  | 1014 | 1369  | 1766 | 210 | 1369  | 497  | 1099  | 730   | 208 | 2890  | 890  | 1454  | 1084 |
| 1 | 2 | 1 | 20 | hsa miR_517a   |             | 3219  | 1238 | 1545  | 1430 | 205 | 1476  | 427 | 1315  | 729  | 206 | 1747  | 937  | 1531  | 1372 | 206 | 1354  | 338  | 1250  | 495   | 207 | 2418  | 881  | 1814  | 1213 |
| 1 | 2 | 1 | 21 | hsa miR_521    |             | 2554  | 1167 | 1386  | 1475 | 205 | 1527  | 458 | 1145  | 779  | 208 | 2813  | 1001 | 1373  | 1297 | 204 | 1647  | 408  | 1911  | 862   | 210 | 1708  | 809  | 1460  | 1632 |
| 1 | 2 | 1 | 22 | hsa miR_518f   |             | 2862  | 1183 | 1604  | 1489 | 209 | 1063  | 500 | 1025  | 967  | 213 | 1836  | 625  | 1273  | 960  | 208 | 2711  | 7021 | 1694  | 17937 | 208 | 2528  | 735  | 1550  | 1267 |
| 1 | 2 | 1 | 23 | hsa miR_518b   |             | 2280  | 1015 | 1302  | 1527 | 208 | 1066  | 442 | 943   | 711  | 206 | 2244  | 876  | 1420  | 1056 | 201 | 1877  | 784  | 1333  | 1194  | 202 | 3047  | 787  | 1985  | 897  |
| 1 | 2 | 1 | 24 | hsa miR_525_AS |             | 2939  | 1239 | 1710  | 2150 | 205 | 1689  | 497 | 1390  | 750  | 204 | 3219  | 1035 | 1845  | 1073 | 203 | 3503  | 894  | 8114  | 1318  | 204 | 2127  | 822  | 1696  | 1282 |
| 1 | 2 | 2 | 1  | hsa miR_125b   | mo-miR-125b | 9214  | 2200 | 7735  | 3184 | 197 | 4218  | 614 | 3915  | 1139 | 206 | 4789  | 1732 | 3333  | 2737 | 201 | 5058  | 799  | 4454  | 1425  | 205 | 4286  | 714  | 3258  | 1026 |
| 1 | 2 | 2 | 2  | hsa miR_126_AS | mo-miR-126* | 7542  | 4118 | 5535  | 3219 | 196 | 1793  | 782 | 1166  | 1102 | 209 | 7894  | 1067 | 9840  | 1961 | 202 | 2321  | 511  | 2035  | 879   | 206 | 2429  | 659  | 2020  | 992  |
| 1 | 2 | 2 | 3  | hsa miR_128a   |             | 15808 | 3965 | 12401 | 3681 | 185 | 1946  | 561 | 1648  | 917  | 210 | 8774  | 1120 | 13722 | 1318 | 204 | 3518  | 1122 | 3546  | 1991  | 210 | 9626  | 1978 | 8157  | 3186 |
| 1 | 2 | 2 | 4  | hsa miR_130a   | mo-miR-130a | 8459  | 3065 | 3389  | 2910 | 202 | 2980  | 480 | 2583  | 825  | 207 | 3547  | 1247 | 7134  | 1552 | 206 | 4544  | 780  | 3481  | 1156  | 210 | 6487  | 2807 | 4441  | 4521 |
| 1 | 2 | 2 | 5  | hsa miR_130a   | mo-miR-130a | 3733  | 1938 | 1185  | 1963 | 203 | 1727  | 540 | 1075  | 780  | 207 | 7383  | 807  | 2258  | 982  | 203 | 2345  | 910  | 1370  | 1159  | 196 | 4984  | 1517 | 4084  | 2372 |
| 1 | 2 | 2 | 6  | hsa miR_134    | mo-miR-134  | 4202  | 1470 | 2135  | 1547 | 205 | 4008  | 431 | 5042  | 789  | 211 | 5492  | 674  | 6063  | 1649 | 207 | 10470 | 1198 | 9594  | 1768  | 212 | 3824  | 1113 | 2063  | 1414 |
| 1 | 2 | 2 | 7  | hsa miR_23b    | mo-miR-23b  | 17874 | 1245 | 13932 | 1645 | 207 | 14941 | 910 | 13023 | 1801 | 209 | 20969 | 883  | 19286 | 1840 | 212 | 22575 | 1189 | 20986 | 2909  | 211 | 15054 | 1273 | 11963 | 1500 |
| 1 | 2 | 2 | 8  | hsa miR_25     | mo-miR-25   | 7003  | 1292 | 7804  | 2278 | 212 | 4001  | 977 | 3082  | 1750 | 205 | 7464  | 768  | 7348  | 1026 | 206 | 2316  | 722  | 1598  | 945   | 209 | 7741  | 1022 | 7020  | 1366 |
| 1 | 2 | 2 | 9  | hsa miR_26b    | mo-miR-26b  | 7648  | 1080 | 7488  | 1547 | 209 | 2784  | 662 | 2595  | 1300 | 207 | 4333  | 908  | 3061  | 1164 | 207 | 3495  | 750  | 3181  | 1211  | 206 | 5235  | 1232 | 1910  | 4933 |
| 1 | 2 | 2 | 10 | hsa miR_27b    | mo-miR-27b  | 8955  | 1248 | 6719  | 1393 | 204 | 5880  | 251 | 2938  | 509  | 210 | 10899 | 1149 | 7907  | 1364 | 201 | 8428  | 901  | 9709  | 1263  | 206 | 6063  | 1305 | 5391  | 2296 |
| 1 | 2 | 2 | 11 | hsa miR_296    | mo-miR-296  | 3624  | 2298 | 2688  | 4466 | 212 | 3095  | 937 | 5987  | 1390 | 209 | 3427  | 1308 | 2293  | 2186 | 205 | 1841  | 787  | 1359  | 1305  | 210 | 2206  | 884  | 1978  | 1997 |
| 1 | 2 | 2 | 12 | hsa miR_29a    | mo-miR-29a  | 7666  | 1011 | 7067  | 1315 | 202 | 6576  | 591 | 5314  | 859  | 195 | 8757  | 855  | 7311  | 1306 | 205 | 16360 | 626  | 17420 | 1021  | 206 | 5629  | 680  | 5092  | 1302 |
| 1 | 2 | 2 | 13 | mmu miR_140_AS |             | 3990  | 1287 | 2228  | 1821 | 195 | 1871  | 404 | 1669  | 727  | 204 | 2934  | 933  | 2511  | 1584 | 207 | 2172  | 717  | 1667  | 1347  | 207 | 2900  | 876  | 1940  | 1376 |
| 1 | 2 | 2 | 14 | mmu miR_155    |             | 2163  | 625  | 1431  | 841  | 210 | 1485  | 409 | 1389  | 846  | 209 | 3067  | 939  | 2245  | 1478 | 205 | 1873  | 705  | 1555  | 1272  | 209 | 3751  | 1172 | 2397  | 1547 |
| 1 | 2 | 2 | 15 | mmu miR_192    |             | 1954  | 766  | 1539  | 1257 | 210 | 1195  | 281 | 1309  | 508  | 212 | 1126  | 685  | 1485  | 1311 | 208 | 1482  | 357  | 2322  | 732   | 211 | 2608  | 1005 | 1949  | 1642 |
| 1 | 2 | 2 | 16 | mmu miR_201    |             | 2182  | 1167 | 1191  | 1547 | 206 | 1240  | 516 | 1276  | 883  | 210 | 2391  | 621  | 1885  | 880  | 205 | 1510  | 611  | 1197  | 1027  | 209 | 2875  | 1129 | 1611  | 1615 |
| 1 | 2 | 2 | 17 | mmu miR_207    |             | 3115  | 1184 | 1196  | 1442 | 194 | 1136  | 529 | 1155  | 1012 | 208 | 1835  | 698  | 1555  | 1085 | 207 | 3234  | 988  | 6920  | 1410  | 201 | 2824  | 989  | 1619  | 1254 |
| 1 | 2 | 2 | 18 | mmu miR_215    |             | 2210  | 958  | 1652  | 1311 | 207 | 1265  | 486 | 1002  | 827  | 210 | 1746  | 676  | 1370  | 1153 | 209 | 1406  | 551  | 1498  |       |     |       |      |       |      |

|   |   |   |    |                 |             |       |      |       |      |     |       |      |       |       |     |       |      |       |       |     |       |      |       |      |     |       |      |       |      |
|---|---|---|----|-----------------|-------------|-------|------|-------|------|-----|-------|------|-------|-------|-----|-------|------|-------|-------|-----|-------|------|-------|------|-----|-------|------|-------|------|
| 1 | 2 | 4 | 22 | ambi_miR_7089   |             | 3052  | 1168 | 1657  | 1509 | 204 | 1814  | 582  | 1141  | 877   | 205 | 3116  | 999  | 1828  | 1299  | 205 | 2073  | 893  | 1622  | 1310 | 211 | 2759  | 1459 | 1355  | 2324 |
| 1 | 2 | 4 | 23 | hsa_miR_452_AS  |             | 1709  | 932  | 1188  | 1236 | 210 | 1642  | 747  | 1145  | 1060  | 202 | 1810  | 829  | 1390  | 1230  | 208 | 2208  | 790  | 1873  | 1076 | 207 | 3063  | 1345 | 1587  | 1966 |
| 1 | 2 | 4 | 24 | hsa_miR_485_5p  |             | 1606  | 771  | 1284  | 1208 | 213 | 1968  | 633  | 1391  | 912   | 206 | 1985  | 923  | 1311  | 1362  | 207 | 2255  | 794  | 3422  | 1187 | 207 | 3618  | 1232 | 1607  | 1579 |
| 2 | 1 | 1 | 1  | Control_1       |             | 7387  | 941  | 6577  | 1128 | 209 | 9855  | 727  | 8052  | 1012  | 212 | 12672 | 1288 | 10025 | 1524  | 207 | 13636 | 1078 | 11338 | 1783 | 210 | 8754  | 1102 | 6887  | 1388 |
| 2 | 1 | 1 | 2  | Control_3       |             | 3260  | 1178 | 1703  | 1661 | 203 | 17482 | 1998 | 18675 | 5786  | 207 | 2107  | 722  | 1449  | 1026  | 206 | 10979 | 830  | 12811 | 1300 | 210 | 4365  | 1611 | 3406  | 2623 |
| 2 | 1 | 1 | 3  | hsa_let_7a      | mo-let-7a   | 17299 | 1254 | 16764 | 1562 | 209 | 19109 | 1018 | 16026 | 1079  | 208 | 28735 | 1143 | 21690 | 1431  | 207 | 22393 | 859  | 18526 | 1324 | 212 | 23424 | 1589 | 2084  | 2257 |
| 2 | 1 | 1 | 4  | hsa_let_7c      | mo-let-7c   | 28402 | 1441 | 20943 | 1633 | 209 | 31344 | 2124 | 21804 | 4687  | 205 | 40336 | 1076 | 23793 | 1619  | 207 | 32129 | 920  | 23258 | 1071 | 206 | 30444 | 1709 | 20747 | 1972 |
| 2 | 1 | 1 | 5  | hsa_let_7e      | mo-let-7e   | 14460 | 1464 | 14803 | 1510 | 198 | 11892 | 5463 | 6845  | 10245 | 199 | 16929 | 4247 | 14231 | 8733  | 203 | 18438 | 947  | 16895 | 1140 | 209 | 9342  | 1708 | 8234  | 2921 |
| 2 | 1 | 1 | 6  | hsa_let_7g      |             | 5929  | 1204 | 4270  | 1384 | 212 | 10410 | 2165 | 13789 | 5466  | 208 | 11463 | 2751 | 11189 | 4782  | 211 | 6106  | 602  | 5243  | 1035 | 212 | 6497  | 1249 | 4798  | 1410 |
| 2 | 1 | 1 | 7  | Control_1       |             | 13440 | 1566 | 14183 | 2769 | 209 | 8167  | 682  | 11446 | 1280  | 210 | 7808  | 803  | 8466  | 1177  | 209 | 13013 | 935  | 8507  | 1257 | 205 | 6983  | 1425 | 6282  | 2076 |
| 2 | 1 | 1 | 8  | hsa_miR_203     | mo-miR-203  | 4351  | 1656 | 1562  | 1766 | 193 | 2194  | 649  | 1778  | 1052  | 209 | 9412  | 1268 | 11944 | 1623  | 208 | 3270  | 918  | 1998  | 1158 | 206 | 3300  | 985  | 2272  | 1382 |
| 2 | 1 | 1 | 9  | hsa_miR_205     | mo-miR-205  | 4068  | 1977 | 1487  | 2209 | 204 | 1909  | 807  | 1285  | 1221  | 209 | 14951 | 1383 | 16312 | 2292  | 206 | 2728  | 741  | 1735  | 979  | 208 | 4674  | 1952 | 1613  | 2593 |
| 2 | 1 | 1 | 10 | hsa_miR_208     | mo-miR-208  | 3026  | 1251 | 1225  | 1347 | 207 | 1743  | 688  | 1035  | 1007  | 204 | 11477 | 1420 | 10778 | 2384  | 204 | 2263  | 763  | 1577  | 1021 | 210 | 6977  | 1440 | 5310  | 1752 |
| 2 | 1 | 1 | 11 | hsa_miR_210     | mo-miR-210  | 4411  | 1690 | 2423  | 2017 | 201 | 2030  | 684  | 1251  | 1051  | 207 | 2736  | 698  | 2042  | 1057  | 207 | 2120  | 678  | 1926  | 1199 | 209 | 3909  | 912  | 3281  | 1582 |
| 2 | 1 | 1 | 12 | hsa_miR_212     | mo-miR-212  | 3641  | 1599 | 2160  | 2781 | 206 | 2850  | 708  | 1833  | 1309  | 203 | 3454  | 758  | 2970  | 1110  | 208 | 3371  | 972  | 2638  | 1626 | 206 | 4842  | 1521 | 3862  | 2167 |
| 2 | 1 | 1 | 13 | Control_1       |             | 5542  | 1512 | 6382  | 4252 | 204 | 5948  | 673  | 4470  | 1428  | 205 | 7512  | 1551 | 4775  | 2205  | 203 | 6405  | 884  | 4788  | 1393 | 208 | 4836  | 1142 | 3990  | 1718 |
| 2 | 1 | 1 | 14 | hsa_miR_422a    |             | 3419  | 1187 | 1819  | 1501 | 203 | 2724  | 504  | 2271  | 750   | 206 | 3499  | 1316 | 1908  | 1650  | 200 | 2842  | 865  | 2268  | 1295 | 205 | 2749  | 769  | 2062  | 1337 |
| 2 | 1 | 1 | 15 | hsa_miR_423     |             | 3597  | 1061 | 1654  | 1162 | 202 | 1318  | 470  | 1274  | 1041  | 213 | 2990  | 928  | 1675  | 1324  | 204 | 2098  | 860  | 1449  | 1558 | 208 | 3031  | 1041 | 2054  | 1379 |
| 2 | 1 | 1 | 16 | hsa_miR_425     |             | 3268  | 1060 | 1776  | 1489 | 202 | 1557  | 452  | 1404  | 848   | 205 | 2624  | 994  | 1779  | 1388  | 202 | 1598  | 924  | 1272  | 1749 | 202 | 2560  | 1011 | 1815  | 1421 |
| 2 | 1 | 1 | 17 | hsa_miR_448     | mo-miR-448  | 2975  | 1027 | 1769  | 1178 | 208 | 2897  | 372  | 2981  | 793   | 213 | 3282  | 827  | 2800  | 1524  | 209 | 1934  | 755  | 1992  | 1637 | 206 | 4020  | 1076 | 3158  | 1738 |
| 2 | 1 | 1 | 18 | hsa_miR_450     |             | 2834  | 989  | 1584  | 1190 | 202 | 3226  | 1142 | 2643  | 2411  | 210 | 4441  | 978  | 3712  | 1767  | 207 | 1718  | 491  | 1771  | 890  | 211 | 3569  | 613  | 2632  | 780  |
| 2 | 1 | 1 | 19 | Control_1       |             | 6527  | 1326 | 4343  | 1610 | 204 | 4191  | 400  | 4173  | 738   | 211 | 7904  | 716  | 6501  | 1229  | 211 | 15045 | 781  | 10755 | 964  | 209 | 4842  | 1182 | 2687  | 1767 |
| 2 | 1 | 1 | 20 | hsa_miR_520h    |             | 2096  | 734  | 1571  | 1174 | 213 | 1864  | 603  | 1277  | 1055  | 207 | 2697  | 1009 | 1497  | 1406  | 199 | 1994  | 920  | 1725  | 1792 | 202 | 3512  | 2427 | 1927  | 6364 |
| 2 | 1 | 1 | 21 | hsa_miR_518e    |             | 2559  | 948  | 1462  | 1299 | 208 | 1145  | 454  | 1197  | 736   | 209 | 2463  | 856  | 1618  | 1137  | 207 | 1919  | 647  | 1559  | 919  | 208 | 3423  | 1693 | 2173  | 4621 |
| 2 | 1 | 1 | 22 | hsa_miR_523     |             | 2114  | 734  | 1552  | 1326 | 210 | 1693  | 730  | 1306  | 989   | 204 | 1589  | 442  | 1695  | 826   | 210 | 1353  | 488  | 1209  | 984  | 208 | 2107  | 715  | 1451  | 989  |
| 2 | 1 | 1 | 23 | hsa_miR_518c    |             | 2619  | 908  | 1433  | 1229 | 201 | 1657  | 654  | 1227  | 996   | 206 | 2327  | 873  | 1620  | 1165  | 205 | 1839  | 868  | 1335  | 2541 | 204 | 3156  | 968  | 1920  | 1386 |
| 2 | 1 | 1 | 24 | hsa_miR_518a    |             | 2396  | 745  | 1770  | 1154 | 210 | 1342  | 633  | 1191  | 1073  | 208 | 1854  | 691  | 1440  | 986   | 211 | 2120  | 1223 | 1635  | 3116 | 208 | 2906  | 1019 | 2175  | 1831 |
| 2 | 1 | 2 | 1  | hsa_miR_125a    | mo-miR-125a | 12198 | 1129 | 12169 | 1395 | 209 | 9226  | 861  | 8401  | 1144  | 201 | 13944 | 1493 | 10301 | 2437  | 204 | 9729  | 1398 | 7113  | 2051 | 198 | 10502 | 1179 | 953   | 1535 |
| 2 | 1 | 2 | 2  | hsa_miR_126     | mo-miR-126  | 19771 | 1436 | 16389 | 1826 | 209 | 27019 | 3990 | 18441 | 9871  | 211 | 28057 | 927  | 24251 | 1224  | 206 | 24222 | 733  | 20751 | 1030 | 214 | 22579 | 1522 | 18398 | 1766 |
| 2 | 1 | 2 | 3  | hsa_miR_127     | mo-miR-127  | 6627  | 1163 | 7425  | 1874 | 205 | 2506  | 875  | 1479  | 1148  | 203 | 17904 | 4689 | 18724 | 13674 | 208 | 2105  | 701  | 10621 | 1002 | 211 | 7313  | 2277 | 8015  | 7962 |
| 2 | 1 | 2 | 4  | hsa_miR_129     |             | 6388  | 1585 | 5674  | 2274 | 204 | 2345  | 6054 | 1323  | 18105 | 208 | 13939 | 6368 | 14283 | 13921 | 206 | 3197  | 1194 | 4412  | 1403 | 204 | 3971  | 1716 | 2469  | 2976 |
| 2 | 1 | 2 | 5  | hsa_miR_130b    | mo-miR-130b | 8185  | 2518 | 6180  | 5395 | 199 | 2427  | 634  | 2102  | 915   | 210 | 3697  | 1230 | 2285  | 1881  | 206 | 3579  | 1241 | 1821  | 1338 | 202 | 4362  | 1851 | 2432  | 2881 |
| 2 | 1 | 2 | 6  | hsa_miR_133a    | mo-miR-133a | 3861  | 836  | 3289  | 1093 | 207 | 2653  | 678  | 1829  | 888   | 201 | 3595  | 986  | 2732  | 1516  | 209 | 2371  | 630  | 1513  | 796  | 206 | 10334 | 1557 | 8357  | 1943 |
| 2 | 1 | 2 | 7  | hsa_miR_23a     | mo-miR-23a  | 15221 | 1168 | 14763 | 1732 | 212 | 24912 | 1596 | 21826 | 3096  | 205 | 25321 | 1433 | 21346 | 2282  | 207 | 23674 | 1111 | 20649 | 2423 | 206 | 14009 | 819  | 13048 | 1138 |
| 2 | 1 | 2 | 8  | hsa_miR_26a     | mo-miR-26a  | 21458 | 4285 | 21466 | 8162 | 209 | 19286 | 1226 | 17428 | 1823  | 208 | 20199 | 1219 | 18748 | 1835  | 206 | 21364 | 1661 | 15360 | 4267 | 206 | 12423 | 862  | 12883 | 1082 |
| 2 | 1 | 2 | 9  | hsa_miR_26a     | mo-miR-26a  | 29848 | 5471 | 17287 | 8151 | 201 | 26118 | 794  | 21797 | 1199  | 210 | 35124 | 2019 | 23921 | 4108  | 204 | 45992 | 1505 | 24090 | 2398 | 205 | 26495 | 1402 | 20023 | 1541 |
| 2 | 1 | 2 | 10 | hsa_miR_27a     | mo-miR-27a  | 18993 | 2218 | 15824 | 1926 | 206 | 13428 | 1078 | 11023 | 2123  | 211 | 18012 | 4200 | 12777 | 9655  | 203 | 16075 | 835  | 15007 | 1251 | 210 | 13674 | 1634 | 9569  | 1772 |
| 2 | 1 | 2 | 11 | hsa_miR_28      | mo-miR-28   | 6323  | 2326 | 1692  | 2074 | 207 | 2403  | 763  | 1782  | 1137  | 207 | 3358  | 802  | 2668  | 926   | 208 | 3091  | 1333 | 2404  | 1779 | 205 | 2079  | 1220 | 2090  | 1808 |
| 2 | 1 | 2 | 12 | hsa_miR_299_5p  | mo-miR-299  | 4855  | 1636 | 2262  | 1405 | 206 | 3239  | 844  | 2297  | 1062  | 204 | 3920  | 900  | 2865  | 1033  | 203 | 3616  | 906  | 2536  | 1653 | 209 | 3510  | 771  | 2200  | 1321 |
| 2 | 1 | 2 | 13 | mmu_miR_129_3p  | mo-miR-129* | 3648  | 1402 | 1872  | 1749 | 203 | 2424  | 842  | 1722  | 1134  | 205 | 2037  | 1146 | 1444  | 1793  | 209 | 2929  | 661  | 2472  | 939  | 206 | 1985  | 694  | 1610  | 968  |
| 2 | 1 | 2 | 14 | mmu_miR_151     |             | 3272  | 1120 | 1721  | 1463 | 202 | 2277  | 851  | 1448  | 1127  | 200 | 4375  | 1500 | 2406  | 2068  | 193 | 2183  | 622  | 1994  | 885  | 210 | 3888  | 1627 | 1687  | 2318 |
| 2 | 1 | 2 | 15 | mmu_miR_17_3p   |             | 2805  | 877  | 1701  | 1019 | 209 | 1928  | 661  | 1439  | 985   | 206 | 2397  | 961  | 1552  | 1176  | 203 | 2033  | 651  | 1646  | 1051 | 205 | 1880  | 791  | 1625  | 1257 |
| 2 | 1 | 2 | 16 | mmu_miR_199b    |             | 2339  | 764  | 1792  | 1289 | 207 | 2290  | 761  | 1311  | 1051  | 206 | 2335  | 649  | 1898  | 1063  | 210 | 2605  | 634  | 1748  | 925  | 204 | 2792  | 759  | 2406  | 1136 |
| 2 | 1 | 2 | 17 | mmu_miR_202     |             | 2260  | 867  | 1707  | 1071 | 209 | 3310  | 833  | 2708  | 1394  | 207 | 1315  | 619  | 1347  | 1080  | 212 | 2392  | 595  | 2087  | 975  | 208 | 2512  | 684  | 2093  | 1007 |
| 2 | 1 | 2 | 18 | mmu_miR_211     | mo-miR-211  | 2868  | 806  | 4476  | 1098 | 212 | 2922  | 972  | 2653  | 2200  | 212 | 4033  | 1741 | 3529  | 3956  | 209 | 1908  | 480  | 1644  | 805  | 209 | 3907  | 841  | 2337  | 1129 |
| 2 | 1 | 2 | 19 | hsa_miR_508     |             | 5534  | 1400 | 3790  | 1566 | 202 | 1619  | 663  | 1225  | 1062  | 210 | 4546  | 1250 | 4282  | 2604  | 204 | 2208  | 566  | 1513  | 829  | 208 | 3803  | 1101 | 2414  | 1483 |
| 2 | 1 | 2 | 20 | ambi_miR_7036   |             | 1962  | 676  | 1578  | 1063 | 211 | 2239  | 754  | 1285  | 1098  | 204 | 1785  | 643  | 1531  | 1089  | 209 | 1776  | 844  | 1321  | 1647 | 205 | 3911  | 1182 | 2152  | 1432 |
| 2 | 1 | 2 | 21 | ambi_miR_7038_1 |             | 271   |      |       |      |     |       |      |       |       |     |       |      |       |       |     |       |      |       |      |     |       |      |       |      |

|   |   |   |    |                 |             |       |      |       |      |     |       |      |       |      |     |       |      |       |       |     |       |      |       |      |     |       |      |       |      |
|---|---|---|----|-----------------|-------------|-------|------|-------|------|-----|-------|------|-------|------|-----|-------|------|-------|-------|-----|-------|------|-------|------|-----|-------|------|-------|------|
| 2 | 2 | 1 | 1  | Control_2       |             | 2957  | 745  | 2081  | 895  | 207 | 1783  | 534  | 1642  | 752  | 204 | 2778  | 810  | 1925  | 1161  | 207 | 2096  | 435  | 2014  | 654  | 209 | 2644  | 1097 | 1911  | 1692 |
| 2 | 2 | 1 | 2  | Control_4       |             | 3009  | 918  | 1661  | 1157 | 206 | 2038  | 689  | 1251  | 917  | 202 | 1780  | 561  | 1693  | 926   | 210 | 4388  | 1158 | 5880  | 2865 | 212 | 3129  | 938  | 2153  | 1229 |
| 2 | 2 | 1 | 3  | hsa_let_7b      | mo-let-7b   | 24579 | 1228 | 17000 | 1325 | 205 | 24976 | 684  | 17599 | 882  | 206 | 30952 | 763  | 22346 | 1441  | 209 | 18251 | 987  | 16115 | 1566 | 208 | 12601 | 1013 | 20975 | 1445 |
| 2 | 2 | 1 | 4  | hsa_let_7d      | mo-let-7d   | 13843 | 1082 | 12556 | 1689 | 202 | 16144 | 486  | 15466 | 691  | 212 | 17905 | 741  | 13377 | 1174  | 211 | 12451 | 1092 | 10601 | 1755 | 208 | 27068 | 984  | 16147 | 1581 |
| 2 | 2 | 1 | 5  | hsa_let_7i      | mo-let-7i   | 8864  | 927  | 9906  | 1226 | 210 | 7113  | 530  | 7778  | 779  | 207 | 11741 | 674  | 13634 | 1128  | 210 | 5840  | 631  | 7469  | 1191 | 213 | 10809 | 1211 | 11317 | 2245 |
| 2 | 2 | 1 | 6  | hsa_let_7j      | mo-let-7j   | 4492  | 913  | 3253  | 1262 | 204 | 3015  | 373  | 2840  | 803  | 212 | 8642  | 3403 | 10736 | 9699  | 204 | 2379  | 545  | 2346  | 924  | 211 | 4506  | 988  | 3383  | 2543 |
| 2 | 2 | 1 | 7  | hsa_miR_200c    | mo-miR-200c | 4173  | 507  | 3791  | 702  | 211 | 3038  | 574  | 2636  | 936  | 205 | 8616  | 3524 | 9663  | 11641 | 203 | 5157  | 605  | 5563  | 843  | 209 | 4261  | 845  | 3299  | 1192 |
| 2 | 2 | 1 | 8  | hsa_miR_204     | mo-miR-204  | 2094  | 582  | 1712  | 920  | 211 | 4253  | 737  | 4360  | 1078 | 208 | 4797  | 1166 | 3781  | 1468  | 196 | 1583  | 636  | 1308  | 1301 | 209 | 3612  | 1005 | 2759  | 1347 |
| 2 | 2 | 1 | 9  | hsa_miR_206     | mo-miR-206  | 4063  | 809  | 5084  | 1102 | 209 | 1899  | 742  | 1061  | 979  | 199 | 3483  | 734  | 3357  | 1180  | 210 | 1697  | 591  | 1452  | 1189 | 207 | 3801  | 995  | 3117  | 1358 |
| 2 | 2 | 1 | 10 | hsa_miR_21      | mo-miR-21   | 9603  | 931  | 8556  | 1596 | 207 | 10898 | 737  | 10803 | 916  | 207 | 8482  | 686  | 7839  | 1065  | 208 | 4740  | 518  | 4702  | 917  | 210 | 5910  | 877  | 5311  | 1200 |
| 2 | 2 | 1 | 11 | hsa_miR_211     |             | 4729  | 896  | 4850  | 1600 | 208 | 5285  | 807  | 6627  | 1233 | 209 | 5463  | 759  | 5845  | 1124  | 207 | 3032  | 542  | 3737  | 958  | 211 | 3796  | 1100 | 2680  | 1382 |
| 2 | 2 | 1 | 12 | hsa_miR_213     | mo-miR-213  | 1932  | 703  | 1342  | 1156 | 208 | 3279  | 584  | 4246  | 1137 | 210 | 3413  | 840  | 2728  | 1219  | 207 | 2470  | 546  | 2286  | 773  | 211 | 3742  | 1108 | 2018  | 1500 |
| 2 | 2 | 1 | 13 | hsa_miR_384     |             | 2915  | 1036 | 1948  | 1326 | 207 | 1657  | 390  | 1684  | 792  | 210 | 2564  | 852  | 1566  | 1193  | 206 | 1740  | 689  | 1674  | 1259 | 212 | 2950  | 1122 | 1869  | 1746 |
| 2 | 2 | 1 | 14 | hsa_miR_422b    |             | 2908  | 1109 | 1999  | 1843 | 207 | 2735  | 587  | 2219  | 844  | 210 | 3772  | 801  | 2724  | 1012  | 207 | 3786  | 988  | 2997  | 1521 | 206 | 2360  | 607  | 2368  | 1007 |
| 2 | 2 | 1 | 15 | hsa_miR_424     |             | 2819  | 962  | 1693  | 1279 | 204 | 2141  | 663  | 1344  | 895  | 207 | 2202  | 613  | 1446  | 940   | 205 | 2022  | 978  | 1438  | 1655 | 208 | 2210  | 877  | 1652  | 1362 |
| 2 | 2 | 1 | 16 | hsa_miR_429     |             | 2561  | 907  | 1701  | 1102 | 200 | 1433  | 627  | 1208  | 1217 | 211 | 2121  | 772  | 1254  | 1067  | 206 | 2114  | 576  | 1557  | 969  | 206 | 2632  | 939  | 2240  | 1518 |
| 2 | 2 | 1 | 17 | hsa_miR_449     | mo-miR-449  | 3206  | 1071 | 1286  | 1206 | 202 | 1942  | 557  | 1524  | 912  | 209 | 2404  | 852  | 1440  | 1249  | 204 | 2242  | 604  | 1963  | 883  | 203 | 3390  | 1037 | 2015  | 1616 |
| 2 | 2 | 1 | 18 | hsa_miR_7       |             | 2028  | 702  | 1497  | 1040 | 209 | 1837  | 731  | 1225  | 1258 | 206 | 2174  | 690  | 1598  | 1238  | 212 | 2133  | 751  | 1408  | 1411 | 205 | 3500  | 1438 | 1416  | 1702 |
| 2 | 2 | 1 | 19 | hsa_miR_520d    |             | 2478  | 736  | 1660  | 981  | 207 | 2149  | 731  | 1146  | 962  | 197 | 1672  | 651  | 1223  | 1000  | 210 | 1934  | 590  | 1608  | 787  | 207 | 3122  | 1419 | 1608  | 1748 |
| 2 | 2 | 1 | 20 | hsa_miR_517a    |             | 2144  | 966  | 1341  | 1425 | 205 | 2090  | 866  | 1215  | 1124 | 209 | 1738  | 767  | 1190  | 943   | 205 | 3318  | 2762 | 2217  | 9484 | 198 | 3279  | 1285 | 1570  | 1626 |
| 2 | 2 | 1 | 21 | hsa_miR_521     |             | 2207  | 1046 | 1875  | 1770 | 209 | 1719  | 906  | 1129  | 1833 | 207 | 2553  | 798  | 1621  | 983   | 201 | 2737  | 2509 | 1564  | 8898 | 205 | 1855  | 653  | 1663  | 1193 |
| 2 | 2 | 1 | 22 | hsa_miR_518f    |             | 2075  | 896  | 1478  | 1328 | 206 | 1688  | 538  | 1110  | 829  | 207 | 1924  | 1025 | 1413  | 1695  | 207 | 1825  | 679  | 1600  | 1304 | 209 | 1868  | 825  | 1581  | 1426 |
| 2 | 2 | 1 | 23 | hsa_miR_518b    |             | 2139  | 776  | 1224  | 1272 | 209 | 1469  | 519  | 1077  | 780  | 209 | 2015  | 705  | 1582  | 1143  | 208 | 1962  | 680  | 3597  | 1184 | 208 | 2806  | 883  | 1483  | 1512 |
| 2 | 2 | 1 | 24 | hsa_miR_525_AS  |             | 2145  | 746  | 1602  | 1105 | 209 | 1543  | 540  | 1198  | 782  | 209 | 2140  | 727  | 1799  | 1082  | 205 | 1882  | 608  | 4574  | 981  | 209 | 2631  | 924  | 2057  | 1144 |
| 2 | 2 | 2 | 1  | hsa_miR_125b    | mo-miR-125b | 4892  | 624  | 4246  | 984  | 211 | 4786  | 650  | 3660  | 1037 | 207 | 5801  | 686  | 4119  | 922   | 207 | 3408  | 644  | 2733  | 910  | 207 | 6131  | 1227 | 4545  | 1644 |
| 2 | 2 | 2 | 2  | hsa_miR_126_AS  | mo-miR-126* | 2224  | 910  | 1446  | 1348 | 204 | 1820  | 490  | 1440  | 699  | 207 | 2592  | 671  | 1780  | 966   | 209 | 5540  | 1930 | 4547  | 3444 | 202 | 2614  | 792  | 2057  | 1111 |
| 2 | 2 | 2 | 3  | hsa_miR_128a    | mo-miR-128a | 5767  | 735  | 6985  | 1035 | 212 | 5338  | 490  | 6905  | 763  | 212 | 2049  | 581  | 1634  | 951   | 207 | 1908  | 1015 | 1374  | 1601 | 206 | 6164  | 1322 | 6062  | 1804 |
| 2 | 2 | 2 | 4  | hsa_miR_130a    | mo-miR-130a | 6188  | 1183 | 6624  | 1668 | 210 | 4315  | 515  | 4409  | 909  | 213 | 4150  | 750  | 3888  | 1249  | 209 | 5408  | 852  | 4687  | 1159 | 204 | 6548  | 2298 | 4668  | 4492 |
| 2 | 2 | 2 | 5  | hsa_miR_132     | mo-miR-132  | 6023  | 836  | 5955  | 909  | 206 | 1907  | 358  | 1797  | 644  | 208 | 2910  | 1009 | 2164  | 1410  | 210 | 2032  | 797  | 1371  | 1148 | 206 | 4993  | 1574 | 2964  | 3262 |
| 2 | 2 | 2 | 6  | hsa_miR_134     | mo-miR-134  | 2766  | 740  | 1802  | 910  | 209 | 1367  | 435  | 1474  | 819  | 210 | 2717  | 1024 | 1851  | 1452  | 202 | 2053  | 626  | 1921  | 1119 | 208 | 3916  | 1134 | 4329  | 1829 |
| 2 | 2 | 2 | 7  | hsa_miR_23b     | mo-miR-23b  | 18154 | 1019 | 16754 | 1248 | 207 | 14388 | 1730 | 11963 | 3809 | 206 | 17120 | 2021 | 15050 | 4368  | 210 | 12868 | 427  | 14919 | 720  | 210 | 14429 | 971  | 11337 | 1286 |
| 2 | 2 | 2 | 8  | hsa_miR_25      | mo-miR-25   | 6834  | 775  | 8667  | 1133 | 209 | 6203  | 1643 | 5898  | 3264 | 202 | 7275  | 1042 | 8713  | 1451  | 210 | 3075  | 975  | 2034  | 1668 | 207 | 6390  | 1019 | 5705  | 1045 |
| 2 | 2 | 2 | 9  | hsa_miR_26b     | mo-miR-26b  | 6197  | 703  | 6282  | 1155 | 205 | 3576  | 769  | 3236  | 1034 | 209 | 6192  | 689  | 6117  | 1294  | 212 | 3656  | 870  | 3152  | 1293 | 205 | 3656  | 1741 | 4642  | 2610 |
| 2 | 2 | 2 | 10 | hsa_miR_27b     | mo-miR-27b  | 7969  | 721  | 7082  | 976  | 210 | 6260  | 621  | 5670  | 868  | 207 | 8517  | 775  | 7877  | 1277  | 212 | 7062  | 810  | 8792  | 1379 | 209 | 7983  | 1619 | 6253  | 2484 |
| 2 | 2 | 2 | 11 | hsa_miR_296     | mo-miR-296  | 2496  | 694  | 3214  | 1190 | 212 | 2884  | 954  | 2003  | 1557 | 203 | 2365  | 578  | 2683  | 1040  | 210 | 2341  | 699  | 1709  | 892  | 203 | 2901  | 1626 | 2188  | 1781 |
| 2 | 2 | 2 | 12 | hsa_miR_29a     | mo-miR-29a  | 8344  | 1160 | 7166  | 1458 | 198 | 7699  | 1030 | 6301  | 1834 | 205 | 7213  | 719  | 5377  | 995   | 205 | 6379  | 783  | 6186  | 1011 | 210 | 5137  | 968  | 4999  | 1857 |
| 2 | 2 | 2 | 13 | mmu_miR_140_AS  |             | 2508  | 758  | 2541  | 1239 | 212 | 1907  | 576  | 1946  | 1114 | 213 | 3006  | 625  | 2332  | 760   | 210 | 2288  | 806  | 1454  | 1104 | 205 | 2857  | 656  | 2210  | 840  |
| 2 | 2 | 2 | 14 | mmu_miR_155     |             | 3659  | 1011 | 2259  | 1328 | 201 | 2365  | 792  | 1772  | 1073 | 204 | 2542  | 729  | 1888  | 1032  | 205 | 1792  | 795  | 1367  | 1363 | 211 | 2714  | 918  | 2433  | 1326 |
| 2 | 2 | 2 | 15 | mmu_miR_192     |             | 2973  | 1033 | 1292  | 1340 | 194 | 1520  | 672  | 1244  | 1071 | 212 | 2223  | 931  | 1506  | 1609  | 206 | 1870  | 811  | 1506  | 1368 | 212 | 3266  | 1133 | 1713  | 1531 |
| 2 | 2 | 2 | 16 | mmu_miR_201     |             | 2426  | 965  | 1548  | 1388 | 205 | 2119  | 1003 | 1608  | 1434 | 199 | 1827  | 769  | 1313  | 1450  | 207 | 1259  | 619  | 1236  | 1250 | 209 | 2780  | 1003 | 1740  | 1332 |
| 2 | 2 | 2 | 17 | mmu_miR_207     |             | 2346  | 866  | 1520  | 1144 | 208 | 1495  | 446  | 1171  | 670  | 202 | 2849  | 1049 | 1436  | 1569  | 198 | 1344  | 660  | 1495  | 1321 | 210 | 2967  | 1005 | 1765  | 1463 |
| 2 | 2 | 2 | 18 | mmu_miR_215     |             | 2391  | 902  | 1347  | 1059 | 200 | 1486  | 748  | 1255  | 1587 | 209 | 1746  | 625  | 1297  | 1027  | 208 | 1840  | 658  | 1410  | 1082 | 207 | 3202  | 1212 | 1994  | 1714 |
| 2 | 2 | 2 | 19 | hsa_miR_507     |             | 2334  | 962  | 1489  | 1269 | 211 | 1947  | 740  | 1217  | 1017 | 206 | 1950  | 666  | 1536  | 970   | 208 | 1679  | 656  | 1537  | 1200 | 209 | 3454  | 1135 | 3900  | 1365 |
| 2 | 2 | 2 | 20 | hsa_miR_193b    |             | 2122  | 482  | 1707  | 711  | 212 | 1446  | 508  | 1205  | 787  | 211 | 2086  | 642  | 1465  | 799   | 208 | 2222  | 786  | 2793  | 1166 | 209 | 2514  | 1015 | 1639  | 1597 |
| 2 | 2 | 2 | 21 | ambi_miR_7039   |             | 2058  | 551  | 1485  | 740  | 207 | 1925  | 850  | 1038  | 1246 | 205 | 1744  | 567  | 1305  | 987   | 210 | 2149  | 795  | 1906  | 1182 | 207 | 3005  | 1098 | 1946  | 1449 |
| 2 | 2 | 2 | 22 | hsa_miR_518c    |             | 2050  | 787  | 1301  | 1133 | 206 | 1582  | 587  | 1172  | 903  | 207 | 2436  | 996  | 1529  | 1835  | 203 | 1910  | 643  | 1811  | 1187 | 211 | 2979  | 1291 | 1677  | 2152 |
| 2 | 2 | 2 | 23 | hsa_miR_518f_AS |             | 2220  | 805  | 1281  | 1070 | 207 | 1659  | 391  | 1795  | 644  | 209 | 2164  | 1055 | 1422  | 1849  | 209 | 2160  | 605  | 1858  | 871  | 209 | 3531  | 1151 | 1818  | 1708 |
| 2 | 2 | 2 | 24 | hsa_miR_526c    |             | 2524  | 964  | 1412  | 1261 | 208 | 2309  | 595  | 1242  | 699  | 203 | 2191  | 894  | 1211  | 1179  | 206 | 1975  | 489  | 1575  | 6    |     |       |      |       |      |



|   |   |   |    |                 |             |       |      |       |       |     |       |      |       |      |     |       |      |       |       |     |       |      |       |      |     |       |      |       |      |
|---|---|---|----|-----------------|-------------|-------|------|-------|-------|-----|-------|------|-------|------|-----|-------|------|-------|-------|-----|-------|------|-------|------|-----|-------|------|-------|------|
| 3 | 1 | 1 | 4  | hsa_let_7c      | mo-let-7c   | 27008 | 909  | 20007 | 1260  | 206 | 37277 | 825  | 24153 | 1248 | 209 | 39941 | 3514 | 24506 | 10892 | 208 | 29036 | 1164 | 22454 | 1592 | 209 | 30679 | 1118 | 22195 | 2182 |
| 3 | 1 | 1 | 5  | hsa_let_7e      | mo-let-7e   | 10379 | 1179 | 11282 | 1656  | 209 | 15008 | 716  | 13718 | 1099 | 206 | 21570 | 1490 | 18823 | 2739  | 213 | 15788 | 1133 | 12614 | 2591 | 207 | 18148 | 2397 | 16307 | 2701 |
| 3 | 1 | 1 | 6  | hsa_let_7g      |             | 10596 | 1265 | 12824 | 1876  | 213 | 4179  | 507  | 3424  | 783  | 210 | 20732 | 2210 | 16547 | 3756  | 205 | 6710  | 604  | 6469  | 1019 | 213 | 17111 | 1964 | 15163 | 2517 |
| 3 | 1 | 1 | 7  | Control_1       |             | 6199  | 1853 | 3213  | 1970  | 204 | 2307  | 606  | 3088  | 994  | 207 | 7706  | 492  | 10790 | 792   | 211 | 15919 | 875  | 13442 | 1381 | 210 | 13817 | 1842 | 10691 | 1926 |
| 3 | 1 | 1 | 8  | hsa_miR_203     | mo-miR-203  | 10285 | 2205 | 8058  | 1955  | 206 | 2229  | 548  | 1972  | 985  | 211 | 2988  | 905  | 1955  | 1104  | 206 | 2310  | 736  | 1672  | 1207 | 212 | 4072  | 1538 | 2231  | 1825 |
| 3 | 1 | 1 | 9  | hsa_miR_205     | mo-miR-205  | 4708  | 1646 | 2178  | 1576  | 202 | 1735  | 469  | 1463  | 948  | 209 | 2052  | 860  | 1880  | 1117  | 206 | 2506  | 911  | 1855  | 1892 | 204 | 3684  | 1276 | 2026  | 1627 |
| 3 | 1 | 1 | 10 | hsa_miR_208     | mo-miR-208  | 3545  | 1373 | 1445  | 1592  | 207 | 1765  | 713  | 1457  | 1065 | 205 | 2399  | 650  | 1612  | 809   | 204 | 2036  | 850  | 1538  | 1564 | 210 | 3607  | 1185 | 2129  | 1479 |
| 3 | 1 | 1 | 11 | hsa_miR_210     | mo-miR-210  | 3203  | 1028 | 2025  | 1272  | 209 | 3192  | 684  | 3232  | 1000 | 209 | 2913  | 685  | 1998  | 895   | 210 | 4418  | 735  | 3492  | 1099 | 208 | 3087  | 1159 | 1844  | 1995 |
| 3 | 1 | 1 | 12 | hsa_miR_212     | mo-miR-212  | 2895  | 1265 | 1389  | 1611  | 209 | 3369  | 436  | 3525  | 920  | 210 | 2854  | 897  | 1850  | 1104  | 210 | 5211  | 616  | 5554  | 906  | 207 | 3647  | 1322 | 2210  | 1917 |
| 3 | 1 | 1 | 13 | Control_1       |             | 5952  | 1034 | 5192  | 1446  | 211 | 8419  | 802  | 5673  | 980  | 206 | 13278 | 742  | 12187 | 1297  | 210 | 11091 | 888  | 9511  | 1245 | 209 | 9131  | 1537 | 6541  | 1950 |
| 3 | 1 | 1 | 14 | hsa_miR_422a    |             | 3828  | 965  | 3402  | 1301  | 209 | 2624  | 381  | 2636  | 886  | 208 | 6776  | 975  | 6625  | 1567  | 206 | 3213  | 874  | 2587  | 893  | 206 | 5837  | 1363 | 4821  | 1819 |
| 3 | 1 | 1 | 15 | hsa_miR_423     |             | 2678  | 1165 | 1970  | 1619  | 206 | 1646  | 615  | 1133  | 949  | 207 | 2668  | 762  | 1751  | 1166  | 206 | 1991  | 571  | 2116  | 1020 | 209 | 3724  | 1222 | 2110  | 1355 |
| 3 | 1 | 1 | 16 | hsa_miR_425     |             | 2089  | 1108 | 1580  | 1738  | 207 | 1466  | 493  | 1175  | 803  | 205 | 2716  | 762  | 1869  | 1085  | 209 | 2595  | 1094 | 1566  | 1788 | 202 | 2898  | 1231 | 1628  | 1508 |
| 3 | 1 | 1 | 17 | hsa_miR_448     | mo-miR-448  | 2868  | 1195 | 2048  | 1797  | 206 | 3489  | 589  | 3110  | 1202 | 210 | 2912  | 942  | 1469  | 1113  | 201 | 2086  | 763  | 1631  | 1113 | 205 | 6774  | 1399 | 4757  | 1453 |
| 3 | 1 | 1 | 18 | hsa_miR_450     |             | 3221  | 1381 | 1937  | 1931  | 196 | 3413  | 822  | 2890  | 1594 | 206 | 2618  | 124  | 1984  | 968   | 209 | 1992  | 594  | 1683  | 936  | 210 | 6070  | 1998 | 5710  | 4023 |
| 3 | 1 | 1 | 19 | Control_1       |             | 6717  | 899  | 5222  | 1143  | 206 | 7566  | 433  | 6408  | 696  | 210 | 10239 | 902  | 8300  | 1328  | 206 | 10018 | 1308 | 8628  | 2038 | 205 | 7629  | 3006 | 6586  | 1492 |
| 3 | 1 | 1 | 20 | hsa_miR_520h    |             | 2436  | 803  | 1742  | 1116  | 212 | 1212  | 386  | 1082  | 653  | 212 | 1905  | 680  | 1587  | 1079  | 209 | 5652  | 737  | 2678  | 1124 | 210 | 3545  | 1242 | 2632  | 1813 |
| 3 | 1 | 1 | 21 | hsa_miR_518e    |             | 2958  | 1142 | 1824  | 1407  | 208 | 1109  | 550  | 1209  | 1201 | 210 | 1927  | 735  | 1644  | 1204  | 207 | 1995  | 735  | 1384  | 1117 | 206 | 2713  | 993  | 1580  | 1427 |
| 3 | 1 | 1 | 22 | hsa_miR_523     |             | 1951  | 750  | 1400  | 1110  | 210 | 2131  | 692  | 1464  | 1186 | 204 | 2002  | 847  | 1221  | 1269  | 210 | 2765  | 927  | 1855  | 1279 | 206 | 2719  | 940  | 1941  | 1610 |
| 3 | 1 | 1 | 23 | hsa_miR_518c    |             | 1766  | 769  | 1439  | 1408  | 210 | 2020  | 604  | 1464  | 1108 | 206 | 1952  | 517  | 1554  | 857   | 209 | 1850  | 802  | 1488  | 1214 | 207 | 2432  | 864  | 2279  | 1399 |
| 3 | 1 | 1 | 24 | hsa_miR_518d    |             | 2682  | 1004 | 1880  | 1390  | 208 | 1268  | 389  | 1134  | 883  | 211 | 2582  | 948  | 1834  | 1217  | 204 | 1709  | 636  | 1531  | 986  | 210 | 2208  | 640  | 4338  | 1029 |
| 3 | 1 | 2 | 1  | hsa_miR_125a    | mo-miR-125a | 14735 | 2422 | 11641 | 2732  | 197 | 9783  | 885  | 8362  | 1231 | 207 | 9551  | 896  | 6844  | 1603  | 205 | 8843  | 981  | 7168  | 1411 | 208 | 13721 | 2526 | 11251 | 8123 |
| 3 | 1 | 2 | 2  | hsa_miR_126     | mo-miR-126  | 21865 | 1583 | 18483 | 1612  | 209 | 29721 | 3155 | 21323 | 6306 | 211 | 34196 | 2641 | 23769 | 8674  | 209 | 31477 | 874  | 24081 | 1102 | 211 | 25332 | 1778 | 20063 | 2104 |
| 3 | 1 | 2 | 3  | hsa_miR_127     | mo-miR-127  | 8650  | 2987 | 5889  | 6002  | 199 | 2208  | 857  | 1860  | 1540 | 204 | 13650 | 6460 | 13623 | 14685 | 201 | 8613  | 2506 | 7007  | 3504 | 197 | 6086  | 1827 | 3927  | 2019 |
| 3 | 1 | 2 | 4  | hsa_miR_129     |             | 8843  | 4902 | 9303  | 11379 | 206 | 1800  | 571  | 1668  | 969  | 210 | 4443  | 3839 | 2430  | 8656  | 204 | 6902  | 1471 | 5410  | 1892 | 207 | 4958  | 1021 | 4049  | 1592 |
| 3 | 1 | 2 | 5  | hsa_miR_130b    | mo-miR-130b | 6949  | 3946 | 6307  | 8840  | 212 | 2487  | 837  | 1824  | 1141 | 207 | 3759  | 1263 | 2406  | 1675  | 205 | 2707  | 874  | 1742  | 1092 | 207 | 6337  | 1998 | 5340  | 4309 |
| 3 | 1 | 2 | 6  | hsa_miR_133a    | mo-miR-133a | 7039  | 2011 | 5932  | 3245  | 203 | 11710 | 651  | 12418 | 858  | 205 | 3767  | 1389 | 2489  | 2112  | 206 | 1934  | 695  | 1571  | 1014 | 203 | 6712  | 2126 | 4791  | 4248 |
| 3 | 1 | 2 | 7  | hsa_miR_230a    | mo-miR-230a | 15901 | 1571 | 14807 | 1796  | 205 | 19856 | 596  | 19448 | 837  | 210 | 27367 | 1500 | 22564 | 2043  | 206 | 24101 | 911  | 21181 | 1486 | 209 | 15206 | 880  | 13418 | 9249 |
| 3 | 1 | 2 | 8  | hsa_miR_24      | mo-miR-24   | 17461 | 1050 | 16980 | 1396  | 210 | 20183 | 820  | 16638 | 1017 | 208 | 20500 | 1411 | 16683 | 2292  | 209 | 13094 | 944  | 12392 | 1670 | 211 | 16924 | 1468 | 15112 | 1604 |
| 3 | 1 | 2 | 9  | hsa_miR_26a     | mo-miR-26a  | 26203 | 2112 | 21061 | 7192  | 207 | 28793 | 652  | 23228 | 1055 | 209 | 33087 | 803  | 25526 | 1138  | 208 | 41957 | 1323 | 20252 | 1373 | 202 | 31833 | 1232 | 23211 | 1639 |
| 3 | 1 | 2 | 10 | hsa_miR_27a     | mo-miR-27a  | 16027 | 1479 | 15075 | 1806  | 202 | 19877 | 1825 | 19410 | 5309 | 208 | 21335 | 848  | 19054 | 1300  | 210 | 21047 | 833  | 19252 | 1176 | 206 | 19799 | 1412 | 16260 | 1523 |
| 3 | 1 | 2 | 11 | hsa_miR_28      | mo-miR-28   | 5821  | 1236 | 4403  | 1622  | 206 | 5546  | 2197 | 6244  | 6349 | 208 | 3055  | 970  | 1830  | 1130  | 203 | 3194  | 1003 | 1837  | 1367 | 204 | 3339  | 1296 | 1885  | 1991 |
| 3 | 1 | 2 | 12 | hsa_miR_299_5p  | mo-miR-299  | 3011  | 1206 | 1465  | 1661  | 204 | 3108  | 468  | 3406  | 759  | 212 | 2659  | 775  | 2325  | 1049  | 208 | 1987  | 726  | 1384  | 1083 | 210 | 3124  | 1155 | 1802  | 1616 |
| 3 | 1 | 2 | 13 | mmu_miR_129_3p  | mo-miR-129* | 3806  | 1451 | 2753  | 2258  | 208 | 2032  | 593  | 1916  | 987  | 210 | 2217  | 628  | 1933  | 1140  | 213 | 2035  | 863  | 1537  | 1734 | 208 | 2957  | 1236 | 1607  | 1611 |
| 3 | 1 | 2 | 14 | mmu_miR_151     |             | 4796  | 1338 | 3432  | 1628  | 207 | 1718  | 499  | 1503  | 830  | 209 | 2343  | 970  | 1808  | 2069  | 207 | 2245  | 621  | 1814  | 1535 | 210 | 2499  | 626  | 2062  | 995  |
| 3 | 1 | 2 | 15 | mmu_miR_17_3p   |             | 2976  | 1086 | 1360  | 1216  | 203 | 1195  | 414  | 1294  | 837  | 209 | 1989  | 528  | 1526  | 803   | 210 | 1850  | 671  | 1631  | 1198 | 207 | 2563  | 920  | 1725  | 1339 |
| 3 | 1 | 2 | 16 | mmu_miR_199b    |             | 3155  | 929  | 1595  | 1180  | 206 | 2965  | 400  | 3310  | 713  | 211 | 2880  | 1164 | 2164  | 885   | 207 | 5229  | 1217 | 9865  | 1820 | 211 | 310   | 1218 | 2265  | 1641 |
| 3 | 1 | 2 | 17 | mmu_miR_202     |             | 2314  | 782  | 1605  | 1183  | 207 | 3325  | 590  | 3160  | 1280 | 211 | 5125  | 1407 | 3745  | 1801  | 196 | 2238  | 684  | 1449  | 1086 | 201 | 2696  | 839  | 2042  | 1298 |
| 3 | 1 | 2 | 18 | mmu_miR_211     |             | 3592  | 1253 | 1416  | 1505  | 203 | 3449  | 628  | 3066  | 934  | 210 | 5409  | 703  | 4201  | 876   | 203 | 2502  | 698  | 2110  | 1242 | 206 | 3134  | 956  | 1956  | 1380 |
| 3 | 1 | 2 | 19 | hsa_miR_508     | mo-miR-508  | 4297  | 1864 | 2978  | 4107  | 207 | 1103  | 534  | 1143  | 956  | 213 | 5270  | 737  | 4302  | 1290  | 210 | 4241  | 914  | 5311  | 1690 | 209 | 2633  | 955  | 2240  | 1335 |
| 3 | 1 | 2 | 20 | ambi_miR_7036   | mo-miR-211  | 4660  | 1925 | 3417  | 4171  | 204 | 2389  | 971  | 1382  | 1053 | 194 | 1998  | 681  | 1676  | 1017  | 208 | 6645  | 915  | 4999  | 1333 | 205 | 2813  | 1327 | 1837  | 2024 |
| 3 | 1 | 2 | 21 | ambi_miR_7038_1 |             | 2808  | 860  | 6220  | 1224  | 211 | 2352  | 863  | 4575  | 1125 | 204 | 2218  | 743  | 1705  | 1132  | 207 | 2012  | 856  | 1634  | 1307 | 207 | 2300  | 840  | 1695  | 1352 |
| 3 | 1 | 2 | 22 | hsa_miR_488     |             | 2257  | 797  | 1681  | 1103  | 206 | 2290  | 952  | 1137  | 1137 | 197 | 2177  | 936  | 1493  | 1245  | 201 | 1562  | 573  | 1919  | 1151 | 212 | 1966  | 659  | 1057  | 1068 |
| 3 | 1 | 2 | 23 | hsa_miR_517_AS  |             | 2112  | 742  | 1228  | 1031  | 207 | 1185  | 448  | 1200  | 967  | 210 | 1946  | 935  | 1413  | 1405  | 208 | 2304  | 880  | 1211  | 1135 | 208 | 1925  | 480  | 1731  | 907  |
| 3 | 1 | 2 | 24 | hsa_miR_518c_AS |             | 3015  | 902  | 1757  | 1014  | 203 | 1636  | 530  | 1352  | 850  | 208 | 1805  | 692  | 1416  | 1048  | 205 | 1814  | 453  | 1541  | 748  | 211 | 2853  | 784  | 1848  | 1055 |
| 3 | 1 | 3 | 1  | hsa_miR_145     | mo-miR-145  | 9063  | 1885 | 9060  | 1977  | 201 | 5902  | 739  | 5811  | 970  | 211 | 7981  | 954  | 6961  | 1082  | 209 | 9354  | 1078 | 8006  | 1217 | 209 | 8643  | 1387 | 8181  | 1617 |
| 3 | 1 | 3 | 2  | hsa_miR_147     |             | 8707  | 1771 | 7081  | 1983  | 196 | 2057  | 811  | 1689  | 1382 | 207 | 4308  | 1093 | 3156  | 1397  | 209 | 3044  | 1232 | 1821  | 1992 | 204 | 6188  | 1100 | 4899  | 1343 |
| 3 | 1 | 3 | 3  | hsa_miR_148b    | mo-miR-148b | 8526  |      |       |       |     |       |      |       |      |     |       |      |       |       |     |       |      |       |      |     |       |      |       |      |

|   |   |   |    |                 |             |       |      |       |      |     |       |     |       |      |     |       |      |       |      |     |       |      |       |      |     |       |      |       |      |
|---|---|---|----|-----------------|-------------|-------|------|-------|------|-----|-------|-----|-------|------|-----|-------|------|-------|------|-----|-------|------|-------|------|-----|-------|------|-------|------|
| 3 | 2 | 1 | 7  | hsa_miR_200c    | mo-miR-200c | 8492  | 745  | 8214  | 1208 | 209 | 6264  | 762 | 5423  | 1143 | 205 | 6512  | 694  | 6168  | 1231 | 207 | 4172  | 555  | 4358  | 1114 | 212 | 5847  | 1053 | 5936  | 1595 |
| 3 | 2 | 1 | 8  | hsa_miR_204     | mo-miR-204  | 4285  | 1263 | 3341  | 1940 | 203 | 3501  | 554 | 4187  | 792  | 209 | 1551  | 595  | 1347  | 975  | 209 | 3927  | 1505 | 1904  | 1622 | 200 | 2700  | 864  | 1769  | 1221 |
| 3 | 2 | 1 | 9  | hsa_miR_206     | mo-miR-206  | 4516  | 1077 | 5184  | 1254 | 211 | 5105  | 415 | 6727  | 519  | 208 | 4205  | 969  | 5424  | 1310 | 203 | 3092  | 1312 | 1867  | 2101 | 204 | 3858  | 936  | 3470  | 1394 |
| 3 | 2 | 1 | 10 | hsa_miR_21      | mo-miR-21   | 11364 | 899  | 11919 | 1383 | 209 | 10058 | 591 | 9648  | 885  | 211 | 12408 | 578  | 11675 | 811  | 205 | 4755  | 513  | 5445  | 990  | 211 | 7853  | 1070 | 6301  | 1662 |
| 3 | 2 | 1 | 11 | hsa_miR_211     |             | 5248  | 953  | 5251  | 1274 | 206 | 11458 | 506 | 1047  | 755  | 208 | 5100  | 793  | 5760  | 1510 | 211 | 3447  | 550  | 3863  | 894  | 211 | 3206  | 1113 | 1875  | 1425 |
| 3 | 2 | 1 | 12 | hsa_miR_213     | mo-miR-213  | 2418  | 1090 | 1551  | 1835 | 205 | 1144  | 430 | 1218  | 764  | 209 | 1720  | 727  | 1575  | 1090 | 210 | 2745  | 610  | 2914  | 1325 | 210 | 2500  | 1418 | 1291  | 1507 |
| 3 | 2 | 1 | 13 | hsa_miR_384     |             | 2232  | 1035 | 1230  | 1369 | 210 | 2171  | 490 | 2462  | 955  | 210 | 2616  | 1004 | 1887  | 1332 | 207 | 1737  | 559  | 1899  | 863  | 209 | 2964  | 1116 | 2015  | 1361 |
| 3 | 2 | 1 | 14 | hsa_miR_422b    |             | 3586  | 759  | 2787  | 1102 | 210 | 3058  | 527 | 2974  | 888  | 212 | 3279  | 770  | 2583  | 1235 | 209 | 3130  | 733  | 3025  | 1251 | 208 | 4061  | 1221 | 2752  | 1429 |
| 3 | 2 | 1 | 15 | hsa_miR_424     |             | 3431  | 939  | 2263  | 1212 | 207 | 1829  | 435 | 1684  | 734  | 206 | 2216  | 1009 | 1307  | 1291 | 206 | 2344  | 1006 | 1704  | 1620 | 205 | 3262  | 1067 | 1754  | 1333 |
| 3 | 2 | 1 | 16 | hsa_miR_429     |             | 4614  | 1860 | 1712  | 1782 | 209 | 1510  | 478 | 1250  | 717  | 204 | 2169  | 842  | 1378  | 1389 | 206 | 1368  | 537  | 1231  | 982  | 210 | 3118  | 1475 | 1554  | 1960 |
| 3 | 2 | 1 | 17 | hsa_miR_449     | mo-miR-449  | 3207  | 1388 | 1568  | 1743 | 208 | 1459  | 363 | 3412  | 700  | 207 | 2361  | 894  | 1429  | 1285 | 203 | 1975  | 716  | 1525  | 970  | 207 | 2822  | 1145 | 1577  | 1362 |
| 3 | 2 | 1 | 18 | hsa_miR_7       |             | 2569  | 721  | 2132  | 1026 | 211 | 1303  | 764 | 1070  | 1325 | 207 | 2466  | 1065 | 1887  | 1500 | 210 | 2392  | 771  | 1617  | 1126 | 205 | 4481  | 764  | 2069  | 1092 |
| 3 | 2 | 1 | 19 | hsa_miR_520d    |             | 3076  | 1067 | 1507  | 1172 | 199 | 1582  | 549 | 1122  | 690  | 208 | 1573  | 740  | 1219  | 1189 | 207 | 1661  | 534  | 1385  | 846  | 207 | 2808  | 1074 | 1550  | 1433 |
| 3 | 2 | 1 | 20 | hsa_miR_517a    |             | 2238  | 746  | 3631  | 1226 | 207 | 1338  | 808 | 1017  | 1307 | 209 | 2033  | 846  | 1400  | 1234 | 206 | 2344  | 780  | 1762  | 1124 | 204 | 3024  | 1287 | 1571  | 1952 |
| 3 | 2 | 1 | 21 | hsa_miR_521     |             | 2243  | 802  | 1643  | 1160 | 206 | 1312  | 556 | 1130  | 1120 | 210 | 2763  | 1026 | 1425  | 1329 | 193 | 2218  | 908  | 1534  | 1441 | 203 | 2478  | 869  | 1820  | 1270 |
| 3 | 2 | 1 | 22 | hsa_miR_518f    |             | 2301  | 754  | 4347  | 1241 | 207 | 1587  | 559 | 1110  | 852  | 208 | 1742  | 690  | 1619  | 1091 | 211 | 2550  | 832  | 4364  | 1267 | 205 | 2472  | 865  | 3007  | 1270 |
| 3 | 2 | 1 | 23 | hsa_miR_518b    |             | 2038  | 838  | 1292  | 1073 | 207 | 2053  | 503 | 1122  | 675  | 199 | 2464  | 799  | 1612  | 974  | 205 | 1797  | 598  | 1399  | 986  | 205 | 2428  | 1269 | 1817  | 2399 |
| 3 | 2 | 1 | 24 | hsa_miR_525_AS  |             | 3050  | 880  | 5443  | 1369 | 209 | 1279  | 437 | 1183  | 847  | 209 | 1990  | 842  | 1458  | 1140 | 208 | 2119  | 496  | 1941  | 852  | 207 | 2125  | 836  | 1935  | 1755 |
| 3 | 2 | 2 | 1  | hsa_miR_125b    | mo-miR-125b | 5001  | 979  | 3928  | 1275 | 207 | 4586  | 936 | 3523  | 1192 | 206 | 6298  | 851  | 5037  | 1417 | 210 | 3074  | 523  | 3001  | 875  | 209 | 4284  | 591  | 3460  | 990  |
| 3 | 2 | 2 | 2  | hsa_miR_126_AS  | mo-miR-126* | 2398  | 808  | 1700  | 1274 | 210 | 2395  | 884 | 1434  | 1166 | 197 | 6133  | 592  | 7222  | 1124 | 209 | 1511  | 501  | 1487  | 1014 | 208 | 2755  | 1148 | 1871  | 1716 |
| 3 | 2 | 2 | 3  | hsa_miR_128a    | mo-miR-128a | 3510  | 1292 | 1718  | 1558 | 198 | 4454  | 652 | 6928  | 1024 | 211 | 6789  | 1821 | 8283  | 3305 | 203 | 1758  | 448  | 1688  | 869  | 212 | 3232  | 1348 | 1986  | 1778 |
| 3 | 2 | 2 | 4  | hsa_miR_130a    | mo-miR-130a | 3946  | 1023 | 3226  | 1845 | 210 | 6662  | 981 | 5226  | 1426 | 211 | 7774  | 1687 | 5287  | 2194 | 197 | 4963  | 745  | 6289  | 1009 | 206 | 3276  | 965  | 3649  | 1517 |
| 3 | 2 | 2 | 5  | hsa_miR_132     | mo-miR-132  | 2359  | 808  | 1577  | 1674 | 210 | 3758  | 851 | 3781  | 1716 | 207 | 6212  | 1050 | 6689  | 1542 | 205 | 1659  | 570  | 1656  | 983  | 211 | 2359  | 857  | 1675  | 1151 |
| 3 | 2 | 2 | 6  | hsa_miR_134     | mo-miR-134  | 3070  | 1078 | 1822  | 1336 | 208 | 4451  | 438 | 5159  | 659  | 209 | 4695  | 727  | 5184  | 1017 | 200 | 4348  | 810  | 3837  | 1526 | 208 | 3482  | 955  | 2100  | 1323 |
| 3 | 2 | 2 | 7  | hsa_miR_23b     | mo-miR-23b  | 19772 | 1084 | 17362 | 1386 | 205 | 13463 | 552 | 11863 | 848  | 210 | 19061 | 654  | 16804 | 1266 | 204 | 10586 | 776  | 12354 | 1378 | 212 | 14978 | 1254 | 12400 | 1867 |
| 3 | 2 | 2 | 8  | hsa_miR_25      | mo-miR-25   | 4234  | 1000 | 3139  | 1543 | 207 | 5141  | 540 | 4583  | 658  | 205 | 7990  | 732  | 10994 | 1222 | 211 | 2768  | 795  | 2338  | 1214 | 212 | 7263  | 1091 | 8541  | 1306 |
| 3 | 2 | 2 | 9  | hsa_miR_26b     | mo-miR-26b  | 4913  | 845  | 3990  | 1071 | 202 | 4826  | 922 | 4612  | 1757 | 205 | 8304  | 811  | 7558  | 1286 | 209 | 3973  | 886  | 3268  | 1341 | 210 | 6288  | 809  | 6574  | 1240 |
| 3 | 2 | 2 | 10 | hsa_miR_27b     | mo-miR-27b  | 8364  | 977  | 7568  | 1368 | 207 | 6162  | 362 | 5883  | 606  | 212 | 11013 | 1116 | 9810  | 2154 | 210 | 6960  | 887  | 6843  | 1390 | 209 | 7935  | 1062 | 6534  | 1662 |
| 3 | 2 | 2 | 11 | hsa_miR_296     | mo-miR-296  | 4296  | 1068 | 4697  | 1597 | 209 | 1826  | 508 | 1583  | 850  | 209 | 3113  | 987  | 2545  | 1551 | 209 | 2124  | 760  | 3460  | 1019 | 208 | 3884  | 1028 | 2211  | 1374 |
| 3 | 2 | 2 | 12 | hsa_miR_29a     | mo-miR-29a  | 9159  | 962  | 9666  | 1077 | 205 | 5686  | 573 | 6218  | 872  | 204 | 7340  | 1260 | 6567  | 2207 | 212 | 4320  | 412  | 5028  | 877  | 209 | 6589  | 1249 | 5253  | 1672 |
| 3 | 2 | 2 | 13 | mmu_miR_140_AS  |             | 2893  | 1116 | 1763  | 1900 | 208 | 2595  | 568 | 2596  | 1004 | 208 | 2763  | 694  | 2059  | 1011 | 206 | 1744  | 599  | 1647  | 1069 | 211 | 2015  | 708  | 2042  | 1285 |
| 3 | 2 | 2 | 14 | mmu_miR_155     |             | 2238  | 587  | 1566  | 905  | 204 | 2837  | 580 | 2422  | 787  | 206 | 1811  | 638  | 1780  | 1209 | 209 | 1839  | 806  | 1800  | 1512 | 210 | 2599  | 967  | 1875  | 1535 |
| 3 | 2 | 2 | 15 | mmu_miR_192     |             | 2765  | 843  | 1841  | 1239 | 208 | 1341  | 359 | 1281  | 577  | 209 | 2261  | 714  | 1477  | 989  | 207 | 1809  | 824  | 1058  | 1284 | 205 | 3151  | 1038 | 1861  | 1266 |
| 3 | 2 | 2 | 16 | mmu_miR_201     |             | 3856  | 1709 | 1424  | 1888 | 199 | 2225  | 715 | 1549  | 945  | 200 | 2276  | 745  | 1819  | 1024 | 207 | 1522  | 463  | 1276  | 725  | 209 | 3148  | 909  | 1706  | 1090 |
| 3 | 2 | 2 | 17 | mmu_miR_207     |             | 2895  | 1411 | 1533  | 2095 | 207 | 1752  | 571 | 1547  | 845  | 208 | 2127  | 826  | 1369  | 1122 | 207 | 2233  | 763  | 1362  | 1143 | 206 | 3014  | 975  | 1748  | 1146 |
| 3 | 2 | 2 | 18 | mmu_miR_215     |             | 2657  | 816  | 1399  | 1178 | 208 | 1748  | 725 | 1268  | 930  | 206 | 2312  | 910  | 1306  | 1164 | 208 | 2225  | 879  | 1693  | 1287 | 205 | 3396  | 993  | 2197  | 1312 |
| 3 | 2 | 2 | 19 | hsa_miR_507     |             | 3821  | 1374 | 1747  | 1595 | 197 | 1775  | 732 | 924   | 1070 | 201 | 1893  | 799  | 1397  | 1122 | 206 | 3721  | 674  | 1540  | 1017 | 212 | 3717  | 1354 | 2090  | 1803 |
| 3 | 2 | 2 | 20 | hsa_miR_193b    |             | 2521  | 858  | 1976  | 1184 | 209 | 1838  | 720 | 1212  | 1027 | 204 | 2368  | 896  | 1470  | 1201 | 204 | 1630  | 758  | 1483  | 1263 | 210 | 3724  | 1448 | 2244  | 1937 |
| 3 | 2 | 2 | 21 | ambi_miR_7039   |             | 3758  | 1417 | 1491  | 1655 | 204 | 1696  | 744 | 1162  | 1132 | 200 | 2087  | 725  | 1510  | 1052 | 204 | 2175  | 787  | 1445  | 1157 | 201 | 2188  | 815  | 1900  | 1184 |
| 3 | 2 | 2 | 22 | hsa_miR_510     |             | 3648  | 1386 | 1718  | 1564 | 204 | 1621  | 679 | 1101  | 924  | 206 | 1644  | 572  | 1605  | 949  | 212 | 2305  | 767  | 2187  | 1060 | 206 | 2997  | 1039 | 1821  | 1316 |
| 3 | 2 | 2 | 23 | hsa_miR_518f_AS |             | 2151  | 901  | 1260  | 1164 | 206 | 1391  | 424 | 1018  | 646  | 209 | 2133  | 780  | 1349  | 1195 | 207 | 1718  | 533  | 1812  | 833  | 206 | 2066  | 884  | 1623  | 1500 |
| 3 | 2 | 2 | 24 | hsa_miR_526c    |             | 2065  | 832  | 1709  | 1410 | 207 | 1672  | 592 | 1239  | 1224 | 210 | 2141  | 1093 | 2164  | 1507 | 197 | 1637  | 459  | 1542  | 815  | 211 | 2364  | 955  | 1918  | 1663 |
| 3 | 2 | 3 | 1  | hsa_miR_146a    | mo-miR-146  | 4061  | 1102 | 2103  | 1384 | 203 | 2479  | 710 | 2387  | 829  | 208 | 4236  | 923  | 3447  | 1229 | 207 | 2836  | 588  | 2542  | 873  | 207 | 3820  | 1042 | 4426  | 1605 |
| 3 | 2 | 3 | 2  | hsa_miR_146a    |             | 2914  | 1289 | 1936  | 1951 | 210 | 2075  | 813 | 1227  | 1214 | 208 | 1935  | 593  | 1508  | 855  | 209 | 2257  | 608  | 1727  | 757  | 207 | 2980  | 876  | 2032  | 1201 |
| 3 | 2 | 3 | 3  | hsa_miR_149     |             | 2889  | 930  | 1603  | 1202 | 204 | 1767  | 662 | 1261  | 1181 | 204 | 2973  | 806  | 2897  | 1294 | 210 | 1748  | 772  | 1345  | 1333 | 209 | 2506  | 939  | 1336  | 1405 |
| 3 | 2 | 3 | 4  | hsa_miR_151     |             | 3399  | 1166 | 5415  | 1759 | 208 | 2375  | 922 | 2798  | 740  | 212 | 4377  | 1225 | 3983  | 1918 | 209 | 2181  | 851  | 2114  | 1419 | 205 | 2358  | 890  | 2052  | 1515 |
| 3 | 2 | 3 | 5  | hsa_miR_153     | mo-miR-153  | 2534  | 1109 | 1582  | 1095 | 206 | 1219  | 574 | 1293  | 1064 | 212 | 3377  | 1801 | 1951  | 2618 | 200 | 1906  | 661  | 1324  | 1015 | 201 | 2409  | 821  | 1857  | 1183 |
| 3 | 2 | 3 | 6  | hsa_miR_155     |             | 2896  | 798  | 1430  | 1021 | 206 | 1668  | 719 | 1135  | 1222 | 209 | 1883  | 504  | 1811  | 1061 | 212 | 2537  | 771  | 2205  | 1581 |     |       |      |       |      |

|   |   |   |    |                 |               |       |      |       |      |     |       |      |       |      |     |       |      |       |      |     |       |      |       |      |     |       |      |       |      |
|---|---|---|----|-----------------|---------------|-------|------|-------|------|-----|-------|------|-------|------|-----|-------|------|-------|------|-----|-------|------|-------|------|-----|-------|------|-------|------|
| 4 | 1 | 1 | 10 | hsa_miR_22      | mi-miR-22     | 10058 | 842  | 12175 | 1128 | 209 | 6832  | 380  | 8210  | 607  | 210 | 10555 | 1008 | 9904  | 1271 | 205 | 4482  | 687  | 3878  | 1154 | 206 | 7701  | 1158 | 7122  | 1551 |
| 4 | 1 | 1 | 11 | hsa_miR_221     | mi-miR-221    | 4722  | 1030 | 3530  | 1395 | 207 | 2944  | 495  | 3166  | 1066 | 212 | 6228  | 907  | 5635  | 1249 | 205 | 3377  | 445  | 3210  | 757  | 210 | 4878  | 1052 | 4472  | 1501 |
| 4 | 1 | 1 | 12 | hsa_miR_223     | mi-miR-223    | 4568  | 1077 | 4200  | 1403 | 207 | 8509  | 717  | 11682 | 1011 | 208 | 3506  | 702  | 2562  | 1017 | 207 | 7113  | 671  | 8712  | 1127 | 209 | 9878  | 1082 | 12728 | 1676 |
| 4 | 1 | 1 | 13 | hsa_miR_9       | mi-miR-9      | 3375  | 1032 | 1624  | 1175 | 205 | 4485  | 833  | 6281  | 1693 | 209 | 3398  | 904  | 1662  | 1145 | 208 | 1893  | 622  | 1698  | 960  | 209 | 3584  | 1297 | 1821  | 1723 |
| 4 | 1 | 1 | 14 | hsa_miR_92      | mi-miR-92     | 3571  | 1071 | 1752  | 1278 | 201 | 1774  | 557  | 1256  | 861  | 207 | 3646  | 918  | 1993  | 1187 | 201 | 2238  | 845  | 1498  | 1102 | 199 | 3838  | 1153 | 2574  | 1425 |
| 4 | 1 | 1 | 15 | hsa_miR_95      |               | 3036  | 1188 | 1756  | 1401 | 202 | 1434  | 621  | 1281  | 1329 | 210 | 1862  | 656  | 1767  | 1136 | 209 | 1600  | 434  | 1354  | 626  | 209 | 3142  | 1163 | 2064  | 1875 |
| 4 | 1 | 1 | 16 | hsa_miR_98      | mi-miR-98     | 3672  | 870  | 3372  | 1148 | 210 | 2388  | 521  | 2273  | 1141 | 207 | 1990  | 701  | 1824  | 1443 | 212 | 1507  | 505  | 1439  | 1141 | 211 | 3602  | 1200 | 2238  | 1814 |
| 4 | 1 | 1 | 17 | hsa_miR_99b     | mi-miR-99b    | 4797  | 885  | 3764  | 1064 | 210 | 3172  | 719  | 3217  | 1373 | 208 | 4999  | 921  | 4026  | 1361 | 207 | 2843  | 350  | 3273  | 574  | 211 | 3360  | 862  | 2777  | 1144 |
| 4 | 1 | 1 | 18 | mmu_miR_101b    | mi-miR-101b   | 3706  | 1097 | 1972  | 1205 | 203 | 1476  | 644  | 1636  | 1397 | 209 | 3530  | 489  | 3917  | 830  | 210 | 2053  | 718  | 1891  | 1243 | 210 | 2825  | 926  | 2600  | 1653 |
| 4 | 1 | 1 | 19 | hsa_miR_524     |               | 2730  | 820  | 1539  | 1129 | 207 | 1908  | 938  | 1433  | 1310 | 201 | 1958  | 751  | 1695  | 1193 | 205 | 1533  | 560  | 1817  | 1107 | 209 | 4032  | 1245 | 2141  | 1641 |
| 4 | 1 | 1 | 20 | hsa_miR_515_3p  |               | 2373  | 900  | 1593  | 1323 | 211 | 1574  | 605  | 1457  | 1116 | 209 | 1977  | 484  | 1582  | 671  | 209 | 2225  | 856  | 1475  | 1364 | 207 | 3159  | 973  | 2420  | 1392 |
| 4 | 1 | 1 | 21 | ambi_miR_7026   |               | 3213  | 983  | 1772  | 1273 | 205 | 1368  | 511  | 1221  | 944  | 209 | 2312  | 708  | 1388  | 859  | 202 | 1533  | 574  | 1433  | 1040 | 209 | 3238  | 1308 | 2075  | 1669 |
| 4 | 1 | 1 | 22 | hsa_miR_512_3p  |               | 3001  | 1285 | 1695  | 1566 | 204 | 2024  | 989  | 1342  | 1754 | 198 | 1787  | 664  | 1349  | 991  | 207 | 1445  | 350  | 1769  | 804  | 210 | 2515  | 915  | 1887  | 1423 |
| 4 | 1 | 1 | 23 | hsa_miR_491     |               | 3066  | 914  | 1964  | 1068 | 209 | 1620  | 796  | 1257  | 1712 | 210 | 2032  | 875  | 1271  | 1259 | 205 | 1636  | 811  | 1280  | 1173 | 205 | 2903  | 999  | 2224  | 1622 |
| 4 | 1 | 1 | 24 | hsa_miR_514     |               | 2840  | 879  | 1762  | 1026 | 206 | 1368  | 563  | 1181  | 1298 | 207 | 2293  | 994  | 1410  | 1284 | 205 | 1368  | 724  | 1295  | 1541 | 213 | 3208  | 902  | 1906  | 1271 |
| 4 | 1 | 2 | 1  | hsa_miR_135a    | mi-miR-135a   | 6103  | 1459 | 6427  | 1793 | 207 | 4484  | 791  | 4499  | 936  | 206 | 2763  | 676  | 2801  | 1160 | 208 | 1439  | 550  | 1249  | 993  | 211 | 3514  | 1157 | 1723  | 1203 |
| 4 | 1 | 2 | 2  | hsa_miR_136a    | mi-miR-136a   | 5973  | 1067 | 6686  | 1384 | 209 | 3956  | 636  | 4600  | 1108 | 211 | 3243  | 1059 | 2707  | 1284 | 205 | 2325  | 776  | 1698  | 1031 | 204 | 3804  | 1201 | 2435  | 1373 |
| 4 | 1 | 2 | 3  | hsa_miR_138     | mi-miR-138    | 4222  | 1256 | 2126  | 1371 | 205 | 2668  | 813  | 2181  | 1208 | 206 | 3526  | 1230 | 1792  | 1516 | 202 | 2287  | 1093 | 1599  | 1875 | 210 | 4896  | 1101 | 2932  | 1360 |
| 4 | 1 | 2 | 4  | hsa_miR_140     | mi-miR-140    | 3218  | 1078 | 2313  | 1416 | 207 | 1697  | 700  | 1175  | 1087 | 205 | 4002  | 1359 | 2398  | 1653 | 204 | 2820  | 954  | 1649  | 1266 | 204 | 4747  | 1334 | 3527  | 2065 |
| 4 | 1 | 2 | 5  | hsa_miR_142_3p  | mi-miR-142-3p | 3305  | 1665 | 1943  | 2302 | 207 | 1996  | 884  | 1907  | 2331 | 205 | 3245  | 1150 | 2318  | 1800 | 202 | 1829  | 767  | 1389  | 1102 | 210 | 2693  | 596  | 1818  | 962  |
| 4 | 1 | 2 | 6  | hsa_miR_143     | mi-miR-143    | 8165  | 1269 | 8467  | 1266 | 204 | 6839  | 1439 | 7125  | 3411 | 212 | 4501  | 850  | 3556  | 1260 | 207 | 5513  | 834  | 4409  | 1524 | 211 | 4960  | 1265 | 4074  | 1712 |
| 4 | 1 | 2 | 7  | hsa_miR_143b    | mi-miR-143b   | 5662  | 896  | 6103  | 1033 | 206 | 2177  | 609  | 1902  | 1250 | 211 | 4110  | 713  | 3675  | 1262 | 205 | 2074  | 529  | 1665  | 1131 | 211 | 4544  | 1409 | 2619  | 1519 |
| 4 | 1 | 2 | 8  | hsa_miR_301     |               | 3622  | 1316 | 2040  | 1649 | 207 | 2027  | 687  | 1781  | 1393 | 208 | 2923  | 1173 | 2034  | 1525 | 204 | 2374  | 882  | 1899  | 1230 | 207 | 3209  | 932  | 1865  | 1146 |
| 4 | 1 | 2 | 9  | hsa_miR_302b    |               | 3307  | 1140 | 1356  | 1679 | 209 | 2192  | 642  | 1717  | 863  | 208 | 2926  | 1070 | 1928  | 1457 | 205 | 2046  | 947  | 1408  | 1633 | 204 | 4047  | 1224 | 2147  | 1598 |
| 4 | 1 | 2 | 10 | hsa_miR_302c    |               | 3575  | 1507 | 1560  | 2018 | 205 | 2205  | 399  | 2527  | 678  | 211 | 2098  | 889  | 1500  | 1395 | 205 | 1956  | 734  | 1205  | 1115 | 205 | 4074  | 1282 | 2125  | 1505 |
| 4 | 1 | 2 | 11 | hsa_miR_302d    |               | 3313  | 1274 | 1337  | 1462 | 201 | 2621  | 808  | 2110  | 1229 | 205 | 1778  | 727  | 1785  | 1319 | 211 | 1870  | 697  | 1462  | 1170 | 208 | 3085  | 873  | 3634  | 1422 |
| 4 | 1 | 2 | 12 | hsa_miR_30a_5p  | mi-miR-30a-5p | 16142 | 985  | 17220 | 1160 | 209 | 15557 | 1152 | 14234 | 1957 | 207 | 24700 | 914  | 20989 | 1345 | 209 | 12400 | 823  | 14345 | 1430 | 207 | 14726 | 998  | 13983 | 1503 |
| 4 | 1 | 2 | 13 | mmu_miR_217     | mi-miR-217    | 3026  | 1007 | 1755  | 1533 | 204 | 2284  | 842  | 1494  | 1455 | 207 | 3205  | 1053 | 1946  | 1377 | 204 | 2073  | 538  | 1497  | 955  | 210 | 2428  | 981  | 1933  | 1597 |
| 4 | 1 | 2 | 14 | mmu_miR_291_3p  | mi-miR-291-3p | 3656  | 1272 | 1715  | 1459 | 202 | 1765  | 428  | 1403  | 743  | 211 | 2974  | 1068 | 1675  | 1280 | 209 | 2304  | 984  | 1296  | 1265 | 202 | 2725  | 1151 | 1918  | 1576 |
| 4 | 1 | 2 | 15 | mmu_miR_292_3p  | mi-miR-292-3p | 2307  | 1012 | 1471  | 1510 | 211 | 1662  | 882  | 1306  | 1567 | 209 | 1909  | 663  | 1245  | 1155 | 207 | 2471  | 711  | 1693  | 1026 | 199 | 2887  | 1065 | 1823  | 1475 |
| 4 | 1 | 2 | 16 | mmu_miR_293     |               | 2519  | 1059 | 1416  | 2162 | 210 | 2308  | 504  | 2435  | 851  | 212 | 1973  | 707  | 1286  | 1191 | 206 | 1714  | 878  | 1283  | 1990 | 207 | 2650  | 1277 | 1836  | 1917 |
| 4 | 1 | 2 | 17 | mmu_miR_295     |               | 2721  | 939  | 1572  | 1429 | 206 | 2595  | 1316 | 2356  | 2377 | 203 | 2655  | 784  | 3135  | 1385 | 208 | 1509  | 581  | 1381  | 1210 | 209 | 3893  | 1001 | 3333  | 1421 |
| 4 | 1 | 2 | 18 | mmu_miR_298     | mi-miR-298    | 3785  | 1619 | 1723  | 1771 | 202 | 1779  | 863  | 1398  | 1571 | 208 | 2734  | 621  | 3035  | 1200 | 212 | 2061  | 629  | 1782  | 926  | 210 | 3448  | 989  | 1957  | 1245 |
| 4 | 1 | 2 | 19 | hsa_miR_526b    |               | 3800  | 1336 | 1974  | 1523 | 206 | 2000  | 716  | 1286  | 1213 | 205 | 2823  | 764  | 2272  | 1132 | 207 | 1636  | 561  | 1861  | 975  | 210 | 2969  | 927  | 2939  | 1489 |
| 4 | 1 | 2 | 20 | hsa_miR_525     |               | 3169  | 1189 | 1695  | 1539 | 201 | 1260  | 448  | 1126  | 746  | 210 | 1870  | 638  | 1598  | 1154 | 209 | 1493  | 576  | 1473  | 861  | 208 | 3483  | 1249 | 1931  | 1776 |
| 4 | 1 | 2 | 21 | hsa_miR_520d_AS |               | 3399  | 1320 | 1445  | 1586 | 202 | 1610  | 639  | 1235  | 1063 | 208 | 1869  | 478  | 1349  | 787  | 207 | 1242  | 419  | 1167  | 773  | 207 | 2741  | 1100 | 1843  | 1303 |
| 4 | 1 | 2 | 22 | hsa_miR_515_5p  |               | 3332  | 1700 | 950   | 2084 | 197 | 1368  | 593  | 984   | 878  | 205 | 1736  | 753  | 1261  | 1379 | 205 | 1836  | 706  | 1571  | 1214 | 209 | 2844  | 1114 | 2075  | 1783 |
| 4 | 1 | 2 | 23 | ambi_miR_7054   |               | 3293  | 1320 | 1662  | 1691 | 201 | 1564  | 677  | 1099  | 1162 | 209 | 2103  | 814  | 1448  | 1199 | 206 | 1795  | 618  | 1259  | 946  | 201 | 4798  | 1029 | 2315  | 1785 |
| 4 | 1 | 2 | 24 | hsa_miR_498     |               | 2630  | 836  | 1588  | 1179 | 208 | 1480  | 530  | 1263  | 826  | 209 | 2037  | 741  | 1699  | 1105 | 206 | 1574  | 617  | 1396  | 1212 | 212 | 2362  | 1550 | 2622  | 2325 |
| 4 | 1 | 3 | 1  | hsa_miR_15a     |               | 7027  | 1359 | 6799  | 2690 | 203 | 3830  | 673  | 3459  | 982  | 209 | 3619  | 931  | 3087  | 1227 | 205 | 17167 | 612  | 20884 | 1137 | 204 | 4587  | 1380 | 3625  | 2600 |
| 4 | 1 | 3 | 2  | hsa_miR_16      | mi-miR-16     | 8526  | 928  | 9795  | 1383 | 208 | 9615  | 730  | 9356  | 1116 | 207 | 19198 | 1053 | 18642 | 1245 | 204 | 27465 | 888  | 23857 | 1405 | 207 | 10034 | 1027 | 10633 | 1661 |
| 4 | 1 | 3 | 3  | hsa_miR_17_5p   | mi-miR-17     | 4190  | 1251 | 2431  | 1587 | 204 | 3464  | 615  | 2909  | 915  | 207 | 7484  | 992  | 7454  | 1271 | 209 | 3388  | 810  | 2678  | 1200 | 204 | 3425  | 642  | 3411  | 1141 |
| 4 | 1 | 3 | 4  | hsa_miR_181a    | mi-miR-181a   | 4136  | 1221 | 2502  | 1511 | 206 | 3616  | 765  | 4022  | 1125 | 209 | 5238  | 905  | 4022  | 1184 | 202 | 5579  | 997  | 5476  | 1276 | 203 | 3301  | 1079 | 2951  | 2124 |
| 4 | 1 | 3 | 5  | hsa_miR_181c    | mi-miR-181c   | 2784  | 1293 | 1351  | 2207 | 203 | 3403  | 837  | 4378  | 1214 | 203 | 3391  | 1093 | 2324  | 1544 | 207 | 2398  | 633  | 2081  | 921  | 210 | 2844  | 1015 | 2153  | 2138 |
| 4 | 1 | 3 | 6  | hsa_miR_182_AS  |               | 4069  | 1107 | 2213  | 1151 | 196 | 1549  | 426  | 2085  | 779  | 212 | 3174  | 805  | 2598  | 1004 | 205 | 2210  | 797  | 1834  | 1419 | 209 | 2825  | 1076 | 1962  | 2129 |
| 4 | 1 | 3 | 7  | hsa_miR_328     | mi-miR-328    | 2429  | 753  | 1491  | 1002 | 211 | 1277  | 323  | 1415  | 540  | 209 | 1535  | 593  | 1485  | 880  | 210 | 1682  | 606  | 1748  | 989  | 210 | 3448  | 989  | 1957  | 1245 |
| 4 | 1 | 3 | 8  | hsa_miR_330     |               | 2928  | 1131 | 1430  | 1730 | 209 | 1673  | 676  | 1461  | 1237 | 207 | 1922  | 652  | 1326  | 1011 | 209 | 1954  | 647  | 1578  | 947  | 205 | 3326  | 907  | 1819  | 1130 |
| 4 | 1 | 3 | 9  | hsa_miR_335     | mi-miR-335    | 4002  | 1477 | 1626  | 1923 | 198 |       |      |       |      |     |       |      |       |      |     |       |      |       |      |     |       |      |       |      |

|   |   |   |    |                 |                |      |      |      |      |     |      |      |      |      |     |      |      |      |      |     |      |      |      |      |     |      |      |      |      |
|---|---|---|----|-----------------|----------------|------|------|------|------|-----|------|------|------|------|-----|------|------|------|------|-----|------|------|------|------|-----|------|------|------|------|
| 4 | 2 | 1 | 13 | hsa_miR_9_AS    |                | 2559 | 604  | 2372 | 1185 | 208 | 1867 | 635  | 1365 | 885  | 202 | 2488 | 536  | 2166 | 866  | 211 | 2195 | 743  | 1710 | 1229 | 208 | 1922 | 580  | 1748 | 1158 |
| 4 | 2 | 1 | 14 | hsa_miR_93      |                | 3027 | 903  | 2282 | 1550 | 208 | 3282 | 800  | 3236 | 1445 | 208 | 3711 | 1031 | 2635 | 1429 | 205 | 2795 | 522  | 2487 | 977  | 208 | 2976 | 759  | 2389 | 1219 |
| 4 | 2 | 1 | 15 | hsa_miR_96      |                | 2642 | 857  | 1837 | 1171 | 206 | 1728 | 611  | 1325 | 901  | 204 | 2266 | 783  | 1249 | 1322 | 197 | 2459 | 874  | 1229 | 1073 | 202 | 3303 | 936  | 4958 | 1373 |
| 4 | 2 | 1 | 16 | hsa_miR_99a     | mo-miR-99a     | 6135 | 921  | 5384 | 1117 | 207 | 3603 | 499  | 3636 | 691  | 209 | 4539 | 779  | 4282 | 1288 | 205 | 5344 | 692  | 5413 | 978  | 205 | 3938 | 594  | 3926 | 827  |
| 4 | 2 | 1 | 17 | mmu_lal_74L_AS  | mo-lal-74*     | 3963 | 675  | 3596 | 957  | 206 | 2363 | 489  | 2355 | 680  | 207 | 3907 | 823  | 4710 | 1284 | 207 | 1427 | 479  | 1455 | 948  | 214 | 2830 | 1296 | 2233 | 2109 |
| 4 | 2 | 1 | 18 | mmu_miR_106a    |                | 3096 | 605  | 2731 | 1956 | 209 | 3177 | 703  | 2672 | 958  | 204 | 3897 | 999  | 4040 | 1397 | 205 | 2519 | 563  | 2713 | 1113 | 206 | 3823 | 1273 | 3254 | 1766 |
| 4 | 2 | 1 | 19 | hsa_miR_518a    |                | 2351 | 1008 | 1389 | 1298 | 209 | 1512 | 752  | 941  | 1085 | 206 | 2559 | 1002 | 1158 | 1262 | 200 | 2111 | 927  | 1754 | 1452 | 204 | 2621 | 990  | 2187 | 1536 |
| 4 | 2 | 1 | 20 | hsa_miR_516_3p  |                | 2141 | 936  | 1464 | 1326 | 205 | 1401 | 663  | 1344 | 1125 | 209 | 1611 | 383  | 1579 | 619  | 214 | 2359 | 903  | 1084 | 1287 | 202 | 2193 | 850  | 1780 | 1338 |
| 4 | 2 | 1 | 21 | ambi_miR_7027   |                | 2145 | 903  | 1603 | 1649 | 208 | 1524 | 627  | 1146 | 1052 | 210 | 1286 | 264  | 1438 | 463  | 209 | 2061 | 645  | 1551 | 929  | 206 | 3005 | 1255 | 1918 | 2411 |
| 4 | 2 | 1 | 22 | ambi_miR_7029   |                | 2621 | 847  | 1827 | 1393 | 205 | 1801 | 664  | 1553 | 1016 | 206 | 2263 | 877  | 1779 | 1207 | 207 | 1992 | 674  | 1655 | 1054 | 210 | 3721 | 1334 | 5990 | 1903 |
| 4 | 2 | 1 | 23 | hsa_miR_506     |                | 2398 | 651  | 1746 | 953  | 206 | 1312 | 594  | 1097 | 1008 | 209 | 2163 | 821  | 1456 | 1225 | 207 | 1363 | 895  | 1213 | 1550 | 211 | 3816 | 1257 | 5573 | 3056 |
| 4 | 2 | 1 | 24 | hsa_miR_509     |                | 2519 | 873  | 1615 | 1536 | 206 | 1395 | 531  | 1113 | 780  | 208 | 1635 | 619  | 1622 | 1122 | 211 | 1829 | 614  | 1580 | 1150 | 210 | 2925 | 1835 | 1768 | 3494 |
| 4 | 2 | 2 | 1  | hsa_miR_135b    | mo-miR-135b    | 2844 | 1140 | 1624 | 1402 | 209 | 2241 | 613  | 2229 | 1157 | 210 | 2259 | 695  | 2031 | 1830 | 207 | 1671 | 808  | 1613 | 1684 | 211 | 3102 | 1028 | 2121 | 1413 |
| 4 | 2 | 2 | 2  | hsa_miR_137     | mo-miR-137     | 3531 | 1069 | 1956 | 1372 | 208 | 1620 | 512  | 1528 | 893  | 210 | 2770 | 884  | 1779 | 1873 | 203 | 1408 | 580  | 1489 | 1176 | 207 | 3096 | 974  | 2180 | 1373 |
| 4 | 2 | 2 | 3  | hsa_miR_139     | mo-miR-139     | 3501 | 1070 | 1832 | 1341 | 206 | 2153 | 852  | 1958 | 1765 | 208 | 2329 | 710  | 1853 | 1108 | 208 | 1552 | 618  | 1500 | 1054 | 212 | 2364 | 815  | 2055 | 1492 |
| 4 | 2 | 2 | 4  | hsa_miR_141     | mo-miR-141     | 5613 | 1448 | 3661 | 1500 | 201 | 3240 | 606  | 3034 | 1511 | 212 | 3645 | 839  | 3335 | 1202 | 207 | 4312 | 1014 | 2953 | 1829 | 210 | 3515 | 887  | 3027 | 1349 |
| 4 | 2 | 2 | 5  | hsa_miR_142_5p  | mo-miR-142-5p  | 2431 | 882  | 1628 | 1398 | 212 | 3455 | 1148 | 2327 | 1986 | 207 | 3415 | 772  | 2442 | 1208 | 200 | 4730 | 809  | 3856 | 1015 | 205 | 2855 | 655  | 2661 | 1167 |
| 4 | 2 | 2 | 6  | hsa_miR_144     | mo-miR-144     | 2622 | 653  | 1858 | 915  | 211 | 3110 | 1146 | 2956 | 1747 | 207 | 1658 | 534  | 1872 | 1105 | 210 | 1609 | 582  | 1328 | 1022 | 207 | 2338 | 557  | 2350 | 961  |
| 4 | 2 | 2 | 7  | hsa_miR_29c     | mo-miR-29c     | 2869 | 987  | 1983 | 1440 | 209 | 1977 | 798  | 1823 | 1186 | 207 | 1645 | 618  | 1506 | 1096 | 205 | 2147 | 548  | 2075 | 1069 | 210 | 2598 | 789  | 2207 | 1433 |
| 4 | 2 | 2 | 8  | hsa_miR_302a    |                | 2412 | 1030 | 1684 | 1541 | 207 | 1341 | 406  | 1247 | 750  | 210 | 1639 | 463  | 1685 | 834  | 207 | 1518 | 949  | 1119 | 1639 | 206 | 2561 | 992  | 1679 | 1374 |
| 4 | 2 | 2 | 9  | hsa_miR_302b_AS |                | 1914 | 623  | 1475 | 1080 | 212 | 1341 | 568  | 1279 | 1115 | 205 | 2307 | 800  | 1424 | 1187 | 197 | 1779 | 416  | 1564 | 603  | 206 | 2534 | 895  | 1908 | 1410 |
| 4 | 2 | 2 | 10 | hsa_miR_302c_AS |                | 2182 | 817  | 1636 | 1132 | 208 | 1522 | 420  | 1740 | 794  | 211 | 1640 | 648  | 1681 | 1231 | 214 | 2197 | 971  | 1349 | 1356 | 207 | 3181 | 862  | 2530 | 1399 |
| 4 | 2 | 2 | 11 | hsa_miR_303a_3p | mo-miR-303a-3p | 3126 | 935  | 1865 | 1242 | 206 | 1641 | 461  | 1644 | 797  | 210 | 2629 | 638  | 2550 | 1155 | 209 | 2785 | 866  | 1959 | 1115 | 209 | 3279 | 979  | 2396 | 1532 |
| 4 | 2 | 2 | 12 | hsa_miR_30b     | mo-miR-30b     | 3643 | 848  | 3054 | 1162 | 209 | 3149 | 855  | 2271 | 1213 | 202 | 3122 | 461  | 3146 | 671  | 209 | 6214 | 545  | 6288 | 992  | 212 | 3645 | 552  | 3215 | 1041 |
| 4 | 2 | 2 | 13 | mmu_miR_290     | mo-miR-290     | 2040 | 705  | 1474 | 1111 | 211 | 1713 | 586  | 1711 | 936  | 206 | 2055 | 551  | 1670 | 828  | 206 | 1838 | 789  | 1278 | 1410 | 201 | 2110 | 727  | 1894 | 1171 |
| 4 | 2 | 2 | 14 | mmu_miR_291_5p  | mo-miR-291-5p  | 1850 | 625  | 1579 | 1125 | 211 | 1468 | 662  | 1391 | 1055 | 207 | 2010 | 695  | 1644 | 1026 | 202 | 2122 | 877  | 1521 | 1377 | 199 | 2364 | 741  | 1764 | 1193 |
| 4 | 2 | 2 | 15 | mmu_miR_292_5p  | mo-miR-292-5p  | 2233 | 842  | 1856 | 1091 | 209 | 1559 | 595  | 1229 | 927  | 205 | 1965 | 550  | 1493 | 949  | 211 | 2448 | 999  | 1592 | 1237 | 204 | 3216 | 913  | 4442 | 1528 |
| 4 | 2 | 2 | 16 | mmu_miR_294     |                | 1939 | 636  | 1476 | 848  | 208 | 1655 | 442  | 1872 | 814  | 209 | 1568 | 820  | 1449 | 1228 | 208 | 1901 | 964  | 1420 | 1284 | 204 | 2260 | 865  | 2250 | 1382 |
| 4 | 2 | 2 | 17 | mmu_miR_297     |                | 1673 | 565  | 1400 | 1075 | 209 | 1700 | 321  | 1461 | 740  | 212 | 1897 | 737  | 1566 | 1492 | 211 | 2721 | 1001 | 1497 | 1278 | 196 | 3635 | 1419 | 2203 | 1652 |
| 4 | 2 | 2 | 18 | mmu_miR_300     | mo-miR-300     | 1773 | 634  | 1346 | 999  | 208 | 1320 | 488  | 1302 | 642  | 209 | 1764 | 629  | 1774 | 981  | 206 | 1969 | 794  | 1697 | 1295 | 207 | 2902 | 1098 | 1784 | 1939 |
| 4 | 2 | 2 | 19 | hsa_miR_520a_AS |                | 2005 | 588  | 1664 | 895  | 208 | 2128 | 826  | 1144 | 998  | 202 | 1463 | 799  | 1178 | 1255 | 209 | 2326 | 1079 | 1732 | 1514 | 203 | 3038 | 879  | 5069 | 1107 |
| 4 | 2 | 2 | 20 | hsa_miR_524_AS  |                | 2526 | 795  | 1519 | 1145 | 206 | 2158 | 851  | 1251 | 1077 | 207 | 2665 | 813  | 1642 | 1012 | 207 | 2391 | 876  | 1287 | 1251 | 201 | 3392 | 1171 | 2401 | 1651 |
| 4 | 2 | 2 | 21 | hsa_miR_527     |                | 1681 | 539  | 1438 | 867  | 209 | 1705 | 824  | 1244 | 1317 | 207 | 2125 | 773  | 1624 | 1382 | 205 | 1804 | 1078 | 1429 | 2323 | 210 | 3192 | 1586 | 3297 | 1227 |
| 4 | 2 | 2 | 22 | hsa_miR_519a_AS |                | 2247 | 670  | 1837 | 877  | 206 | 1630 | 748  | 1285 | 1260 | 207 | 1661 | 759  | 1465 | 1371 | 210 | 1505 | 519  | 1646 | 973  | 211 | 3249 | 1304 | 1507 | 1711 |
| 4 | 2 | 2 | 23 | ambi_miR_7055   |                | 2889 | 916  | 1272 | 1067 | 195 | 1529 | 511  | 1180 | 767  | 209 | 2433 | 1008 | 1850 | 1307 | 206 | 1538 | 559  | 1688 | 940  | 209 | 3651 | 1464 | 1876 | 1939 |
| 4 | 2 | 2 | 24 | hsa_miR_513     |                | 2427 | 873  | 1489 | 1604 | 206 | 1338 | 560  | 1069 | 883  | 209 | 2305 | 763  | 1718 | 1119 | 208 | 1839 | 619  | 1966 | 1228 | 208 | 2528 | 888  | 2187 | 1317 |
| 4 | 2 | 3 | 1  | hsa_miR_15b     | mo-miR-15b     | 7431 | 1209 | 6341 | 1489 | 209 | 3982 | 770  | 4143 | 2130 | 212 | 7140 | 735  | 5721 | 980  | 209 | 7290 | 369  | 6968 | 769  | 210 | 4487 | 634  | 3684 | 1078 |
| 4 | 2 | 3 | 2  | hsa_miR_17_3p   |                | 4104 | 1265 | 2594 | 1620 | 205 | 2373 | 653  | 1791 | 1017 | 204 | 3398 | 614  | 2671 | 816  | 209 | 2297 | 1131 | 1467 | 1969 | 204 | 4453 | 1236 | 3138 | 1510 |
| 4 | 2 | 3 | 3  | hsa_miR_18a     | mo-miR-18      | 3029 | 1045 | 1963 | 1324 | 208 | 2225 | 612  | 2020 | 1054 | 206 | 3332 | 936  | 2435 | 1216 | 204 | 2171 | 846  | 1798 | 1281 | 206 | 2683 | 166  | 2414 | 1123 |
| 4 | 2 | 3 | 4  | hsa_miR_181b    | mo-miR-181b    | 3559 | 1364 | 1962 | 1568 | 207 | 2454 | 645  | 1996 | 876  | 201 | 2577 | 774  | 2423 | 1152 | 210 | 2404 | 365  | 2233 | 822  | 209 | 2582 | 788  | 2434 | 1281 |
| 4 | 2 | 3 | 5  | hsa_miR_182     |                | 2745 | 1002 | 2154 | 1556 | 205 | 4283 | 1129 | 2975 | 1482 | 191 | 2315 | 573  | 2531 | 1226 | 211 | 4183 | 666  | 3614 | 1152 | 212 | 3110 | 798  | 2526 | 1153 |
| 4 | 2 | 3 | 6  | hsa_miR_183     | mo-miR-183     | 2808 | 906  | 1967 | 1307 | 208 | 2955 | 1024 | 2392 | 1765 | 207 | 1995 | 583  | 1784 | 1203 | 210 | 3031 | 932  | 2391 | 1495 | 208 | 3108 | 700  | 2907 | 1213 |
| 4 | 2 | 3 | 7  | hsa_miR_33      | mo-miR-33      | 3014 | 1025 | 1565 | 1351 | 207 | 2193 | 688  | 4438 | 999  | 207 | 2280 | 754  | 1965 | 1341 | 209 | 3235 | 727  | 2303 | 1069 | 201 | 3791 | 1495 | 2128 | 1805 |
| 4 | 2 | 3 | 8  | hsa_miR_331     | mo-miR-331     | 2232 | 782  | 1258 | 1000 | 204 | 1938 | 817  | 1479 | 1145 | 206 | 2066 | 956  | 1669 | 1718 | 206 | 2227 | 859  | 1642 | 1294 | 204 | 2437 | 913  | 2207 | 1359 |
| 4 | 2 | 3 | 9  | hsa_miR_337     |                | 2408 | 1030 | 1497 | 1244 | 206 | 1285 | 490  | 1015 | 839  | 208 | 2708 | 1091 | 1351 | 1637 | 199 | 1432 | 769  | 1379 | 1380 | 208 | 2346 | 923  | 1745 | 1357 |
| 4 | 2 | 3 | 10 | hsa_miR_339     | mo-miR-339     | 2397 | 637  | 1667 | 971  | 210 | 1559 | 539  | 1408 | 873  | 211 | 1995 | 748  | 1180 | 1026 | 202 | 1981 | 1029 | 1075 | 1896 | 203 | 2186 | 767  | 1861 | 1191 |
| 4 | 2 | 3 | 11 | hsa_miR_342     | mo-miR-342     | 2794 | 679  | 1753 | 895  | 205 | 1465 | 463  | 1568 | 882  | 210 | 2053 | 687  | 1516 | 1075 | 209 | 2819 | 1055 | 2087 | 1754 | 202 | 2143 | 815  | 1677 | 1349 |
| 4 | 2 | 3 | 12 | hsa_miR_346     |                | 2160 | 634  | 1661 | 1081 | 208 | 1302 | 495  | 1042 | 757  | 209 | 1757 | 439  | 1592 | 759  | 210 | 2508 | 752  | 19   |      |     |      |      |      |      |

|   |   |   |    |                 |               |       |      |       |      |     |       |      |       |       |     |       |      |       |      |     |       |      |       |      |     |       |      |       |      |
|---|---|---|----|-----------------|---------------|-------|------|-------|------|-----|-------|------|-------|-------|-----|-------|------|-------|------|-----|-------|------|-------|------|-----|-------|------|-------|------|
| 5 | 1 | 1 | 16 | hsa_miR_98      | mi-miR-98     | 4227  | 1592 | 2450  | 1946 | 202 | 1777  | 549  | 1466  | 845   | 209 | 3048  | 1008 | 1948  | 1420 | 202 | 1874  | 639  | 1604  | 1053 | 204 | 3368  | 1061 | 2290  | 1338 |
| 5 | 1 | 1 | 17 | hsa_miR_99b     | mi-miR-99b    | 4481  | 1071 | 2907  | 1355 | 208 | 2107  | 590  | 1778  | 1073  | 208 | 3760  | 746  | 3225  | 1162 | 210 | 3924  | 640  | 3219  | 1000 | 209 | 4389  | 1136 | 2994  | 1485 |
| 5 | 1 | 1 | 18 | mmu_miR_101b    | mi-miR-101b   | 4347  | 1522 | 1808  | 1429 | 193 | 1427  | 410  | 1210  | 672   | 211 | 2546  | 583  | 2325  | 1117 | 212 | 1969  | 674  | 1798  | 1214 | 211 | 3241  | 1277 | 2155  | 1822 |
| 5 | 1 | 1 | 19 | hsa_miR_524     |               | 3870  | 1220 | 1669  | 1517 | 206 | 1743  | 774  | 954   | 1094  | 208 | 1408  | 597  | 1075  | 878  | 210 | 2012  | 672  | 2119  | 1324 | 213 | 2714  | 1010 | 1933  | 1252 |
| 5 | 1 | 1 | 20 | hsa_miR_515_3p  |               | 2727  | 968  | 1721  | 1441 | 209 | 1389  | 495  | 1074  | 792   | 207 | 2196  | 622  | 2535  | 1208 | 207 | 2298  | 725  | 1593  | 1090 | 205 | 3560  | 1069 | 1894  | 1123 |
| 5 | 1 | 1 | 21 | ambi_miR_7026   |               | 2553  | 1193 | 1556  | 1628 | 210 | 1433  | 611  | 1171  | 927   | 209 | 1599  | 850  | 1613  | 2678 | 212 | 1839  | 711  | 1363  | 1186 | 208 | 2526  | 820  | 1635  | 1230 |
| 5 | 1 | 1 | 22 | hsa_miR_512_3p  |               | 2753  | 1265 | 1451  | 1598 | 210 | 1809  | 572  | 1050  | 780   | 206 | 2124  | 1164 | 1652  | 2948 | 206 | 1590  | 686  | 1522  | 1250 | 207 | 2134  | 588  | 1620  | 797  |
| 5 | 1 | 1 | 23 | hsa_miR_491     |               | 2741  | 773  | 1795  | 960  | 210 | 1335  | 419  | 1136  | 603   | 211 | 2461  | 864  | 1449  | 1112 | 206 | 1633  | 887  | 1704  | 1823 | 211 | 2958  | 932  | 1913  | 1225 |
| 5 | 1 | 1 | 24 | hsa_miR_514     |               | 3162  | 931  | 2986  | 1296 | 210 | 1282  | 333  | 1334  | 675   | 208 | 2262  | 855  | 1541  | 1484 | 204 | 2028  | 929  | 1639  | 1416 | 208 | 3256  | 1147 | 1895  | 1247 |
| 5 | 1 | 2 | 1  | hsa_miR_135a    | mi-miR-135a   | 4256  | 819  | 4276  | 941  | 210 | 5767  | 719  | 6663  | 1238  | 205 | 5285  | 933  | 4502  | 1391 | 206 | 1962  | 809  | 1360  | 1381 | 210 | 3781  | 1299 | 1765  | 1471 |
| 5 | 1 | 2 | 2  | hsa_miR_136     | mi-miR-136    | 3062  | 970  | 2059  | 1021 | 208 | 4078  | 807  | 4592  | 1185  | 211 | 4092  | 1152 | 3813  | 2297 | 213 | 2142  | 1059 | 1447  | 1546 | 204 | 2855  | 1286 | 2081  | 1840 |
| 5 | 1 | 2 | 3  | hsa_miR_138     | mi-miR-138    | 2978  | 1136 | 1982  | 1489 | 211 | 2509  | 762  | 2331  | 1252  | 208 | 5325  | 1553 | 5831  | 5356 | 206 | 1806  | 797  | 1239  | 1325 | 211 | 3337  | 1082 | 2020  | 1344 |
| 5 | 1 | 2 | 4  | hsa_miR_140     | mi-miR-140    | 2668  | 898  | 1790  | 1317 | 205 | 1807  | 584  | 1623  | 1073  | 209 | 2550  | 971  | 1284  | 1339 | 205 | 1746  | 491  | 1571  | 874  | 208 | 4270  | 1420 | 3930  | 2159 |
| 5 | 1 | 2 | 5  | hsa_miR_142_3p  | mi-miR-142-3p | 4901  | 1256 | 5455  | 1656 | 208 | 2217  | 769  | 2576  | 1215  | 207 | 3747  | 959  | 2853  | 1111 | 208 | 1801  | 558  | 2655  | 969  | 209 | 5480  | 1788 | 3777  | 2080 |
| 5 | 1 | 2 | 6  | hsa_miR_143     | mi-miR-143    | 7213  | 953  | 7089  | 1042 | 201 | 5999  | 930  | 5435  | 1399  | 205 | 8025  | 956  | 6902  | 1339 | 205 | 6122  | 839  | 7510  | 1207 | 206 | 4773  | 1031 | 3462  | 1463 |
| 5 | 1 | 2 | 7  | hsa_miR_29b     | mi-miR-29b    | 2957  | 836  | 1897  | 1126 | 207 | 2329  | 708  | 2430  | 1612  | 209 | 4180  | 946  | 3234  | 1331 | 209 | 2926  | 718  | 2717  | 1259 | 207 | 4756  | 1541 | 2400  | 1914 |
| 5 | 1 | 2 | 8  | hsa_miR_301     |               | 2986  | 985  | 1570  | 1102 | 208 | 2041  | 567  | 1830  | 837   | 208 | 2467  | 792  | 1668  | 947  | 206 | 1737  | 805  | 1839  | 2026 | 210 | 3257  | 847  | 1931  | 1073 |
| 5 | 1 | 2 | 9  | hsa_miR_302b    |               | 3311  | 1343 | 1604  | 1489 | 207 | 1347  | 497  | 1156  | 735   | 208 | 2737  | 749  | 2275  | 1016 | 208 | 1819  | 989  | 1732  | 2079 | 207 | 3195  | 949  | 2268  | 1393 |
| 5 | 1 | 2 | 10 | hsa_miR_302c    |               | 3666  | 1149 | 1683  | 1142 | 204 | 1558  | 701  | 1130  | 1130  | 209 | 3260  | 811  | 2481  | 855  | 203 | 2215  | 677  | 1711  | 935  | 211 | 3968  | 1479 | 2212  | 1767 |
| 5 | 1 | 2 | 11 | hsa_miR_302d    |               | 3621  | 1383 | 2330  | 1627 | 205 | 4333  | 498  | 5387  | 857   | 211 | 7121  | 1147 | 7085  | 1682 | 204 | 1080  | 338  | 1206  | 908  | 211 | 8132  | 1410 | 8174  | 2025 |
| 5 | 1 | 2 | 12 | hsa_miR_30a_5p  | mi-miR-30a-5p | 14117 | 1445 | 14088 | 1748 | 204 | 11092 | 650  | 10113 | 961   | 209 | 15882 | 1440 | 13610 | 1842 | 200 | 15001 | 334  | 17276 | 746  | 212 | 12793 | 1225 | 12141 | 1698 |
| 5 | 1 | 2 | 13 | mmu_miR_217     | mi-miR-217    | 5413  | 1100 | 5366  | 1415 | 207 | 1050  | 285  | 1095  | 633   | 212 | 3696  | 1040 | 1967  | 1270 | 199 | 5190  | 389  | 6123  | 610  | 211 | 2329  | 1059 | 1971  | 1800 |
| 5 | 1 | 2 | 14 | mmu_miR_291_3p  | mi-miR-291-3p | 3989  | 1535 | 1971  | 1685 | 203 | 1548  | 515  | 1316  | 822   | 208 | 2683  | 942  | 1572  | 1402 | 204 | 1959  | 797  | 1313  | 1198 | 205 | 2324  | 1069 | 1907  | 1654 |
| 5 | 1 | 2 | 15 | mmu_miR_292_3p  | mi-miR-292-3p | 4133  | 1684 | 1325  | 1450 | 200 | 1750  | 872  | 1212  | 1566  | 203 | 1500  | 639  | 1356  | 1030 | 210 | 2017  | 648  | 1323  | 945  | 210 | 2988  | 876  | 1646  | 1246 |
| 5 | 1 | 2 | 16 | mmu_miR_293     | mi-miR-293    | 2358  | 999  | 1401  | 1303 | 210 | 2164  | 597  | 1354  | 791   | 198 | 1168  | 740  | 3072  | 1302 | 209 | 2004  | 753  | 1367  | 1093 | 207 | 1865  | 902  | 1486  | 1565 |
| 5 | 1 | 2 | 17 | mmu_miR_295     |               | 2819  | 887  | 1802  | 1076 | 207 | 1217  | 452  | 1371  | 959   | 209 | 3827  | 762  | 1944  | 1263 | 213 | 1436  | 599  | 1171  | 935  | 208 | 2652  | 936  | 2066  | 1327 |
| 5 | 1 | 2 | 18 | mmu_miR_298     | mi-miR-298    | 3498  | 1029 | 2261  | 1443 | 210 | 2387  | 494  | 2312  | 781   | 210 | 2876  | 466  | 2667  | 887  | 204 | 2228  | 684  | 1721  | 1091 | 205 | 3855  | 1009 | 2349  | 1125 |
| 5 | 1 | 2 | 19 | hsa_miR_526b    |               | 2595  | 709  | 1738  | 984  | 208 | 2868  | 801  | 2369  | 1174  | 204 | 2033  | 606  | 1901  | 1057 | 210 | 1680  | 719  | 1675  | 1275 | 209 | 3200  | 1063 | 2160  | 1522 |
| 5 | 1 | 2 | 20 | hsa_miR_525     |               | 2170  | 581  | 1396  | 777  | 211 | 2081  | 496  | 1824  | 817   | 209 | 2577  | 769  | 1570  | 1024 | 204 | 2239  | 781  | 1394  | 990  | 206 | 3320  | 1206 | 1983  | 1587 |
| 5 | 1 | 2 | 21 | hsa_miR_520d_AS |               | 2885  | 1164 | 1598  | 1378 | 202 | 1375  | 304  | 1220  | 491   | 209 | 2019  | 733  | 1528  | 1084 | 207 | 1716  | 627  | 1422  | 890  | 206 | 2019  | 687  | 2055  | 1318 |
| 5 | 1 | 2 | 22 | hsa_miR_515_5p  |               | 3555  | 1379 | 1548  | 1736 | 204 | 1448  | 663  | 1318  | 1001  | 208 | 2016  | 894  | 1384  | 1376 | 197 | 1323  | 681  | 1185  | 1146 | 211 | 2879  | 832  | 1632  | 959  |
| 5 | 1 | 2 | 23 | ambi_miR_7054   |               | 3121  | 1187 | 1843  | 1485 | 206 | 1344  | 462  | 1192  | 743   | 207 | 1615  | 453  | 1464  | 783  | 209 | 1330  | 701  | 1655  | 1721 | 212 | 3053  | 1319 | 2056  | 1958 |
| 5 | 1 | 2 | 24 | hsa_miR_498     |               | 3483  | 1088 | 1888  | 1099 | 206 | 1664  | 591  | 1451  | 803   | 208 | 2796  | 806  | 1611  | 1233 | 209 | 1939  | 874  | 1550  | 1259 | 212 | 3591  | 1096 | 2076  | 1365 |
| 5 | 1 | 3 | 1  | hsa_miR_15a     |               | 4354  | 1028 | 3673  | 1332 | 205 | 5342  | 673  | 6394  | 978   | 208 | 5788  | 725  | 6721  | 1112 | 207 | 3820  | 926  | 2987  | 1209 | 205 | 3033  | 977  | 2528  | 1308 |
| 5 | 1 | 3 | 2  | hsa_miR_16      | mi-miR-16     | 16416 | 1063 | 18436 | 1308 | 206 | 9470  | 554  | 10607 | 907   | 211 | 12643 | 821  | 15061 | 1524 | 210 | 16624 | 812  | 18105 | 1209 | 210 | 3933  | 1251 | 8485  | 1689 |
| 5 | 1 | 3 | 3  | hsa_miR_17_5p   | mi-miR-17     | 4860  | 774  | 4719  | 1253 | 210 | 3565  | 851  | 2868  | 1275  | 208 | 5373  | 1667 | 4515  | 5454 | 210 | 3225  | 977  | 2527  | 1388 | 209 | 4923  | 1849 | 3549  | 2384 |
| 5 | 1 | 3 | 4  | hsa_miR_181a    | mi-miR-181a   | 5251  | 873  | 5249  | 1194 | 211 | 2721  | 561  | 2406  | 1093  | 209 | 5381  | 812  | 4894  | 1029 | 208 | 4175  | 858  | 3974  | 1403 | 201 | 4967  | 1463 | 3201  | 1681 |
| 5 | 1 | 3 | 5  | hsa_miR_181c    | mi-miR-181c   | 3181  | 1265 | 1352  | 1441 | 202 | 2274  | 818  | 2330  | 1266  | 211 | 2860  | 901  | 2638  | 1465 | 206 | 1675  | 869  | 1648  | 1673 | 211 | 3322  | 920  | 1932  | 1187 |
| 5 | 1 | 3 | 6  | hsa_miR_182_AS  |               | 2543  | 1064 | 1764  | 1610 | 210 | 2340  | 1046 | 1389  | 1525  | 199 | 3958  | 921  | 2938  | 1134 | 202 | 1870  | 825  | 1222  | 1282 | 208 | 2662  | 760  | 2017  | 1017 |
| 5 | 1 | 3 | 7  | hsa_miR_328     | mi-miR-328    | 3684  | 1238 | 1890  | 1354 | 202 | 1316  | 335  | 1368  | 636   | 208 | 2576  | 677  | 2517  | 937  | 206 | 2123  | 855  | 4441  | 1344 | 208 | 2539  | 755  | 1806  | 1070 |
| 5 | 1 | 3 | 8  | hsa_miR_330     |               | 3415  | 1191 | 1717  | 1439 | 207 | 1070  | 493  | 973   | 861   | 208 | 1519  | 566  | 1356  | 1023 | 209 | 1803  | 690  | 1723  | 1140 | 208 | 2966  | 981  | 1804  | 1242 |
| 5 | 1 | 3 | 9  | hsa_miR_335     | mi-miR-335    | 2984  | 1066 | 2184  | 1493 | 208 | 1728  | 611  | 1283  | 907   | 209 | 2520  | 1009 | 1609  | 1467 | 206 | 1681  | 490  | 1519  | 833  | 210 | 3013  | 1134 | 1990  | 1843 |
| 5 | 1 | 3 | 10 | hsa_miR_338     | mi-miR-338    | 2076  | 783  | 1388  | 1033 | 209 | 3957  | 820  | 3807  | 1222  | 207 | 3390  | 1112 | 1580  | 1519 | 199 | 1959  | 563  | 1741  | 855  | 209 | 3627  | 1128 | 2137  | 1403 |
| 5 | 1 | 3 | 11 | hsa_miR_340     | mi-miR-340    | 2720  | 1005 | 1890  | 1223 | 209 | 3923  | 816  | 3348  | 1129  | 201 | 5400  | 2284 | 4439  | 4560 | 199 | 1795  | 819  | 1424  | 1218 | 209 | 2702  | 880  | 2049  | 1137 |
| 5 | 1 | 3 | 12 | hsa_miR_345     |               | 4272  | 1053 | 3243  | 1269 | 207 | 2948  | 716  | 3180  | 1282  | 206 | 3464  | 1870 | 2254  | 4389 | 199 | 1799  | 780  | 1743  | 1368 | 206 | 3519  | 1190 | 3350  | 1457 |
| 5 | 1 | 3 | 13 | mmu_miR_351     | mi-miR-351    | 2862  | 763  | 2561  | 1029 | 209 | 1702  | 794  | 1117  | 1138  | 202 | 1832  | 461  | 1791  | 640  | 212 | 1797  | 814  | 1558  | 1440 | 210 | 2172  | 965  | 1943  | 1779 |
| 5 | 1 | 3 | 14 | mmu_miR_376b    |               | 2492  | 851  | 1517  | 1162 | 209 | 1482  | 418  | 1537  | 578   | 210 | 2153  | 541  | 1387  | 680  | 209 | 1744  | 832  | 1051  | 1500 | 202 | 2003  | 710  | 1931  | 1116 |
| 5 | 1 | 3 | 15 | mmu_miR_383     |               | 2659  | 1048 | 1557  | 1481 | 208 | 1749  | 563  | 1705  | 903</ |     |       |      |       |      |     |       |      |       |      |     |       |      |       |      |

|   |   |   |    |                 |               |      |      |      |      |     |      |      |      |      |     |      |      |      |      |     |      |      |      |      |     |      |      |      |      |
|---|---|---|----|-----------------|---------------|------|------|------|------|-----|------|------|------|------|-----|------|------|------|------|-----|------|------|------|------|-----|------|------|------|------|
| 5 | 2 | 1 | 19 | hsa_miR_518a    |               | 3034 | 1114 | 1737 | 1391 | 209 | 1564 | 618  | 1042 | 822  | 206 | 1782 | 718  | 1434 | 1109 | 210 | 2230 | 901  | 1720 | 1267 | 205 | 2387 | 2219 | 1756 | 8596 |
| 5 | 2 | 1 | 20 | hsa_miR_516_3p  |               | 2362 | 1111 | 1371 | 1473 | 209 | 2210 | 891  | 1195 | 1207 | 196 | 2548 | 758  | 1540 | 991  | 207 | 1755 | 792  | 1435 | 1312 | 205 | 2631 | 1144 | 1863 | 1826 |
| 5 | 2 | 1 | 21 | ambi_miR_7027   |               | 1717 | 479  | 1702 | 816  | 213 | 1840 | 926  | 1483 | 1747 | 199 | 2009 | 798  | 1625 | 1215 | 203 | 1121 | 504  | 1207 | 1014 | 210 | 2377 | 1150 | 2104 | 1901 |
| 5 | 2 | 1 | 22 | ambi_miR_7029   |               | 2257 | 807  | 1935 | 1776 | 207 | 1714 | 722  | 1414 | 993  | 209 | 2119 | 803  | 1650 | 1086 | 206 | 2795 | 870  | 1949 | 1213 | 197 | 2961 | 787  | 2518 | 1191 |
| 5 | 2 | 1 | 23 | hsa_miR_506     |               | 2526 | 1026 | 1676 | 1474 | 209 | 2014 | 765  | 1591 | 1127 | 208 | 1882 | 738  | 1984 | 1063 | 207 | 1651 | 562  | 1386 | 1149 | 208 | 3026 | 1164 | 1720 | 1535 |
| 5 | 2 | 1 | 24 | hsa_miR_509     |               | 2863 | 988  | 1541 | 1318 | 209 | 1464 | 445  | 1320 | 760  | 211 | 1702 | 828  | 1934 | 1253 | 210 | 2580 | 757  | 2092 | 1019 | 204 | 3288 | 1218 | 2096 | 1478 |
| 5 | 2 | 2 | 1  | hsa_miR_135b    | mo-miR-135b   | 3136 | 1420 | 1641 | 2002 | 207 | 1693 | 852  | 1236 | 1266 | 206 | 2832 | 745  | 2166 | 989  | 205 | 1751 | 545  | 1487 | 819  | 208 | 2476 | 1016 | 2136 | 1557 |
| 5 | 2 | 2 | 2  | hsa_miR_137     | mo-miR-137    | 2851 | 1025 | 1989 | 1755 | 210 | 1878 | 586  | 1606 | 930  | 209 | 2119 | 845  | 1537 | 1236 | 204 | 1896 | 861  | 1577 | 942  | 207 | 3505 | 1065 | 2281 | 1570 |
| 5 | 2 | 2 | 3  | hsa_miR_139     | mo-miR-139    | 3645 | 968  | 2297 | 1344 | 210 | 1878 | 543  | 1676 | 941  | 209 | 2937 | 762  | 1973 | 1083 | 203 | 2056 | 631  | 1616 | 978  | 208 | 2982 | 935  | 2055 | 1373 |
| 5 | 2 | 2 | 4  | hsa_miR_141     | mo-miR-141    | 4210 | 1328 | 2456 | 1356 | 205 | 3664 | 522  | 3345 | 1030 | 210 | 3793 | 810  | 3378 | 1327 | 209 | 5887 | 798  | 4910 | 1146 | 213 | 2984 | 572  | 2815 | 998  |
| 5 | 2 | 2 | 5  | hsa_miR_142_5p  | mo-miR-142-5p | 2863 | 912  | 2307 | 1385 | 207 | 2620 | 802  | 2112 | 1073 | 206 | 3210 | 833  | 2604 | 1344 | 204 | 4268 | 1874 | 2809 | 1964 | 205 | 2279 | 544  | 2200 | 886  |
| 5 | 2 | 2 | 6  | hsa_miR_144     | mo-miR-144    | 2885 | 1061 | 1311 | 1527 | 204 | 1817 | 410  | 2016 | 816  | 213 | 2057 | 698  | 1604 | 1138 | 205 | 7408 | 2808 | 1348 | 2432 | 180 | 3163 | 1247 | 2155 | 1591 |
| 5 | 2 | 2 | 7  | hsa_miR_29c     | mo-miR-29c    | 4527 | 769  | 3343 | 1023 | 202 | 1920 | 488  | 1892 | 910  | 209 | 2312 | 536  | 2199 | 1021 | 209 | 7230 | 2323 | 3553 | 2177 | 202 | 3843 | 1181 | 2360 | 1754 |
| 5 | 2 | 2 | 8  | hsa_miR_302a    |               | 1667 | 509  | 1284 | 894  | 208 | 1985 | 812  | 1245 | 1210 | 201 | 1603 | 455  | 1698 | 836  | 209 | 2624 | 874  | 1964 | 1212 | 206 | 2370 | 970  | 1768 | 1729 |
| 5 | 2 | 2 | 9  | hsa_miR_302b_AS |               | 3249 | 1186 | 1564 | 1498 | 199 | 1403 | 475  | 1152 | 848  | 207 | 2077 | 657  | 1719 | 920  | 207 | 2168 | 958  | 1355 | 1442 | 205 | 2885 | 927  | 2045 | 1264 |
| 5 | 2 | 2 | 10 | hsa_miR_302c_AS |               | 2293 | 707  | 2016 | 1016 | 206 | 1647 | 768  | 1291 | 1084 | 207 | 1836 | 510  | 1629 | 749  | 207 | 1716 | 659  | 1282 | 981  | 211 | 4522 | 1531 | 1926 | 1961 |
| 5 | 2 | 2 | 11 | hsa_miR_30a_3p  | mo-miR-30a-3p | 2821 | 748  | 1913 | 971  | 201 | 1534 | 604  | 1371 | 954  | 210 | 2760 | 665  | 2191 | 853  | 201 | 2589 | 753  | 2088 | 1040 | 203 | 5541 | 1050 | 2637 | 1373 |
| 5 | 2 | 2 | 12 | hsa_miR_30b     | mo-miR-30b    | 3386 | 666  | 2918 | 1106 | 210 | 2237 | 598  | 2372 | 705  | 209 | 3035 | 590  | 2451 | 824  | 205 | 4480 | 843  | 3744 | 1258 | 203 | 3568 | 1036 | 3303 | 1424 |
| 5 | 2 | 2 | 13 | mmu_miR_290     | mo-miR-290    | 2261 | 1036 | 1336 | 1464 | 209 | 1508 | 542  | 1388 | 909  | 205 | 1836 | 774  | 1352 | 1136 | 208 | 1759 | 816  | 1448 | 1246 | 206 | 2643 | 945  | 2283 | 1476 |
| 5 | 2 | 2 | 14 | mmu_miR_291_5p  | mo-miR-291-5p | 3164 | 1342 | 1750 | 1588 | 203 | 1916 | 839  | 1403 | 1505 | 209 | 1531 | 773  | 1357 | 1270 | 211 | 2179 | 755  | 1540 | 939  | 203 | 3160 | 1611 | 1895 | 2004 |
| 5 | 2 | 2 | 15 | mmu_miR_292_5p  | mo-miR-292-5p | 1868 | 748  | 1385 | 1218 | 207 | 1817 | 704  | 1405 | 1135 | 208 | 1848 | 770  | 1647 | 1364 | 210 | 1907 | 638  | 1517 | 859  | 207 | 2455 | 866  | 1944 | 1335 |
| 5 | 2 | 2 | 16 | mmu_miR_294     |               | 1926 | 1230 | 1662 | 3810 | 209 | 1675 | 628  | 1429 | 1261 | 206 | 2182 | 688  | 1786 | 1306 | 210 | 1767 | 700  | 2559 | 1561 | 206 | 2950 | 1127 | 2293 | 1659 |
| 5 | 2 | 2 | 17 | mmu_miR_297     |               | 3959 | 1328 | 1688 | 1458 | 209 | 1570 | 583  | 1311 | 942  | 211 | 3015 | 841  | 2276 | 1215 | 211 | 1918 | 919  | 1519 | 1567 | 203 | 3916 | 1221 | 2546 | 1619 |
| 5 | 2 | 2 | 18 | mmu_miR_300     | mo-miR-300    | 3890 | 1278 | 4075 | 1621 | 209 | 1844 | 592  | 1344 | 855  | 207 | 1824 | 623  | 1538 | 916  | 209 | 1743 | 707  | 1329 | 1215 | 205 | 3383 | 1441 | 2358 | 2015 |
| 5 | 2 | 2 | 19 | hsa_miR_520a_AS |               | 2329 | 892  | 1600 | 1330 | 208 | 1153 | 465  | 1562 | 922  | 209 | 1899 | 792  | 1143 | 1188 | 203 | 1573 | 575  | 1439 | 852  | 208 | 3012 | 1043 | 4561 | 1577 |
| 5 | 2 | 2 | 20 | hsa_miR_524_AS  |               | 2218 | 724  | 3732 | 1074 | 208 | 1231 | 479  | 1171 | 935  | 206 | 1810 | 760  | 1518 | 1273 | 209 | 2265 | 691  | 1902 | 1043 | 207 | 3128 | 876  | 1789 | 1006 |
| 5 | 2 | 2 | 21 | hsa_miR_527     |               | 2400 | 887  | 3367 | 1282 | 207 | 1424 | 744  | 943  | 1146 | 209 | 2871 | 980  | 1697 | 1358 | 199 | 1587 | 441  | 1336 | 815  | 208 | 3058 | 873  | 2149 | 1190 |
| 5 | 2 | 2 | 22 | hsa_miR_519a_AS |               | 2523 | 625  | 4582 | 1126 | 209 | 1677 | 651  | 1262 | 1164 | 204 | 1990 | 638  | 1551 | 1144 | 206 | 1287 | 534  | 1297 | 1051 | 211 | 2991 | 1237 | 1568 | 1607 |
| 5 | 2 | 2 | 23 | ambi_miR_7055   |               | 2876 | 665  | 4611 | 967  | 208 | 1402 | 617  | 1290 | 1020 | 208 | 1525 | 571  | 1413 | 1185 | 210 | 1427 | 357  | 2070 | 616  | 212 | 2978 | 1139 | 1996 | 1582 |
| 5 | 2 | 2 | 24 | hsa_miR_513     |               | 2403 | 723  | 4099 | 1323 | 210 | 1761 | 626  | 1482 | 994  | 211 | 1749 | 417  | 1749 | 1032 | 212 | 2397 | 741  | 4235 | 1235 | 213 | 2904 | 733  | 2395 | 1197 |
| 5 | 2 | 3 | 1  | hsa_miR_15b     | mo-miR-15b    | 8720 | 1190 | 7120 | 1389 | 204 | 5341 | 731  | 4150 | 1099 | 204 | 8433 | 880  | 8148 | 1664 | 203 | 4739 | 742  | 4421 | 1084 | 209 | 6224 | 1232 | 4197 | 1563 |
| 5 | 2 | 3 | 2  | hsa_miR_17_3p   |               | 3769 | 899  | 2900 | 1210 | 207 | 1741 | 529  | 1537 | 827  | 210 | 2511 | 998  | 1743 | 1429 | 209 | 1676 | 587  | 1277 | 909  | 210 | 3333 | 1062 | 2269 | 1502 |
| 5 | 2 | 3 | 3  | hsa_miR_18a     | mo-miR-18     | 2804 | 711  | 1863 | 913  | 208 | 1648 | 435  | 1532 | 666  | 209 | 1726 | 696  | 1433 | 1105 | 208 | 1533 | 479  | 1347 | 850  | 210 | 2624 | 900  | 2269 | 1449 |
| 5 | 2 | 3 | 4  | hsa_miR_181b    | mo-miR-181b   | 3441 | 980  | 2228 | 1110 | 207 | 2140 | 531  | 1804 | 761  | 204 | 3060 | 881  | 2956 | 1705 | 208 | 4690 | 2400 | 2561 | 3102 | 210 | 2394 | 743  | 2067 | 1220 |
| 5 | 2 | 3 | 5  | hsa_miR_182     |               | 2348 | 669  | 2112 | 970  | 210 | 2643 | 556  | 2077 | 768  | 207 | 3012 | 984  | 2496 | 1562 | 208 | 7286 | 3555 | 1421 | 3321 | 170 | 2524 | 784  | 1895 | 1202 |
| 5 | 2 | 3 | 6  | hsa_miR_183     | mo-miR-183    | 2642 | 828  | 1783 | 1208 | 208 | 2530 | 499  | 2289 | 788  | 210 | 3443 | 954  | 3665 | 1554 | 212 | 8315 | 4054 | 2296 | 3891 | 167 | 2393 | 634  | 2524 | 1041 |
| 5 | 2 | 3 | 7  | hsa_miR_33      | mo-miR-33     | 2311 | 702  | 1542 | 1272 | 205 | 1499 | 254  | 1616 | 428  | 207 | 1958 | 611  | 1494 | 901  | 207 | 4524 | 1942 | 2634 | 2409 | 212 | 2863 | 973  | 2280 | 1491 |
| 5 | 2 | 3 | 8  | hsa_miR_331     | mo-miR-331    | 2522 | 938  | 1706 | 1295 | 206 | 1840 | 767  | 1345 | 1057 | 203 | 2056 | 853  | 1477 | 1161 | 202 | 2037 | 1133 | 1106 | 1881 | 200 | 2209 | 918  | 1836 | 1741 |
| 5 | 2 | 3 | 9  | hsa_miR_337     |               | 1930 | 915  | 1511 | 1209 | 210 | 993  | 495  | 1122 | 989  | 211 | 2528 | 1084 | 1567 | 1676 | 199 | 2125 | 894  | 1371 | 1749 | 204 | 2230 | 951  | 2102 | 1625 |
| 5 | 2 | 3 | 10 | hsa_miR_339     | mo-miR-339    | 2094 | 591  | 1442 | 881  | 208 | 1709 | 511  | 1284 | 816  | 206 | 2102 | 741  | 1419 | 1045 | 203 | 1589 | 758  | 1506 | 1334 | 206 | 4078 | 1332 | 3528 | 1750 |
| 5 | 2 | 3 | 11 | hsa_miR_342     | mo-miR-342    | 2467 | 855  | 1605 | 1265 | 202 | 1607 | 478  | 1459 | 789  | 211 | 2358 | 588  | 1477 | 996  | 203 | 2910 | 783  | 1647 | 986  | 188 | 3022 | 908  | 1840 | 1315 |
| 5 | 2 | 3 | 12 | hsa_miR_346     |               | 2220 | 816  | 1426 | 1482 | 207 | 1465 | 549  | 1347 | 955  | 208 | 2497 | 935  | 1297 | 1008 | 203 | 2365 | 823  | 1104 | 1090 | 191 | 2508 | 895  | 1966 | 2061 |
| 5 | 2 | 3 | 13 | mmu_miR_376a    |               | 2200 | 702  | 1563 | 972  | 206 | 1257 | 597  | 1056 | 887  | 207 | 2133 | 1065 | 1333 | 1585 | 201 | 2179 | 682  | 1441 | 1015 | 202 | 2383 | 796  | 2060 | 1433 |
| 5 | 2 | 3 | 14 | mmu_miR_380_3p  |               | 2589 | 755  | 1581 | 939  | 208 | 1630 | 1015 | 1151 | 1958 | 204 | 2127 | 975  | 1419 | 1579 | 203 | 2062 | 849  | 1569 | 1233 | 208 | 3108 | 845  | 1616 | 1179 |
| 5 | 2 | 3 | 15 | mmu_miR_384     |               | 2293 | 1277 | 1465 | 2118 | 207 | 2165 | 595  | 1581 | 872  | 209 | 2285 | 897  | 1563 | 1350 | 209 | 1905 | 792  | 1256 | 1050 | 202 | 3494 | 1629 | 1740 | 2564 |
| 5 | 2 | 3 | 16 | hsa_miR_410     |               | 2136 | 721  | 1506 | 1163 | 207 | 1649 | 627  | 1040 | 880  | 204 | 2355 | 976  | 1701 | 1355 | 201 | 1818 | 1011 | 1261 | 1630 | 210 | 2256 | 836  | 2488 | 1710 |
| 5 | 2 | 3 | 17 | hsa_miR_412     |               | 3797 | 1455 | 2194 | 1730 | 204 | 2295 | 723  | 1391 | 937  | 204 | 2039 | 790  | 1439 | 1056 | 207 | 2437 | 995  | 1400 | 1228 | 201 | 3066 | 815  | 2329 | 1189 |
| 5 | 2 | 3 | 18 | mmu_miR_7b      | mo-miR-7b     | 2618 | 1122 | 1793 | 1598 | 204 | 1656 | 652  | 1262 | 977  | 204 | 1781 | 577  | 1341 | 811  | 208 | 2141 | 1312 | 1168 |      |     |      |      |      |      |

|   |   |   |    |                 |               |       |      |       |      |     |       |      |       |      |     |       |      |       |      |     |       |      |       |      |      |       |      |       |      |      |
|---|---|---|----|-----------------|---------------|-------|------|-------|------|-----|-------|------|-------|------|-----|-------|------|-------|------|-----|-------|------|-------|------|------|-------|------|-------|------|------|
| 6 | 1 | 1 | 22 | hsa_miR_512_3p  |               | 2772  | 1155 | 1639  | 1632 | 210 | 1332  | 518  | 1212  | 836  | 210 | 1580  | 575  | 1353  | 904  | 209 | 1740  | 436  | 1551  | 807  | 211  | 2700  | 993  | 1772  | 1487 |      |
| 6 | 1 | 1 | 23 | hsa_miR_491     |               | 2856  | 1042 | 1583  | 1381 | 209 | 1394  | 577  | 1380  | 984  | 211 | 1971  | 736  | 1441  | 1501 | 209 | 1555  | 547  | 1573  | 949  | 205  | 2782  | 633  | 2079  | 982  |      |
| 6 | 1 | 1 | 24 | hsa_miR_514     |               | 2532  | 908  | 1540  | 1284 | 208 | 1106  | 492  | 1384  | 1013 | 210 | 1739  | 433  | 1588  | 610  | 210 | 1459  | 743  | 1531  | 1624 | 211  | 3576  | 734  | 7748  | 1278 |      |
| 6 | 1 | 2 | 1  | hsa_miR_135a    | mo-miR-135a   | 3405  | 854  | 2692  | 1101 | 207 | 1467  | 492  | 1226  | 903  | 211 | 4320  | 892  | 1040  | 1382 | 209 | 1803  | 827  | 1612  | 1409 | 208  | 3664  | 1149 | 1981  | 1346 |      |
| 6 | 1 | 2 | 2  | hsa_miR_136     | mo-miR-136    | 3963  | 1378 | 1944  | 1561 | 199 | 1804  | 724  | 1150  | 926  | 204 | 4319  | 1040 | 3843  | 1450 | 209 | 2434  | 819  | 1607  | 1343 | 210  | 6385  | 1660 | 4643  | 2396 |      |
| 6 | 1 | 2 | 3  | hsa_miR_138     | mo-miR-138    | 3275  | 1390 | 2015  | 1702 | 207 | 1437  | 647  | 1182  | 1008 | 209 | 3548  | 1033 | 2970  | 1299 | 205 | 2043  | 659  | 1536  | 1026 | 206  | 3473  | 1188 | 2457  | 1684 |      |
| 6 | 1 | 2 | 4  | hsa_miR_140     | mo-miR-140    | 3092  | 997  | 2228  | 1303 | 212 | 2100  | 454  | 2103  | 700  | 209 | 7416  | 998  | 8526  | 1379 | 208 | 2440  | 674  | 1489  | 885  | 204  | 2854  | 905  | 1582  | 1444 |      |
| 6 | 1 | 2 | 5  | hsa_miR_142_3p  | mo-miR-142-3p | 5379  | 1205 | 5036  | 1681 | 203 | 2265  | 698  | 1689  | 1279 | 208 | 4749  | 1213 | 4522  | 2021 | 210 | 2224  | 808  | 1513  | 1047 | 208  | 6167  | 1240 | 5104  | 1515 |      |
| 6 | 1 | 2 | 6  | hsa_miR_143     | mo-miR-143    | 6656  | 1013 | 6868  | 1146 | 206 | 5653  | 388  | 6729  | 633  | 211 | 8456  | 775  | 9175  | 1065 | 208 | 5788  | 770  | 7029  | 1248 | 207  | 5669  | 1128 | 4633  | 1466 |      |
| 6 | 1 | 2 | 7  | hsa_miR_29b     | mo-miR-29b    | 5431  | 1754 | 3854  | 3089 | 205 | 2605  | 594  | 2373  | 1221 | 209 | 2731  | 710  | 2209  | 1053 | 206 | 3083  | 556  | 3244  | 803  | 209  | 3369  | 853  | 2508  | 1301 |      |
| 6 | 1 | 2 | 8  | hsa_miR_301     |               | 3256  | 1014 | 1675  | 1374 | 205 | 2912  | 575  | 2950  | 755  | 206 | 2599  | 1012 | 1467  | 1699 | 206 | 2417  | 718  | 1826  | 961  | 208  | 3528  | 1079 | 4805  | 2099 |      |
| 6 | 1 | 2 | 9  | hsa_miR_302b    |               | 3610  | 1232 | 1663  | 1450 | 208 | 2048  | 807  | 1544  | 1158 | 200 | 2426  | 611  | 1629  | 851  | 208 | 1688  | 701  | 1514  | 1115 | 209  | 3183  | 1090 | 2027  | 2151 |      |
| 6 | 1 | 2 | 10 | hsa_miR_302c    |               | 3783  | 1144 | 2022  | 1402 | 208 | 2956  | 481  | 3101  | 776  | 208 | 3024  | 805  | 2444  | 1291 | 209 | 1946  | 766  | 1581  | 1136 | 209  | 3366  | 1471 | 1791  | 1916 |      |
| 6 | 1 | 2 | 11 | hsa_miR_302d    |               | 3124  | 598  | 2794  | 920  | 212 | 7157  | 1744 | 7282  | 3408 | 197 | 3361  | 793  | 3032  | 1348 | 209 | 2073  | 764  | 1540  | 1299 | 209  | 2999  | 1115 | 2307  | 1966 |      |
| 6 | 1 | 2 | 12 | hsa_miR_30a_5p  | mo-miR-30a-5p | 13441 | 1103 | 13754 | 1580 | 206 | 15058 | 2074 | 13804 | 4127 | 204 | 16474 | 738  | 15990 | 962  | 207 | 17802 | 849  | 18808 | 1340 | 209  | 22760 | 1243 | 19704 | 1595 |      |
| 6 | 1 | 2 | 13 | mmu_miR_217     | mo-miR-217    | 5110  | 1400 | 3967  | 1795 | 206 | 2053  | 964  | 1309  | 1100 | 206 | 3978  | 816  | 3794  | 1139 | 206 | 2651  | 1050 | 1859  | 1502 | 204  | 2759  | 937  | 1856  | 1555 |      |
| 6 | 1 | 2 | 14 | mmu_miR_291_3p  | mo-miR-291-3p | 2963  | 977  | 1661  | 1282 | 204 | 1682  | 1065 | 1278  | 274  | 207 | 3418  | 1305 | 2989  | 2672 | 210 | 1740  | 673  | 1246  | 981  | 206  | 2228  | 535  | 1895  | 998  |      |
| 6 | 1 | 2 | 15 | mmu_miR_292_3p  | mo-miR-292-3p | 3622  | 1258 | 1511  | 1240 | 205 | 1495  | 927  | 1412  | 2418 | 210 | 2732  | 2240 | 1342  | 4336 | 205 | 1560  | 614  | 1630  | 1065 | 208  | 3178  | 977  | 1614  | 1583 |      |
| 6 | 1 | 2 | 16 | mmu_miR_293     |               | 2750  | 984  | 1326  | 1114 | 207 | 2714  | 728  | 1351  | 771  | 199 | 1897  | 623  | 1802  | 1230 | 210 | 1685  | 519  | 1148  | 866  | 207  | 2198  | 988  | 2279  | 1428 |      |
| 6 | 1 | 2 | 17 | mmu_miR_295     |               | 2707  | 987  | 1912  | 1344 | 210 | 1351  | 487  | 1262  | 876  | 209 | 2607  | 709  | 4399  | 1062 | 210 | 1338  | 572  | 1388  | 1021 | 209  | 3508  | 1108 | 2234  | 1526 |      |
| 6 | 1 | 2 | 18 | mmu_miR_298     | mo-miR-298    | 3052  | 923  | 2028  | 1230 | 209 | 2184  | 276  | 2683  | 590  | 210 | 3177  | 824  | 2118  | 1019 | 205 | 1849  | 566  | 1761  | 1001 | 210  | 3133  | 985  | 2595  | 1517 |      |
| 6 | 1 | 2 | 19 | hsa_miR_526b    |               | 2964  | 1079 | 2588  | 1526 | 214 | 1432  | 462  | 1242  | 801  | 205 | 2432  | 1171 | 1842  | 2289 | 207 | 2595  | 1055 | 1715  | 1318 | 204  | 3627  | 658  | 2152  | 907  |      |
| 6 | 1 | 2 | 20 | hsa_miR_525     |               | 3058  | 1244 | 1500  | 1810 | 207 | 1401  | 615  | 1098  | 1044 | 206 | 2295  | 1158 | 1473  | 1716 | 205 | 1692  | 707  | 1269  | 1107 | 204  | 2094  | 563  | 1671  | 914  |      |
| 6 | 1 | 2 | 21 | hsa_miR_520d_AS |               | 3172  | 1384 | 1290  | 1669 | 204 | 1470  | 588  | 1318  | 838  | 208 | 2395  | 805  | 1922  | 1214 | 205 | 3272  | 861  | 6333  | 1220 | 204  | 2155  | 841  | 1571  | 1230 |      |
| 6 | 1 | 2 | 22 | hsa_miR_515_5p  |               | 2187  | 1008 | 1164  | 1392 | 208 | 1745  | 612  | 1438  | 804  | 208 | 1727  | 649  | 1480  | 1056 | 211 | 2077  | 728  | 1359  | 966  | 202  | 3553  | 1096 | 1981  | 1448 |      |
| 6 | 1 | 2 | 23 | ambi_miR_7054   |               | 2566  | 1036 | 1653  | 1536 | 211 | 1475  | 707  | 1267  | 1116 | 207 | 2164  | 770  | 1540  | 1483 | 877 | 209   | 2164 | 775   | 1350 | 1056 | 203   | 4018 | 1187  | 5120 | 1555 |
| 6 | 1 | 2 | 24 | hsa_miR_498     |               | 3153  | 1212 | 1182  | 1436 | 203 | 1456  | 433  | 1264  | 718  | 209 | 1475  | 429  | 1611  | 1024 | 214 | 3450  | 836  | 6540  | 1292 | 202  | 4301  | 1723 | 1885  | 1987 |      |
| 6 | 1 | 3 | 1  | hsa_miR_15a     |               | 3286  | 1261 | 2615  | 2405 | 210 | 5054  | 494  | 7116  | 1023 | 209 | 4631  | 1012 | 3464  | 1298 | 206 | 3252  | 895  | 1239  | 1315 | 207  | 3357  | 1094 | 2480  | 1662 |      |
| 6 | 1 | 3 | 2  | hsa_miR_16      | mo-miR-16     | 20798 | 1539 | 19290 | 2311 | 199 | 13769 | 620  | 12527 | 878  | 207 | 12744 | 1260 | 12781 | 1556 | 205 | 8578  | 756  | 8657  | 1200 | 207  | 11928 | 1082 | 10103 | 2376 |      |
| 6 | 1 | 3 | 3  | hsa_miR_17_5p   | mo-miR-17     | 5341  | 1482 | 3249  | 1803 | 196 | 5468  | 868  | 4665  | 1126 | 204 | 4288  | 825  | 3654  | 1179 | 209 | 3282  | 980  | 2072  | 1227 | 206  | 4032  | 1670 | 2842  | 1757 |      |
| 6 | 1 | 3 | 4  | hsa_miR_181a    | mo-miR-181a   | 3903  | 1157 | 2449  | 1573 | 206 | 4322  | 579  | 4383  | 868  | 211 | 6912  | 798  | 6580  | 1019 | 204 | 3331  | 584  | 3489  | 855  | 210  | 3523  | 1333 | 2088  | 1943 |      |
| 6 | 1 | 3 | 5  | hsa_miR_181c    | mo-miR-181c   | 2625  | 903  | 1515  | 1154 | 209 | 2090  | 939  | 1561  | 1336 | 202 | 2510  | 658  | 1923  | 1048 | 204 | 2024  | 685  | 1481  | 1043 | 205  | 2301  | 576  | 1935  | 802  |      |
| 6 | 1 | 3 | 6  | hsa_miR_182_AS  |               | 2514  | 925  | 1726  | 1290 | 209 | 1648  | 452  | 1640  | 850  | 211 | 3201  | 908  | 3376  | 1522 | 210 | 2238  | 578  | 1372  | 695  | 203  | 2415  | 896  | 1821  | 1529 |      |
| 6 | 1 | 3 | 7  | hsa_miR_328     | mo-miR-328    | 3008  | 811  | 1517  | 1003 | 202 | 1242  | 498  | 1101  | 959  | 210 | 1931  | 800  | 1478  | 1316 | 209 | 2188  | 585  | 1460  | 770  | 207  | 3428  | 1248 | 1707  | 1642 |      |
| 6 | 1 | 3 | 8  | hsa_miR_330     |               | 3187  | 904  | 1705  | 1171 | 205 | 1912  | 581  | 1157  | 742  | 199 | 2239  | 1104 | 1645  | 1635 | 208 | 1391  | 702  | 1524  | 1213 | 207  | 3101  | 1050 | 2020  | 1513 |      |
| 6 | 1 | 3 | 9  | hsa_miR_335     | mo-miR-335    | 3109  | 1131 | 1953  | 1542 | 209 | 1866  | 528  | 1472  | 818  | 207 | 2860  | 777  | 2243  | 1060 | 209 | 2288  | 896  | 1683  | 1342 | 207  | 2608  | 824  | 2178  | 1272 |      |
| 6 | 1 | 3 | 10 | hsa_miR_338     | mo-miR-338    | 2906  | 1278 | 1487  | 1582 | 207 | 1595  | 517  | 1115  | 768  | 204 | 1820  | 747  | 1266  | 1014 | 207 | 2690  | 905  | 2443  | 1392 | 205  | 3001  | 1121 | 2048  | 1560 |      |
| 6 | 1 | 3 | 11 | hsa_miR_340     | mo-miR-340    | 2987  | 870  | 1751  | 1083 | 206 | 4895  | 1017 | 5047  | 1687 | 199 | 2111  | 587  | 1776  | 831  | 206 | 1449  | 387  | 1559  | 707  | 208  | 3783  | 1241 | 2038  | 1521 |      |
| 6 | 1 | 3 | 12 | hsa_miR_345     |               | 2965  | 868  | 1736  | 984  | 208 | 3039  | 1582 | 2626  | 3749 | 208 | 2301  | 538  | 2891  | 1071 | 212 | 1987  | 474  | 1559  | 765  | 208  | 7800  | 1143 | 7747  | 1706 |      |
| 6 | 1 | 3 | 13 | mmu_miR_351     | mo-miR-351    | 2994  | 1002 | 1622  | 1001 | 203 | 1686  | 741  | 1118  | 1304 | 208 | 3096  | 730  | 2655  | 1077 | 211 | 2217  | 744  | 1548  | 1243 | 204  | 2558  | 991  | 1936  | 1698 |      |
| 6 | 1 | 3 | 14 | mmu_miR_376b    |               | 3106  | 912  | 1830  | 1089 | 202 | 1563  | 613  | 1290  | 904  | 205 | 2623  | 1023 | 1849  | 1587 | 209 | 2031  | 676  | 1309  | 936  | 203  | 1886  | 597  | 1452  | 990  |      |
| 6 | 1 | 3 | 15 | mmu_miR_383     |               | 2844  | 1152 | 1296  | 1659 | 204 | 1579  | 501  | 1189  | 875  | 207 | 4473  | 1947 | 3483  | 4057 | 201 | 1826  | 571  | 1296  | 874  | 211  | 2527  | 980  | 1797  | 1377 |      |
| 6 | 1 | 3 | 16 | mmu_miR_409     |               | 2988  | 1144 | 1412  | 1530 | 208 | 2043  | 576  | 1340  | 797  | 202 | 1759  | 618  | 1400  | 1243 | 210 | 1453  | 471  | 1142  | 708  | 207  | 3489  | 1403 | 2283  | 1649 |      |
| 6 | 1 | 3 | 17 | mmu_miR_411     |               | 6503  | 1345 | 5502  | 1645 | 201 | 1836  | 527  | 1513  | 747  | 205 | 1783  | 507  | 1389  | 814  | 205 | 1316  | 403  | 1186  | 706  | 209  | 4964  | 1399 | 3233  | 1655 |      |
| 6 | 1 | 3 | 18 | mmu_miR_429     | mo-miR-429    | 5665  | 1161 | 4057  | 1918 | 208 | 5130  | 524  | 4902  | 826  | 207 | 6036  | 1013 | 5065  | 1242 | 203 | 7100  | 594  | 8460  | 1486 | 206  | 5978  | 1082 | 5113  | 1472 |      |
| 6 | 1 | 3 | 19 | ambi_miR_7070   |               | 3531  | 1324 | 1780  | 1617 | 202 | 2191  | 407  | 2422  | 644  | 210 | 2770  | 1108 | 1747  | 1705 | 201 | 2282  | 765  | 1371  | 1524 | 208  | 3415  | 850  | 2605  | 1043 |      |
| 6 | 1 | 3 | 20 | hsa_miR_490     |               | 3178  | 1186 | 2262  | 1641 | 212 | 1765  | 628  | 1910  | 1255 | 210 | 1840  | 545  | 1950  | 1119 | 207 | 2059  | 768  | 1454  | 1182 | 209  | 2948  | 794  | 2271  | 1100 |      |
| 6 | 1 | 3 | 21 | ambi_miR_7074   |               | 2622  | 1289 | 1768  | 1772 | 204 | 1285  | 444  | 1251  | 699  | 211 | 1659  |      |       |      |     |       |      |       |      |      |       |      |       |      |      |

|   |   |   |    |                 |                |      |      |       |      |     |      |     |      |      |     |      |      |      |      |     |      |     |      |      |     |      |      |      |      |
|---|---|---|----|-----------------|----------------|------|------|-------|------|-----|------|-----|------|------|-----|------|------|------|------|-----|------|-----|------|------|-----|------|------|------|------|
| 6 | 2 | 2 | 1  | hsa_miR_135b    | mo-miR-135b    | 2548 | 725  | 1772  | 1270 | 212 | 1426 | 596 | 1144 | 1010 | 212 | 2133 | 451  | 1901 | 729  | 213 | 2214 | 804 | 1471 | 1254 | 203 | 3204 | 876  | 2352 | 1482 |
| 6 | 2 | 2 | 2  | hsa_miR_137     | mo-miR-137     | 2969 | 948  | 2245  | 2107 | 208 | 2719 | 783 | 1940 | 1078 | 208 | 2426 | 802  | 1794 | 1354 | 209 | 1629 | 554 | 1546 | 937  | 208 | 3780 | 1006 | 2936 | 1477 |
| 6 | 2 | 2 | 3  | hsa_miR_139     | mo-miR-139     | 3524 | 1102 | 2339  | 1536 | 201 | 2146 | 486 | 2118 | 715  | 208 | 2981 | 860  | 2195 | 1707 | 207 | 1863 | 717 | 1474 | 1261 | 207 | 3120 | 725  | 2490 | 1374 |
| 6 | 2 | 2 | 4  | hsa_miR_141     | mo-miR-141     | 4498 | 821  | 3792  | 1105 | 210 | 3926 | 852 | 3113 | 1194 | 205 | 3836 | 1050 | 3238 | 1758 | 209 | 2718 | 536 | 2180 | 986  | 211 | 3858 | 934  | 3077 | 1408 |
| 6 | 2 | 2 | 5  | hsa_miR_142_5p  | mo-miR-142-5p  | 2787 | 805  | 2312  | 1306 | 213 | 2932 | 796 | 2465 | 1216 | 207 | 3272 | 850  | 2289 | 1185 | 206 | 2205 | 527 | 1929 | 960  | 209 | 4116 | 1169 | 3728 | 1779 |
| 6 | 2 | 2 | 6  | hsa_miR_144     | mo-miR-144     | 2308 | 853  | 1682  | 1217 | 210 | 2069 | 618 | 2183 | 1117 | 208 | 2396 | 830  | 1762 | 1424 | 210 | 1888 | 549 | 1303 | 885  | 205 | 4555 | 1807 | 2907 | 3381 |
| 6 | 2 | 2 | 7  | hsa_miR_29c     | mo-miR-29c     | 2958 | 1180 | 2365  | 2094 | 207 | 2267 | 740 | 2166 | 2013 | 210 | 2666 | 739  | 2143 | 1160 | 207 | 2950 | 774 | 2469 | 1336 | 209 | 3646 | 829  | 3148 | 1251 |
| 6 | 2 | 2 | 8  | hsa_miR_302a    | mo-miR-302a    | 2620 | 983  | 1845  | 1343 | 204 | 1883 | 737 | 1519 | 1116 | 204 | 2307 | 777  | 1753 | 1189 | 206 | 1746 | 838 | 1486 | 1349 | 205 | 4132 | 2074 | 2954 | 7075 |
| 6 | 2 | 2 | 9  | hsa_miR_302c_AS | mo-miR-302c_AS | 1538 | 697  | 1400  | 1228 | 209 | 2830 | 740 | 1466 | 842  | 196 | 2300 | 728  | 1176 | 915  | 201 | 1985 | 835 | 1056 | 1214 | 199 | 3735 | 2863 | 2228 | 7821 |
| 6 | 2 | 2 | 10 | hsa_miR_302c_AS | mo-miR-302c_AS | 2604 | 855  | 1557  | 1192 | 207 | 2114 | 465 | 1962 | 649  | 205 | 2472 | 733  | 1579 | 1106 | 205 | 2347 | 777 | 1608 | 1007 | 204 | 4983 | 1899 | 3315 | 2907 |
| 6 | 2 | 2 | 11 | hsa_miR_30a_3p  | mo-miR-30a-3p  | 2336 | 730  | 1982  | 1231 | 209 | 2200 | 674 | 1727 | 1394 | 208 | 3233 | 1022 | 2326 | 1559 | 207 | 2547 | 737 | 1710 | 1104 | 205 | 3798 | 1188 | 4679 | 1662 |
| 6 | 2 | 2 | 12 | hsa_miR_30b     | mo-miR-30b     | 3864 | 465  | 4025  | 675  | 206 | 2674 | 330 | 2854 | 649  | 210 | 3432 | 681  | 2573 | 934  | 207 | 3974 | 512 | 3990 | 929  | 209 | 3852 | 816  | 3434 | 1487 |
| 6 | 2 | 2 | 13 | mmu_miR_290     | mo-miR-290     | 2087 | 649  | 1607  | 948  | 208 | 1034 | 380 | 1177 | 759  | 210 | 2210 | 900  | 1485 | 1379 | 206 | 2074 | 667 | 1411 | 1073 | 209 | 2132 | 837  | 1394 | 1396 |
| 6 | 2 | 2 | 14 | mmu_miR_291_5p  | mo-miR-291-5p  | 2543 | 808  | 1478  | 968  | 209 | 1459 | 596 | 1275 | 1073 | 206 | 2265 | 958  | 1391 | 1278 | 205 | 1523 | 384 | 1540 | 777  | 210 | 4009 | 1355 | 2055 | 1636 |
| 6 | 2 | 2 | 15 | mmu_miR_292_5p  | mo-miR-292-5p  | 1704 | 472  | 1729  | 799  | 211 | 1164 | 428 | 905  | 713  | 204 | 2242 | 834  | 1645 | 1194 | 208 | 1671 | 661 | 1441 | 987  | 211 | 3590 | 1099 | 3735 | 1569 |
| 6 | 2 | 2 | 16 | mmu_miR_294     | mo-miR-294     | 2979 | 888  | 1605  | 1258 | 201 | 2312 | 716 | 2097 | 1131 | 208 | 2897 | 861  | 2455 | 1154 | 205 | 1677 | 589 | 1327 | 1038 | 206 | 3396 | 1348 | 4017 | 1879 |
| 6 | 2 | 2 | 17 | mmu_miR_297     | mo-miR-297     | 2549 | 1360 | 1611  | 2107 | 207 | 2921 | 608 | 2144 | 813  | 207 | 3587 | 972  | 3134 | 1290 | 205 | 1644 | 567 | 1262 | 1152 | 211 | 3987 | 1146 | 2451 | 1201 |
| 6 | 2 | 2 | 18 | mmu_miR_300     | mo-miR-300     | 1912 | 1024 | 1276  | 1558 | 209 | 1908 | 685 | 1513 | 919  | 206 | 2019 | 615  | 1561 | 788  | 205 | 1549 | 639 | 1528 | 1117 | 207 | 2714 | 762  | 2188 | 1273 |
| 6 | 2 | 2 | 19 | hsa_miR_520a_AS | mo-miR-520a_AS | 2235 | 927  | 1295  | 1358 | 209 | 1563 | 475 | 1286 | 795  | 209 | 2342 | 860  | 1252 | 1032 | 202 | 1251 | 480 | 1366 | 1069 | 212 | 1994 | 928  | 1706 | 1646 |
| 6 | 2 | 2 | 20 | hsa_miR_524_AS  | mo-miR-524_AS  | 2248 | 783  | 1572  | 1022 | 207 | 2520 | 812 | 5336 | 1124 | 209 | 1746 | 717  | 1487 | 1010 | 209 | 2308 | 777 | 1424 | 1069 | 203 | 3632 | 977  | 5307 | 1025 |
| 6 | 2 | 2 | 21 | hsa_miR_527     | mo-miR-527     | 1968 | 794  | 1579  | 1378 | 211 | 1660 | 576 | 1500 | 1145 | 208 | 1798 | 829  | 1189 | 1209 | 209 | 2141 | 969 | 1071 | 1261 | 205 | 2287 | 785  | 2195 | 1279 |
| 6 | 2 | 2 | 22 | hsa_miR_519a_AS | mo-miR-519a_AS | 1958 | 721  | 1704  | 1208 | 212 | 1368 | 446 | 1365 | 834  | 208 | 2110 | 725  | 1620 | 1044 | 207 | 2169 | 932 | 1262 | 1392 | 208 | 2687 | 826  | 1987 | 1362 |
| 6 | 2 | 2 | 23 | ambi_miR_7055   | mo-miR-7055    | 2275 | 716  | 1498  | 925  | 205 | 1453 | 565 | 1402 | 871  | 211 | 2074 | 765  | 1489 | 1137 | 209 | 2396 | 819 | 1629 | 1240 | 207 | 2892 | 977  | 2014 | 1617 |
| 6 | 2 | 2 | 24 | hsa_miR_513     | mo-miR-513     | 1962 | 517  | 1661  | 799  | 212 | 1598 | 567 | 1434 | 891  | 214 | 2094 | 672  | 1542 | 933  | 210 | 1635 | 513 | 1637 | 695  | 208 | 2894 | 695  | 1797 | 1102 |
| 6 | 2 | 3 | 1  | hsa_miR_15b     | mo-miR-15b     | 6300 | 849  | 4800  | 1309 | 209 | 5265 | 602 | 4116 | 866  | 206 | 5698 | 815  | 4482 | 1336 | 206 | 4394 | 489 | 3915 | 806  | 205 | 5666 | 1021 | 4471 | 1668 |
| 6 | 2 | 3 | 2  | hsa_miR_17_3p   | mo-miR-17-3p   | 3073 | 715  | 2332  | 1080 | 206 | 1745 | 367 | 1664 | 1132 | 210 | 2619 | 714  | 2327 | 1122 | 210 | 1496 | 528 | 1279 | 903  | 209 | 4337 | 1362 | 2867 | 2111 |
| 6 | 2 | 3 | 3  | hsa_miR_18a     | mo-miR-18a     | 2443 | 911  | 1550  | 1352 | 209 | 2343 | 657 | 1663 | 1073 | 201 | 2364 | 813  | 2149 | 1309 | 207 | 1766 | 850 | 1559 | 1365 | 202 | 3322 | 1164 | 2032 | 1400 |
| 6 | 2 | 3 | 4  | hsa_miR_181b    | mo-miR-181b    | 5557 | 777  | 10025 | 987  | 211 | 2799 | 945 | 2004 | 1331 | 203 | 2999 | 735  | 2217 | 909  | 205 | 2791 | 792 | 2122 | 1168 | 208 | 3787 | 787  | 2447 | 1019 |
| 6 | 2 | 3 | 5  | hsa_miR_182     | mo-miR-182     | 2602 | 923  | 2185  | 1460 | 209 | 2394 | 638 | 2126 | 1078 | 205 | 3174 | 995  | 2114 | 1586 | 204 | 3282 | 984 | 2288 | 1515 | 197 | 4801 | 862  | 3021 | 1253 |
| 6 | 2 | 3 | 6  | hsa_miR_183     | mo-miR-183     | 2155 | 635  | 1822  | 1156 | 211 | 1625 | 308 | 2219 | 581  | 209 | 2289 | 1015 | 1895 | 1565 | 205 | 2088 | 620 | 1666 | 947  | 207 | 3201 | 1124 | 3036 | 2030 |
| 6 | 2 | 3 | 7  | hsa_miR_33      | mo-miR-33      | 2475 | 1003 | 1483  | 1265 | 201 | 1482 | 419 | 1375 | 659  | 212 | 2774 | 791  | 2002 | 1159 | 202 | 2011 | 947 | 1518 | 1497 | 205 | 2850 | 665  | 2241 | 924  |
| 6 | 2 | 3 | 8  | hsa_miR_331     | mo-miR-331     | 2860 | 881  | 1633  | 1365 | 208 | 1910 | 682 | 1337 | 1017 | 200 | 2316 | 771  | 1991 | 1327 | 207 | 1467 | 355 | 1572 | 648  | 211 | 3067 | 1044 | 1913 | 1422 |
| 6 | 2 | 3 | 9  | hsa_miR_337     | mo-miR-337     | 2902 | 1007 | 1953  | 1483 | 200 | 1867 | 506 | 1440 | 760  | 211 | 2007 | 598  | 1574 | 899  | 206 | 1914 | 626 | 1458 | 1109 | 210 | 2300 | 1110 | 1726 | 1568 |
| 6 | 2 | 3 | 10 | hsa_miR_339     | mo-miR-339     | 2199 | 812  | 1472  | 1091 | 209 | 1388 | 459 | 1371 | 1276 | 211 | 2253 | 683  | 1870 | 1055 | 210 | 2178 | 740 | 1241 | 932  | 199 | 3868 | 1377 | 2179 | 1813 |
| 6 | 2 | 3 | 11 | hsa_miR_342     | mo-miR-342     | 2579 | 957  | 1840  | 1671 | 205 | 2001 | 584 | 1696 | 868  | 206 | 3504 | 977  | 2786 | 1494 | 207 | 1860 | 498 | 1814 | 895  | 211 | 2902 | 950  | 2058 | 1301 |
| 6 | 2 | 3 | 12 | hsa_miR_346     | mo-miR-346     | 2190 | 501  | 3719  | 758  | 210 | 1449 | 514 | 1054 | 817  | 207 | 1572 | 536  | 1358 | 938  | 211 | 1250 | 437 | 1807 | 1036 | 209 | 2706 | 867  | 1952 | 1154 |
| 6 | 2 | 3 | 13 | mmu_miR_378a    | mo-miR-378a    | 1926 | 756  | 1597  | 1385 | 210 | 2000 | 736 | 1232 | 1008 | 203 | 1832 | 658  | 1390 | 1014 | 210 | 1479 | 660 | 1377 | 1205 | 210 | 2563 | 1100 | 1985 | 1714 |
| 6 | 2 | 3 | 14 | mmu_miR_380_3p  | mo-miR-380_3p  | 2100 | 829  | 1288  | 1222 | 204 | 1361 | 583 | 1250 | 996  | 204 | 2707 | 849  | 1376 | 1097 | 201 | 1793 | 703 | 1381 | 976  | 205 | 2492 | 844  | 1899 | 1285 |
| 6 | 2 | 3 | 15 | mmu_miR_384     | mo-miR-384     | 2343 | 1006 | 1601  | 1656 | 208 | 1214 | 505 | 1194 | 873  | 210 | 2592 | 888  | 1660 | 1379 | 201 | 1666 | 691 | 1444 | 988  | 209 | 3571 | 1039 | 2420 | 1455 |
| 6 | 2 | 3 | 16 | hsa_miR_410     | mo-miR-410     | 3206 | 1132 | 1108  | 1268 | 202 | 1284 | 575 | 1243 | 959  | 209 | 2061 | 988  | 1273 | 1302 | 202 | 1456 | 504 | 1424 | 809  | 208 | 2835 | 1244 | 1744 | 1836 |
| 6 | 2 | 3 | 17 | hsa_miR_412     | mo-miR-412     | 1991 | 950  | 1265  | 1298 | 209 | 1473 | 647 | 1317 | 1040 | 209 | 2266 | 501  | 2142 | 807  | 209 | 1083 | 233 | 1155 | 504  | 212 | 3133 | 1171 | 2194 | 2181 |
| 6 | 2 | 3 | 18 | mmu_miR_7b      | mo-miR-7b      | 2212 | 799  | 1798  | 1191 | 207 | 1274 | 499 | 1300 | 1013 | 211 | 1641 | 545  | 1354 | 921  | 211 | 1214 | 509 | 1237 | 886  | 209 | 2879 | 1042 | 1779 | 1618 |
| 6 | 2 | 3 | 19 | hsa_miR_492     | mo-miR-492     | 2206 | 635  | 1427  | 912  | 210 | 1419 | 752 | 1167 | 1295 | 210 | 2203 | 934  | 1458 | 1479 | 208 | 2577 | 968 | 1159 | 1524 | 194 | 3620 | 1337 | 4746 | 1877 |
| 6 | 2 | 3 | 20 | hsa_miR_497     | mo-miR-497     | 1959 | 544  | 1582  | 850  | 213 | 2134 | 543 | 1403 | 761  | 205 | 1819 | 551  | 1661 | 852  | 207 | 2314 | 828 | 1824 | 1592 | 209 | 3185 | 2199 | 1634 | 4966 |
| 6 | 2 | 3 | 21 | ambi_miR_7075   | mo-miR-7075    | 2767 | 890  | 4435  | 1529 | 208 | 1263 | 457 | 1283 | 1083 | 209 | 1856 | 592  | 1501 | 924  | 211 | 2367 | 804 | 1536 | 1047 | 199 | 2069 | 567  | 2011 | 1074 |
| 6 | 2 | 3 | 22 | hsa_miR_501     | mo-miR-501     | 1904 | 751  | 1429  | 1196 | 209 | 1592 | 518 | 1296 | 740  | 203 | 1540 | 390  | 1782 | 765  | 211 | 1674 | 688 | 1611 | 1173 | 209 | 3078 | 1199 | 1970 | 1811 |
| 6 | 2 | 3 | 23 | ambi_miR_7079   | mo-miR-7079    | 2026 | 758  | 1990  | 1509 | 208 | 2149 | 784 | 1469 | 1163 | 200 | 1903 | 692  | 1549 | 1072 | 206 | 1526 | 556 | 1628 | 883  | 210 | 4299 | 1    |      |      |



|          | SS-13BN 4% NaCl medulla - 2 |            |              |                  | SS-13BN 4% NaCl medulla - 3 |        |            |              | SS-13BN 4% NaCl medulla - 4 |          |        |            | SS 0.4% NaCl medulla - 1 |                  |          |        | SS 0.4% NaCl medulla - 2 |              |                  |          | SS 0.4% NaCl medulla - 3 |            |              |                  | SS 0.4% N |        |            |       |      |     |       |      |
|----------|-----------------------------|------------|--------------|------------------|-----------------------------|--------|------------|--------------|-----------------------------|----------|--------|------------|--------------------------|------------------|----------|--------|--------------------------|--------------|------------------|----------|--------------------------|------------|--------------|------------------|-----------|--------|------------|-------|------|-----|-------|------|
| Diameter | Signal                      | Background | Signal Stdev | Background Stdev | Diameter                    | Signal | Background | Signal Stdev | Background Stdev            | Diameter | Signal | Background | Signal Stdev             | Background Stdev | Diameter | Signal | Background               | Signal Stdev | Background Stdev | Diameter | Signal                   | Background | Signal Stdev | Background Stdev | Diameter  | Signal | Background |       |      |     |       |      |
| 211      | 10929                       | 1177       | 8260         | 1634             | 210                         | 13403  | 596        | 11705        | 819                         | 210      | 10195  | 1038       | 8175                     | 1728             | 212      | 10459  | 536                      | 11897        | 1116             | 210      | 7205                     | 561        | 10473        | 1689             | 211       | 8389   | 585        | 6661  | 1104 | 205 | 8922  | 1263 |
| 209      | 2620                        | 798        | 1650         | 1059             | 206                         | 9510   | 1205       | 9971         | 1611                        | 209      | 2871   | 762        | 2117                     | 1048             | 209      | 10743  | 749                      | 20546        | 1202             | 205      | 1024                     | 207        | 2150         | 647              | 208       | 1374   | 462        | 1101  | 706  | 208 | 2409  | 932  |
| 207      | 26409                       | 1137       | 22386        | 1524             | 209                         | 18355  | 1020       | 15896        | 1237                        | 204      | 26178  | 845        | 20695                    | 1196             | 210      | 28842  | 732                      | 26822        | 1152             | 209      | 20050                    | 202        | 20883        | 838              | 209       | 21962  | 507        | 24147 | 833  | 209 | 16657 | 972  |
| 207      | 36896                       | 1214       | 24503        | 1281             | 206                         | 28503  | 680        | 21489        | 948                         | 210      | 27551  | 765        | 18079                    | 1020             | 210      | 31478  | 366                      | 23812        | 931              | 208      | 31478                    | 366        | 23812        | 931              | 208       | 24409  | 411        | 19226 | 654  | 204 | 20179 | 931  |
| 209      | 17068                       | 2401       | 15982        | 4965             | 207                         | 13981  | 807        | 11888        | 1065                        | 209      | 12289  | 645        | 10546                    | 927              | 208      | 15263  | 565                      | 16706        | 1191             | 209      | 7138                     | 272        | 6204         | 527              | 204       | 5684   | 477        | 4654  | 758  | 208 | 5345  | 1070 |
| 210      | 8934                        | 1305       | 8618         | 1482             | 211                         | 7889   | 894        | 8264         | 1248                        | 212      | 7216   | 1022       | 5857                     | 1389             | 212      | 8882   | 722                      | 10940        | 1092             | 210      | 7437                     | 225        | 9567         | 545              | 210       | 5941   | 529        | 5869  | 887  | 202 | 5975  | 1196 |
| 210      | 11870                       | 1422       | 7540         | 2023             | 201                         | 6555   | 767        | 5717         | 1098                        | 206      | 14090  | 1556       | 10407                    | 1928             | 205      | 12507  | 1867                     | 13362        | 6021             | 204      | 5135                     | 264        | 4985         | 459              | 208       | 9197   | 537        | 8735  | 847  | 205 | 8089  | 925  |
| 210      | 3659                        | 1393       | 2185         | 1971             | 205                         | 2984   | 670        | 1888         | 965                         | 208      | 3201   | 955        | 2265                     | 1602             | 206      | 2999   | 1851                     | 4413         | 7809             | 213      | 1268                     | 285        | 2899         | 644              | 206       | 1684   | 541        | 1539  | 927  | 208 | 2923  | 1002 |
| 210      | 2929                        | 905        | 1701         | 1202             | 208                         | 3223   | 1248       | 2812         | 2026                        | 207      | 2857   | 912        | 2326                     | 1609             | 212      | 2620   | 697                      | 4180         | 1362             | 208      | 1058                     | 236        | 1285         | 557              | 211       | 1711   | 573        | 1464  | 959  | 207 | 3001  | 877  |
| 205      | 3057                        | 1047       | 1944         | 1496             | 205                         | 3321   | 1158       | 1743         | 1253                        | 205      | 4648   | 1062       | 3936                     | 1402             | 209      | 2564   | 742                      | 5591         | 1653             | 211      | 820                      | 318        | 927          | 694              | 207       | 1455   | 544        | 1338  | 944  | 205 | 2125  | 589  |
| 212      | 3870                        | 1238       | 2311         | 1615             | 209                         | 5320   | 1186       | 3600         | 1293                        | 198      | 2690   | 980        | 2150                     | 1436             | 213      | 3003   | 559                      | 4751         | 1068             | 212      | 1166                     | 157        | 1490         | 291              | 209       | 1672   | 457        | 1701  | 839  | 208 | 2376  | 949  |
| 211      | 3158                        | 1012       | 1758         | 1354             | 206                         | 4249   | 881        | 4169         | 2369                        | 210      | 2507   | 536        | 1879                     | 877              | 211      | 1826   | 578                      | 2136         | 934              | 206      | 1384                     | 331        | 5559         | 634              | 203       | 1188   | 341        | 1179  | 751  | 209 | 1730  | 941  |
| 209      | 8675                        | 1057       | 5829         | 1272             | 207                         | 6450   | 1042       | 5184         | 1642                        | 207      | 9410   | 881        | 8801                     | 1664             | 213      | 8691   | 892                      | 11853        | 2884             | 209      | 5571                     | 129        | 5344         | 378              | 208       | 6728   | 406        | 6808  | 777  | 209 | 8297  | 963  |
| 206      | 3939                        | 570        | 3130         | 937              | 212                         | 5276   | 1442       | 4002         | 2350                        | 207      | 6263   | 889        | 6362                     | 1750             | 207      | 3234   | 1134                     | 4240         | 5816             | 209      | 1888                     | 194        | 2165         | 453              | 208       | 1982   | 664        | 2021  | 1112 | 206 | 2486  | 843  |
| 204      | 2277                        | 787        | 1760         | 1332             | 202                         | 2712   | 865        | 1574         | 1123                        | 202      | 2171   | 596        | 2149                     | 1049             | 213      | 3192   | 1917                     | 2231         | 5886             | 206      | 760                      | 213        | 854          | 387              | 203       | 1494   | 379        | 1329  | 776  | 209 | 2884  | 921  |
| 207      | 2749                        | 855        | 2062         | 1179             | 212                         | 1868   | 836        | 1410         | 1370                        | 208      | 1869   | 417        | 1645                     | 605              | 212      | 2361   | 1080                     | 2628         | 2709             | 206      | 771                      | 204        | 802          | 457              | 208       | 1206   | 369        | 1308  | 801  | 209 | 2676  | 931  |
| 207      | 2849                        | 1150       | 1416         | 1490             | 201                         | 2159   | 651        | 1565         | 952                         | 208      | 2127   | 1114       | 1774                     | 1699             | 210      | 1923   | 501                      | 2167         | 728              | 203      | 816                      | 118        | 1061         | 292              | 209       | 1207   | 681        | 1160  | 1258 | 203 | 2170  | 623  |
| 211      | 6167                        | 1274       | 4065         | 1506             | 202                         | 5012   | 696        | 4356         | 968                         | 208      | 5434   | 907        | 4940                     | 1392             | 204      | 1954   | 382                      | 4268         | 912              | 209      | 834                      | 398        | 946          | 1206             | 198       | 1678   | 376        | 1822  | 869  | 208 | 3329  | 799  |
| 209      | 9808                        | 1381       | 6477         | 1585             | 204                         | 8071   | 1258       | 6320         | 2124                        | 207      | 9038   | 938        | 7673                     | 1268             | 208      | 11298  | 573                      | 13948        | 1272             | 210      | 6557                     | 334        | 7532         | 1197             | 209       | 9411   | 465        | 8252  | 843  | 205 | 11451 | 1283 |
| 207      | 2735                        | 1231       | 1498         | 1635             | 207                         | 2581   | 709        | 1675         | 1059                        | 211      | 2811   | 872        | 1973                     | 1126             | 210      | 2023   | 574                      | 2984         | 979              | 204      | 895                      | 430        | 1404         | 1340             | 208       | 1252   | 427        | 1553  | 845  | 208 | 4366  | 1896 |
| 205      | 2609                        | 1048       | 1915         | 1445             | 206                         | 2309   | 669        | 3156         | 1008                        | 207      | 2084   | 795        | 1650                     | 1667             | 211      | 1031   | 479                      | 1065         | 996              | 207      | 740                      | 224        | 823          | 598              | 203       | 1175   | 224        | 1271  | 519  | 209 | 5994  | 2038 |
| 203      | 3006                        | 1225       | 2092         | 1686             | 200                         | 2385   | 932        | 2711         | 1610                        | 205      | 2065   | 928        | 1554                     | 1468             | 205      | 1391   | 472                      | 1835         | 1142             | 209      | 999                      | 286        | 1426         | 597              | 209       | 1170   | 298        | 1184  | 696  | 209 | 1938  | 831  |
| 206      | 2442                        | 954        | 1689         | 1607             | 208                         | 3342   | 1160       | 4457         | 1889                        | 208      | 2053   | 763        | 1785                     | 1105             | 210      | 1135   | 536                      | 1140         | 1201             | 205      | 796                      | 280        | 944          | 614              | 209       | 1133   | 249        | 1285  | 583  | 207 | 2041  | 930  |
| 209      | 2055                        | 563        | 1637         | 1102             | 211                         | 3221   | 989        | 1797         | 1195                        | 207      | 2124   | 871        | 1685                     | 1553             | 211      | 1919   | 634                      | 1806         | 1079             | 206      | 935                      | 259        | 1654         | 511              | 204       | 1417   | 297        | 1093  | 599  | 209 | 2561  | 858  |
| 208      | 17981                       | 1242       | 12027        | 1610             | 201                         | 15250  | 680        | 14798        | 1107                        | 209      | 24004  | 2256       | 19533                    | 5285             | 207      | 21197  | 879                      | 23080        | 1840             | 205      | 8950                     | 267        | 9975         | 614              | 210       | 14416  | 589        | 13998 | 1077 | 207 | 9719  | 906  |
| 211      | 32633                       | 1208       | 22499        | 1507             | 208                         | 26350  | 1137       | 21018        | 1563                        | 209      | 36370  | 2625       | 21867                    | 5714             | 205      | 27368  | 621                      | 26661        | 1054             | 204      | 23045                    | 235        | 21990        | 505              | 210       | 26206  | 351        | 26284 | 811  | 208 | 17335 | 1088 |
| 208      | 11608                       | 1495       | 14322        | 1850             | 201                         | 11739  | 1122       | 14178        | 1445                        | 206      | 4427   | 1893       | 2451                     | 2292             | 193      | 1341   | 568                      | 1536         | 1069             | 211      | 707                      | 165        | 768          | 438              | 206       | 1287   | 473        | 1186  | 816  | 205 | 3346  | 1112 |
| 209      | 16499                       | 1154       | 17939        | 1534             | 208                         | 8152   | 833        | 9128         | 1316                        | 209      | 11015  | 1592       | 9194                     | 1592             | 203      | 2628   | 1608                     | 5744         | 6027             | 207      | 725                      | 186        | 892          | 444              | 209       | 1443   | 655        | 1676  | 1076 | 206 | 3469  | 1403 |
| 204      | 9649                        | 2094       | 9071         | 4744             | 209                         | 10133  | 734        | 10217        | 987                         | 208      | 10299  | 903        | 10097                    | 1290             | 208      | 2400   | 513                      | 3748         | 998              | 204      | 1304                     | 327        | 1506         | 774              | 207       | 1597   | 426        | 1463  | 1013 | 210 | 2828  | 1278 |
| 199      | 11321                       | 1203       | 12190        | 1472             | 208                         | 7937   | 535        | 7911         | 788                         | 214      | 2764   | 602        | 2223                     | 1007             | 208      | 1710   | 585                      | 2492         | 1119             | 205      | 1008                     | 210        | 2032         | 460              | 208       | 1487   | 855        | 1127  | 2024 | 208 | 2816  | 976  |
| 211      | 21935                       | 1411       | 18334        | 2020             | 206                         | 18579  | 825        | 15413        | 1215                        | 212      | 25284  | 917        | 20875                    | 1285             | 209      | 31218  | 1188                     | 25862        | 4003             | 210      | 19311                    | 384        | 20433        | 721              | 206       | 23140  | 547        | 23812 | 902  | 209 | 15562 | 720  |
| 208      | 26471                       | 1539       | 19548        | 1836             | 203                         | 20337  | 907        | 17431        | 1598                        | 207      | 19055  | 896        | 16775                    | 1254             | 208      | 20771  | 798                      | 22758        | 2626             | 207      | 12543                    | 248        | 12982        | 478              | 206       | 11907  | 665        | 12662 | 1042 | 205 | 9704  | 874  |
| 209      | 38157                       | 1227       | 24758        | 3670             | 206                         | 34380  | 1409       | 24708        | 2899                        | 199      | 32108  | 650        | 25611                    | 1474             | 213      | 34577  | 806                      | 25034        | 1208             | 205      | 30322                    | 336        | 24241        | 647              | 207       | 35982  | 791        | 24154 | 1047 | 207 | 25025 | 1244 |
| 210      | 19496                       | 1149       | 14507        | 1621             | 210                         | 12693  | 947        | 10204        | 1487                        | 203      | 14475  | 907        | 10881                    | 1099             | 207      | 20549  | 282                      | 23136        | 754              | 212      | 9921                     | 295        | 13075        | 599              | 212       | 11438  | 599        | 18590 | 1001 | 205 | 12726 | 956  |
| 207      | 4042                        | 1462       | 1863         | 1698             | 202                         | 5309   | 997        | 4420         | 1395                        | 205      | 2376   | 893        | 1791                     | 1311             | 211      | 2010   | 609                      | 5456         | 1343             | 213      | 924                      | 237        | 948          | 488              | 211       | 1586   | 303        | 1541  | 576  | 207 | 2280  | 1150 |
| 206      | 3227                        | 928        | 1851         | 1196             | 209                         | 4038   | 1084       | 3697         | 2458                        | 209      | 2250   | 782        | 1822                     | 1287             | 209      | 1215   | 460                      | 1352         | 965              | 212      | 700                      | 385        | 778          | 744              | 207       | 1156   | 376        | 1484  | 652  | 208 | 2687  | 854  |
| 204      | 3851                        | 880        | 3751         | 1359             | 207                         | 2602   | 947        | 2119         | 1734                        | 202      | 1944   | 852        | 1690                     | 1337             | 212      | 1453   | 1074                     | 3030         | 3205             | 211      | 691                      | 304        | 737          | 681              | 206       | 1264   | 348        | 1233  | 869  | 208 | 2439  | 922  |
| 207      | 3734                        | 1165       | 2788         | 1706             | 209                         | 2860   | 837        | 2331         | 1640                        | 211      | 2279   | 777        | 1679                     | 1073             | 207      | 2834   | 1269                     | 3785         | 2611             | 207      | 827                      | 225        | 891          | 794              | 207       | 2096   | 711        | 1558  | 1080 | 201 | 2756  | 573  |
| 202      | 2743                        | 971        | 1762         | 1321             | 207                         | 3196   | 1022       | 2300         | 1435                        | 207      | 2915   | 845        | 1731                     | 1094             | 202      | 2760   | 956                      | 2706         | 1233             | 206      | 869                      | 195        | 988          | 480              | 202       | 1036   | 466        | 1215  | 806  | 202 | 2425  | 833  |
| 210      | 4126                        | 1231       | 2172         | 1527             | 204                         | 2980   | 948        | 1890         | 1375                        | 204      | 2498   | 614        | 2237                     | 926              | 208      | 5077   | 1281                     | 5989         | 2420             | 195      | 1581                     | 264        | 1857         | 589              | 203       | 2759   | 548        | 2263  | 1265 | 204 | 2976  | 836  |
| 199      | 2529                        | 873        | 1425         | 1160             | 207                         | 2215   | 855        | 1816         | 1119                        | 204      | 2141   | 886        | 1488                     | 1569             | 205      | 1393   | 721                      | 1726         | 1749             | 208      | 737                      | 164        | 770          | 414              | 203       | 1506   | 608        | 1417  | 1184 | 206 | 1911  | 778  |
| 207      | 4249                        | 971        | 3223         | 1436             |                             |        |            |              |                             |          |        |            |                          |                  |          |        |                          |              |                  |          |                          |            |              |                  |           |        |            |       |      |     |       |      |

|     |       |      |       |      |     |       |      |       |      |     |       |      |       |      |     |       |      |       |      |     |       |     |       |      |     |       |     |       |      |     |       |      |
|-----|-------|------|-------|------|-----|-------|------|-------|------|-----|-------|------|-------|------|-----|-------|------|-------|------|-----|-------|-----|-------|------|-----|-------|-----|-------|------|-----|-------|------|
| 203 | 2932  | 955  | 1822  | 1348 | 205 | 2183  | 616  | 1524  | 910  | 208 | 2696  | 628  | 2046  | 859  | 210 | 1360  | 541  | 1776  | 1121 | 207 | 856   | 273 | 852   | 544  | 208 | 1628  | 288 | 1823  | 568  | 207 | 2112  | 701  |
| 208 | 2546  | 877  | 1251  | 1372 | 206 | 2198  | 594  | 1778  | 943  | 210 | 2371  | 765  | 2109  | 1013 | 210 | 1766  | 771  | 1496  | 1255 | 203 | 693   | 317 | 763   | 599  | 206 | 1735  | 614 | 1130  | 911  | 207 | 2089  | 854  |
| 208 | 2937  | 845  | 1607  | 1070 | 200 | 2307  | 955  | 1371  | 1578 | 204 | 1978  | 724  | 1620  | 1259 | 211 | 1140  | 616  | 1254  | 1238 | 207 | 669   | 434 | 825   | 788  | 208 | 607   | 621 | 1228  | 876  | 209 | 2434  | 839  |
| 208 | 2279  | 905  | 1509  | 1235 | 208 | 2070  | 899  | 1484  | 1267 | 202 | 2009  | 710  | 2127  | 1171 | 209 | 1072  | 905  | 1331  | 2912 | 207 | 664   | 266 | 730   | 547  | 205 | 1513  | 447 | 1307  | 696  | 208 | 2396  | 996  |
| 208 | 2273  | 805  | 1470  | 1239 | 205 | 2901  | 1027 | 1504  | 1451 | 202 | 2481  | 817  | 1649  | 1158 | 208 | 1126  | 751  | 1253  | 2719 | 210 | 882   | 290 | 629   | 732  | 204 | 1468  | 490 | 1246  | 790  | 209 | 2372  | 1061 |
| 206 | 2617  | 968  | 1600  | 1514 | 209 | 1789  | 789  | 1481  | 1179 | 210 | 2850  | 917  | 1568  | 1188 | 207 | 1209  | 572  | 1559  | 1196 | 208 | 803   | 374 | 816   | 719  | 205 | 1355  | 325 | 1396  | 501  | 209 | 2281  | 765  |
| 211 | 2467  | 1034 | 1588  | 1618 | 208 | 1349  | 524  | 1398  | 1019 | 206 | 1682  | 721  | 1597  | 1506 | 210 | 3630  | 1271 | 5488  | 4329 | 209 | 739   | 193 | 847   | 713  | 207 | 982   | 479 | 972   | 973  | 211 | 1541  | 592  |
| 204 | 3033  | 1023 | 1829  | 1126 | 207 | 2063  | 815  | 1662  | 1738 | 211 | 2205  | 602  | 2053  | 1027 | 208 | 3164  | 1229 | 5780  | 3606 | 213 | 1088  | 433 | 1196  | 1660 | 207 | 1143  | 324 | 1189  | 612  | 209 | 2070  | 600  |
| 201 | 18851 | 862  | 13514 | 1013 | 206 | 22247 | 875  | 18254 | 1732 | 207 | 21805 | 1232 | 20191 | 1775 | 212 | 19593 | 823  | 22232 | 1530 | 207 | 18462 | 354 | 20620 | 873  | 204 | 6933  | 359 | 9303  | 621  | 210 | 17532 | 558  |
| 201 | 12464 | 889  | 10667 | 1232 | 206 | 12313 | 688  | 12207 | 952  | 210 | 7652  | 1956 | 6192  | 4651 | 210 | 19364 | 816  | 22861 | 1624 | 206 | 9258  | 268 | 11965 | 547  | 206 | 10088 | 340 | 12705 | 674  | 208 | 9971  | 1021 |
| 203 | 11381 | 785  | 14325 | 1255 | 211 | 7851  | 1039 | 8505  | 2328 | 211 | 4992  | 730  | 4027  | 955  | 210 | 8773  | 1109 | 11757 | 1892 | 210 | 3764  | 448 | 5406  | 1919 | 205 | 5881  | 419 | 7575  | 786  | 202 | 5138  | 1049 |
| 208 | 6072  | 1057 | 6374  | 1694 | 210 | 3511  | 1064 | 2541  | 1610 | 204 | 5836  | 995  | 7048  | 1332 | 210 | 6098  | 578  | 10022 | 1056 | 210 | 4304  | 229 | 6179  | 515  | 210 | 1655  | 330 | 1714  | 534  | 212 | 3185  | 504  |
| 205 | 7737  | 2561 | 6606  | 4981 | 205 | 5852  | 600  | 6959  | 908  | 208 | 4340  | 608  | 3587  | 885  | 212 | 6267  | 481  | 8092  | 868  | 211 | 2655  | 225 | 3409  | 479  | 208 | 3773  | 613 | 3952  | 982  | 206 | 2881  | 584  |
| 212 | 6590  | 1619 | 5447  | 1903 | 202 | 3759  | 857  | 3157  | 1062 | 209 | 4206  | 1420 | 5229  | 2045 | 209 | 1903  | 1668 | 3166  | 3983 | 208 | 845   | 187 | 979   | 584  | 205 | 1177  | 290 | 1176  | 649  | 210 | 1996  | 887  |
| 206 | 3351  | 932  | 2140  | 1245 | 207 | 2608  | 796  | 1758  | 1121 | 209 | 3410  | 953  | 3579  | 1319 | 210 | 2275  | 1977 | 5794  | 5766 | 211 | 863   | 260 | 1032  | 545  | 202 | 1443  | 663 | 1667  | 1092 | 207 | 2108  | 835  |
| 209 | 7487  | 1278 | 5625  | 1788 | 204 | 5328  | 728  | 4903  | 1100 | 210 | 3861  | 864  | 2354  | 1172 | 208 | 9478  | 698  | 13785 | 1184 | 207 | 8607  | 178 | 12858 | 402  | 205 | 9094  | 592 | 12423 | 981  | 207 | 6071  | 676  |
| 208 | 2872  | 1006 | 2460  | 1881 | 208 | 1673  | 555  | 1700  | 950  | 209 | 2370  | 612  | 2522  | 1417 | 214 | 1255  | 1100 | 1447  | 1051 | 209 | 703   | 232 | 1038  | 536  | 210 | 1911  | 833 | 1431  | 963  | 202 | 2450  | 741  |
| 203 | 2188  | 748  | 1926  | 1632 | 209 | 2171  | 581  | 2158  | 1248 | 210 | 2302  | 545  | 2511  | 905  | 210 | 1333  | 434  | 2012  | 812  | 210 | 622   | 219 | 694   | 486  | 206 | 1112  | 210 | 1082  | 627  | 208 | 2188  | 684  |
| 209 | 2234  | 751  | 1838  | 1101 | 205 | 1523  | 441  | 1477  | 855  | 212 | 2028  | 556  | 1836  | 957  | 209 | 2752  | 491  | 4469  | 967  | 210 | 750   | 433 | 914   | 751  | 208 | 1266  | 421 | 1256  | 939  | 209 | 2708  | 959  |
| 207 | 3534  | 853  | 2558  | 1514 | 207 | 3692  | 1039 | 2217  | 1346 | 204 | 3257  | 611  | 2937  | 1182 | 209 | 3737  | 535  | 4832  | 1105 | 212 | 2295  | 222 | 2550  | 507  | 204 | 1799  | 323 | 1745  | 490  | 209 | 3055  | 755  |
| 196 | 3412  | 2206 | 1259  | 4407 | 198 | 2442  | 663  | 1879  | 1059 | 204 | 2265  | 897  | 1465  | 1448 | 202 | 1640  | 500  | 3095  | 991  | 211 | 702   | 287 | 808   | 519  | 207 | 1326  | 249 | 1407  | 445  | 210 | 2843  | 907  |
| 199 | 2380  | 1107 | 1435  | 1192 | 207 | 2948  | 818  | 1716  | 932  | 197 | 2839  | 784  | 2557  | 1007 | 205 | 2567  | 968  | 3116  | 2260 | 203 | 763   | 229 | 843   | 586  | 206 | 1389  | 537 | 1337  | 964  | 208 | 2356  | 754  |
| 207 | 1913  | 817  | 1660  | 1311 | 206 | 1983  | 665  | 1328  | 1017 | 209 | 2772  | 898  | 1770  | 1143 | 194 | 1865  | 495  | 3218  | 883  | 208 | 689   | 209 | 695   | 498  | 206 | 1792  | 716 | 1413  | 1111 | 205 | 2041  | 681  |
| 212 | 2741  | 1048 | 1644  | 1775 | 207 | 2004  | 747  | 1106  | 1169 | 208 | 2870  | 747  | 1106  | 1169 | 202 | 2051  | 445  | 2980  | 999  | 209 | 763   | 238 | 838   | 456  | 205 | 1768  | 620 | 1521  | 925  | 202 | 2401  | 901  |
| 207 | 1981  | 743  | 1302  | 1037 | 210 | 1932  | 684  | 1509  | 1014 | 205 | 2483  | 1023 | 1944  | 1714 | 210 | 1679  | 488  | 4062  | 1082 | 206 | 1164  | 301 | 2733  | 637  | 207 | 1489  | 499 | 1453  | 1119 | 208 | 2665  | 991  |
| 208 | 2389  | 901  | 1661  | 1177 | 206 | 1755  | 691  | 1342  | 1158 | 210 | 2449  | 926  | 2125  | 1434 | 204 | 2195  | 1153 | 5072  | 1453 | 210 | 702   | 136 | 692   | 333  | 208 | 1389  | 735 | 1110  | 1319 | 206 | 1659  | 610  |
| 210 | 2404  | 930  | 1294  | 1068 | 207 | 1668  | 592  | 1401  | 1242 | 210 | 3082  | 1298 | 1626  | 1807 | 203 | 2104  | 1107 | 5003  | 2467 | 210 | 662   | 194 | 674   | 394  | 208 | 1568  | 535 | 1208  | 1043 | 206 | 2526  | 1003 |
| 207 | 2766  | 962  | 1481  | 1143 | 207 | 2353  | 967  | 1640  | 1497 | 207 | 2838  | 1062 | 1762  | 1410 | 208 | 2105  | 720  | 4444  | 1568 | 208 | 715   | 218 | 743   | 505  | 208 | 1668  | 600 | 1286  | 997  | 205 | 2340  | 1022 |
| 203 | 2564  | 881  | 1879  | 1195 | 202 | 1808  | 891  | 1136  | 1347 | 209 | 2464  | 1093 | 1518  | 1542 | 206 | 1438  | 444  | 1800  | 768  | 212 | 865   | 558 | 1035  | 1161 | 211 | 1325  | 320 | 1433  | 632  | 209 | 2246  | 797  |
| 208 | 1817  | 810  | 1196  | 1203 | 211 | 1954  | 919  | 1207  | 1504 | 207 | 3227  | 932  | 2884  | 1144 | 210 | 2103  | 467  | 4852  | 944  | 209 | 752   | 491 | 1073  | 946  | 207 | 1398  | 491 | 1234  | 822  | 212 | 2242  | 772  |
| 211 | 5942  | 1218 | 4439  | 1741 | 207 | 4629  | 831  | 3700  | 1275 | 207 | 3184  | 726  | 2703  | 1160 | 205 | 7461  | 932  | 7958  | 2845 | 210 | 3896  | 258 | 4571  | 455  | 200 | 3865  | 433 | 5267  | 856  | 210 | 3787  | 584  |
| 210 | 4105  | 1279 | 2657  | 1816 | 200 | 2943  | 1087 | 1627  | 1380 | 200 | 2161  | 801  | 2044  | 1608 | 211 | 1316  | 534  | 1967  | 1151 | 209 | 943   | 277 | 1328  | 706  | 205 | 1503  | 473 | 1462  | 746  | 209 | 1871  | 532  |
| 208 | 4111  | 852  | 3674  | 1188 | 209 | 2354  | 805  | 1889  | 1136 | 210 | 4066  | 1254 | 2721  | 2076 | 208 | 1917  | 512  | 3551  | 938  | 209 | 836   | 310 | 991   | 856  | 209 | 1310  | 523 | 1372  | 991  | 209 | 2010  | 604  |
| 188 | 8056  | 1389 | 8506  | 2071 | 208 | 6198  | 1113 | 5561  | 1394 | 204 | 4298  | 2124 | 3078  | 4509 | 207 | 7292  | 381  | 10224 | 795  | 211 | 3935  | 194 | 4712  | 457  | 202 | 2683  | 445 | 3066  | 920  | 207 | 3294  | 628  |
| 208 | 3610  | 1223 | 2076  | 1456 | 203 | 5393  | 740  | 6907  | 1136 | 208 | 4955  | 1373 | 3387  | 2474 | 205 | 1790  | 383  | 4444  | 1050 | 210 | 1347  | 221 | 7241  | 480  | 205 | 1737  | 427 | 1428  | 864  | 207 | 1790  | 685  |
| 206 | 4126  | 869  | 5675  | 1396 | 212 | 2075  | 780  | 1759  | 1251 | 212 | 3077  | 902  | 2296  | 1276 | 211 | 1879  | 439  | 3459  | 807  | 206 | 939   | 360 | 1137  | 716  | 205 | 1228  | 248 | 1400  | 695  | 209 | 1858  | 513  |
| 203 | 19732 | 3665 | 16529 | 6246 | 204 | 13008 | 1075 | 12110 | 2905 | 210 | 14877 | 660  | 15298 | 1074 | 211 | 20628 | 321  | 21695 | 608  | 208 | 15432 | 244 | 18317 | 504  | 204 | 1693  | 340 | 18127 | 617  | 209 | 13568 | 804  |
| 208 | 7032  | 1181 | 6783  | 1704 | 208 | 12130 | 1983 | 13018 | 3423 | 203 | 3251  | 1008 | 2286  | 1425 | 210 | 3644  | 404  | 5375  | 870  | 208 | 1633  | 326 | 1793  | 974  | 204 | 2264  | 343 | 2218  | 618  | 213 | 2832  | 590  |
| 206 | 4583  | 533  | 4252  | 876  | 206 | 6865  | 1001 | 7413  | 1308 | 205 | 3066  | 863  | 2418  | 1342 | 213 | 2845  | 969  | 2972  | 4115 | 205 | 1714  | 339 | 2118  | 932  | 207 | 2096  | 214 | 2051  | 376  | 210 | 2437  | 668  |
| 211 | 10144 | 1099 | 7552  | 1715 | 207 | 6661  | 617  | 6288  | 955  | 208 | 7891  | 1097 | 6317  | 1463 | 206 | 10009 | 1081 | 13815 | 4020 | 210 | 6691  | 214 | 9312  | 556  | 208 | 8564  | 421 | 11268 | 781  | 208 | 9066  | 650  |
| 209 | 3563  | 701  | 3512  | 963  | 207 | 2511  | 918  | 1803  | 1299 | 206 | 1931  | 595  | 1738  | 924  | 213 | 1796  | 1319 | 2086  | 4222 | 208 | 669   | 184 | 784   | 429  | 204 | 1367  | 459 | 1183  | 960  | 203 | 2159  | 781  |
| 212 | 8346  | 587  | 7964  | 951  | 209 | 5955  | 848  | 4700  | 1217 | 202 | 5356  | 551  | 5143  | 906  | 209 | 15590 | 403  | 20118 | 663  | 209 | 12312 | 361 | 15593 | 675  | 200 | 10581 | 620 | 12566 | 1071 | 209 | 11159 | 937  |
| 204 | 2340  | 645  | 1722  | 1154 | 207 | 1732  | 426  | 1644  | 841  | 212 | 2320  | 735  | 2138  | 1170 | 210 | 2144  | 558  | 3421  | 989  | 210 | 1143  | 313 | 1331  | 697  | 204 | 3547  | 474 | 9188  | 1033 | 211 | 2335  | 1200 |
| 198 |       |      |       |      |     |       |      |       |      |     |       |      |       |      |     |       |      |       |      |     |       |     |       |      |     |       |     |       |      |     |       |      |

|     |       |      |       |      |     |       |      |       |      |     |       |      |       |      |     |       |      |       |      |     |       |     |       |      |     |       |     |       |      |     |       |      |
|-----|-------|------|-------|------|-----|-------|------|-------|------|-----|-------|------|-------|------|-----|-------|------|-------|------|-----|-------|-----|-------|------|-----|-------|-----|-------|------|-----|-------|------|
| 203 | 2877  | 1134 | 1150  | 1367 | 202 | 2803  | 1063 | 1595  | 1322 | 199 | 2274  | 755  | 2021  | 1037 | 211 | 1788  | 665  | 2437  | 1612 | 210 | 1063  | 256 | 4274  | 450  | 208 | 1277  | 518 | 1141  | 1443 | 205 | 2090  | 819  |
| 204 | 2184  | 804  | 1389  | 1104 | 206 | 3050  | 1328 | 1982  | 1663 | 198 | 1479  | 399  | 1483  | 673  | 212 | 1307  | 840  | 1747  | 1822 | 207 | 654   | 192 | 642   | 420  | 207 | 1445  | 498 | 1351  | 742  | 208 | 2055  | 928  |
| 202 | 2815  | 979  | 1964  | 1274 | 206 | 2723  | 1141 | 1540  | 1292 | 206 | 2344  | 924  | 2414  | 1539 | 207 | 3447  | 1071 | 6421  | 1787 | 200 | 794   | 370 | 884   | 722  | 207 | 1782  | 633 | 1432  | 842  | 207 | 2776  | 970  |
| 212 | 9650  | 856  | 6759  | 1124 | 209 | 11409 | 997  | 10029 | 1357 | 206 | 11642 | 777  | 8976  | 960  | 212 | 10891 | 573  | 12331 | 1008 | 207 | 3267  | 304 | 4163  | 814  | 210 | 1573  | 706 | 7943  | 1297 | 206 | 7178  | 1054 |
| 211 | 16887 | 1347 | 19149 | 4709 | 204 | 2888  | 992  | 1308  | 1280 | 199 | 11668 | 1308 | 11137 | 1878 | 204 | 2029  | 356  | 2056  | 685  | 198 | 838   | 368 | 890   | 812  | 206 | 1520  | 487 | 1233  | 863  | 208 | 2685  | 932  |
| 208 | 26279 | 2454 | 18466 | 4274 | 206 | 24987 | 1091 | 19541 | 1518 | 208 | 28314 | 1204 | 22086 | 1897 | 212 | 22218 | 742  | 23156 | 1234 | 208 | 15662 | 470 | 19504 | 706  | 202 | 25480 | 390 | 24991 | 698  | 208 | 20214 | 1339 |
| 202 | 30720 | 1412 | 20189 | 1619 | 208 | 33575 | 2766 | 21090 | 6588 | 206 | 31825 | 925  | 21835 | 1177 | 205 | 42889 | 659  | 24402 | 1261 | 209 | 27990 | 314 | 23669 | 756  | 209 | 30491 | 717 | 24395 | 1077 | 208 | 20581 | 993  |
| 208 | 10933 | 1068 | 9074  | 1419 | 208 | 12689 | 1754 | 11431 | 4724 | 207 | 16083 | 1639 | 15986 | 4441 | 210 | 11863 | 806  | 13750 | 1429 | 208 | 5358  | 294 | 5479  | 585  | 211 | 6518  | 659 | 6931  | 1130 | 212 | 6111  | 1179 |
| 207 | 13279 | 1393 | 11221 | 1908 | 205 | 9553  | 741  | 8376  | 1197 | 208 | 14260 | 1205 | 11795 | 1628 | 210 | 8078  | 527  | 11293 | 899  | 212 | 8180  | 237 | 9609  | 522  | 207 | 6917  | 626 | 9060  | 1145 | 207 | 5568  | 815  |
| 211 | 10355 | 1158 | 8134  | 1569 | 202 | 4218  | 765  | 3890  | 1021 | 211 | 14458 | 1089 | 12999 | 1328 | 208 | 12417 | 469  | 14441 | 895  | 210 | 3957  | 518 | 3831  | 1314 | 203 | 7840  | 600 | 8399  | 1105 | 210 | 6958  | 772  |
| 211 | 3215  | 962  | 2157  | 1415 | 211 | 2965  | 801  | 2040  | 1260 | 205 | 3060  | 904  | 2209  | 1524 | 211 | 2674  | 415  | 4917  | 665  | 211 | 1452  | 275 | 3841  | 609  | 207 | 1624  | 681 | 1247  | 1246 | 203 | 2875  | 946  |
| 197 | 10508 | 567  | 11243 | 1029 | 213 | 2516  | 881  | 1851  | 1171 | 209 | 2742  | 863  | 1756  | 1285 | 208 | 2814  | 342  | 5339  | 693  | 210 | 1038  | 310 | 1082  | 611  | 208 | 2009  | 576 | 1519  | 815  | 206 | 2777  | 1083 |
| 204 | 12369 | 2801 | 14132 | 8575 | 207 | 3695  | 1274 | 2107  | 1609 | 206 | 6422  | 821  | 5957  | 1656 | 211 | 2304  | 587  | 5956  | 949  | 211 | 780   | 361 | 783   | 739  | 206 | 1720  | 685 | 1316  | 1052 | 210 | 2459  | 953  |
| 211 | 3542  | 740  | 2182  | 1093 | 207 | 3898  | 839  | 2958  | 1159 | 210 | 2761  | 633  | 2277  | 1016 | 212 | 2330  | 684  | 2349  | 1254 | 209 | 1750  | 564 | 1262  | 777  | 201 | 1614  | 413 | 1660  | 742  | 211 | 3285  | 1031 |
| 210 | 3722  | 1063 | 2290  | 1500 | 207 | 3103  | 739  | 2365  | 1160 | 205 | 2354  | 831  | 2115  | 1023 | 208 | 1879  | 574  | 3219  | 1071 | 210 | 749   | 291 | 1088  | 589  | 208 | 1836  | 437 | 1288  | 597  | 201 | 2209  | 1038 |
| 210 | 6834  | 1171 | 4127  | 1369 | 209 | 5052  | 635  | 4395  | 1368 | 212 | 8549  | 803  | 8606  | 1127 | 211 | 11160 | 733  | 14044 | 1371 | 202 | 5057  | 271 | 4958  | 454  | 202 | 8292  | 556 | 8233  | 750  | 199 | 6793  | 740  |
| 209 | 4371  | 958  | 3344  | 1651 | 205 | 3514  | 975  | 2647  | 1385 | 208 | 3603  | 975  | 2951  | 1377 | 210 | 3850  | 975  | 4923  | 1640 | 207 | 1797  | 240 | 1948  | 532  | 206 | 2020  | 850 | 1935  | 1024 | 203 | 2560  | 804  |
| 207 | 1685  | 663  | 1534  | 1255 | 213 | 2069  | 512  | 1659  | 968  | 208 | 4355  | 811  | 3478  | 1110 | 208 | 2299  | 740  | 5640  | 1478 | 208 | 717   | 232 | 885   | 503  | 203 | 2132  | 725 | 1597  | 1169 | 203 | 2889  | 934  |
| 208 | 2388  | 626  | 1558  | 892  | 207 | 1512  | 645  | 1271  | 756  | 206 | 2132  | 758  | 2062  | 1284 | 208 | 2181  | 644  | 4996  | 1508 | 210 | 773   | 242 | 803   | 521  | 205 | 1326  | 519 | 1251  | 869  | 210 | 2887  | 1045 |
| 208 | 2094  | 917  | 1685  | 1555 | 210 | 2130  | 691  | 1368  | 1199 | 204 | 2987  | 750  | 1495  | 768  | 201 | 1189  | 749  | 1542  | 1746 | 206 | 789   | 382 | 856   | 799  | 209 | 1562  | 668 | 1624  | 1145 | 206 | 2102  | 741  |
| 208 | 4190  | 912  | 2891  | 1088 | 204 | 1743  | 454  | 1678  | 804  | 211 | 2648  | 744  | 1977  | 1125 | 210 | 1237  | 336  | 1386  | 720  | 207 | 789   | 443 | 863   | 1156 | 207 | 1784  | 503 | 1781  | 905  | 209 | 2669  | 890  |
| 212 | 8332  | 952  | 6117  | 1186 | 208 | 6422  | 787  | 4732  | 1133 | 207 | 14304 | 953  | 10283 | 1152 | 205 | 13063 | 481  | 15393 | 755  | 207 | 7075  | 417 | 8148  | 777  | 206 | 8650  | 302 | 9217  | 572  | 206 | 13983 | 1141 |
| 208 | 2161  | 1043 | 1380  | 1646 | 207 | 3093  | 943  | 1976  | 1116 | 204 | 2809  | 839  | 1633  | 1126 | 208 | 1848  | 322  | 4726  | 864  | 207 | 658   | 215 | 856   | 467  | 204 | 1229  | 428 | 1011  | 895  | 208 | 1969  | 660  |
| 207 | 2800  | 1058 | 1594  | 1340 | 209 | 3035  | 667  | 2650  | 1006 | 207 | 2269  | 728  | 1654  | 933  | 209 | 1187  | 381  | 2234  | 757  | 207 | 1044  | 276 | 1820  | 633  | 205 | 1278  | 315 | 1354  | 561  | 209 | 2455  | 767  |
| 209 | 2295  | 891  | 1523  | 1251 | 205 | 3130  | 1021 | 2547  | 1713 | 211 | 1694  | 601  | 1588  | 1015 | 212 | 1052  | 487  | 1255  | 949  | 210 | 648   | 182 | 838   | 515  | 208 | 1249  | 490 | 1314  | 895  | 210 | 2032  | 906  |
| 206 | 1761  | 689  | 1437  | 1172 | 212 | 2906  | 839  | 2410  | 1341 | 208 | 2689  | 997  | 1888  | 1600 | 202 | 950   | 393  | 1194  | 778  | 211 | 716   | 172 | 880   | 419  | 208 | 1415  | 484 | 1410  | 760  | 208 | 1986  | 1170 |
| 206 | 2021  | 784  | 1668  | 1175 | 213 | 2605  | 569  | 2085  | 922  | 209 | 3037  | 906  | 4404  | 1425 | 209 | 1569  | 355  | 3328  | 728  | 208 | 736   | 293 | 696   | 576  | 210 | 1310  | 442 | 1223  | 639  | 210 | 2406  | 854  |
| 212 | 10715 | 635  | 9023  | 1532 | 211 | 15651 | 803  | 14711 | 1255 | 209 | 13029 | 895  | 9951  | 1235 | 209 | 17153 | 483  | 20751 | 858  | 208 | 10937 | 350 | 11167 | 683  | 210 | 14361 | 558 | 12770 | 988  | 208 | 9985  | 1059 |
| 208 | 29248 | 1031 | 23824 | 2387 | 212 | 23138 | 609  | 21460 | 919  | 211 | 32542 | 1095 | 23409 | 1459 | 211 | 25335 | 333  | 26413 | 674  | 209 | 22215 | 219 | 22180 | 443  | 209 | 32846 | 490 | 25810 | 841  | 208 | 19662 | 830  |
| 206 | 14924 | 2796 | 17209 | 5129 | 205 | 13857 | 902  | 17230 | 1073 | 207 | 15328 | 999  | 16204 | 1115 | 205 | 3200  | 808  | 4979  | 1355 | 203 | 845   | 388 | 867   | 615  | 209 | 1272  | 673 | 1026  | 1229 | 207 | 3476  | 1215 |
| 213 | 12979 | 3268 | 15412 | 6748 | 200 | 10660 | 2063 | 11783 | 5777 | 205 | 11899 | 1537 | 11184 | 2112 | 207 | 2653  | 641  | 5264  | 1061 | 207 | 801   | 372 | 832   | 812  | 212 | 1912  | 785 | 1431  | 1575 | 204 | 2395  | 964  |
| 205 | 5515  | 1599 | 3399  | 1996 | 205 | 3221  | 1107 | 1961  | 1359 | 204 | 3962  | 2811 | 2008  | 5621 | 207 | 2417  | 762  | 2731  | 1650 | 204 | 1043  | 401 | 1193  | 877  | 209 | 1626  | 449 | 1752  | 835  | 208 | 2337  | 654  |
| 206 | 3850  | 1122 | 2704  | 1262 | 206 | 2437  | 858  | 1627  | 1294 | 207 | 3045  | 1172 | 2130  | 2181 | 207 | 2338  | 581  | 5203  | 1203 | 207 | 1025  | 392 | 1061  | 654  | 206 | 1652  | 738 | 1298  | 1402 | 206 | 3460  | 1228 |
| 210 | 21302 | 847  | 17706 | 1133 | 205 | 16578 | 689  | 16189 | 1227 | 210 | 25387 | 757  | 21487 | 1096 | 209 | 21058 | 942  | 23706 | 3070 | 210 | 17305 | 431 | 19602 | 692  | 209 | 23359 | 472 | 23919 | 832  | 209 | 14299 | 1087 |
| 206 | 23680 | 794  | 20354 | 1084 | 212 | 17829 | 618  | 15031 | 935  | 213 | 17220 | 1088 | 14691 | 2483 | 211 | 19594 | 446  | 23064 | 709  | 210 | 12261 | 206 | 13076 | 567  | 206 | 13090 | 491 | 16329 | 992  | 211 | 10929 | 1021 |
| 207 | 33327 | 745  | 25180 | 1189 | 213 | 35246 | 895  | 25699 | 1272 | 206 | 32116 | 858  | 23286 | 1181 | 209 | 30480 | 546  | 26293 | 872  | 212 | 28549 | 353 | 24515 | 525  | 207 | 30831 | 268 | 25838 | 681  | 210 | 22950 | 856  |
| 197 | 25699 | 2969 | 18771 | 7281 | 200 | 14286 | 993  | 11306 | 1417 | 207 | 21331 | 1677 | 13653 | 4584 | 208 | 19093 | 550  | 22893 | 872  | 211 | 10105 | 369 | 12145 | 736  | 206 | 18693 | 369 | 22747 | 642  | 206 | 13577 | 975  |
| 209 | 3780  | 1050 | 2569  | 1425 | 208 | 3788  | 1012 | 2890  | 1447 | 209 | 2635  | 670  | 2153  | 909  | 209 | 1862  | 1046 | 2398  | 2899 | 205 | 1112  | 351 | 1048  | 629  | 209 | 1598  | 434 | 1545  | 883  | 209 | 2102  | 931  |
| 211 | 2734  | 1024 | 2316  | 1568 | 211 | 2308  | 998  | 1722  | 1354 | 206 | 2620  | 899  | 2002  | 1228 | 208 | 1009  | 331  | 1332  | 617  | 211 | 743   | 361 | 820   | 653  | 207 | 1810  | 604 | 1424  | 949  | 206 | 2140  | 962  |
| 206 | 2930  | 1065 | 2335  | 1350 | 207 | 3089  | 578  | 2530  | 1175 | 207 | 1823  | 600  | 1459  | 973  | 208 | 1327  | 611  | 1426  | 1396 | 208 | 806   | 299 | 905   | 515  | 205 | 1294  | 673 | 1140  | 1456 | 207 | 2232  | 877  |
| 201 | 3223  | 956  | 1825  | 1309 | 205 | 3008  | 678  | 2677  | 1244 | 207 | 3797  | 696  | 3248  | 1093 | 209 | 2110  | 378  | 5366  | 801  | 212 | 665   | 173 | 750   | 327  | 205 | 1760  | 675 | 1417  | 1615 | 202 | 2560  | 832  |
| 210 | 2749  | 706  | 1583  | 845  | 204 | 2289  | 891  | 1684  | 1524 | 204 | 3692  | 612  | 3818  | 972  | 209 | 1371  | 497  | 3332  | 952  | 210 | 750   | 298 | 771   | 748  | 206 | 1365  | 397 | 1387  | 718  | 210 | 2498  | 837  |
| 208 | 3265  | 794  | 2316  | 1132 | 210 | 2807  | 911  | 1558  | 1018 | 192 | 2628  | 981  | 2260  | 1743 | 207 | 3373  | 894  | 5622  | 2704 | 210 |       |     |       |      |     |       |     |       |      |     |       |      |

|     |       |      |       |      |     |       |      |       |      |     |       |      |       |      |     |       |      |       |      |     |       |     |       |      |     |       |      |       |      |     |       |      |
|-----|-------|------|-------|------|-----|-------|------|-------|------|-----|-------|------|-------|------|-----|-------|------|-------|------|-----|-------|-----|-------|------|-----|-------|------|-------|------|-----|-------|------|
| 208 | 5867  | 831  | 9222  | 1422 | 211 | 2192  | 662  | 1746  | 946  | 200 | 2370  | 817  | 1527  | 1265 | 205 | 2431  | 404  | 5997  | 742  | 207 | 550   | 431 | 636   | 1845 | 208 | 1303  | 479  | 1209  | 832  | 207 | 2643  | 1091 |
| 205 | 9409  | 1241 | 11114 | 1479 | 199 | 2371  | 836  | 2002  | 1322 | 208 | 2763  | 540  | 3762  | 874  | 208 | 1699  | 1248 | 2110  | 4315 | 212 | 1115  | 286 | 1250  | 536  | 208 | 1188  | 439  | 1042  | 687  | 209 | 2644  | 539  |
| 205 | 24299 | 975  | 17459 | 1645 | 204 | 24435 | 1166 | 18878 | 2963 | 205 | 24053 | 909  | 19458 | 1876 | 207 | 12677 | 545  | 16064 | 1159 | 210 | 19713 | 233 | 20878 | 539  | 209 | 12916 | 356  | 8339  | 926  | 210 | 16977 | 611  |
| 210 | 15839 | 969  | 11546 | 1415 | 209 | 11779 | 594  | 10240 | 1077 | 207 | 14873 | 1201 | 15025 | 2304 | 210 | 14800 | 165  | 18845 | 451  | 209 | 8811  | 295 | 11239 | 581  | 206 | 62961 | 544  | 12319 | 1009 | 209 | 6993  | 511  |
| 214 | 8701  | 802  | 6989  | 993  | 204 | 11378 | 742  | 11142 | 1277 | 210 | 14540 | 1155 | 13177 | 1844 | 209 | 5434  | 675  | 8767  | 1262 | 207 | 3612  | 165 | 4978  | 365  | 205 | 4402  | 551  | 5651  | 887  | 210 | 4317  | 1060 |
| 210 | 8373  | 2695 | 7670  | 6690 | 210 | 3948  | 732  | 2779  | 922  | 203 | 4209  | 835  | 3197  | 1113 | 207 | 5043  | 395  | 9502  | 800  | 213 | 3789  | 394 | 4733  | 735  | 209 | 1392  | 423  | 1345  | 867  | 207 | 3792  | 1004 |
| 210 | 7583  | 1016 | 7593  | 1590 | 208 | 4714  | 1023 | 4346  | 1592 | 203 | 7275  | 1018 | 7830  | 2331 | 209 | 5854  | 664  | 7316  | 915  | 206 | 2530  | 243 | 2645  | 619  | 206 | 3091  | 439  | 3162  | 605  | 210 | 2993  | 859  |
| 209 | 2973  | 792  | 3007  | 1503 | 208 | 4246  | 810  | 6792  | 1301 | 208 | 2330  | 522  | 2173  | 746  | 212 | 2798  | 661  | 4454  | 945  | 205 | 689   | 293 | 790   | 675  | 205 | 1738  | 600  | 1243  | 817  | 202 | 2506  | 1080 |
| 210 | 3370  | 940  | 2830  | 1462 | 205 | 2830  | 810  | 2173  | 1246 | 210 | 3139  | 526  | 2470  | 881  | 210 | 2282  | 745  | 3171  | 1399 | 204 | 718   | 308 | 983   | 583  | 207 | 1740  | 474  | 1491  | 751  | 203 | 1684  | 784  |
| 208 | 6565  | 1006 | 5908  | 1407 | 210 | 7811  | 883  | 7421  | 1110 | 209 | 6965  | 991  | 6547  | 1651 | 209 | 6291  | 494  | 10953 | 880  | 210 | 7735  | 160 | 11375 | 330  | 212 | 7164  | 577  | 10932 | 1146 | 210 | 6889  | 1080 |
| 205 | 4394  | 1086 | 3258  | 1487 | 205 | 3849  | 757  | 4220  | 1154 | 210 | 3242  | 830  | 3133  | 1582 | 211 | 1871  | 469  | 3259  | 831  | 207 | 835   | 329 | 1161  | 659  | 208 | 2104  | 768  | 1662  | 1164 | 196 | 2010  | 965  |
| 200 | 2491  | 731  | 2609  | 1088 | 207 | 1864  | 543  | 1650  | 1050 | 210 | 2733  | 967  | 3173  | 1203 | 207 | 2054  | 1316 | 2403  | 3930 | 205 | 920   | 325 | 1755  | 568  | 206 | 2258  | 1040 | 1206  | 1656 | 194 | 2082  | 726  |
| 206 | 2960  | 627  | 2580  | 908  | 209 | 2316  | 670  | 1992  | 1084 | 206 | 2481  | 698  | 2210  | 1337 | 209 | 1687  | 577  | 3028  | 1189 | 212 | 880   | 346 | 949   | 655  | 205 | 1858  | 674  | 1464  | 1184 | 208 | 1740  | 710  |
| 211 | 4589  | 926  | 3492  | 1171 | 205 | 3391  | 877  | 2519  | 1168 | 207 | 3383  | 818  | 3402  | 1426 | 209 | 3429  | 280  | 5969  | 500  | 209 | 2493  | 420 | 2724  | 821  | 206 | 2001  | 215  | 2188  | 386  | 211 | 3349  | 824  |
| 207 | 2329  | 735  | 1559  | 1161 | 205 | 2169  | 727  | 2201  | 1266 | 210 | 1976  | 716  | 1764  | 1041 | 211 | 1336  | 356  | 2321  | 688  | 209 | 792   | 285 | 1276  | 490  | 208 | 1310  | 341  | 1323  | 613  | 206 | 2867  | 1072 |
| 210 | 2662  | 1004 | 1713  | 1378 | 207 | 2120  | 758  | 1549  | 1109 | 204 | 2687  | 1177 | 1744  | 1458 | 200 | 1527  | 861  | 1658  | 1765 | 209 | 1170  | 514 | 1078  | 827  | 204 | 1899  | 480  | 1485  | 738  | 205 | 1601  | 409  |
| 204 | 2052  | 863  | 1428  | 1183 | 208 | 1778  | 830  | 1550  | 1398 | 211 | 2210  | 630  | 1597  | 938  | 208 | 1790  | 741  | 3190  | 1287 | 204 | 778   | 391 | 884   | 729  | 209 | 1728  | 304  | 1786  | 617  | 210 | 2012  | 497  |
| 198 | 2255  | 781  | 1764  | 1080 | 208 | 2130  | 688  | 1453  | 1109 | 206 | 2680  | 1024 | 2045  | 1317 | 208 | 2964  | 628  | 5879  | 883  | 200 | 881   | 393 | 969   | 717  | 208 | 1083  | 382  | 1076  | 717  | 210 | 1190  | 682  |
| 202 | 2677  | 1065 | 1143  | 1423 | 197 | 2009  | 819  | 1270  | 1209 | 207 | 2374  | 723  | 1648  | 923  | 203 | 1513  | 491  | 2527  | 1219 | 208 | 1231  | 400 | 2060  | 819  | 210 | 5548  | 492  | 843   | 841  | 209 | 1866  | 613  |
| 196 | 2538  | 1045 | 1340  | 1488 | 208 | 2085  | 826  | 1577  | 1348 | 209 | 2901  | 1338 | 1855  | 2220 | 209 | 2165  | 386  | 5357  | 721  | 212 | 753   | 413 | 793   | 710  | 211 | 1767  | 595  | 1459  | 856  | 202 | 1880  | 668  |
| 211 | 3419  | 1056 | 1572  | 1251 | 195 | 2464  | 1011 | 1797  | 1451 | 201 | 1683  | 820  | 1557  | 1151 | 211 | 2133  | 592  | 4503  | 1021 | 210 | 1001  | 464 | 822   | 668  | 203 | 1594  | 654  | 1165  | 929  | 204 | 1920  | 942  |
| 209 | 2103  | 729  | 1673  | 1293 | 205 | 1319  | 513  | 1388  | 973  | 209 | 3240  | 956  | 5094  | 1237 | 203 | 1620  | 411  | 2899  | 705  | 210 | 1238  | 316 | 956   | 498  | 206 | 1238  | 484  | 1232  | 885  | 211 | 2693  | 1054 |
| 209 | 2419  | 967  | 1748  | 1443 | 208 | 1689  | 469  | 1457  | 783  | 209 | 2247  | 846  | 1959  | 1441 | 211 | 1449  | 573  | 3035  | 960  | 209 | 810   | 369 | 822   | 685  | 207 | 1378  | 624  | 1337  | 1093 | 208 | 3042  | 997  |
| 209 | 4918  | 1003 | 9763  | 1239 | 201 | 1496  | 570  | 1362  | 885  | 211 | 2556  | 940  | 1939  | 1371 | 207 | 3441  | 743  | 7398  | 1206 | 205 | 873   | 566 | 896   | 1695 | 205 | 1667  | 604  | 1422  | 959  | 210 | 2230  | 831  |
| 208 | 8606  | 1559 | 8416  | 3077 | 210 | 3164  | 517  | 2845  | 876  | 211 | 4509  | 972  | 3143  | 1273 | 207 | 8016  | 556  | 8623  | 1207 | 210 | 3801  | 196 | 4924  | 445  | 208 | 3703  | 600  | 4538  | 909  | 209 | 4663  | 791  |
| 207 | 4116  | 1417 | 3554  | 2212 | 209 | 1847  | 322  | 1794  | 517  | 209 | 2585  | 887  | 1893  | 1460 | 205 | 1337  | 504  | 1460  | 1095 | 209 | 952   | 398 | 1105  | 769  | 207 | 1960  | 672  | 1329  | 1034 | 198 | 1599  | 364  |
| 209 | 2345  | 537  | 2306  | 881  | 211 | 1857  | 486  | 1782  | 838  | 210 | 3023  | 787  | 2121  | 1075 | 210 | 1780  | 662  | 2038  | 1503 | 212 | 743   | 272 | 946   | 677  | 201 | 1395  | 451  | 1360  | 956  | 209 | 1729  | 600  |
| 207 | 5595  | 510  | 2269  | 739  | 209 | 3182  | 610  | 2841  | 1126 | 204 | 3963  | 888  | 3207  | 1426 | 208 | 7240  | 600  | 9598  | 952  | 207 | 3523  | 148 | 4317  | 349  | 207 | 3348  | 402  | 4383  | 750  | 209 | 3839  | 1044 |
| 204 | 4142  | 1036 | 3681  | 1528 | 209 | 1652  | 629  | 1552  | 1163 | 211 | 3446  | 1229 | 1791  | 1450 | 205 | 1357  | 491  | 2690  | 911  | 210 | 728   | 169 | 873   | 471  | 200 | 1105  | 307  | 1141  | 717  | 211 | 2280  | 968  |
| 210 | 5501  | 1818 | 4479  | 3883 | 205 | 2284  | 712  | 2207  | 1027 | 207 | 3811  | 1121 | 2087  | 1212 | 208 | 1779  | 287  | 3586  | 824  | 209 | 775   | 295 | 909   | 631  | 206 | 1754  | 527  | 1456  | 945  | 208 | 1531  | 666  |
| 206 | 14445 | 780  | 13495 | 1470 | 207 | 12118 | 975  | 11845 | 2942 | 209 | 20204 | 938  | 18841 | 1425 | 208 | 19786 | 728  | 20527 | 1306 | 207 | 11946 | 309 | 15470 | 656  | 212 | 19302 | 554  | 22615 | 813  | 208 | 10671 | 971  |
| 202 | 3554  | 950  | 2863  | 1356 | 207 | 5002  | 815  | 5317  | 1432 | 209 | 2990  | 702  | 2680  | 1044 | 207 | 4235  | 677  | 5055  | 1113 | 196 | 1798  | 269 | 2407  | 596  | 206 | 2292  | 454  | 2632  | 720  | 206 | 2190  | 840  |
| 197 | 4023  | 909  | 3000  | 1274 | 206 | 3527  | 888  | 3098  | 1237 | 208 | 3904  | 693  | 4266  | 1193 | 209 | 2068  | 670  | 2366  | 1409 | 210 | 1386  | 223 | 1782  | 426  | 207 | 3642  | 654  | 3369  | 1000 | 201 | 2950  | 793  |
| 203 | 8899  | 1134 | 5907  | 1143 | 200 | 4848  | 585  | 4516  | 906  | 209 | 7067  | 971  | 6821  | 1649 | 205 | 10319 | 510  | 15485 | 1033 | 210 | 4808  | 308 | 8749  | 530  | 211 | 11643 | 242  | 16390 | 440  | 210 | 5237  | 700  |
| 209 | 3272  | 770  | 2413  | 751  | 203 | 2514  | 554  | 2535  | 870  | 212 | 2698  | 1241 | 1870  | 1691 | 203 | 1689  | 723  | 3097  | 1324 | 205 | 743   | 200 | 787   | 404  | 206 | 1373  | 291  | 1382  | 536  | 211 | 1722  | 790  |
| 210 | 7461  | 775  | 6994  | 1149 | 210 | 5572  | 801  | 4968  | 1356 | 213 | 5842  | 881  | 5722  | 1275 | 210 | 12902 | 562  | 16878 | 995  | 208 | 8256  | 479 | 13366 | 781  | 204 | 8961  | 811  | 12684 | 1709 | 210 | 6978  | 826  |
| 205 | 3150  | 1038 | 2086  | 1475 | 204 | 3072  | 1185 | 2259  | 1452 | 202 | 2982  | 667  | 2700  | 997  | 209 | 3165  | 542  | 2986  | 799  | 199 | 1275  | 551 | 1298  | 1031 | 207 | 397   | 543  | 1316  | 799  | 210 | 2116  | 981  |
| 213 | 2658  | 1085 | 1594  | 1522 | 205 | 2142  | 763  | 1734  | 1123 | 205 | 2547  | 661  | 1708  | 845  | 205 | 2030  | 277  | 4408  | 624  | 208 | 902   | 183 | 1234  | 312  | 208 | 1546  | 607  | 1329  | 867  | 211 | 1817  | 790  |
| 203 | 1940  | 792  | 1623  | 1309 | 209 | 1645  | 584  | 1599  | 925  | 211 | 2545  | 908  | 1647  | 1233 | 207 | 2252  | 855  | 4837  | 3016 | 209 | 938   | 326 | 963   | 578  | 208 | 1048  | 613  | 1188  | 949  | 209 | 2577  | 1153 |
| 207 | 3291  | 1204 | 1514  | 1424 | 199 | 1746  | 549  | 1469  | 811  | 207 | 2308  | 1171 | 1271  | 1650 | 204 | 3285  | 559  | 6352  | 851  | 204 | 1031  | 483 | 854   | 849  | 208 | 1472  | 502  | 1432  | 864  | 210 | 2139  | 1141 |
| 206 | 2009  | 760  | 1230  | 1082 | 204 | 1724  | 884  | 1367  | 1488 | 212 | 2187  | 821  | 1271  | 1080 | 207 | 1388  | 365  | 1676  | 629  | 208 | 859   | 458 | 1046  | 927  | 209 | 1537  | 355  | 1396  | 628  | 210 | 2549  | 872  |
| 205 | 2506  | 1021 | 1564  | 1418 | 210 | 1911  | 802  | 1267  | 1281 | 212 | 2226  | 803  | 1543  | 1064 | 205 | 1521  | 608  | 2265  | 1128 | 203 | 798   | 331 | 914   | 605  | 206 | 1366  | 439  | 1631  | 664  | 208 | 2231  | 1020 |
| 204 | 2307  | 827  | 1491  | 1132 | 199 | 1553  | 500  | 1249  | 774  | 207 | 2518  | 801  | 1612  | 1214 | 204 | 2009  | 649  | 4729  | 1328 | 209 | 930   | 293 | 1727  | 551  | 208 | 1574  | 526  | 1235  | 799  | 207 | 2171  | 808  |
| 208 | 2682  | 1133 |       |      |     |       |      |       |      |     |       |      |       |      |     |       |      |       |      |     |       |     |       |      |     |       |      |       |      |     |       |      |

|     |       |      |       |       |     |       |      |       |       |     |       |      |       |      |     |       |      |       |      |     |       |     |       |      |     |       |     |       |      |     |       |      |
|-----|-------|------|-------|-------|-----|-------|------|-------|-------|-----|-------|------|-------|------|-----|-------|------|-------|------|-----|-------|-----|-------|------|-----|-------|-----|-------|------|-----|-------|------|
| 211 | 40525 | 1140 | 23937 | 1270  | 205 | 25476 | 673  | 21305 | 1016  | 212 | 35333 | 951  | 23207 | 1247 | 207 | 36726 | 472  | 25585 | 767  | 209 | 26520 | 406 | 24131 | 677  | 212 | 27963 | 607 | 26380 | 1032 | 210 | 22346 | 1026 |
| 196 | 22180 | 6693 | 14467 | 15930 | 204 | 14614 | 847  | 12711 | 1153  | 209 | 21819 | 619  | 20090 | 904  | 208 | 15655 | 671  | 17094 | 1014 | 204 | 6236  | 445 | 6271  | 792  | 209 | 7087  | 353 | 7831  | 644  | 213 | 7046  | 1223 |
| 206 | 9699  | 4922 | 8821  | 14222 | 208 | 9689  | 1031 | 11057 | 1361  | 206 | 12392 | 1123 | 9445  | 1489 | 211 | 12394 | 903  | 16214 | 2674 | 203 | 8988  | 454 | 11178 | 855  | 209 | 6563  | 471 | 8326  | 891  | 210 | 6346  | 1336 |
| 199 | 7619  | 836  | 7089  | 1265  | 211 | 6431  | 400  | 7380  | 620   | 209 | 18133 | 1048 | 15566 | 1361 | 207 | 15090 | 909  | 17558 | 1970 | 207 | 4788  | 667 | 4053  | 997  | 202 | 9008  | 452 | 10079 | 739  | 209 | 8270  | 1115 |
| 203 | 4720  | 966  | 4907  | 1191  | 205 | 7348  | 771  | 7853  | 1033  | 209 | 3551  | 1237 | 2093  | 1979 | 208 | 3127  | 549  | 7045  | 1072 | 212 | 1356  | 363 | 2433  | 877  | 211 | 1799  | 580 | 1336  | 899  | 209 | 4062  | 1562 |
| 206 | 10756 | 983  | 10476 | 1147  | 202 | 2019  | 749  | 1821  | 1262  | 207 | 2879  | 845  | 1962  | 1247 | 210 | 2860  | 737  | 4146  | 1215 | 211 | 1121  | 319 | 1243  | 559  | 210 | 1743  | 566 | 1373  | 1031 | 211 | 2718  | 899  |
| 203 | 11755 | 892  | 11515 | 1063  | 210 | 2307  | 778  | 1563  | 1042  | 208 | 2632  | 1017 | 1852  | 1442 | 205 | 2390  | 882  | 5444  | 1761 | 209 | 835   | 399 | 1240  | 772  | 209 | 1862  | 670 | 1296  | 1086 | 204 | 1712  | 824  |
| 212 | 10337 | 1271 | 10929 | 1571  | 212 | 3729  | 545  | 4443  | 988   | 210 | 2733  | 864  | 2514  | 1445 | 210 | 3224  | 889  | 2670  | 1655 | 206 | 1134  | 322 | 1217  | 871  | 209 | 2183  | 685 | 1985  | 1087 | 205 | 2559  | 823  |
| 201 | 4304  | 1152 | 2918  | 1505  | 209 | 3960  | 512  | 4267  | 990   | 211 | 2023  | 843  | 1839  | 1680 | 210 | 2960  | 1525 | 3158  | 4367 | 210 | 828   | 387 | 1142  | 865  | 202 | 1544  | 577 | 1371  | 896  | 207 | 3341  | 991  |
| 204 | 8233  | 1089 | 6029  | 2459  | 209 | 6836  | 692  | 5832  | 1464  | 213 | 13826 | 1813 | 11173 | 3971 | 211 | 12981 | 1304 | 15357 | 4136 | 210 | 5304  | 299 | 5985  | 602  | 210 | 8633  | 568 | 10595 | 945  | 211 | 10528 | 1186 |
| 202 | 2806  | 531  | 2421  | 843   | 210 | 5589  | 887  | 4809  | 1306  | 203 | 8775  | 1461 | 7975  | 3573 | 211 | 3085  | 596  | 4772  | 924  | 212 | 1872  | 228 | 2351  | 459  | 210 | 1982  | 388 | 2159  | 615  | 211 | 2821  | 684  |
| 205 | 2414  | 689  | 1881  | 980   | 211 | 2145  | 675  | 1495  | 956   | 210 | 2714  | 700  | 1607  | 886  | 203 | 1809  | 685  | 2274  | 1302 | 210 | 858   | 290 | 909   | 523  | 207 | 1513  | 393 | 1469  | 778  | 210 | 2127  | 489  |
| 205 | 3384  | 687  | 7731  | 1111  | 210 | 2188  | 570  | 1622  | 750   | 206 | 2834  | 922  | 1579  | 1469 | 201 | 1775  | 589  | 4188  | 1290 | 210 | 910   | 406 | 996   | 777  | 199 | 1523  | 612 | 1493  | 1178 | 209 | 2245  | 761  |
| 202 | 2013  | 556  | 1755  | 991   | 212 | 2326  | 653  | 1940  | 1010  | 210 | 1775  | 687  | 1405  | 1103 | 209 | 2174  | 427  | 6632  | 908  | 207 | 861   | 425 | 677   | 691  | 203 | 1896  | 532 | 1345  | 918  | 207 | 1852  | 636  |
| 205 | 5756  | 830  | 3907  | 1019  | 208 | 2481  | 865  | 1768  | 879   | 205 | 2434  | 905  | 1688  | 1489 | 209 | 1517  | 637  | 1591  | 1073 | 209 | 1116  | 412 | 964   | 712  | 202 | 1652  | 577 | 1455  | 1036 | 208 | 2147  | 568  |
| 204 | 11953 | 973  | 8670  | 1163  | 209 | 8160  | 950  | 6400  | 1383  | 205 | 11680 | 803  | 10459 | 1383 | 208 | 16920 | 852  | 12799 | 3230 | 210 | 8846  | 285 | 9371  | 574  | 205 | 10445 | 397 | 11605 | 618  | 206 | 11558 | 919  |
| 207 | 2929  | 1121 | 2039  | 1361  | 208 | 3069  | 637  | 2829  | 997   | 212 | 9408  | 669  | 8427  | 1189 | 212 | 1372  | 298  | 2245  | 660  | 210 | 878   | 175 | 1108  | 388  | 208 | 1254  | 305 | 1262  | 512  | 209 | 1594  | 596  |
| 210 | 3120  | 1166 | 2088  | 1839  | 207 | 3639  | 637  | 3142  | 942   | 210 | 2152  | 979  | 1719  | 1751 | 210 | 1178  | 375  | 1442  | 765  | 209 | 752   | 294 | 869   | 590  | 209 | 1213  | 562 | 1234  | 1220 | 209 | 1808  | 557  |
| 209 | 1923  | 735  | 1615  | 988   | 210 | 3355  | 674  | 2058  | 1000  | 201 | 2145  | 775  | 1854  | 1020 | 206 | 1110  | 304  | 2061  | 574  | 209 | 790   | 204 | 972   | 459  | 210 | 1101  | 463 | 1264  | 908  | 208 | 1856  | 669  |
| 209 | 1931  | 582  | 1747  | 932   | 210 | 3160  | 1088 | 1693  | 1383  | 207 | 2620  | 786  | 1650  | 1159 | 203 | 1569  | 564  | 1953  | 304  | 202 | 1026  | 458 | 855   | 700  | 205 | 1385  | 454 | 1181  | 950  | 210 | 1790  | 915  |
| 209 | 1680  | 583  | 1585  | 1078  | 213 | 1920  | 677  | 1415  | 970   | 207 | 2622  | 719  | 2078  | 983  | 212 | 1351  | 600  | 1676  | 1102 | 207 | 736   | 272 | 802   | 482  | 206 | 1161  | 454 | 1019  | 711  | 205 | 1642  | 790  |
| 208 | 24148 | 3302 | 19308 | 6980  | 209 | 11648 | 1062 | 11542 | 1893  | 210 | 14080 | 1247 | 10494 | 1678 | 204 | 15769 | 507  | 20556 | 988  | 207 | 12288 | 677 | 13548 | 1086 | 208 | 15132 | 628 | 13377 | 1045 | 205 | 11496 | 1107 |
| 206 | 38418 | 2262 | 23154 | 6025  | 207 | 26439 | 775  | 22333 | 1083  | 206 | 36403 | 2964 | 22475 | 7184 | 209 | 20773 | 429  | 24541 | 81   | 209 | 22818 | 722 | 23153 | 953  | 208 | 28902 | 452 | 25040 | 799  | 209 | 20923 | 1147 |
| 200 | 3332  | 880  | 4719  | 1235  | 209 | 9446  | 1919 | 10868 | 7017  | 210 | 13527 | 1754 | 14999 | 6521 | 210 | 2008  | 587  | 5014  | 1509 | 209 | 1784  | 679 | 945   | 830  | 203 | 1903  | 641 | 1363  | 1008 | 204 | 2541  | 771  |
| 208 | 3952  | 897  | 2809  | 1181  | 207 | 7981  | 834  | 10954 | 3232  | 211 | 2227  | 674  | 1836  | 923  | 207 | 2107  | 383  | 4053  | 564  | 209 | 1011  | 495 | 764   | 924  | 207 | 1299  | 476 | 1112  | 716  | 207 | 2903  | 1224 |
| 212 | 7035  | 957  | 5877  | 1162  | 208 | 8068  | 3582 | 8755  | 9332  | 210 | 2880  | 649  | 2253  | 946  | 213 | 1655  | 373  | 1712  | 603  | 209 | 1381  | 386 | 1168  | 624  | 206 | 1935  | 655 | 1541  | 1001 | 207 | 3470  | 1352 |
| 207 | 8677  | 962  | 6268  | 1239  | 205 | 8906  | 4910 | 8883  | 10205 | 204 | 3727  | 912  | 3373  | 204  | 208 | 1981  | 905  | 3799  | 2858 | 210 | 975   | 397 | 917   | 638  | 205 | 1593  | 597 | 1175  | 825  | 202 | 1308  | 1258 |
| 209 | 28134 | 1169 | 19850 | 1301  | 205 | 22776 | 819  | 19709 | 1539  | 212 | 29131 | 783  | 24808 | 1294 | 211 | 28272 | 699  | 26101 | 1365 | 204 | 15322 | 440 | 20504 | 817  | 212 | 23698 | 550 | 24058 | 791  | 205 | 15966 | 1148 |
| 200 | 25227 | 2568 | 18489 | 6939  | 209 | 18096 | 910  | 16087 | 1438  | 209 | 23400 | 745  | 21065 | 1077 | 211 | 23928 | 577  | 25011 | 1040 | 207 | 11171 | 546 | 14846 | 940  | 206 | 13163 | 663 | 16305 | 910  | 208 | 11149 | 1282 |
| 206 | 38157 | 1011 | 24099 | 1192  | 205 | 31114 | 799  | 24790 | 1310  | 209 | 34870 | 1175 | 24657 | 4603 | 207 | 36518 | 544  | 28277 | 992  | 212 | 26760 | 483 | 25139 | 762  | 208 | 30392 | 483 | 25855 | 1044 | 212 | 26030 | 1576 |
| 207 | 25842 | 1170 | 19003 | 2278  | 212 | 17222 | 588  | 15041 | 877   | 208 | 18698 | 870  | 14150 | 1180 | 206 | 22886 | 717  | 21591 | 1152 | 212 | 9660  | 621 | 10607 | 949  | 202 | 19154 | 515 | 22336 | 813  | 209 | 14351 | 1287 |
| 207 | 8445  | 1671 | 7802  | 4060  | 211 | 6948  | 745  | 6111  | 1131  | 208 | 2415  | 834  | 1781  | 1365 | 210 | 2148  | 505  | 3272  | 1001 | 208 | 1085  | 428 | 984   | 996  | 208 | 1679  | 415 | 1799  | 876  | 210 | 2535  | 1101 |
| 205 | 5019  | 901  | 4305  | 1203  | 208 | 7513  | 1055 | 7501  | 1549  | 208 | 2079  | 685  | 1888  | 1092 | 211 | 1570  | 757  | 1720  | 2044 | 207 | 1034  | 518 | 1003  | 901  | 205 | 1842  | 710 | 1549  | 1107 | 204 | 3122  | 1287 |
| 205 | 5398  | 929  | 4158  | 1032  | 206 | 3930  | 977  | 3883  | 1628  | 208 | 1475  | 479  | 1489  | 895  | 214 | 1863  | 766  | 3568  | 2079 | 210 | 643   | 196 | 671   | 537  | 208 | 1691  | 670 | 1486  | 1164 | 207 | 2332  | 714  |
| 207 | 2829  | 733  | 2196  | 950   | 211 | 3888  | 860  | 2528  | 1145  | 204 | 2277  | 697  | 2004  | 1100 | 208 | 2451  | 655  | 5195  | 1149 | 210 | 821   | 202 | 891   | 589  | 208 | 1882  | 552 | 1890  | 1019 | 206 | 2380  | 654  |
| 210 | 2730  | 830  | 2308  | 1171  | 212 | 2275  | 799  | 1434  | 1166  | 202 | 2820  | 788  | 2076  | 1107 | 206 | 1668  | 784  | 1837  | 1307 | 204 | 965   | 185 | 1554  | 440  | 204 | 1584  | 473 | 1517  | 873  | 210 | 2153  | 771  |
| 208 | 3464  | 819  | 2519  | 1120  | 213 | 3038  | 824  | 2203  | 992   | 205 | 3577  | 857  | 2474  | 1190 | 203 | 2884  | 374  | 4151  | 908  | 212 | 1834  | 365 | 1890  | 591  | 205 | 1980  | 425 | 2312  | 819  | 213 | 3465  | 941  |
| 209 | 4224  | 833  | 3764  | 1369  | 209 | 2308  | 676  | 1730  | 1218  | 211 | 2672  | 928  | 1277  | 1096 | 208 | 1030  | 481  | 1179  | 1743 | 207 | 712   | 331 | 849   | 610  | 206 | 1271  | 370 | 1077  | 617  | 208 | 2397  | 1124 |
| 206 | 6041  | 1231 | 4703  | 1562  | 209 | 2101  | 580  | 5581  | 1092  | 212 | 2405  | 722  | 2077  | 1074 | 209 | 1182  | 1758 | 1358  | 8537 | 207 | 895   | 290 | 1404  | 503  | 207 | 1584  | 548 | 1500  | 958  | 209 | 2686  | 1413 |
| 209 | 5105  | 1222 | 4400  | 1542  | 207 | 3290  | 583  | 4457  | 1040  | 207 | 2799  | 798  | 1584  | 1003 | 210 | 1449  | 411  | 1358  | 744  | 204 | 921   | 311 | 899   | 580  | 203 | 1931  | 587 | 1162  | 827  | 207 | 2131  | 917  |
| 202 | 2702  | 1049 | 1662  | 1372  | 204 | 3619  | 472  | 3165  | 808   | 209 | 2313  | 622  | 1548  | 972  | 211 | 1523  | 431  | 3197  | 867  | 209 | 791   | 242 | 831   | 450  | 206 | 1606  | 441 | 1742  | 846  | 207 | 2019  | 782  |
| 210 | 2323  | 761  | 1584  | 1129  | 209 | 3692  | 678  | 3835  | 1072  | 208 | 1600  | 496  | 1581  | 976  | 212 | 1369  | 352  | 1819  | 861  | 209 | 796   | 214 | 985   | 460  | 207 | 1314  | 457 | 1300  | 814  | 209 | 2275  | 754  |
| 210 | 2009  | 743  | 1933  | 892   | 209 | 2520  | 803  | 2035  | 1112  | 210 | 1919  | 544  | 1366  | 826  | 208 | 1073  | 345  | 1221  | 708  | 208 | 733   | 338 | 769   | 84   |     |       |     |       |      |     |       |      |

|     |       |      |       |       |     |       |      |       |      |     |       |      |       |      |     |       |      |       |      |     |       |     |       |      |     |       |      |       |      |     |       |      |
|-----|-------|------|-------|-------|-----|-------|------|-------|------|-----|-------|------|-------|------|-----|-------|------|-------|------|-----|-------|-----|-------|------|-----|-------|------|-------|------|-----|-------|------|
| 209 | 6887  | 948  | 5216  | 1362  | 208 | 8509  | 854  | 9504  | 1215 | 207 | 7009  | 620  | 8033  | 1260 | 213 | 6403  | 530  | 8742  | 1045 | 204 | 2471  | 244 | 3129  | 488  | 209 | 3565  | 460  | 3874  | 821  | 207 | 3129  | 656  |
| 211 | 4948  | 1056 | 4641  | 1462  | 204 | 6891  | 1635 | 8166  | 5498 | 208 | 2449  | 1041 | 1813  | 1649 | 209 | 2659  | 748  | 4047  | 1362 | 206 | 707   | 247 | 705   | 511  | 208 | 1981  | 807  | 1166  | 1122 | 201 | 2336  | 971  |
| 210 | 2279  | 866  | 1901  | 1296  | 209 | 2913  | 1077 | 2744  | 2275 | 205 | 3302  | 1225 | 2350  | 3073 | 209 | 3095  | 886  | 7619  | 3254 | 209 | 686   | 345 | 840   | 681  | 207 | 1871  | 582  | 1306  | 961  | 202 | 1692  | 458  |
| 205 | 9608  | 1182 | 9056  | 1519  | 207 | 7598  | 852  | 7424  | 1424 | 206 | 6697  | 1082 | 6491  | 2962 | 208 | 6066  | 520  | 9189  | 1072 | 208 | 7022  | 341 | 11167 | 639  | 210 | 8428  | 730  | 11249 | 1133 | 206 | 6008  | 938  |
| 209 | 4577  | 1642 | 2169  | 2488  | 209 | 4241  | 774  | 4150  | 1177 | 212 | 4674  | 949  | 4330  | 1760 | 210 | 3205  | 1258 | 3605  | 1927 | 193 | 1051  | 346 | 933   | 493  | 202 | 1307  | 416  | 1391  | 767  | 210 | 1933  | 589  |
| 195 | 3252  | 1601 | 4065  | 2790  | 208 | 2690  | 771  | 2446  | 1215 | 210 | 2736  | 847  | 1896  | 1107 | 207 | 2369  | 814  | 3050  | 1051 | 199 | 778   | 299 | 1405  | 546  | 206 | 1287  | 424  | 1381  | 724  | 208 | 1743  | 562  |
| 207 | 2451  | 637  | 1991  | 964   | 210 | 3771  | 1250 | 2829  | 1837 | 205 | 3035  | 742  | 2256  | 1079 | 207 | 2497  | 832  | 5366  | 1350 | 206 | 1053  | 525 | 945   | 898  | 209 | 1433  | 399  | 1439  | 623  | 208 | 2021  | 942  |
| 201 | 3639  | 727  | 3211  | 1105  | 208 | 3574  | 938  | 2917  | 1581 | 206 | 3913  | 670  | 4100  | 1829 | 211 | 3464  | 674  | 5084  | 1322 | 207 | 2838  | 553 | 2544  | 693  | 202 | 2724  | 681  | 2470  | 1157 | 208 | 3153  | 792  |
| 204 | 3083  | 664  | 2492  | 950   | 207 | 1804  | 654  | 1444  | 1059 | 209 | 2164  | 871  | 1652  | 1365 | 205 | 1563  | 217  | 3889  | 420  | 213 | 841   | 369 | 892   | 749  | 213 | 1525  | 606  | 1323  | 1046 | 209 | 1758  | 516  |
| 208 | 2036  | 510  | 1790  | 793   | 210 | 2087  | 774  | 1376  | 1033 | 205 | 1745  | 814  | 1548  | 1417 | 211 | 1425  | 464  | 2730  | 969  | 209 | 791   | 367 | 868   | 870  | 208 | 1347  | 453  | 1334  | 903  | 207 | 2357  | 873  |
| 207 | 2712  | 685  | 1400  | 887   | 204 | 1585  | 811  | 1332  | 1206 | 206 | 2968  | 1111 | 1871  | 1414 | 201 | 1605  | 581  | 2056  | 994  | 206 | 1016  | 363 | 875   | 574  | 209 | 1490  | 405  | 1366  | 874  | 207 | 2548  | 824  |
| 208 | 2408  | 1177 | 1533  | 2107  | 204 | 2017  | 859  | 1663  | 1478 | 209 | 2868  | 984  | 2029  | 1860 | 202 | 1714  | 446  | 2065  | 701  | 206 | 696   | 220 | 735   | 622  | 207 | 1177  | 493  | 1123  | 870  | 208 | 2384  | 1068 |
| 199 | 1922  | 949  | 1458  | 1454  | 208 | 2221  | 618  | 1602  | 857  | 205 | 1799  | 804  | 1303  | 1240 | 214 | 1840  | 499  | 2724  | 923  | 210 | 818   | 396 | 771   | 846  | 208 | 1057  | 362  | 1074  | 607  | 209 | 2105  | 812  |
| 205 | 1839  | 949  | 1175  | 1492  | 209 | 1585  | 686  | 1387  | 1181 | 211 | 1873  | 581  | 1744  | 1064 | 213 | 2376  | 548  | 4887  | 851  | 206 | 1094  | 474 | 987   | 670  | 209 | 1052  | 576  | 1102  | 879  | 210 | 2184  | 764  |
| 212 | 2384  | 1211 | 1240  | 1545  | 206 | 2722  | 752  | 6523  | 1325 | 208 | 1758  | 745  | 1524  | 1118 | 212 | 1409  | 358  | 2623  | 1079 | 211 | 1107  | 459 | 849   | 711  | 207 | 1156  | 384  | 1167  | 644  | 207 | 2364  | 806  |
| 208 | 2285  | 877  | 2952  | 1332  | 206 | 1908  | 624  | 1429  | 926  | 206 | 4690  | 1071 | 8476  | 1804 | 200 | 2288  | 211  | 4918  | 430  | 210 | 935   | 495 | 737   | 932  | 207 | 1254  | 396  | 1253  | 753  | 208 | 1670  | 644  |
| 204 | 2632  | 1333 | 1654  | 2302  | 200 | 2007  | 618  | 1450  | 962  | 210 | 2313  | 1047 | 1382  | 1528 | 205 | 1140  | 475  | 1288  | 1101 | 208 | 1045  | 522 | 977   | 754  | 205 | 1240  | 360  | 1084  | 674  | 209 | 2216  | 813  |
| 210 | 2439  | 843  | 1570  | 1151  | 209 | 1678  | 598  | 1502  | 1084 | 210 | 2428  | 790  | 2059  | 1604 | 207 | 2310  | 416  | 4022  | 1767 | 207 | 1335  | 381 | 1571  | 632  | 206 | 1254  | 394  | 1504  | 755  | 208 | 3609  | 852  |
| 207 | 7453  | 841  | 6055  | 1126  | 211 | 4830  | 846  | 3354  | 1270 | 208 | 3363  | 535  | 3060  | 995  | 210 | 7432  | 621  | 11256 | 737  | 210 | 3917  | 449 | 4490  | 687  | 203 | 3728  | 564  | 4457  | 1076 | 206 | 3524  | 759  |
| 206 | 5682  | 988  | 6025  | 1570  | 206 | 2149  | 585  | 1620  | 803  | 210 | 3119  | 911  | 2564  | 1111 | 204 | 1745  | 897  | 1879  | 2389 | 201 | 790   | 534 | 1299  | 1550 | 208 | 1399  | 531  | 1102  | 864  | 205 | 2132  | 981  |
| 202 | 2438  | 711  | 1782  | 1282  | 212 | 2132  | 752  | 1667  | 1203 | 212 | 2850  | 692  | 2555  | 1014 | 211 | 1488  | 852  | 2406  | 2375 | 208 | 925   | 659 | 920   | 2455 | 207 | 1484  | 686  | 1219  | 1107 | 206 | 2621  | 853  |
| 211 | 5658  | 891  | 3455  | 1143  | 209 | 3125  | 527  | 2867  | 964  | 211 | 3635  | 808  | 3415  | 1171 | 211 | 8228  | 672  | 11203 | 1176 | 212 | 2925  | 715 | 3841  | 2480 | 203 | 4364  | 484  | 5027  | 633  | 207 | 3268  | 937  |
| 210 | 3065  | 1419 | 1746  | 2299  | 204 | 1611  | 503  | 1456  | 806  | 209 | 2117  | 722  | 1567  | 1210 | 207 | 1781  | 586  | 2547  | 1206 | 205 | 1145  | 620 | 1587  | 1448 | 205 | 1426  | 534  | 1366  | 850  | 207 | 2995  | 1380 |
| 207 | 4328  | 798  | 4879  | 1160  | 210 | 2339  | 834  | 1741  | 1372 | 211 | 2849  | 1053 | 2027  | 1423 | 209 | 1163  | 301  | 1365  | 801  | 209 | 837   | 183 | 1126  | 410  | 207 | 1600  | 436  | 1463  | 671  | 210 | 2183  | 967  |
| 204 | 15371 | 1354 | 13888 | 3603  | 209 | 12328 | 553  | 12221 | 976  | 212 | 18488 | 464  | 18844 | 702  | 211 | 16122 | 196  | 18834 | 501  | 211 | 10062 | 207 | 16343 | 445  | 207 | 19333 | 553  | 22377 | 806  | 205 | 10564 | 802  |
| 205 | 5588  | 687  | 8716  | 1266  | 211 | 7003  | 1619 | 8411  | 5518 | 210 | 2510  | 583  | 2102  | 1116 | 211 | 3083  | 536  | 5148  | 1477 | 209 | 1501  | 149 | 2255  | 352  | 209 | 2782  | 702  | 2927  | 1102 | 209 | 2681  | 947  |
| 211 | 6815  | 895  | 8164  | 1115  | 207 | 3654  | 645  | 3122  | 967  | 209 | 2603  | 879  | 1900  | 1348 | 204 | 2752  | 461  | 4134  | 909  | 206 | 1125  | 244 | 1227  | 651  | 209 | 3121  | 642  | 2874  | 1017 | 207 | 2819  | 941  |
| 208 | 9760  | 886  | 8697  | 1225  | 204 | 6361  | 740  | 5965  | 1103 | 206 | 7438  | 1027 | 5409  | 1392 | 202 | 9066  | 453  | 13077 | 842  | 211 | 4357  | 263 | 7274  | 711  | 209 | 7641  | 445  | 10522 | 968  | 210 | 6476  | 710  |
| 199 | 3291  | 3805 | 8183  | 11257 | 199 | 3886  | 953  | 3479  | 1307 | 207 | 1625  | 728  | 1426  | 1425 | 208 | 1717  | 856  | 1424  | 1795 | 207 | 869   | 152 | 1259  | 328  | 209 | 1491  | 501  | 1101  | 777  | 208 | 1681  | 1085 |
| 204 | 9887  | 1586 | 8152  | 3043  | 202 | 6414  | 769  | 6463  | 1078 | 206 | 5923  | 590  | 4933  | 872  | 210 | 14018 | 611  | 18197 | 1054 | 205 | 7283  | 170 | 12566 | 342  | 209 | 15646 | 529  | 19046 | 768  | 207 | 7807  | 599  |
| 211 | 3306  | 747  | 3088  | 1255  | 211 | 3500  | 1057 | 2441  | 1581 | 201 | 2810  | 1036 | 2046  | 1456 | 206 | 2723  | 467  | 2807  | 801  | 205 | 1501  | 427 | 1366  | 711  | 206 | 1626  | 600  | 1370  | 950  | 210 | 2233  | 688  |
| 210 | 2867  | 784  | 2533  | 1136  | 212 | 2048  | 937  | 1603  | 1624 | 208 | 1948  | 1203 | 1818  | 2350 | 210 | 1675  | 659  | 1954  | 1445 | 210 | 927   | 274 | 986   | 511  | 210 | 1357  | 506  | 1535  | 926  | 206 | 2854  | 1144 |
| 201 | 2753  | 805  | 1846  | 1145  | 213 | 2959  | 931  | 1753  | 1206 | 203 | 2928  | 639  | 1639  | 1204 | 212 | 2046  | 586  | 3062  | 1189 | 204 | 934   | 292 | 1005  | 802  | 211 | 1362  | 528  | 1350  | 657  | 210 | 2207  | 1197 |
| 204 | 2199  | 771  | 1409  | 1053  | 208 | 2509  | 636  | 1547  | 957  | 205 | 1971  | 804  | 1516  | 1272 | 211 | 2599  | 896  | 2639  | 1322 | 196 | 1023  | 401 | 917   | 862  | 207 | 1322  | 427  | 1357  | 891  | 207 | 2061  | 997  |
| 206 | 2301  | 562  | 1720  | 810   | 208 | 2377  | 801  | 1649  | 1111 | 203 | 2321  | 794  | 1792  | 1386 | 209 | 1857  | 582  | 2343  | 955  | 206 | 753   | 291 | 692   | 583  | 210 | 1447  | 665  | 1242  | 1255 | 206 | 2776  | 1126 |
| 197 | 2429  | 855  | 1662  | 1285  | 205 | 1666  | 624  | 1689  | 1131 | 207 | 2886  | 1313 | 1258  | 1916 | 205 | 1286  | 417  | 1869  | 747  | 210 | 828   | 258 | 917   | 585  | 213 | 1269  | 655  | 1254  | 1450 | 207 | 2104  | 1064 |
| 205 | 2695  | 1007 | 1497  | 1266  | 205 | 2146  | 737  | 1560  | 1271 | 208 | 2946  | 1167 | 1307  | 1498 | 206 | 1891  | 338  | 4826  | 730  | 211 | 936   | 368 | 982   | 583  | 209 | 1030  | 388  | 1067  | 817  | 208 | 1570  | 499  |
| 205 | 2684  | 969  | 1540  | 1357  | 207 | 2281  | 821  | 1539  | 1195 | 204 | 2150  | 736  | 1687  | 1179 | 207 | 1400  | 404  | 2202  | 796  | 209 | 971   | 380 | 858   | 598  | 207 | 1180  | 472  | 1197  | 951  | 209 | 2326  | 907  |
| 211 | 2300  | 832  | 1542  | 1251  | 207 | 1709  | 634  | 1306  | 975  | 207 | 2884  | 972  | 2186  | 1247 | 207 | 1407  | 643  | 2063  | 1524 | 210 | 959   | 306 | 957   | 533  | 210 | 1186  | 566  | 1195  | 851  | 209 | 3239  | 1027 |
| 207 | 2721  | 915  | 1764  | 1201  | 209 | 2118  | 873  | 1213  | 1284 | 208 | 2405  | 706  | 1568  | 1117 | 207 | 1517  | 502  | 2181  | 1265 | 210 | 1868  | 370 | 917   | 731  | 212 | 2432  | 1111 | 1157  | 1391 | 196 | 2065  | 1075 |
| 207 | 2381  | 800  | 1626  | 1367  | 208 | 1435  | 557  | 1246  | 984  | 207 | 2502  | 1055 | 1352  | 1892 | 202 | 1560  | 774  | 1844  | 1399 | 209 | 1390  | 583 | 1474  | 810  | 201 | 2179  | 364  | 1184  | 1431 | 197 | 2321  | 633  |
| 208 | 2556  | 1291 | 1259  | 1748  | 204 | 1405  | 529  | 1344  | 854  | 209 | 2887  | 971  | 1404  | 1666 | 203 | 1392  | 475  | 1573  | 1096 | 206 | 1212  | 555 | 1219  | 809  | 209 | 1374  | 497  | 1190  | 772  | 209 | 3440  | 1258 |
| 210 | 3775  | 923  | 2633  | 1211  | 208 | 2537  | 560  | 1977  | 748  | 206 | 3496  | 687  | 2865  | 950  | 214 | 4936  | 810  | 7930  | 3145 | 207 | 2011  | 342 | 3059  | 714  | 209 | 1808  | 341  | 1835  | 585  | 212 | 3104  | 801  |
| 207 | 2849  | 813  | 1843  | 1221  |     |       |      |       |      |     |       |      |       |      |     |       |      |       |      |     |       |     |       |      |     |       |      |       |      |     |       |      |

|     |       |      |       |      |     |       |      |       |      |     |       |      |       |      |     |       |      |       |      |     |       |     |       |      |     |       |     |       |      |     |       |      |
|-----|-------|------|-------|------|-----|-------|------|-------|------|-----|-------|------|-------|------|-----|-------|------|-------|------|-----|-------|-----|-------|------|-----|-------|-----|-------|------|-----|-------|------|
| 206 | 11548 | 989  | 10104 | 1460 | 205 | 6537  | 473  | 6526  | 831  | 211 | 6910  | 1025 | 5877  | 1654 | 209 | 5794  | 816  | 8207  | 1551 | 208 | 3722  | 245 | 3935  | 566  | 205 | 3949  | 469 | 7163  | 794  | 207 | 7859  | 897  |
| 207 | 4954  | 876  | 5006  | 1442 | 208 | 5044  | 1380 | 4782  | 2301 | 204 | 6508  | 693  | 3868  | 1066 | 210 | 3063  | 397  | 4333  | 859  | 211 | 1898  | 336 | 2265  | 639  | 206 | 1340  | 374 | 1976  | 711  | 209 | 3505  | 847  |
| 208 | 3280  | 1148 | 2189  | 1581 | 207 | 6693  | 1437 | 6712  | 2591 | 203 | 4918  | 859  | 4514  | 1286 | 207 | 2316  | 651  | 2576  | 1152 | 203 | 1714  | 205 | 2127  | 513  | 207 | 1000  | 836 | 2305  | 2007 | 207 | 2223  | 455  |
| 207 | 3280  | 1147 | 1734  | 1328 | 206 | 4411  | 884  | 3207  | 1136 | 202 | 2725  | 859  | 1877  | 1166 | 204 | 1665  | 701  | 1850  | 1197 | 207 | 700   | 342 | 746   | 688  | 205 | 2177  | 778 | 1204  | 1113 | 199 | 1474  | 630  |
| 202 | 3902  | 941  | 2678  | 1215 | 202 | 2116  | 859  | 1626  | 1505 | 209 | 3131  | 956  | 1398  | 1065 | 199 | 1533  | 402  | 2377  | 887  | 209 | 1146  | 338 | 1060  | 529  | 208 | 1738  | 619 | 1415  | 888  | 200 | 1814  | 770  |
| 203 | 2927  | 1091 | 3105  | 1619 | 206 | 2386  | 730  | 1878  | 1118 | 211 | 1425  | 538  | 1399  | 1065 | 210 | 1659  | 485  | 3171  | 831  | 208 | 734   | 187 | 957   | 448  | 207 | 1263  | 571 | 1128  | 973  | 210 | 2403  | 842  |
| 202 | 3529  | 1100 | 2350  | 1473 | 206 | 3529  | 624  | 3348  | 899  | 207 | 3262  | 1062 | 1735  | 1408 | 205 | 1562  | 524  | 1845  | 921  | 210 | 725   | 43  | 811   | 111  | 202 | 1610  | 736 | 1229  | 1021 | 206 | 2330  | 719  |
| 211 | 4500  | 987  | 3521  | 1563 | 205 | 3778  | 809  | 3028  | 1136 | 210 | 3765  | 574  | 3545  | 882  | 209 | 4887  | 355  | 5846  | 698  | 209 | 2361  | 394 | 2918  | 771  | 212 | 2841  | 472 | 3649  | 780  | 210 | 2620  | 405  |
| 211 | 2153  | 618  | 1946  | 1062 | 211 | 2611  | 675  | 2527  | 1052 | 210 | 2383  | 714  | 1826  | 1070 | 209 | 1743  | 523  | 1501  | 772  | 207 | 990   | 385 | 991   | 640  | 205 | 1732  | 627 | 1641  | 987  | 204 | 1772  | 368  |
| 211 | 2397  | 1006 | 1401  | 1473 | 207 | 1638  | 553  | 1572  | 945  | 209 | 2526  | 855  | 1879  | 1187 | 207 | 1460  | 1077 | 1138  | 3954 | 204 | 606   | 269 | 654   | 590  | 202 | 1650  | 643 | 1218  | 1073 | 207 | 1879  | 620  |
| 210 | 2030  | 1013 | 1729  | 1862 | 211 | 1995  | 565  | 1719  | 822  | 210 | 2205  | 743  | 1771  | 1111 | 210 | 2640  | 986  | 3242  | 1575 | 207 | 699   | 222 | 859   | 614  | 206 | 1095  | 699 | 901   | 1138 | 207 | 1542  | 733  |
| 208 | 2380  | 938  | 1268  | 1852 | 207 | 1575  | 743  | 1306  | 1389 | 209 | 2079  | 616  | 1632  | 888  | 212 | 1704  | 493  | 1858  | 931  | 207 | 694   | 328 | 837   | 678  | 204 | 1237  | 425 | 1101  | 817  | 206 | 1687  | 573  |
| 209 | 2446  | 770  | 1256  | 975  | 201 | 1661  | 642  | 1296  | 999  | 208 | 2993  | 947  | 2176  | 1402 | 207 | 1562  | 348  | 1415  | 682  | 210 | 756   | 192 | 1027  | 536  | 206 | 993   | 218 | 1032  | 505  | 210 | 2087  | 902  |
| 210 | 1873  | 652  | 1456  | 1092 | 209 | 1364  | 373  | 1285  | 710  | 212 | 1990  | 421  | 1795  | 685  | 209 | 2398  | 733  | 1889  | 1364 | 201 | 779   | 132 | 1039  | 321  | 205 | 1094  | 421 | 1179  | 774  | 209 | 1308  | 595  |
| 209 | 1875  | 906  | 1590  | 1423 | 210 | 2004  | 793  | 1742  | 1282 | 208 | 2114  | 590  | 1542  | 938  | 207 | 2707  | 903  | 2858  | 1896 | 205 | 824   | 258 | 1168  | 608  | 208 | 1317  | 571 | 1219  | 891  | 208 | 2046  | 642  |
| 203 | 2909  | 1051 | 1929  | 1459 | 208 | 4225  | 812  | 4256  | 1102 | 207 | 2039  | 711  | 1545  | 1149 | 207 | 1368  | 833  | 1726  | 3181 | 206 | 769   | 219 | 884   | 622  | 200 | 1787  | 685 | 980   | 1111 | 204 | 1504  | 338  |
| 201 | 2817  | 814  | 609   | 1165 | 207 | 4030  | 960  | 3769  | 1334 | 207 | 3413  | 1237 | 2896  | 1454 | 207 | 2236  | 397  | 4132  | 972  | 205 | 776   | 174 | 1091  | 475  | 208 | 1178  | 373 | 1331  | 685  | 209 | 1367  | 665  |
| 203 | 2568  | 1109 | 1586  | 1676 | 207 | 1919  | 652  | 1448  | 1160 | 209 | 3167  | 948  | 2367  | 1448 | 207 | 1586  | 553  | 2243  | 935  | 207 | 741   | 257 | 986   | 547  | 206 | 1447  | 476 | 1209  | 810  | 206 | 2406  | 994  |
| 202 | 6448  | 1154 | 6032  | 1455 | 202 | 2672  | 662  | 2060  | 953  | 205 | 2546  | 984  | 2075  | 1422 | 209 | 1755  | 566  | 2741  | 1050 | 205 | 771   | 383 | 816   | 788  | 205 | 1994  | 701 | 1513  | 1018 | 204 | 2455  | 790  |
| 209 | 5198  | 1025 | 6266  | 1548 | 210 | 2204  | 793  | 1666  | 1258 | 203 | 1898  | 881  | 1643  | 1576 | 211 | 1828  | 521  | 2762  | 868  | 208 | 777   | 203 | 828   | 469  | 203 | 1210  | 518 | 1200  | 928  | 212 | 1936  | 874  |
| 209 | 6503  | 1041 | 5569  | 1337 | 206 | 7706  | 1163 | 6532  | 1451 | 207 | 5721  | 799  | 5245  | 1203 | 213 | 7476  | 902  | 8768  | 1671 | 204 | 6286  | 118 | 6594  | 318  | 205 | 5799  | 475 | 7116  | 678  | 208 | 7833  | 599  |
| 204 | 4485  | 660  | 4603  | 1030 | 211 | 3501  | 829  | 3271  | 1386 | 210 | 5123  | 990  | 5948  | 1320 | 208 | 3383  | 2026 | 3612  | 5898 | 211 | 1308  | 85  | 1638  | 226  | 203 | 1503  | 442 | 1158  | 840  | 209 | 2909  | 680  |
| 207 | 3669  | 1181 | 2624  | 1778 | 205 | 2418  | 675  | 2118  | 1137 | 204 | 2809  | 916  | 2236  | 1276 | 206 | 1996  | 1014 | 3906  | 2603 | 208 | 931   | 316 | 1044  | 709  | 207 | 1807  | 639 | 1460  | 1165 | 209 | 1924  | 589  |
| 205 | 2966  | 1034 | 1913  | 1555 | 209 | 2335  | 878  | 2058  | 1365 | 211 | 2924  | 1081 | 1978  | 1504 | 203 | 3230  | 1972 | 3415  | 5411 | 204 | 612   | 217 | 659   | 588  | 207 | 1306  | 479 | 1198  | 902  | 209 | 1938  | 779  |
| 195 | 8144  | 878  | 8710  | 1295 | 208 | 3789  | 1029 | 3480  | 1490 | 208 | 4067  | 1079 | 3123  | 1349 | 209 | 2457  | 1321 | 4973  | 3169 | 209 | 737   | 426 | 899   | 1059 | 198 | 1320  | 663 | 1372  | 1224 | 208 | 1352  | 601  |
| 207 | 7214  | 834  | 6382  | 869  | 208 | 5800  | 1359 | 4476  | 2180 | 201 | 2337  | 792  | 1875  | 1111 | 210 | 3108  | 1368 | 5479  | 3109 | 203 | 689   | 209 | 796   | 507  | 204 | 1608  | 638 | 1072  | 936  | 202 | 2217  | 800  |
| 208 | 18937 | 768  | 15990 | 1149 | 207 | 14715 | 671  | 13414 | 926  | 211 | 25075 | 855  | 24244 | 1143 | 210 | 13326 | 785  | 17793 | 1592 | 207 | 10874 | 129 | 14161 | 392  | 200 | 12580 | 612 | 18106 | 1198 | 207 | 12666 | 827  |
| 210 | 2434  | 795  | 1423  | 932  | 206 | 2223  | 934  | 1336  | 1442 | 204 | 2540  | 753  | 1655  | 1048 | 203 | 1680  | 479  | 3442  | 818  | 204 | 832   | 240 | 835   | 523  | 211 | 1149  | 626 | 1176  | 1071 | 204 | 3370  | 1218 |
| 206 | 2746  | 871  | 1744  | 1043 | 208 | 2286  | 1079 | 1465  | 1987 | 209 | 2205  | 635  | 1900  | 1210 | 210 | 1423  | 553  | 1759  | 1077 | 209 | 676   | 199 | 782   | 483  | 201 | 1335  | 480 | 955   | 776  | 206 | 2022  | 625  |
| 205 | 2368  | 684  | 1864  | 1142 | 209 | 1611  | 422  | 1609  | 804  | 213 | 1422  | 828  | 1415  | 1689 | 210 | 1117  | 739  | 1013  | 1452 | 208 | 643   | 166 | 684   | 434  | 206 | 1527  | 758 | 1271  | 1281 | 206 | 1595  | 611  |
| 204 | 2752  | 923  | 2028  | 1281 | 206 | 1631  | 588  | 1537  | 880  | 210 | 2757  | 1141 | 1832  | 1706 | 207 | 1160  | 580  | 1539  | 1326 | 209 | 755   | 193 | 948   | 435  | 206 | 1150  | 402 | 1457  | 919  | 209 | 2232  | 612  |
| 207 | 2431  | 605  | 2060  | 840  | 210 | 1783  | 639  | 1288  | 1060 | 207 | 3257  | 689  | 2920  | 1099 | 207 | 2060  | 294  | 2406  | 455  | 205 | 896   | 237 | 992   | 483  | 201 | 1401  | 561 | 1314  | 922  | 207 | 1828  | 391  |
| 208 | 3961  | 740  | 3414  | 1145 | 208 | 2272  | 647  | 2129  | 1222 | 212 | 2581  | 870  | 1693  | 1203 | 209 | 2083  | 496  | 2409  | 897  | 206 | 786   | 467 | 1181  | 1278 | 202 | 1542  | 642 | 1246  | 1096 | 209 | 1839  | 368  |
| 208 | 2399  | 781  | 2662  | 1270 | 211 | 1673  | 457  | 1767  | 846  | 211 | 1782  | 807  | 1705  | 1365 | 212 | 1927  | 697  | 1693  | 1098 | 209 | 592   | 158 | 636   | 424  | 206 | 1207  | 469 | 1223  | 902  | 210 | 1583  | 449  |
| 207 | 1537  | 383  | 1555  | 798  | 211 | 1288  | 428  | 1061  | 718  | 207 | 1460  | 637  | 1682  | 1432 | 212 | 5803  | 957  | 13034 | 1508 | 206 | 795   | 182 | 954   | 492  | 195 | 1442  | 524 | 3525  | 1073 | 209 | 1737  | 624  |
| 207 | 2223  | 696  | 1534  | 898  | 206 | 2133  | 734  | 1562  | 1349 | 205 | 1664  | 520  | 1838  | 971  | 210 | 2585  | 506  | 3672  | 1021 | 212 | 959   | 160 | 2896  | 406  | 205 | 1183  | 552 | 954   | 995  | 202 | 2159  | 1097 |
| 210 | 2326  | 795  | 1665  | 1011 | 206 | 1818  | 567  | 1543  | 892  | 208 | 2305  | 734  | 2153  | 1238 | 210 | 1685  | 712  | 3109  | 2180 | 206 | 822   | 289 | 1132  | 786  | 206 | 1212  | 477 | 1157  | 809  | 209 | 1846  | 917  |
| 209 | 2713  | 798  | 1815  | 1061 | 208 | 1609  | 539  | 1394  | 960  | 210 | 1799  | 794  | 1471  | 1606 | 206 | 2334  | 809  | 5329  | 2386 | 202 | 634   | 427 | 742   | 995  | 207 | 1115  | 537 | 1202  | 1069 | 209 | 1648  | 647  |
| 206 | 2801  | 742  | 1536  | 1063 | 210 | 1588  | 496  | 1500  | 839  | 209 | 2073  | 919  | 1630  | 1467 | 209 | 1613  | 603  | 2183  | 982  | 206 | 899   | 220 | 1034  | 719  | 202 | 1147  | 391 | 1395  | 705  | 211 | 1663  | 646  |
| 204 | 10049 | 1510 | 12787 | 2679 | 201 | 6414  | 954  | 6555  | 1401 | 208 | 3223  | 710  | 2548  | 1090 | 207 | 3959  | 573  | 4981  | 973  | 205 | 3483  | 129 | 4623  | 333  | 204 | 2984  | 602 | 3557  | 1034 | 212 | 3281  | 690  |
| 208 | 12000 | 1209 | 10165 | 2451 | 207 | 13121 | 820  | 10339 | 1182 | 207 | 23722 | 998  | 21164 | 1459 | 205 | 15095 | 561  | 21407 | 1105 | 206 | 15095 | 97  | 17277 | 267  | 206 | 10682 | 543 | 12269 | 912  | 210 | 14585 | 915  |
| 210 | 4205  | 1143 | 3536  | 1991 | 209 | 2788  | 642  | 2047  | 1321 | 209 | 3867  | 504  | 3741  | 663  | 208 | 4407  | 436  | 5666  | 888  | 209 | 1589  | 240 | 1812  | 507  | 200 | 2162  | 801 | 1779  | 872  | 209 | 2621  | 815  |
| 209 | 5354  | 703  | 5488  | 977  | 207 | 3708  | 1122 | 2995  | 1759 | 208 | 3985  | 553  | 3771  | 779  | 209 | 6691  | 426  | 8555  | 788  | 208 | 2694  | 198 | 3056  | 434  | 205 | 2868  | 289 | 3690  | 602  | 211 | 3492  | 609  |
| 205 | 3205  | 918  | 3324  | 1454 | 207 | 2040  | 602  |       |      |     |       |      |       |      |     |       |      |       |      |     |       |     |       |      |     |       |     |       |      |     |       |      |

|     |      |      |      |      |     |      |      |       |      |     |      |      |      |      |     |      |      |      |      |     |      |     |      |      |     |      |     |      |      |     |      |      |
|-----|------|------|------|------|-----|------|------|-------|------|-----|------|------|------|------|-----|------|------|------|------|-----|------|-----|------|------|-----|------|-----|------|------|-----|------|------|
| 212 | 2122 | 818  | 1743 | 1376 | 210 | 2331 | 700  | 1763  | 1184 | 207 | 2866 | 1038 | 1885 | 1603 | 202 | 3543 | 961  | 6767 | 1660 | 207 | 874  | 249 | 1225 | 632  | 204 | 1223 | 483 | 1224 | 931  | 208 | 2073 | 544  |
| 207 | 4019 | 938  | 3085 | 1204 | 200 | 1983 | 603  | 1744  | 987  | 209 | 4281 | 838  | 3601 | 1322 | 207 | 2457 | 569  | 3195 | 1187 | 210 | 1299 | 354 | 1514 | 633  | 197 | 1377 | 476 | 1477 | 940  | 210 | 2303 | 650  |
| 208 | 3275 | 703  | 3105 | 1091 | 209 | 2122 | 690  | 1856  | 993  | 207 | 2507 | 861  | 1334 | 1022 | 208 | 1978 | 840  | 1704 | 1552 | 202 | 795  | 262 | 924  | 536  | 205 | 1014 | 257 | 1127 | 542  | 209 | 1883 | 597  |
| 210 | 4291 | 671  | 4205 | 1319 | 211 | 3231 | 572  | 3221  | 1080 | 211 | 3929 | 534  | 3236 | 811  | 207 | 6253 | 521  | 3927 | 591  | 209 | 2671 | 232 | 3927 | 591  | 209 | 3484 | 341 | 4722 | 759  | 210 | 4507 | 498  |
| 207 | 1905 | 681  | 1601 | 1421 | 210 | 3136 | 902  | 2483  | 1293 | 204 | 2771 | 771  | 2749 | 1060 | 204 | 1532 | 632  | 4128 | 1405 | 207 | 820  | 303 | 1192 | 641  | 207 | 1257 | 451 | 1246 | 841  | 210 | 2071 | 995  |
| 204 | 2705 | 900  | 2011 | 1229 | 204 | 1799 | 443  | 1827  | 760  | 214 | 4150 | 359  | 3458 | 3166 | 202 | 2028 | 666  | 2568 | 1416 | 209 | 1135 | 393 | 1400 | 1013 | 204 | 1844 | 411 | 1960 | 373  | 208 | 2885 | 946  |
| 209 | 2219 | 808  | 1382 | 1183 | 206 | 1706 | 566  | 1321  | 858  | 210 | 1868 | 757  | 1588 | 1420 | 211 | 2213 | 662  | 4086 | 1352 | 210 | 846  | 282 | 1309 | 624  | 211 | 1154 | 565 | 1164 | 1576 | 213 | 2247 | 935  |
| 210 | 1508 | 659  | 1678 | 1065 | 210 | 2071 | 738  | 1436  | 1359 | 204 | 1855 | 534  | 1466 | 941  | 208 | 1525 | 642  | 2251 | 1113 | 209 | 1037 | 190 | 2217 | 486  | 201 | 990  | 422 | 1016 | 793  | 209 | 1689 | 483  |
| 205 | 2248 | 969  | 1610 | 1382 | 211 | 2633 | 962  | 1460  | 1389 | 206 | 1427 | 439  | 1449 | 806  | 212 | 1518 | 601  | 2975 | 1191 | 210 | 818  | 231 | 1147 | 576  | 206 | 1052 | 464 | 1029 | 734  | 208 | 1436 | 510  |
| 203 | 2244 | 880  | 1664 | 1348 | 210 | 2286 | 613  | 1555  | 886  | 204 | 1830 | 562  | 1885 | 1383 | 211 | 1846 | 1047 | 2012 | 2083 | 209 | 882  | 140 | 1207 | 465  | 205 | 1635 | 466 | 1090 | 909  | 208 | 2258 | 818  |
| 206 | 2163 | 766  | 1668 | 1047 | 210 | 1511 | 502  | 1398  | 843  | 211 | 2239 | 756  | 1549 | 1146 | 205 | 1355 | 655  | 1514 | 1388 | 208 | 718  | 276 | 977  | 610  | 207 | 1191 | 393 | 1171 | 722  | 208 | 1345 | 436  |
| 202 | 2680 | 736  | 1887 | 1084 | 209 | 1465 | 432  | 1478  | 736  | 211 | 2089 | 874  | 2572 | 1306 | 211 | 1607 | 653  | 2084 | 1152 | 212 | 739  | 236 | 976  | 561  | 207 | 1012 | 532 | 1104 | 1026 | 210 | 1448 | 329  |
| 207 | 2820 | 1021 | 1833 | 1368 | 211 | 2072 | 436  | 1883  | 775  | 211 | 2658 | 680  | 1708 | 1279 | 209 | 1836 | 349  | 4119 | 749  | 209 | 1007 | 388 | 1752 | 656  | 206 | 1161 | 409 | 1130 | 798  | 210 | 1982 | 409  |
| 209 | 2827 | 718  | 2842 | 1240 | 212 | 1758 | 706  | 1578  | 1156 | 210 | 2770 | 736  | 1887 | 1081 | 208 | 1679 | 639  | 2191 | 1073 | 207 | 944  | 301 | 1992 | 535  | 204 | 1135 | 470 | 1230 | 943  | 206 | 1948 | 642  |
| 210 | 3315 | 797  | 3047 | 1264 | 210 | 3363 | 920  | 2110  | 1008 | 204 | 2644 | 815  | 2178 | 1217 | 207 | 1951 | 556  | 2804 | 938  | 209 | 704  | 367 | 709  | 758  | 208 | 1249 | 491 | 1138 | 843  | 206 | 2029 | 728  |
| 208 | 4615 | 825  | 3622 | 1156 | 209 | 3296 | 763  | 3364  | 1397 | 211 | 3267 | 934  | 2090 | 1390 | 206 | 1783 | 365  | 2138 | 748  | 212 | 1985 | 296 | 3049 | 635  | 209 | 1427 | 461 | 1275 | 717  | 204 | 3148 | 718  |
| 209 | 3731 | 871  | 2806 | 1201 | 207 | 2887 | 616  | 3144  | 1012 | 209 | 2314 | 572  | 2044 | 959  | 210 | 1390 | 525  | 2430 | 983  | 210 | 1054 | 226 | 1299 | 552  | 207 | 1383 | 544 | 1456 | 953  | 214 | 1697 | 341  |
| 213 | 1692 | 726  | 1518 | 1269 | 209 | 2849 | 498  | 3033  | 796  | 211 | 1503 | 544  | 1330 | 1112 | 208 | 1085 | 460  | 4144 | 798  | 212 | 637  | 162 | 663  | 389  | 204 | 1185 | 456 | 1316 | 941  | 206 | 2005 | 667  |
| 209 | 3307 | 927  | 2718 | 1376 | 208 | 3071 | 656  | 2916  | 982  | 205 | 2192 | 537  | 2137 | 1113 | 212 | 2698 | 421  | 1187 | 912  | 211 | 1166 | 135 | 1412 | 391  | 207 | 2134 | 927 | 1949 | 2043 | 202 | 2275 | 667  |
| 207 | 2599 | 910  | 1435 | 1173 | 197 | 1848 | 554  | 1588  | 837  | 207 | 1588 | 582  | 1755 | 1345 | 210 | 1913 | 444  | 5810 | 1095 | 208 | 766  | 199 | 1033 | 461  | 206 | 1740 | 604 | 1071 | 904  | 204 | 2292 | 807  |
| 209 | 2297 | 912  | 1335 | 1414 | 205 | 2176 | 819  | 1407  | 1134 | 203 | 2250 | 1036 | 1654 | 1633 | 204 | 1636 | 478  | 3317 | 1024 | 210 | 876  | 176 | 1524 | 479  | 206 | 1496 | 498 | 1246 | 706  | 204 | 2956 | 995  |
| 207 | 2271 | 800  | 1298 | 1130 | 202 | 1645 | 480  | 1458  | 786  | 210 | 2831 | 1219 | 1585 | 1503 | 201 | 1467 | 660  | 1379 | 1259 | 205 | 685  | 141 | 789  | 388  | 206 | 1253 | 563 | 1147 | 961  | 210 | 1698 | 632  |
| 205 | 2701 | 787  | 2820 | 1202 | 207 | 2360 | 704  | 1896  | 1000 | 211 | 2296 | 952  | 1918 | 1568 | 205 | 2461 | 529  | 3659 | 1109 | 209 | 1023 | 328 | 1102 | 742  | 205 | 1673 | 524 | 1567 | 818  | 208 | 2272 | 714  |
| 209 | 5149 | 1122 | 3306 | 1156 | 199 | 2863 | 669  | 2563  | 1151 | 210 | 3240 | 573  | 2754 | 1053 | 207 | 6862 | 645  | 9567 | 1032 | 203 | 4032 | 492 | 4576 | 943  | 206 | 1012 | 637 | 3336 | 939  | 205 | 4426 | 1004 |
| 205 | 2003 | 706  | 1974 | 1203 | 206 | 2467 | 880  | 1887  | 1391 | 205 | 2236 | 883  | 1578 | 1490 | 209 | 1449 | 491  | 1725 | 871  | 206 | 694  | 270 | 1125 | 592  | 207 | 1171 | 530 | 1033 | 1232 | 205 | 1962 | 633  |
| 207 | 2938 | 884  | 1930 | 1238 | 199 | 2036 | 875  | 1317  | 1204 | 206 | 1921 | 819  | 1400 | 1320 | 207 | 1208 | 715  | 1277 | 1646 | 204 | 831  | 264 | 1115 | 719  | 206 | 1242 | 495 | 1081 | 883  | 207 | 2173 | 810  |
| 207 | 2678 | 507  | 2911 | 1138 | 210 | 1719 | 523  | 1606  | 696  | 207 | 1210 | 762  | 1580 | 1201 | 206 | 1714 | 1047 | 1879 | 2091 | 199 | 661  | 178 | 732  | 351  | 199 | 1043 | 498 | 1091 | 979  | 207 | 1615 | 560  |
| 208 | 3136 | 889  | 2465 | 1155 | 208 | 2652 | 1001 | 1845  | 1545 | 199 | 1571 | 344  | 1394 | 523  | 210 | 1546 | 477  | 1599 | 1189 | 207 | 758  | 237 | 927  | 449  | 207 | 1057 | 422 | 1149 | 869  | 210 | 2337 | 728  |
| 204 | 2462 | 1116 | 1554 | 1457 | 207 | 7919 | 1281 | 13776 | 1947 | 199 | 1830 | 824  | 1456 | 1569 | 209 | 2034 | 747  | 4222 | 1347 | 209 | 671  | 187 | 962  | 494  | 208 | 1340 | 595 | 1085 | 1022 | 208 | 1727 | 620  |
| 203 | 1997 | 636  | 1650 | 926  | 207 | 1312 | 604  | 1437  | 1151 | 210 | 2486 | 1365 | 2109 | 2233 | 208 | 1647 | 775  | 2986 | 1699 | 209 | 817  | 138 | 820  | 406  | 208 | 1311 | 138 | 820  | 406  | 208 | 2029 | 1050 |
| 204 | 2207 | 857  | 1413 | 1247 | 208 | 1610 | 690  | 1378  | 1104 | 209 | 2046 | 807  | 1454 | 1478 | 208 | 1764 | 702  | 2601 | 1069 | 208 | 655  | 165 | 693  | 361  | 204 | 1078 | 643 | 976  | 1141 | 210 | 1862 | 549  |
| 205 | 2015 | 769  | 1525 | 1244 | 208 | 2113 | 837  | 1424  | 1391 | 208 | 2219 | 891  | 1436 | 1351 | 211 | 1771 | 499  | 2308 | 791  | 206 | 757  | 240 | 962  | 560  | 205 | 1027 | 406 | 1123 | 716  | 209 | 1913 | 517  |
| 204 | 2415 | 801  | 2114 | 1147 | 207 | 1816 | 550  | 1400  | 1068 | 207 | 1897 | 673  | 1363 | 1005 | 209 | 1904 | 338  | 4122 | 766  | 207 | 1684 | 270 | 4599 | 573  | 206 | 1216 | 429 | 1176 | 710  | 210 | 1523 | 442  |
| 203 | 2305 | 639  | 1763 | 814  | 208 | 2157 | 722  | 1650  | 1134 | 208 | 1634 | 474  | 1520 | 863  | 211 | 1467 | 556  | 1954 | 1563 | 211 | 697  | 170 | 825  | 402  | 204 | 1185 | 389 | 1069 | 654  | 207 | 2035 | 722  |
| 199 | 2156 | 650  | 1342 | 953  | 205 | 1668 | 1034 | 1488  | 1719 | 210 | 2241 | 638  | 1737 | 909  | 210 | 1158 | 414  | 1557 | 945  | 207 | 701  | 260 | 832  | 579  | 207 | 710  | 319 | 1283 | 672  | 209 | 1920 | 633  |
| 210 | 2147 | 726  | 1917 | 1150 | 207 | 1736 | 524  | 1666  | 855  | 210 | 3027 | 966  | 4652 | 1377 | 201 | 1378 | 781  | 1201 | 1325 | 207 | 689  | 245 | 904  | 495  | 203 | 1284 | 414 | 1498 | 840  | 206 | 1563 | 829  |
| 212 | 6024 | 954  | 4766 | 1145 | 211 | 4955 | 558  | 4389  | 999  | 212 | 3706 | 740  | 2904 | 1263 | 208 | 6324 | 439  | 8568 | 1115 | 208 | 2634 | 276 | 3241 | 515  | 210 | 1153 | 626 | 4657 | 1148 | 207 | 6256 | 820  |
| 197 | 2869 | 886  | 1916 | 1224 | 207 | 2098 | 623  | 1760  | 1088 | 208 | 2689 | 749  | 2167 | 1226 | 208 | 2059 | 790  | 1517 | 1428 | 202 | 782  | 181 | 832  | 387  | 202 | 1290 | 521 | 1356 | 945  | 209 | 1910 | 594  |
| 209 | 2729 | 1094 | 1583 | 1619 | 204 | 1897 | 536  | 1863  | 910  | 209 | 1838 | 630  | 1480 | 1104 | 209 | 1175 | 547  | 1349 | 1355 | 207 | 752  | 231 | 909  | 579  | 207 | 1312 | 506 | 1398 | 937  | 209 | 1994 | 764  |
| 208 | 3107 | 1088 | 3115 | 2102 | 210 | 3171 | 930  | 2679  | 1285 | 205 | 3338 | 814  | 2449 | 1077 | 206 | 2438 | 349  | 3180 | 723  | 212 | 1394 | 194 | 1881 | 469  | 204 | 1513 | 424 | 1484 | 811  | 209 | 1925 | 753  |
| 209 | 3900 | 1088 | 2334 | 1396 | 204 | 2753 | 508  | 2949  | 800  | 207 | 2035 | 514  | 2082 | 983  | 208 | 1971 | 264  | 2582 | 1056 | 211 | 949  | 351 | 1206 | 832  | 206 | 1770 | 548 | 1527 | 801  | 205 | 2628 | 882  |
| 206 | 2261 | 731  | 1999 | 1198 | 210 | 3874 | 845  | 4011  | 1343 | 206 | 2671 | 430  | 2775 | 845  | 214 | 1405 | 507  | 1678 | 1240 | 210 | 836  | 380 | 871  | 1234 | 206 | 1831 | 702 | 1345 | 1090 | 203 | 2943 | 765  |
| 202 | 2421 | 455  | 2511 | 837  | 207 | 1775 | 480  | 1470  | 819  | 205 | 2343 | 691  | 1022 | 958  | 208 | 1672 | 483  | 2789 | 921  | 209 | 781  | 348 | 1123 | 690  | 203 | 1414 | 626 | 1169 | 1132 | 203 | 2169 | 652  |
| 209 | 2414 | 622  | 1755 | 888  | 202 | 1712 | 517  | 1650  | 838  | 209 | 2838 | 1125 | 16   |      |     |      |      |      |      |     |      |     |      |      |     |      |     |      |      |     |      |      |



|     |       |      |       |      |     |       |      |       |      |     |       |      |       |      |     |       |      |       |      |     |       |      |       |      |     |      |     |       |      |     |       |      |
|-----|-------|------|-------|------|-----|-------|------|-------|------|-----|-------|------|-------|------|-----|-------|------|-------|------|-----|-------|------|-------|------|-----|------|-----|-------|------|-----|-------|------|
| 206 | 3283  | 1020 | 2505  | 1552 | 208 | 2742  | 964  | 1638  | 1320 | 211 | 2751  | 712  | 2193  | 1078 | 204 | 1710  | 478  | 2551  | 925  | 207 | 1041  | 459  | 1741  | 1434 | 207 | 1423 | 520 | 1302  | 929  | 203 | 1485  | 595  |
| 202 | 5135  | 1465 | 3812  | 1973 | 202 | 3671  | 606  | 2754  | 837  | 212 | 3628  | 899  | 2842  | 1399 | 208 | 5761  | 446  | 6729  | 921  | 205 | 2254  | 186  | 2889  | 378  | 205 | 2617 | 594 | 2578  | 1059 | 206 | 3482  | 858  |
| 207 | 2518  | 1099 | 1665  | 1751 | 206 | 7589  | 721  | 16767 | 990  | 209 | 2246  | 769  | 1809  | 1375 | 210 | 1802  | 447  | 2951  | 887  | 209 | 840   | 294  | 991   | 610  | 205 | 1115 | 411 | 1139  | 952  | 205 | 2121  | 723  |
| 207 | 1848  | 558  | 2207  | 1269 | 209 | 2204  | 680  | 1413  | 887  | 205 | 2469  | 817  | 1967  | 1187 | 212 | 1568  | 449  | 3461  | 885  | 208 | 756   | 274  | 1169  | 705  | 203 | 1038 | 386 | 1078  | 763  | 212 | 2683  | 995  |
| 205 | 2510  | 906  | 1684  | 1219 | 202 | 1565  | 561  | 1434  | 990  | 209 | 3163  | 1160 | 2208  | 1912 | 210 | 1243  | 632  | 1422  | 1851 | 207 | 774   | 337  | 825   | 813  | 206 | 2373 | 869 | 1013  | 1098 | 198 | 2296  | 1102 |
| 206 | 2598  | 1131 | 1447  | 1626 | 205 | 1619  | 726  | 1243  | 1269 | 208 | 2034  | 819  | 1736  | 1422 | 208 | 1630  | 394  | 1191  | 578  | 203 | 702   | 251  | 731   | 632  | 206 | 1321 | 536 | 1048  | 902  | 210 | 2518  | 663  |
| 210 | 3276  | 1725 | 1097  | 3210 | 190 | 1365  | 570  | 1289  | 1155 | 210 | 1567  | 651  | 1552  | 1370 | 210 | 2024  | 674  | 2740  | 1247 | 205 | 655   | 180  | 696   | 378  | 206 | 930  | 303 | 868   | 534  | 209 | 2415  | 938  |
| 207 | 2720  | 1204 | 1575  | 1445 | 206 | 1618  | 515  | 1382  | 1067 | 213 | 2556  | 947  | 1727  | 1419 | 210 | 2384  | 996  | 2270  | 1593 | 205 | 885   | 315  | 1421  | 567  | 201 | 1299 | 400 | 1081  | 595  | 202 | 1852  | 1425 |
| 206 | 2073  | 769  | 1833  | 1212 | 212 | 1801  | 799  | 1342  | 1331 | 210 | 1885  | 542  | 1977  | 994  | 209 | 1389  | 411  | 2238  | 815  | 208 | 651   | 157  | 759   | 326  | 206 | 998  | 255 | 1289  | 458  | 207 | 1523  | 952  |
| 203 | 3405  | 767  | 2801  | 1135 | 205 | 2219  | 804  | 2239  | 1655 | 211 | 1981  | 720  | 1793  | 1114 | 211 | 2032  | 1051 | 5450  | 3069 | 206 | 788   | 306  | 1056  | 868  | 205 | 1088 | 716 | 1331  | 1479 | 211 | 1816  | 500  |
| 208 | 3094  | 1237 | 2066  | 1675 | 207 | 2761  | 901  | 4894  | 1620 | 207 | 7643  | 1284 | 8825  | 2163 | 208 | 1873  | 658  | 5181  | 1111 | 210 | 681   | 181  | 774   | 368  | 204 | 1369 | 422 | 1253  | 695  | 209 | 2186  | 851  |
| 206 | 4006  | 1015 | 3287  | 1637 | 207 | 2310  | 627  | 1541  | 860  | 210 | 2597  | 767  | 2126  | 1221 | 212 | 3977  | 1019 | 9613  | 2611 | 208 | 610   | 189  | 722   | 482  | 211 | 976  | 323 | 1012  | 681  | 210 | 2599  | 1371 |
| 208 | 3533  | 732  | 2451  | 883  | 201 | 3161  | 1127 | 2395  | 1955 | 209 | 2537  | 941  | 1877  | 1260 | 208 | 3644  | 1239 | 4373  | 2806 | 193 | 729   | 249  | 783   | 507  | 209 | 2756 | 378 | 8816  | 685  | 213 | 2103  | 825  |
| 184 | 3535  | 1065 | 2380  | 1395 | 200 | 3083  | 1636 | 2531  | 3092 | 210 | 1593  | 500  | 1524  | 865  | 213 | 2096  | 745  | 4494  | 1419 | 209 | 670   | 216  | 1371  | 417  | 202 | 1551 | 595 | 1435  | 898  | 210 | 1855  | 768  |
| 205 | 6605  | 1146 | 4843  | 1561 | 204 | 5146  | 1230 | 4590  | 1926 | 209 | 6901  | 638  | 7239  | 878  | 209 | 6175  | 536  | 8020  | 1145 | 208 | 3622  | 320  | 3893  | 810  | 204 | 4601 | 437 | 5221  | 694  | 210 | 4770  | 949  |
| 204 | 4193  | 897  | 3169  | 1368 | 206 | 3427  | 932  | 2350  | 1453 | 206 | 4076  | 823  | 3261  | 1035 | 203 | 2349  | 382  | 4417  | 746  | 212 | 1211  | 396  | 1289  | 979  | 207 | 1130 | 511 | 878   | 816  | 204 | 1918  | 579  |
| 204 | 3454  | 975  | 2959  | 1378 | 205 | 2664  | 1100 | 1957  | 1842 | 202 | 2503  | 753  | 1984  | 1028 | 208 | 1665  | 603  | 2162  | 1104 | 208 | 737   | 336  | 925   | 771  | 204 | 1980 | 893 | 1091  | 1049 | 204 | 1581  | 775  |
| 211 | 2652  | 808  | 1947  | 1348 | 210 | 2077  | 719  | 1320  | 974  | 207 | 3034  | 634  | 2713  | 850  | 210 | 1414  | 682  | 1504  | 1391 | 210 | 774   | 74   | 907   | 210  | 207 | 1409 | 552 | 1370  | 1028 | 204 | 1956  | 684  |
| 204 | 4435  | 955  | 3470  | 1278 | 203 | 3866  | 1166 | 3302  | 1489 | 206 | 4288  | 1175 | 3221  | 1658 | 205 | 2049  | 593  | 2850  | 945  | 209 | 770   | 146  | 884   | 474  | 204 | 951  | 420 | 897   | 775  | 212 | 1619  | 780  |
| 207 | 4592  | 1318 | 2980  | 1793 | 203 | 4030  | 778  | 4463  | 1416 | 209 | 4002  | 871  | 4033  | 1807 | 209 | 2333  | 673  | 2545  | 1228 | 198 | 706   | 146  | 860   | 379  | 207 | 849  | 355 | 958   | 703  | 206 | 2376  | 769  |
| 209 | 12680 | 1117 | 10622 | 1882 | 209 | 17086 | 689  | 16763 | 1060 | 210 | 17060 | 1044 | 16260 | 1758 | 207 | 14888 | 854  | 16280 | 1253 | 204 | 9032  | 269  | 9572  | 573  | 206 | 8127 | 468 | 11715 | 860  | 208 | 12097 | 694  |
| 211 | 4962  | 945  | 4721  | 1202 | 206 | 1509  | 620  | 1272  | 1097 | 209 | 2004  | 430  | 1860  | 898  | 213 | 1915  | 712  | 1847  | 1095 | 210 | 728   | 176  | 793   | 383  | 208 | 1488 | 596 | 1263  | 1034 | 205 | 2251  | 842  |
| 209 | 4387  | 1131 | 3739  | 1555 | 210 | 2650  | 911  | 1588  | 1213 | 194 | 1869  | 715  | 1673  | 1559 | 211 | 1845  | 638  | 2211  | 1403 | 209 | 753   | 174  | 913   | 455  | 205 | 1075 | 417 | 1113  | 783  | 207 | 1670  | 587  |
| 209 | 4647  | 1560 | 3130  | 2566 | 209 | 2559  | 778  | 1835  | 907  | 208 | 1459  | 563  | 1457  | 1190 | 213 | 2082  | 584  | 3384  | 883  | 207 | 736   | 334  | 797   | 659  | 204 | 944  | 222 | 1167  | 469  | 210 | 1652  | 518  |
| 209 | 3691  | 1282 | 3016  | 1961 | 208 | 3127  | 1222 | 1337  | 1281 | 203 | 2181  | 950  | 1151  | 1179 | 207 | 1432  | 647  | 1992  | 1038 | 201 | 840   | 535  | 941   | 1437 | 200 | 1529 | 462 | 1530  | 781  | 205 | 1723  | 387  |
| 211 | 2850  | 1570 | 1847  | 2393 | 199 | 2348  | 741  | 1558  | 981  | 204 | 2526  | 518  | 2462  | 745  | 208 | 1174  | 584  | 1333  | 1197 | 203 | 676   | 199  | 791   | 471  | 207 | 1210 | 550 | 1088  | 1127 | 206 | 1653  | 1038 |
| 203 | 3140  | 1159 | 2565  | 2477 | 212 | 3231  | 639  | 3175  | 1000 | 210 | 2447  | 542  | 2237  | 833  | 209 | 1200  | 360  | 1310  | 759  | 208 | 794   | 242  | 903   | 441  | 206 | 1207 | 586 | 1295  | 1187 | 208 | 2688  | 1048 |
| 208 | 2477  | 881  | 2333  | 1433 | 206 | 2677  | 909  | 1469  | 1111 | 195 | 1815  | 606  | 1883  | 1003 | 207 | 1756  | 626  | 2957  | 1025 | 207 | 627   | 275  | 813   | 667  | 204 | 984  | 357 | 926   | 578  | 209 | 2147  | 604  |
| 200 | 2301  | 776  | 1547  | 1126 | 208 | 1933  | 750  | 1508  | 1251 | 209 | 2168  | 708  | 1679  | 1275 | 206 | 1626  | 569  | 1682  | 983  | 205 | 633   | 210  | 784   | 526  | 204 | 1708 | 535 | 3125  | 842  | 209 | 1859  | 677  |
| 212 | 2004  | 698  | 1428  | 1063 | 208 | 2040  | 765  | 1303  | 1011 | 204 | 2714  | 935  | 1342  | 1171 | 203 | 1640  | 530  | 1438  | 840  | 209 | 590   | 270  | 674   | 592  | 205 | 1076 | 410 | 973   | 828  | 209 | 1941  | 729  |
| 203 | 2037  | 730  | 1445  | 1063 | 208 | 1529  | 612  | 1239  | 1057 | 206 | 2408  | 848  | 1956  | 1341 | 210 | 2361  | 844  | 2333  | 1068 | 198 | 5097  | 1398 | 15550 | 8450 | 208 | 939  | 310 | 1064  | 560  | 207 | 1691  | 848  |
| 207 | 2142  | 822  | 1737  | 1215 | 210 | 1535  | 573  | 1446  | 1014 | 209 | 1810  | 897  | 1630  | 1434 | 207 | 1646  | 621  | 2216  | 1099 | 211 | 726   | 106  | 808   | 341  | 206 | 1429 | 467 | 1175  | 805  | 205 | 2298  | 1271 |
| 192 | 2506  | 796  | 1800  | 1380 | 210 | 2567  | 1036 | 1413  | 1433 | 205 | 2041  | 780  | 1736  | 1189 | 211 | 2292  | 589  | 4098  | 1147 | 206 | 702   | 127  | 702   | 353  | 205 | 895  | 430 | 965   | 880  | 209 | 2288  | 1205 |
| 207 | 4872  | 905  | 4205  | 1151 | 205 | 4702  | 1005 | 3550  | 1321 | 202 | 3643  | 902  | 3024  | 1578 | 210 | 4188  | 1149 | 4469  | 3245 | 208 | 3186  | 298  | 3381  | 844  | 208 | 9110 | 440 | 2361  | 1009 | 210 | 12610 | 617  |
| 208 | 11688 | 1290 | 10288 | 1774 | 208 | 16025 | 1373 | 12826 | 1592 | 207 | 17759 | 1332 | 17900 | 2321 | 209 | 19301 | 1120 | 20074 | 2165 | 209 | 14777 | 263  | 16009 | 505  | 206 | 1910 | 376 | 10650 | 669  | 210 | 3546  | 674  |
| 206 | 5315  | 1246 | 4010  | 1758 | 203 | 4361  | 1282 | 3888  | 3106 | 208 | 3012  | 769  | 2175  | 1188 | 207 | 4677  | 724  | 4225  | 987  | 205 | 1393  | 273  | 1409  | 748  | 209 | 1667 | 587 | 1722  | 1319 | 212 | 2423  | 788  |
| 205 | 4405  | 582  | 4193  | 1063 | 211 | 4832  | 1291 | 3390  | 1778 | 205 | 5709  | 875  | 5729  | 1445 | 205 | 6389  | 795  | 8558  | 1942 | 208 | 2445  | 145  | 2417  | 327  | 202 | 5040 | 507 | 3182  | 931  | 211 | 3358  | 726  |
| 205 | 4122  | 859  | 3447  | 1192 | 204 | 3321  | 1041 | 2743  | 1927 | 208 | 1461  | 524  | 1544  | 960  | 214 | 1316  | 578  | 2105  | 1111 | 208 | 725   | 117  | 774   | 283  | 202 | 1036 | 592 | 950   | 920  | 202 | 2143  | 810  |
| 208 | 3197  | 778  | 2735  | 1251 | 205 | 2773  | 631  | 2256  | 1063 | 209 | 2430  | 923  | 1474  | 1207 | 210 | 1199  | 439  | 1531  | 1200 | 207 | 794   | 147  | 974   | 347  | 210 | 1333 | 661 | 1112  | 1219 | 209 | 2479  | 1138 |
| 205 | 2727  | 846  | 1874  | 1210 | 205 | 2295  | 616  | 1643  | 1049 | 206 | 2852  | 809  | 2284  | 1030 | 203 | 1902  | 391  | 4305  | 1209 | 207 | 668   | 219  | 737   | 434  | 210 | 1065 | 270 | 1084  | 454  | 209 | 1921  | 649  |
| 207 | 1927  | 709  | 1496  | 1126 | 206 | 1682  | 733  | 1455  | 1483 | 205 | 2384  | 752  | 1734  | 1153 | 208 | 2535  | 441  | 5732  | 885  | 209 | 737   | 345  | 999   | 674  | 208 | 927  | 247 | 989   | 459  | 212 | 2079  | 913  |
| 209 | 2163  | 773  | 1747  | 1251 | 212 | 2247  | 732  | 1729  | 1406 | 206 | 1968  | 631  | 1798  | 1111 | 210 | 2038  | 773  | 3632  | 1854 | 210 | 706   | 403  | 881   | 1015 | 206 | 1410 | 379 | 1277  | 667  | 205 | 2403  | 602  |
| 206 | 2562  | 987  | 1711  | 1355 | 208 | 2889  | 496  | 2638  | 797  | 209 | 2754  | 1154 | 2192  | 1904 | 207 | 3284  | 830  | 7637  | 1189 | 202 | 602   | 116  | 661   | 280  | 206 | 1373 | 533 | 1161  | 787  | 204 | 1655  | 506  |
| 207 | 3206  | 977  | 1954  | 1146 | 203 | 3629  | 667  |       |      |     |       |      |       |      |     |       |      |       |      |     |       |      |       |      |     |      |     |       |      |     |       |      |

|     |      |      |      |      |     |      |      |      |      |     |      |      |      |      |     |      |      |       |      |      |      |      |       |      |     |      |     |      |      |     |      |      |
|-----|------|------|------|------|-----|------|------|------|------|-----|------|------|------|------|-----|------|------|-------|------|------|------|------|-------|------|-----|------|-----|------|------|-----|------|------|
| 210 | 3780 | 1218 | 1986 | 1280 | 204 | 1649 | 490  | 1644 | 922  | 212 | 2249 | 629  | 1866 | 1023 | 212 | 2419 | 1015 | 3464  | 1709 | 208  | 1110 | 187  | 2583  | 512  | 203 | 1221 | 511 | 1236 | 874  | 208 | 2211 | 505  |
| 209 | 2173 | 1220 | 1214 | 1631 | 206 | 1643 | 713  | 1278 | 1173 | 209 | 1931 | 682  | 1584 | 947  | 208 | 1918 | 721  | 3814  | 1365 | 207  | 887  | 258  | 1925  | 615  | 205 | 1328 | 403 | 1227 | 702  | 209 | 1709 | 563  |
| 204 | 2124 | 925  | 1446 | 1376 | 204 | 2245 | 637  | 1677 | 976  | 211 | 2262 | 624  | 1748 | 838  | 207 | 2117 | 772  | 2905  | 1387 | 202  | 816  | 283  | 1622  | 664  | 205 | 1298 | 441 | 1066 | 755  | 208 | 2293 | 896  |
| 208 | 2007 | 743  | 1593 | 1199 | 207 | 1827 | 765  | 1556 | 1101 | 211 | 2658 | 1460 | 1909 | 4961 | 204 | 4820 | 1062 | 8932  | 2044 | 2009 | 1001 | 330  | 1599  | 783  | 200 | 1462 | 515 | 1152 | 848  | 208 | 2638 | 882  |
| 201 | 2522 | 796  | 1750 | 1020 | 205 | 1819 | 844  | 1387 | 1228 | 205 | 1783 | 523  | 1805 | 896  | 207 | 1821 | 465  | 5134  | 1046 | 212  | 813  | 217  | 982   | 616  | 209 | 1237 | 465 | 1267 | 756  | 207 | 1862 | 631  |
| 205 | 1936 | 728  | 1802 | 1791 | 210 | 1501 | 734  | 1294 | 1094 | 209 | 2128 | 878  | 1612 | 1335 | 209 | 2011 | 550  | 4065  | 945  | 208  | 885  | 313  | 748   | 711  | 207 | 1264 | 536 | 1245 | 851  | 211 | 1970 | 798  |
| 213 | 3786 | 964  | 3238 | 1324 | 205 | 2386 | 844  | 1835 | 1252 | 208 | 3297 | 871  | 2134 | 1423 | 208 | 1549 | 875  | 1862  | 2454 | 207  | 803  | 149  | 1076  | 317  | 199 | 1149 | 571 | 1181 | 1062 | 209 | 2041 | 693  |
| 206 | 2390 | 1044 | 1616 | 1724 | 208 | 2223 | 753  | 1669 | 1026 | 206 | 3113 | 846  | 2644 | 1412 | 206 | 1531 | 477  | 1369  | 792  | 199  | 759  | 239  | 1147  | 553  | 206 | 956  | 454 | 1090 | 1486 | 210 | 1809 | 604  |
| 210 | 2328 | 767  | 1823 | 1230 | 208 | 1514 | 498  | 1697 | 978  | 212 | 2437 | 1118 | 1863 | 3254 | 208 | 1920 | 468  | 2785  | 853  | 211  | 973  | 465  | 1637  | 775  | 207 | 1030 | 543 | 1132 | 1553 | 208 | 1589 | 500  |
| 209 | 4607 | 1045 | 4325 | 1866 | 207 | 3669 | 686  | 3020 | 971  | 207 | 3657 | 747  | 3402 | 1034 | 209 | 1866 | 307  | 2501  | 494  | 208  | 1622 | 361  | 2371  | 816  | 211 | 1065 | 270 | 1268 | 593  | 207 | 2994 | 894  |
| 210 | 3005 | 1095 | 2645 | 1908 | 208 | 2550 | 678  | 1676 | 819  | 205 | 2596 | 769  | 2170 | 1242 | 209 | 1173 | 384  | 1238  | 783  | 208  | 951  | 286  | 1089  | 727  | 205 | 1277 | 352 | 1315 | 758  | 212 | 2242 | 623  |
| 200 | 3804 | 1275 | 2703 | 2143 | 207 | 1787 | 511  | 1487 | 843  | 209 | 2098 | 1042 | 1442 | 1574 | 210 | 1299 | 485  | 1847  | 971  | 207  | 690  | 179  | 875   | 335  | 206 | 1104 | 426 | 1216 | 796  | 213 | 1653 | 703  |
| 195 | 3643 | 752  | 2933 | 1223 | 208 | 2402 | 597  | 1948 | 1060 | 212 | 3114 | 814  | 2634 | 1365 | 208 | 3139 | 783  | 3606  | 1415 | 202  | 1280 | 165  | 1645  | 370  | 205 | 1878 | 714 | 1836 | 1492 | 208 | 2673 | 526  |
| 209 | 1970 | 853  | 1359 | 1228 | 206 | 1449 | 628  | 1211 | 1083 | 209 | 2457 | 796  | 1768 | 1277 | 212 | 2806 | 1042 | 4004  | 1640 | 199  | 789  | 94   | 892   | 229  | 210 | 2922 | 467 | 8883 | 780  | 209 | 2148 | 1080 |
| 205 | 2346 | 1243 | 1707 | 1936 | 205 | 1490 | 740  | 1454 | 1387 | 209 | 1772 | 891  | 1425 | 1562 | 209 | 2133 | 509  | 5449  | 912  | 207  | 925  | 213  | 1384  | 485  | 204 | 1314 | 408 | 1074 | 634  | 209 | 1775 | 621  |
| 199 | 2527 | 1178 | 1581 | 1916 | 205 | 1843 | 630  | 1509 | 988  | 210 | 1918 | 790  | 1588 | 1339 | 210 | 1692 | 451  | 4797  | 972  | 208  | 652  | 224  | 695   | 647  | 203 | 958  | 395 | 1012 | 890  | 206 | 1559 | 525  |
| 203 | 2999 | 1064 | 1641 | 1460 | 204 | 2795 | 739  | 1888 | 877  | 203 | 2006 | 543  | 1982 | 1123 | 211 | 4019 | 2927 | 4012  | 6317 | 206  | 1074 | 176  | 1280  | 384  | 208 | 1348 | 373 | 1369 | 744  | 209 | 3649 | 1073 |
| 211 | 2916 | 770  | 2519 | 1197 | 208 | 3158 | 475  | 3046 | 673  | 208 | 3118 | 499  | 3123 | 992  | 210 | 9845 | 2860 | 7991  | 3827 | 206  | 3153 | 376  | 3906  | 737  | 210 | 2568 | 389 | 3020 | 644  | 209 | 3900 | 852  |
| 206 | 2001 | 1062 | 1792 | 1957 | 202 | 2008 | 843  | 1725 | 1433 | 208 | 2207 | 772  | 1524 | 991  | 206 | 2542 | 1445 | 2816  | 2982 | 207  | 795  | 264  | 981   | 510  | 204 | 1222 | 601 | 1064 | 1009 | 205 | 2687 | 993  |
| 206 | 3222 | 989  | 2120 | 1630 | 204 | 2516 | 727  | 1707 | 1079 | 203 | 1531 | 450  | 1578 | 789  | 212 | 1134 | 384  | 1591  | 725  | 206  | 781  | 448  | 806   | 692  | 202 | 1621 | 613 | 1030 | 989  | 202 | 1711 | 519  |
| 206 | 3436 | 1015 | 2658 | 1370 | 206 | 1653 | 474  | 1853 | 727  | 210 | 1971 | 565  | 1548 | 942  | 208 | 1316 | 698  | 1252  | 1181 | 209  | 748  | 229  | 829   | 499  | 203 | 1205 | 409 | 1226 | 783  | 210 | 3088 | 881  |
| 206 | 2403 | 489  | 2891 | 962  | 212 | 1835 | 824  | 1272 | 1483 | 201 | 2031 | 954  | 1513 | 1700 | 211 | 1379 | 270  | 2542  | 565  | 211  | 1370 | 249  | 13223 | 599  | 204 | 1126 | 509 | 1131 | 1223 | 210 | 1946 | 714  |
| 194 | 1532 | 588  | 1573 | 1176 | 210 | 2080 | 731  | 1529 | 1233 | 208 | 2352 | 985  | 1590 | 1732 | 204 | 1210 | 324  | 1321  | 772  | 210  | 832  | 246  | 1351  | 483  | 203 | 1282 | 441 | 1366 | 975  | 209 | 2060 | 746  |
| 205 | 2109 | 521  | 1817 | 857  | 212 | 1937 | 729  | 1293 | 1037 | 205 | 1763 | 963  | 1436 | 1349 | 208 | 1497 | 606  | 1887  | 988  | 200  | 717  | 130  | 816   | 330  | 204 | 1491 | 384 | 1437 | 641  | 212 | 2696 | 845  |
| 206 | 2326 | 817  | 1551 | 1514 | 203 | 1442 | 793  | 1283 | 1449 | 212 | 1794 | 706  | 1571 | 1122 | 205 | 1037 | 538  | 1072  | 909  | 209  | 615  | 87   | 641   | 218  | 208 | 1067 | 402 | 1017 | 819  | 213 | 1967 | 643  |
| 203 | 3142 | 1239 | 1724 | 1557 | 197 | 1574 | 442  | 1595 | 782  | 209 | 2746 | 717  | 3866 | 1067 | 204 | 1172 | 247  | 1479  | 566  | 208  | 855  | 262  | 1283  | 504  | 205 | 1296 | 445 | 1248 | 854  | 209 | 1836 | 420  |
| 207 | 2812 | 1054 | 1230 | 1317 | 204 | 1940 | 802  | 1843 | 1287 | 208 | 2181 | 868  | 1697 | 1198 | 210 | 1686 | 226  | 2666  | 467  | 209  | 675  | 170  | 680   | 350  | 202 | 1465 | 684 | 942  | 1062 | 209 | 2078 | 542  |
| 204 | 2408 | 894  | 1842 | 1336 | 212 | 2788 | 1035 | 1388 | 1218 | 203 | 1982 | 661  | 2129 | 993  | 208 | 1206 | 366  | 1589  | 780  | 209  | 1074 | 192  | 3121  | 448  | 207 | 1486 | 482 | 1233 | 858  | 207 | 2201 | 710  |
| 207 | 3348 | 1094 | 1448 | 1153 | 201 | 1599 | 554  | 1176 | 900  | 208 | 1890 | 661  | 1639 | 1622 | 209 | 3888 | 345  | 11065 | 795  | 208  | 768  | 152  | 805   | 324  | 205 | 1377 | 377 | 1302 | 659  | 209 | 1968 | 677  |
| 208 | 2424 | 752  | 1585 | 1157 | 209 | 1880 | 779  | 1358 | 1253 | 208 | 2197 | 653  | 2121 | 1099 | 214 | 1249 | 498  | 1695  | 965  | 212  | 711  | 283  | 736   | 705  | 206 | 1354 | 463 | 1215 | 815  | 210 | 2943 | 1111 |
| 202 | 5349 | 722  | 4705 | 1123 | 209 | 4047 | 632  | 3617 | 1065 | 210 | 5345 | 741  | 3901 | 1053 | 206 | 5778 | 1128 | 9492  | 4557 | 209  | 2540 | 165  | 3384  | 393  | 204 | 3341 | 359 | 3738 | 617  | 208 | 4951 | 644  |
| 209 | 2189 | 958  | 1991 | 1672 | 212 | 1549 | 673  | 1274 | 1070 | 211 | 2888 | 939  | 2726 | 1479 | 211 | 2278 | 540  | 2650  | 800  | 208  | 749  | 1015 | 764   | 4510 | 206 | 1239 | 469 | 1165 | 865  | 208 | 2430 | 752  |
| 207 | 2815 | 890  | 2583 | 1441 | 210 | 1493 | 500  | 1458 | 789  | 209 | 2032 | 676  | 1400 | 1070 | 207 | 1134 | 495  | 1638  | 1404 | 210  | 1320 | 354  | 729   | 668  | 203 | 1313 | 614 | 1148 | 1085 | 209 | 1582 | 682  |
| 210 | 3346 | 993  | 4546 | 1409 | 208 | 2469 | 784  | 1713 | 1187 | 205 | 2814 | 919  | 1873 | 1328 | 206 | 2426 | 426  | 3553  | 952  | 208  | 1393 | 386  | 1298  | 614  | 204 | 1710 | 377 | 1745 | 688  | 205 | 2638 | 912  |
| 212 | 4134 | 865  | 6098 | 1427 | 208 | 2427 | 574  | 1872 | 808  | 204 | 2375 | 691  | 2101 | 1242 | 208 | 1938 | 561  | 1879  | 1086 | 205  | 894  | 278  | 975   | 621  | 205 | 1303 | 658 | 1317 | 1229 | 207 | 2092 | 616  |
| 208 | 3035 | 893  | 2413 | 1405 | 206 | 1925 | 440  | 1702 | 686  | 207 | 1961 | 859  | 1472 | 1371 | 205 | 1220 | 603  | 1346  | 1103 | 211  | 736  | 168  | 801   | 435  | 208 | 1593 | 639 | 1339 | 1002 | 206 | 2829 | 701  |
| 203 | 4614 | 1046 | 3260 | 1494 | 199 | 1801 | 530  | 1722 | 926  | 210 | 2883 | 1363 | 1464 | 1752 | 206 | 1365 | 395  | 1842  | 942  | 207  | 687  | 280  | 993   | 516  | 210 | 1490 | 337 | 1308 | 695  | 211 | 3213 | 704  |
| 211 | 3327 | 1086 | 1617 | 1227 | 188 | 1934 | 728  | 1357 | 1283 | 208 | 2810 | 886  | 1804 | 1181 | 203 | 1877 | 745  | 1755  | 1346 | 204  | 626  | 284  | 685   | 605  | 204 | 1330 | 363 | 1066 | 582  | 206 | 1985 | 895  |
| 205 | 1686 | 750  | 1475 | 1285 | 209 | 1640 | 730  | 1152 | 1409 | 205 | 2605 | 609  | 1707 | 963  | 208 | 1723 | 500  | 3441  | 934  | 210  | 659  | 194  | 801   | 423  | 198 | 1535 | 590 | 1216 | 1042 | 209 | 2155 | 836  |
| 202 | 1994 | 653  | 1485 | 1061 | 209 | 2168 | 839  | 1587 | 1285 | 207 | 2620 | 942  | 1712 | 1386 | 210 | 1970 | 524  | 3868  | 868  | 205  | 836  | 175  | 1132  | 386  | 204 | 1093 | 615 | 1154 | 1708 | 209 | 1871 | 826  |
| 211 | 2998 | 1220 | 1923 | 1695 | 205 | 2271 | 859  | 1505 | 1102 | 206 | 2240 | 525  | 1917 | 854  | 209 | 1477 | 1054 | 1803  | 2985 | 210  | 791  | 247  | 864   | 475  | 212 | 791  | 452 | 1358 | 690  | 205 | 2205 | 719  |
| 210 | 2903 | 1034 | 1594 | 1337 | 206 | 1698 | 672  | 1397 | 1007 | 209 | 1624 | 350  | 1519 | 802  | 213 | 1658 | 2003 | 1618  | 3154 | 208  | 913  | 161  | 1415  | 437  | 208 | 1210 | 557 | 1049 | 833  | 206 | 2336 | 1057 |
| 209 | 2715 | 727  | 1868 | 791  | 203 | 1460 | 535  | 1503 | 961  | 209 | 2103 | 980  | 1787 | 1864 | 210 | 1111 | 567  | 1314  | 1165 | 209  | 642  | 112  | 688   | 378  | 206 | 1055 | 393 | 1009 | 705  | 210 | 1498 | 733  |
| 207 | 2240 | 740  | 1519 | 1079 | 207 | 1633 | 731  | 1348 | 1081 | 205 | 2106 | 79   |      |      |     |      |      |       |      |      |      |      |       |      |     |      |     |      |      |     |      |      |

|     |       |      |       |      |     |       |      |       |      |     |       |      |       |      |     |       |      |       |       |     |       |     |       |      |     |      |     |       |      |     |       |      |
|-----|-------|------|-------|------|-----|-------|------|-------|------|-----|-------|------|-------|------|-----|-------|------|-------|-------|-----|-------|-----|-------|------|-----|------|-----|-------|------|-----|-------|------|
| 208 | 2260  | 818  | 1366  | 1199 | 206 | 2215  | 713  | 1361  | 905  | 202 | 2841  | 824  | 1941  | 1045 | 205 | 1329  | 267  | 2357  | 581   | 211 | 699   | 147 | 892   | 380  | 201 | 1115 | 468 | 929   | 800  | 211 | 1944  | 681  |
| 212 | 2490  | 980  | 1898  | 1621 | 203 | 1729  | 732  | 1371  | 1076 | 208 | 2712  | 884  | 1842  | 1250 | 209 | 2078  | 721  | 3221  | 1329  | 211 | 754   | 129 | 841   | 352  | 205 | 1367 | 362 | 1275  | 653  | 211 | 1647  | 755  |
| 210 | 2166  | 1009 | 1744  | 1841 | 207 | 2092  | 666  | 1727  | 1132 | 207 | 2113  | 658  | 2028  | 955  | 214 | 1730  | 415  | 3415  | 833   | 208 | 945   | 237 | 2645  | 508  | 203 | 1295 | 351 | 1282  | 689  | 208 | 2168  | 740  |
| 207 | 2737  | 708  | 2382  | 1290 | 209 | 2672  | 835  | 1992  | 1764 | 211 | 2834  | 923  | 2845  | 1631 | 209 | 5482  | 2810 | 9029  | 6284  | 207 | 867   | 298 | 1447  | 875  | 207 | 1418 | 519 | 1216  | 969  | 208 | 2176  | 717  |
| 202 | 6165  | 891  | 6843  | 1775 | 212 | 4327  | 903  | 4260  | 1396 | 208 | 3215  | 1315 | 2008  | 2041 | 205 | 2646  | 1129 | 5895  | 2819  | 206 | 773   | 236 | 751   | 439  | 199 | 1393 | 530 | 1184  | 858  | 209 | 2585  | 1115 |
| 210 | 3531  | 1213 | 1594  | 1467 | 206 | 3802  | 929  | 3196  | 1508 | 209 | 3210  | 1031 | 2690  | 1678 | 209 | 3263  | 523  | 8286  | 800   | 210 | 729   | 289 | 908   | 653  | 208 | 1305 | 281 | 1323  | 511  | 214 | 2121  | 764  |
| 206 | 3095  | 1231 | 1842  | 1708 | 206 | 4329  | 849  | 4585  | 1354 | 209 | 2212  | 718  | 1730  | 1258 | 213 | 1736  | 420  | 2932  | 144   | 206 | 800   | 205 | 839   | 509  | 205 | 1398 | 530 | 1391  | 1015 | 212 | 2425  | 645  |
| 202 | 8657  | 944  | 9693  | 1504 | 207 | 3598  | 767  | 3422  | 1157 | 209 | 2240  | 944  | 1801  | 1427 | 209 | 2663  | 677  | 4117  | 1114  | 206 | 755   | 248 | 855   | 628  | 206 | 1492 | 573 | 1642  | 862  | 210 | 2498  | 722  |
| 205 | 6721  | 719  | 5937  | 1079 | 207 | 6572  | 709  | 6380  | 1318 | 205 | 7310  | 805  | 8213  | 1174 | 207 | 5476  | 404  | 7062  | 569   | 204 | 4141  | 312 | 4408  | 644  | 203 | 5367 | 346 | 8193  | 828  | 212 | 5284  | 771  |
| 210 | 5415  | 662  | 5227  | 1072 | 209 | 3544  | 428  | 3341  | 938  | 214 | 4672  | 789  | 3859  | 1183 | 206 | 2538  | 447  | 5246  | 755   | 209 | 2554  | 164 | 8670  | 300  | 210 | 1300 | 545 | 1320  | 885  | 208 | 2765  | 991  |
| 209 | 2945  | 938  | 2287  | 1329 | 209 | 1615  | 709  | 1404  | 1179 | 208 | 3162  | 994  | 2753  | 1435 | 203 | 1644  | 377  | 2006  | 741   | 210 | 676   | 141 | 739   | 324  | 206 | 1034 | 476 | 1240  | 916  | 210 | 1902  | 832  |
| 211 | 2543  | 632  | 2048  | 920  | 213 | 1635  | 919  | 1387  | 1546 | 212 | 2463  | 637  | 2087  | 1032 | 209 | 2651  | 868  | 7043  | 1788  | 202 | 762   | 249 | 1074  | 557  | 207 | 1415 | 518 | 955   | 684  | 205 | 1702  | 509  |
| 203 | 2050  | 706  | 1637  | 1006 | 209 | 2397  | 484  | 2209  | 767  | 211 | 2501  | 967  | 1723  | 1409 | 205 | 1848  | 953  | 4289  | 2434  | 211 | 672   | 271 | 908   | 603  | 199 | 1337 | 398 | 1330  | 655  | 209 | 1780  | 720  |
| 209 | 2496  | 969  | 1628  | 1483 | 208 | 3718  | 754  | 3397  | 1341 | 210 | 3509  | 1020 | 2183  | 1418 | 208 | 1621  | 782  | 3644  | 1739  | 210 | 798   | 237 | 920   | 619  | 204 | 1045 | 690 | 1388  | 1315 | 211 | 2275  | 780  |
| 209 | 24794 | 2170 | 21497 | 5265 | 204 | 14804 | 747  | 13415 | 1018 | 206 | 24035 | 1060 | 19951 | 1360 | 208 | 11739 | 401  | 16007 | 761   | 210 | 10505 | 169 | 13902 | 507  | 207 | 7892 | 353 | 11545 | 754  | 209 | 13223 | 946  |
| 210 | 3519  | 1463 | 1482  | 1832 | 201 | 2210  | 855  | 1304  | 1227 | 205 | 2840  | 851  | 1833  | 1190 | 208 | 13766 | 5289 | 22624 | 15400 | 207 | 764   | 292 | 945   | 801  | 207 | 1432 | 409 | 1623  | 804  | 207 | 2158  | 681  |
| 212 | 2615  | 960  | 1768  | 1405 | 202 | 2122  | 621  | 1787  | 876  | 207 | 1930  | 569  | 1857  | 908  | 207 | 2319  | 5815 | 4068  | 15980 | 209 | 638   | 122 | 690   | 363  | 205 | 1172 | 442 | 1145  | 752  | 207 | 2167  | 767  |
| 207 | 1978  | 920  | 2145  | 1516 | 207 | 2254  | 693  | 1531  | 888  | 208 | 1818  | 489  | 1634  | 805  | 209 | 2433  | 703  | 2765  | 927   | 199 | 794   | 268 | 888   | 688  | 207 | 1281 | 511 | 1250  | 951  | 206 | 1773  | 605  |
| 199 | 2544  | 829  | 1535  | 1258 | 204 | 1716  | 630  | 1449  | 1142 | 208 | 2136  | 621  | 1432  | 871  | 207 | 1454  | 577  | 1373  | 882   | 208 | 676   | 264 | 793   | 627  | 207 | 1042 | 447 | 1277  | 835  | 209 | 1714  | 627  |
| 203 | 3325  | 860  | 2650  | 1205 | 209 | 2266  | 619  | 2162  | 1247 | 212 | 2663  | 901  | 1450  | 1369 | 202 | 1762  | 627  | 2309  | 1136  | 211 | 676   | 232 | 772   | 534  | 205 | 1075 | 476 | 1146  | 935  | 207 | 1468  | 384  |
| 209 | 3147  | 960  | 2650  | 1467 | 210 | 3299  | 1122 | 2255  | 1381 | 206 | 2987  | 860  | 4364  | 1183 | 208 | 1446  | 465  | 1752  | 1001  | 210 | 682   | 416 | 761   | 874  | 205 | 1471 | 555 | 1169  | 815  | 206 | 2270  | 680  |
| 209 | 2765  | 1428 | 1472  | 1968 | 200 | 2391  | 845  | 1293  | 1135 | 202 | 2981  | 980  | 1974  | 1344 | 202 | 2342  | 593  | 1970  | 950   | 198 | 630   | 195 | 727   | 524  | 205 | 1039 | 297 | 1108  | 489  | 207 | 2727  | 786  |
| 208 | 2199  | 961  | 1643  | 1436 | 206 | 1587  | 537  | 1519  | 946  | 208 | 2612  | 832  | 1695  | 1350 | 206 | 1017  | 571  | 1132  | 1009  | 205 | 691   | 221 | 856   | 437  | 206 | 955  | 291 | 1069  | 584  | 209 | 2412  | 847  |
| 208 | 2102  | 811  | 1415  | 1046 | 205 | 1682  | 737  | 1270  | 1188 | 206 | 2360  | 908  | 1514  | 1425 | 201 | 1128  | 611  | 1248  | 1738  | 209 | 631   | 123 | 729   | 328  | 207 | 952  | 490 | 981   | 1059 | 208 | 2231  | 535  |
| 196 | 2111  | 887  | 1444  | 1206 | 209 | 2658  | 847  | 1569  | 1051 | 204 | 1749  | 587  | 1929  | 1046 | 213 | 1628  | 515  | 2600  | 985   | 211 | 697   | 195 | 878   | 392  | 203 | 1079 | 233 | 1218  | 528  | 210 | 1891  | 728  |
| 199 | 2175  | 662  | 1699  | 1424 | 210 | 1639  | 588  | 1365  | 1005 | 208 | 2217  | 868  | 1797  | 1238 | 210 | 1688  | 682  | 2408  | 1200  | 208 | 728   | 156 | 843   | 306  | 208 | 1517 | 601 | 1076  | 1056 | 205 | 1561  | 453  |
| 203 | 1741  | 835  | 1531  | 1784 | 210 | 1896  | 688  | 1114  | 1147 | 204 | 2209  | 676  | 2525  | 1028 | 212 | 1843  | 514  | 3823  | 1112  | 210 | 719   | 249 | 903   | 669  | 205 | 1128 | 550 | 975   | 992  | 207 | 1515  | 528  |
| 205 | 3463  | 752  | 2664  | 1172 | 209 | 4347  | 1039 | 4478  | 1912 | 207 | 4628  | 969  | 3868  | 1144 | 207 | 4944  | 1370 | 5140  | 2688  | 207 | 2398  | 369 | 2703  | 888  | 204 | 2245 | 385 | 2099  | 575  | 202 | 3466  | 755  |
| 197 | 18959 | 1452 | 17784 | 2015 | 207 | 14491 | 1001 | 13994 | 1292 | 206 | 22546 | 930  | 21059 | 1473 | 208 | 18734 | 322  | 21417 | 1284  | 210 | 11290 | 344 | 13773 | 917  | 204 | 9566 | 704 | 10428 | 1060 | 201 | 10243 | 532  |
| 208 | 4910  | 1361 | 4059  | 1761 | 207 | 5764  | 1160 | 5383  | 1606 | 207 | 2979  | 984  | 2159  | 1373 | 208 | 4399  | 1493 | 7266  | 6127  | 208 | 1448  | 190 | 1518  | 536  | 201 | 1928 | 422 | 1903  | 785  | 213 | 2403  | 767  |
| 205 | 5637  | 1142 | 4180  | 1211 | 203 | 3906  | 1026 | 2654  | 1497 | 200 | 6596  | 1165 | 5106  | 1513 | 200 | 6707  | 764  | 10370 | 1375  | 204 | 2470  | 333 | 2789  | 633  | 205 | 1418 | 474 | 2795  | 1097 | 211 | 3144  | 696  |
| 210 | 4508  | 906  | 4056  | 1103 | 206 | 2525  | 769  | 1752  | 937  | 207 | 1706  | 647  | 1620  | 1117 | 212 | 1139  | 410  | 1378  | 860   | 209 | 917   | 204 | 1797  | 496  | 204 | 2044 | 291 | 1184  | 583  | 209 | 1949  | 699  |
| 211 | 3858  | 1263 | 3126  | 1803 | 204 | 2089  | 634  | 2072  | 1067 | 211 | 2172  | 779  | 1411  | 1090 | 208 | 1628  | 811  | 3888  | 1681  | 208 | 727   | 130 | 874   | 282  | 209 | 1279 | 602 | 1162  | 1034 | 209 | 1893  | 881  |
| 207 | 2463  | 983  | 1693  | 1421 | 208 | 2370  | 709  | 1902  | 940  | 208 | 2723  | 988  | 2006  | 1588 | 207 | 3919  | 760  | 8591  | 1415  | 196 | 813   | 135 | 943   | 380  | 203 | 1295 | 420 | 1170  | 750  | 213 | 2168  | 687  |
| 209 | 2067  | 762  | 1477  | 1032 | 209 | 2074  | 850  | 1338  | 1102 | 206 | 2445  | 783  | 1879  | 1389 | 209 | 3263  | 2359 | 4961  | 8955  | 209 | 627   | 250 | 735   | 524  | 209 | 1001 | 410 | 983   | 793  | 208 | 1794  | 774  |
| 212 | 2284  | 814  | 1628  | 1299 | 205 | 2260  | 1007 | 1372  | 1430 | 207 | 1864  | 777  | 1849  | 1378 | 209 | 4426  | 926  | 6032  | 1324  | 206 | 761   | 348 | 816   | 651  | 206 | 1463 | 518 | 1263  | 820  | 207 | 2034  | 769  |
| 208 | 2095  | 948  | 1571  | 1555 | 210 | 3170  | 472  | 3152  | 855  | 210 | 2809  | 1065 | 1860  | 1504 | 208 | 3142  | 438  | 8894  | 874   | 208 | 748   | 284 | 909   | 678  | 207 | 1285 | 617 | 1172  | 1041 | 202 | 2147  | 898  |
| 207 | 1848  | 607  | 1651  | 1033 | 210 | 3192  | 754  | 3069  | 1133 | 206 | 2608  | 897  | 1692  | 1397 | 208 | 1747  | 533  | 3944  | 1061  | 211 | 676   | 266 | 669   | 772  | 204 | 1504 | 652 | 1055  | 1021 | 207 | 1664  | 841  |
| 209 | 7570  | 1380 | 9361  | 4787 | 211 | 3201  | 723  | 2329  | 1089 | 209 | 2812  | 714  | 1949  | 1025 | 208 | 1957  | 478  | 4118  | 1203  | 211 | 693   | 347 | 822   | 784  | 210 | 1087 | 318 | 1163  | 576  | 207 | 2008  | 654  |
| 209 | 2457  | 881  | 1571  | 1242 | 205 | 1959  | 763  | 1839  | 1256 | 209 | 2454  | 566  | 1840  | 861  | 205 | 1508  | 475  | 1173  | 849   | 206 | 759   | 248 | 934   | 463  | 207 | 1012 | 480 | 1051  | 886  | 210 | 2219  | 1073 |
| 209 | 2007  | 729  | 1530  | 1158 | 210 | 1632  | 660  | 1342  | 1000 | 204 | 1904  | 644  | 1342  | 1028 | 206 | 1711  | 440  | 4114  | 828   | 207 | 712   | 150 | 784   | 384  | 205 | 1065 | 379 | 1066  | 686  | 211 | 1700  | 828  |
| 208 | 2103  | 804  | 1742  | 1286 | 210 | 1479  | 762  | 1437  | 1256 | 210 | 1492  | 423  | 1753  | 811  | 213 | 2532  | 800  | 3207  | 1302  | 201 | 906   | 347 | 1837  | 811  | 207 | 1180 | 470 | 1172  | 939  | 205 | 1797  | 812  |
| 204 | 2649  | 1152 | 1285  | 1574 | 199 | 1909  | 701  | 1263  | 1058 | 208 | 1909  | 424  | 1780  | 755  | 212 | 2114  | 870  | 3453  | 1673  | 206 | 711   | 334 | 824   | 1112 | 205 | 1028 | 239 | 1062  | 566  | 207 | 2227  | 691  |
| 201 | 2551  | 1010 | 1515  | 1313 | 204 | 1812  | 558  | 1865  | 1    |     |       |      |       |      |     |       |      |       |       |     |       |     |       |      |     |      |     |       |      |     |       |      |

|     |      |      |      |      |     |      |     |      |      |     |      |      |      |      |     |      |      |      |      |     |      |     |      |      |     |      |      |      |      |     |      |      |
|-----|------|------|------|------|-----|------|-----|------|------|-----|------|------|------|------|-----|------|------|------|------|-----|------|-----|------|------|-----|------|------|------|------|-----|------|------|
| 213 | 3451 | 1407 | 1763 | 1838 | 202 | 1733 | 562 | 1625 | 967  | 211 | 3518 | 952  | 2001 | 1213 | 207 | 1579 | 496  | 2491 | 916  | 206 | 711  | 479 | 813  | 1114 | 201 | 1410 | 538  | 1263 | 867  | 208 | 2274 | 802  |
| 212 | 2543 | 845  | 2107 | 1324 | 204 | 2256 | 688 | 2669 | 1055 | 209 | 2444 | 720  | 2070 | 1251 | 208 | 1497 | 473  | 3044 | 942  | 209 | 984  | 168 | 1639 | 602  | 206 | 1250 | 524  | 1371 | 973  | 209 | 1786 | 614  |
| 212 | 3476 | 1138 | 2646 | 1856 | 206 | 2452 | 729 | 1556 | 969  | 208 | 2483 | 642  | 1925 | 936  | 209 | 1438 | 515  | 2370 | 1185 | 203 | 1189 | 300 | 1932 | 596  | 199 | 1394 | 478  | 1210 | 786  | 206 | 2644 | 1446 |
| 208 | 4840 | 773  | 4334 | 1182 | 206 | 3394 | 568 | 2537 | 987  | 204 | 4277 | 999  | 3325 | 1806 | 206 | 2296 | 494  | 3221 | 991  | 211 | 1890 | 157 | 2241 | 286  | 202 | 1590 | 633  | 1057 | 907  | 207 | 3230 | 931  |
| 208 | 3168 | 821  | 2320 | 1031 | 208 | 2897 | 810 | 2069 | 1121 | 207 | 2750 | 617  | 3092 | 891  | 208 | 1446 | 645  | 1366 | 1129 | 205 | 917  | 190 | 1317 | 412  | 208 | 1610 | 642  | 1296 | 1128 | 204 | 2124 | 476  |
| 193 | 2992 | 1045 | 2017 | 1466 | 195 | 3189 | 769 | 2459 | 1289 | 207 | 1835 | 685  | 1300 | 991  | 209 | 1752 | 903  | 3465 | 2329 | 206 | 715  | 211 | 835  | 438  | 209 | 1229 | 557  | 1133 | 1053 | 205 | 1939 | 556  |
| 208 | 3877 | 1046 | 2469 | 1359 | 200 | 2145 | 758 | 1827 | 1476 | 206 | 3395 | 682  | 2843 | 1085 | 206 | 2104 | 954  | 2679 | 3223 | 208 | 1030 | 198 | 1316 | 444  | 200 | 1792 | 510  | 1670 | 777  | 209 | 2973 | 759  |
| 202 | 2918 | 974  | 1580 | 1351 | 205 | 2239 | 737 | 1344 | 1075 | 206 | 2403 | 1004 | 1567 | 1513 | 207 | 1576 | 182  | 2634 | 445  | 212 | 721  | 236 | 862  | 685  | 205 | 1364 | 637  | 1124 | 980  | 204 | 3089 | 894  |
| 206 | 2343 | 970  | 1413 | 1506 | 208 | 1236 | 438 | 1239 | 741  | 209 | 2179 | 850  | 1983 | 1026 | 211 | 1686 | 589  | 4035 | 1126 | 210 | 1020 | 187 | 2793 | 496  | 202 | 1407 | 460  | 1432 | 781  | 204 | 2055 | 736  |
| 204 | 1677 | 589  | 1531 | 974  | 208 | 1945 | 581 | 1592 | 859  | 210 | 1788 | 438  | 2245 | 1028 | 214 | 1554 | 461  | 1915 | 922  | 204 | 710  | 132 | 806  | 293  | 207 | 879  | 314  | 954  | 596  | 209 | 2777 | 808  |
| 205 | 2608 | 685  | 2039 | 1098 | 207 | 1943 | 400 | 1748 | 632  | 209 | 2296 | 616  | 2209 | 1127 | 209 | 2463 | 646  | 2867 | 963  | 206 | 981  | 190 | 1142 | 391  | 204 | 1444 | 572  | 1210 | 992  | 203 | 2685 | 747  |
| 208 | 4180 | 1100 | 3028 | 1607 | 206 | 3180 | 457 | 2739 | 657  | 204 | 3961 | 648  | 4168 | 1219 | 210 | 4058 | 454  | 5824 | 951  | 205 | 2761 | 237 | 3662 | 621  | 203 | 2985 | 427  | 3954 | 648  | 210 | 6367 | 807  |
| 207 | 1985 | 869  | 1529 | 1352 | 208 | 1444 | 605 | 1330 | 1067 | 211 | 2830 | 972  | 1960 | 1543 | 203 | 1163 | 235  | 1516 | 563  | 209 | 626  | 118 | 659  | 300  | 207 | 1132 | 436  | 1217 | 710  | 209 | 2137 | 811  |
| 197 | 2128 | 708  | 1682 | 1172 | 207 | 1728 | 672 | 1364 | 1282 | 212 | 1596 | 602  | 1477 | 1114 | 209 | 1084 | 402  | 1240 | 950  | 211 | 806  | 214 | 1005 | 513  | 205 | 1510 | 544  | 1213 | 889  | 207 | 1746 | 558  |
| 206 | 2083 | 812  | 1683 | 1293 | 204 | 1534 | 499 | 1433 | 906  | 210 | 2154 | 781  | 1437 | 1216 | 210 | 1067 | 538  | 1410 | 1060 | 209 | 673  | 111 | 762  | 321  | 200 | 1816 | 734  | 1172 | 987  | 205 | 2049 | 912  |
| 203 | 1973 | 968  | 1513 | 1618 | 208 | 2048 | 771 | 1539 | 1246 | 203 | 2846 | 1338 | 1714 | 1722 | 200 | 1229 | 1042 | 1989 | 3065 | 209 | 804  | 318 | 1173 | 544  | 204 | 1164 | 456  | 960  | 727  | 209 | 1935 | 659  |
| 204 | 2976 | 739  | 1317 | 1077 | 207 | 3242 | 918 | 1819 | 1090 | 203 | 2339 | 718  | 1897 | 1129 | 209 | 1309 | 348  | 2077 | 830  | 210 | 818  | 141 | 991  | 315  | 206 | 1368 | 360  | 1135 | 536  | 207 | 1744 | 416  |
| 202 | 1976 | 798  | 1538 | 1391 | 208 | 1539 | 493 | 1677 | 889  | 210 | 1518 | 874  | 1506 | 1791 | 210 | 1029 | 367  | 1233 | 846  | 209 | 652  | 221 | 736  | 408  | 203 | 1372 | 573  | 1155 | 890  | 205 | 2223 | 710  |
| 211 | 1893 | 497  | 1498 | 735  | 210 | 1505 | 409 | 1526 | 746  | 208 | 2496 | 1066 | 1679 | 1474 | 203 | 1118 | 649  | 1672 | 1272 | 206 | 778  | 108 | 865  | 200  | 209 | 1229 | 809  | 1345 | 1283 | 208 | 2112 | 838  |
| 208 | 1891 | 712  | 1544 | 1104 | 211 | 1779 | 663 | 1521 | 1006 | 206 | 2708 | 788  | 1777 | 1126 | 208 | 2520 | 869  | 6095 | 1547 | 210 | 776  | 185 | 1119 | 596  | 204 | 1799 | 857  | 1056 | 1504 | 203 | 2188 | 874  |
| 209 | 2365 | 910  | 1867 | 1481 | 203 | 1688 | 732 | 1391 | 1214 | 209 | 1448 | 424  | 1456 | 760  | 211 | 2178 | 1101 | 3708 | 2220 | 212 | 750  | 285 | 1130 | 624  | 204 | 1398 | 541  | 1203 | 1042 | 208 | 1751 | 465  |
| 210 | 2096 | 963  | 1695 | 1606 | 209 | 1569 | 648 | 1366 | 1338 | 207 | 1900 | 708  | 1745 | 1301 | 208 | 1762 | 645  | 1866 | 1127 | 211 | 730  | 446 | 795  | 926  | 208 | 1444 | 463  | 1220 | 726  | 204 | 1896 | 700  |
| 211 | 2340 | 780  | 1540 | 1016 | 209 | 1614 | 827 | 1201 | 1471 | 207 | 2617 | 968  | 2047 | 1991 | 209 | 1474 | 642  | 1297 | 1199 | 206 | 612  | 130 | 658  | 326  | 205 | 1266 | 591  | 1192 | 1059 | 207 | 1818 | 543  |
| 209 | 2108 | 748  | 1566 | 1208 | 208 | 2104 | 698 | 1571 | 938  | 209 | 2634 | 950  | 2063 | 1254 | 209 | 1702 | 651  | 2498 | 1353 | 208 | 692  | 167 | 701  | 346  | 206 | 2181 | 716  | 1457 | 1491 | 202 | 1700 | 537  |
| 211 | 4964 | 1194 | 3809 | 1630 | 208 | 3596 | 530 | 3243 | 839  | 211 | 4823 | 803  | 3969 | 1386 | 207 | 5790 | 437  | 8932 | 818  | 211 | 2960 | 358 | 3690 | 942  | 202 | 5105 | 1944 | 5408 | 3362 | 201 | 5479 | 855  |
| 209 | 2631 | 778  | 1962 | 1192 | 207 | 2248 | 527 | 1650 | 746  | 206 | 3479 | 1085 | 1913 | 1372 | 198 | 1553 | 479  | 2685 | 997  | 212 | 880  | 203 | 880  | 465  | 206 | 4071 | 2401 | 2259 | 3592 | 208 | 1895 | 588  |
| 197 | 2738 | 827  | 2148 | 1115 | 206 | 2080 | 844 | 1072 | 1157 | 197 | 1786 | 648  | 1506 | 1392 | 211 | 1139 | 313  | 1199 | 676  | 206 | 946  | 343 | 2852 | 885  | 204 | 1423 | 944  | 1168 | 823  | 209 | 1609 | 494  |
| 206 | 3434 | 1170 | 2420 | 1552 | 203 | 2374 | 435 | 2406 | 749  | 208 | 2329 | 791  | 1929 | 1567 | 207 | 2373 | 372  | 3297 | 990  | 210 | 1283 | 100 | 1546 | 219  | 206 | 1368 | 825  | 1393 | 1647 | 204 | 2380 | 673  |
| 210 | 2720 | 936  | 2556 | 1558 | 211 | 2484 | 708 | 1997 | 1052 | 207 | 2086 | 391  | 2107 | 692  | 210 | 2021 | 547  | 2560 | 1353 | 209 | 1102 | 181 | 1540 | 399  | 203 | 1606 | 451  | 1598 | 733  | 210 | 2250 | 759  |
| 205 | 3504 | 955  | 2466 | 1474 | 207 | 2353 | 596 | 2433 | 921  | 209 | 2213 | 625  | 1784 | 1048 | 210 | 1218 | 734  | 1891 | 1685 | 206 | 713  | 297 | 1072 | 811  | 201 | 1594 | 803  | 1427 | 955  | 203 | 2524 | 586  |
| 210 | 2373 | 892  | 1544 | 1285 | 210 | 1856 | 709 | 1599 | 1440 | 207 | 2164 | 586  | 2027 | 976  | 208 | 1855 | 540  | 2638 | 1034 | 208 | 743  | 261 | 833  | 492  | 199 | 1402 | 359  | 1453 | 716  | 209 | 2422 | 744  |
| 207 | 2429 | 885  | 1693 | 1417 | 206 | 1961 | 688 | 1493 | 1299 | 205 | 1803 | 674  | 1552 | 1055 | 207 | 2008 | 715  | 2280 | 1267 | 205 | 1262 | 276 | 4267 | 647  | 206 | 1364 | 502  | 1162 | 769  | 206 | 2772 | 795  |
| 208 | 2292 | 727  | 1589 | 1329 | 209 | 1897 | 550 | 1627 | 862  | 208 | 2363 | 1002 | 1624 | 1304 | 209 | 1003 | 455  | 1394 | 934  | 207 | 824  | 111 | 975  | 281  | 203 | 1245 | 329  | 1420 | 672  | 212 | 2585 | 882  |
| 207 | 2391 | 768  | 1580 | 1102 | 206 | 2142 | 849 | 1902 | 1299 | 211 | 2102 | 452  | 1666 | 730  | 210 | 1705 | 508  | 2533 | 866  | 205 | 694  | 283 | 818  | 708  | 208 | 1326 | 472  | 1248 | 820  | 207 | 1843 | 561  |
| 202 | 2511 | 868  | 1673 | 1057 | 201 | 1967 | 708 | 1780 | 1280 | 206 | 2285 | 687  | 1785 | 1177 | 210 | 1811 | 440  | 2122 | 832  | 211 | 989  | 324 | 1084 | 573  | 205 | 1317 | 504  | 1176 | 852  | 207 | 1981 | 604  |
| 207 | 2832 | 985  | 1863 | 1339 | 205 | 2062 | 745 | 1536 | 1202 | 206 | 2423 | 563  | 1928 | 819  | 210 | 1201 | 490  | 1407 | 851  | 211 | 661  | 264 | 767  | 1189 | 207 | 305  | 679  | 1220 | 1154 | 207 | 2104 | 852  |
| 205 | 2442 | 794  | 1619 | 1127 | 208 | 1299 | 535 | 1310 | 1049 | 210 | 2042 | 748  | 1699 | 1280 | 211 | 1053 | 506  | 1131 | 960  | 206 | 694  | 292 | 997  | 1212 | 208 | 1173 | 501  | 1131 | 899  | 210 | 1642 | 797  |
| 207 | 1702 | 640  | 1731 | 1125 | 211 | 1588 | 610 | 1245 | 1091 | 210 | 1752 | 669  | 1930 | 1216 | 210 | 1740 | 1189 | 3107 | 3978 | 208 | 819  | 144 | 1358 | 456  | 202 | 1057 | 583  | 1268 | 962  | 205 | 1731 | 899  |
| 208 | 2278 | 1088 | 1491 | 1957 | 206 | 1690 | 698 | 1534 | 1249 | 209 | 2082 | 815  | 1899 | 1361 | 212 | 2051 | 455  | 5565 | 979  | 214 | 713  | 174 | 848  | 424  | 207 | 1408 | 233  | 1179 | 422  | 207 | 2119 | 669  |
| 204 | 2276 | 984  | 1351 | 1503 | 207 | 1706 | 585 | 1374 | 982  | 203 | 1856 | 1064 | 1367 | 1072 | 205 | 1191 | 1091 | 1215 | 3081 | 207 | 863  | 205 | 1055 | 529  | 207 | 1091 | 298  | 1141 | 760  | 210 | 2576 | 709  |
| 205 | 1696 | 694  | 1424 | 1170 | 211 | 1546 | 645 | 1317 | 1138 | 209 | 2062 | 989  | 1656 | 2106 | 204 | 1097 | 514  | 1491 | 1205 | 210 | 820  | 260 | 911  | 434  | 206 | 1112 | 324  | 1371 | 623  | 209 | 1653 | 728  |
| 200 | 1547 | 457  | 1437 | 825  | 211 | 1317 | 463 | 1179 | 838  | 213 | 1696 | 552  | 1486 | 845  | 212 | 1467 | 691  | 1583 | 1274 | 204 | 636  | 314 | 700  | 539  | 202 | 1119 | 334  | 1134 | 596  | 210 | 1992 | 713  |
| 213 | 2518 | 835  | 1477 | 1019 | 206 | 1656 | 564 | 1290 | 1018 | 209 | 2855 | 1027 | 2004 | 1368 | 203 | 1791 | 677  | 2885 | 1298 | 212 | 646  | 291 | 644  | 683  | 203 | 1442 | 718  | 1004 | 1141 | 209 | 1980 | 669  |
| 204 | 1775 | 636  | 1628 | 976  | 212 | 1967 | 592 | 1901 | 918  | 210 | 2074 | 607  | 1987 |      |     |      |      |      |      |     |      |     |      |      |     |      |      |      |      |     |      |      |

| NaCl medulla - 4 |                   |          | SS-13BN 0.4% NaCl medulla - 1 |            |               |                   |          | SS-13BN 0.4% NaCl medulla - 2 |            |               |                   |          | SS-13BN 0.4% NaCl medulla - 3 |            |               |                   |          | SS-13BN 0.4% NaCl medulla - 4 |            |               |                   |          |
|------------------|-------------------|----------|-------------------------------|------------|---------------|-------------------|----------|-------------------------------|------------|---------------|-------------------|----------|-------------------------------|------------|---------------|-------------------|----------|-------------------------------|------------|---------------|-------------------|----------|
| Signal Sleeve    | Background Sleeve | Diameter | Signal                        | Background | Signal Sleeve | Background Sleeve | Diameter | Signal                        | Background | Signal Sleeve | Background Sleeve | Diameter | Signal                        | Background | Signal Sleeve | Background Sleeve | Diameter | Signal                        | Background | Signal Sleeve | Background Sleeve | Diameter |
| 10990            | 2858              | 212      | 10241                         | 443        | 11438         | 754               | 207      | 15462                         | 749        | 18831         | 1546              | 204      | 8625                          | 951        | 10043         | 1382              | 208      | 6462                          | 421        | 6398          | 855               | 211      |
| 1911             | 1488              | 209      | 1258                          | 461        | 1374          | 818               | 206      | 1822                          | 852        | 1369          | 1310              | 206      | 2282                          | 935        | 1518          | 1587              | 210      | 1368                          | 550        | 1535          | 1063              | 211      |
| 17948            | 1450              | 207      | 33976                         | 776        | 27771         | 1481              | 209      | 19976                         | 1093       | 23368         | 1773              | 208      | 17806                         | 1082       | 18628         | 1708              | 210      | 28233                         | 648        | 25815         | 914               | 209      |
| 19273            | 1381              | 208      | 42358                         | 349        | 26398         | 771               | 209      | 30032                         | 1901       | 25660         | 8434              | 209      | 23206                         | 937        | 20646         | 1293              | 207      | 19041                         | 408        | 17313         | 672               | 207      |
| 6353             | 1488              | 209      | 12093                         | 424        | 11064         | 699               | 210      | 22033                         | 2023       | 25402         | 8511              | 209      | 6401                          | 916        | 6494          | 1144              | 209      | 3293                          | 394        | 2859          | 645               | 207      |
| 6128             | 1459              | 204      | 11927                         | 495        | 12538         | 1250              | 213      | 7439                          | 943        | 12197         | 1724              | 210      | 8761                          | 971        | 10347         | 1312              | 209      | 3499                          | 269        | 3540          | 575               | 210      |
| 9176             | 1477              | 205      | 11655                         | 460        | 10361         | 845               | 207      | 14867                         | 875        | 21708         | 1505              | 210      | 7739                          | 654        | 10147         | 1102              | 211      | 6670                          | 499        | 5543          | 763               | 205      |
| 2208             | 1337              | 209      | 1537                          | 557        | 1639          | 1530              | 209      | 2111                          | 960        | 1845          | 1482              | 208      | 2550                          | 884        | 2204          | 1476              | 210      | 1393                          | 480        | 1604          | 785               | 205      |
| 1628             | 1210              | 204      | 1364                          | 470        | 1480          | 1023              | 209      | 1990                          | 692        | 1661          | 1133              | 208      | 2803                          | 986        | 2174          | 1489              | 206      | 1487                          | 559        | 1381          | 1058              | 203      |
| 1820             | 1029              | 209      | 997                           | 378        | 1437          | 789               | 207      | 1781                          | 722        | 1567          | 1263              | 208      | 2347                          | 910        | 1939          | 1356              | 203      | 1095                          | 335        | 1130          | 808               | 209      |
| 2131             | 2955              | 208      | 1230                          | 362        | 1214          | 885               | 205      | 1949                          | 548        | 2449          | 1024              | 212      | 2536                          | 682        | 1848          | 1061              | 208      | 1552                          | 400        | 1524          | 776               | 207      |
| 1912             | 992               | 211      | 997                           | 467        | 1262          | 1037              | 208      | 1633                          | 417        | 1850          | 738               | 211      | 2225                          | 771        | 1909          | 1085              | 209      | 1354                          | 676        | 1044          | 1185              | 209      |
| 10552            | 1408              | 205      | 13821                         | 201        | 13755         | 456               | 206      | 18064                         | 945        | 21430         | 1349              | 206      | 8537                          | 701        | 11458         | 1220              | 208      | 4563                          | 334        | 4918          | 746               | 209      |
| 2187             | 1717              | 212      | 1848                          | 397        | 2142          | 665               | 210      | 3235                          | 742        | 3218          | 1074              | 203      | 3148                          | 698        | 3092          | 1249              | 207      | 1759                          | 208        | 1951          | 550               | 209      |
| 1900             | 1187              | 205      | 941                           | 532        | 1022          | 940               | 204      | 2139                          | 925        | 1551          | 1539              | 211      | 2012                          | 596        | 1598          | 972               | 207      | 1250                          | 403        | 1231          | 682               | 207      |
| 1834             | 1192              | 204      | 913                           | 237        | 1038          | 588               | 205      | 1777                          | 653        | 1666          | 1208              | 207      | 2199                          | 965        | 1888          | 1599              | 204      | 1025                          | 380        | 1056          | 773               | 209      |
| 1800             | 963               | 207      | 838                           | 192        | 863           | 476               | 209      | 2244                          | 488        | 1845          | 837               | 207      | 2622                          | 693        | 1753          | 837               | 203      | 1792                          | 544        | 1566          | 874               | 203      |
| 2362             | 1038              | 202      | 1109                          | 351        | 1185          | 737               | 205      | 2355                          | 1007       | 1982          | 2394              | 203      | 2648                          | 809        | 2155          | 1217              | 202      | 1262                          | 277        | 1419          | 763               | 209      |
| 14132            | 1691              | 203      | 18717                         | 275        | 22342         | 507               | 202      | 20822                         | 625        | 24235         | 1069              | 209      | 11260                         | 622        | 13909         | 961               | 206      | 4898                          | 554        | 4399          | 1037              | 203      |
| 1999             | 2127              | 194      | 891                           | 279        | 1004          | 583               | 209      | 1870                          | 740        | 1759          | 1270              | 211      | 2724                          | 744        | 2228          | 961               | 204      | 1226                          | 540        | 917           | 867               | 201      |
| 4007             | 2994              | 203      | 1067                          | 323        | 1346          | 597               | 208      | 1659                          | 621        | 1434          | 1001              | 209      | 2077                          | 875        | 1750          | 1336              | 207      | 1148                          | 311        | 1192          | 640               | 204      |
| 1453             | 1581              | 210      | 746                           | 332        | 832           | 664               | 207      | 9321                          | 461        | 18740         | 803               | 211      | 1809                          | 593        | 1552          | 1232              | 210      | 1131                          | 210        | 1251          | 434               | 208      |
| 1735             | 1566              | 208      | 1817                          | 414        | 1213          | 745               | 204      | 2598                          | 790        | 4562          | 1416              | 210      | 1444                          | 477        | 1335          | 1070              | 209      | 1327                          | 285        | 1402          | 437               | 208      |
| 1868             | 1190              | 207      | 876                           | 301        | 1004          | 657               | 207      | 2060                          | 789        | 1879          | 1472              | 203      | 2419                          | 1136       | 1611          | 1691              | 209      | 1249                          | 389        | 1279          | 729               | 209      |
| 13798            | 1463              | 211      | 15344                         | 746        | 18241         | 1141              | 204      | 11897                         | 737        | 16263         | 1199              | 208      | 13471                         | 822        | 16216         | 1196              | 210      | 14437                         | 661        | 12008         | 1270              | 206      |
| 20157            | 1425              | 210      | 34678                         | 542        | 24941         | 920               | 207      | 17779                         | 628        | 21134         | 1113              | 209      | 21741                         | 776        | 21459         | 1188              | 209      | 31896                         | 486        | 27297         | 847               | 209      |
| 2034             | 1570              | 203      | 1083                          | 440        | 1026          | 875               | 209      | 1824                          | 502        | 1360          | 807               | 207      | 2361                          | 1023       | 1604          | 1735              | 208      | 1375                          | 1590       | 1360          | 8176              | 207      |
| 2041             | 1710              | 205      | 1190                          | 559        | 1425          | 1049              | 205      | 2058                          | 676        | 1969          | 928               | 206      | 2535                          | 1137       | 1575          | 1811              | 208      | 1315                          | 483        | 1333          | 903               | 208      |
| 1655             | 1659              | 204      | 1474                          | 452        | 1944          | 804               | 210      | 1828                          | 636        | 1703          | 1039              | 210      | 2778                          | 1064       | 2299          | 1487              | 209      | 1571                          | 829        | 1565          | 1764              | 203      |
| 2064             | 1468              | 207      | 900                           | 328        | 977           | 593               | 206      | 2415                          | 872        | 1648          | 1342              | 203      | 2784                          | 939        | 1699          | 1201              | 203      | 1373                          | 760        | 1184          | 1756              | 207      |
| 17572            | 1104              | 210      | 22181                         | 378        | 20351         | 734               | 210      | 22445                         | 1273       | 22502         | 2048              | 201      | 18633                         | 776        | 19573         | 1114              | 206      | 21172                         | 292        | 22839         | 547               | 213      |
| 11732            | 1460              | 210      | 14587                         | 525        | 16042         | 1502              | 208      | 13356                         | 694        | 18781         | 1682              | 209      | 14549                         | 987        | 16573         | 1270              | 205      | 13889                         | 641        | 13850         | 1003              | 203      |
| 19956            | 2027              | 207      | 30301                         | 260        | 24783         | 665               | 210      | 29895                         | 730        | 25822         | 1199              | 209      | 29475                         | 1404       | 21142         | 2042              | 205      | 33237                         | 305        | 24307         | 653               | 212      |
| 15385            | 1709              | 209      | 12230                         | 482        | 12219         | 833               | 198      | 19834                         | 978        | 21678         | 1250              | 205      | 15689                         | 956        | 17713         | 1176              | 205      | 13518                         | 375        | 14574         | 1031              | 211      |
| 2137             | 3114              | 213      | 1231                          | 311        | 1370          | 617               | 209      | 2444                          | 919        | 1937          | 1361              | 208      | 3293                          | 995        | 1973          | 1269              | 202      | 1363                          | 318        | 1561          | 653               | 210      |
| 1658             | 1204              | 198      | 1075                          | 449        | 1074          | 775               | 202      | 1415                          | 567        | 1515          | 1172              | 207      | 1982                          | 587        | 1685          | 1040              | 210      | 1453                          | 418        | 1152          | 665               | 208      |
| 1611             | 1444              | 208      | 954                           | 405        | 1118          | 720               | 209      | 2320                          | 802        | 1680          | 1378              | 208      | 1932                          | 554        | 1700          | 1006              | 210      | 1582                          | 440        | 1271          | 751               | 204      |
| 2309             | 847               | 206      | 973                           | 343        | 1020          | 698               | 206      | 2188                          | 657        | 1698          | 1063              | 204      | 2422                          | 1011       | 2011          | 1676              | 208      | 1330                          | 415        | 1483          | 901               | 207      |
| 1835             | 1184              | 205      | 855                           | 342        | 1024          | 709               | 207      | 2451                          | 900        | 1489          | 1205              | 207      | 2475                          | 1094       | 1772          | 1922              | 205      | 1414                          | 469        | 1272          | 860               | 208      |
| 2672             | 1380              | 203      | 1948                          | 213        | 2203          | 413               | 205      | 3664                          | 786        | 3572          | 1228              | 206      | 3095                          | 833        | 3485          | 1570              | 209      | 2031                          | 329        | 2268          | 608               | 210      |
| 1419             | 1243              | 209      | 741                           | 262        | 838           | 628               | 205      | 1603                          | 528        | 1714          | 1114              | 211      | 1835                          | 722        | 1759          | 1318              | 208      | 1390                          | 664        | 1423          | 1107              | 206      |
| 1518             | 1547              | 208      | 1053                          | 276        | 1457          | 627               | 202      | 1596                          | 568        | 1625          | 818               | 208      | 2367                          | 862        | 1702          | 1244              | 209      | 1282                          | 404        | 1305          | 789               | 208      |
| 1560             | 1371              | 203      | 871                           | 342        | 986           | 742               | 206      | 1846                          | 665        | 1629          | 1356              | 213      | 2751                          | 997        | 1557          | 1463              | 202      | 1129                          | 387        | 1041          | 865               | 211      |
| 1488             | 1334              | 204      | 1255                          | 668        | 1253          | 1168              | 205      | 1645                          | 432        | 1707          | 863               | 208      | 2659                          | 761        | 1809          | 1081              | 204      | 1385                          | 420        | 1375          | 704               | 208      |
| 1911             | 1691              | 209      | 849                           | 366        | 958           | 865               | 206      | 2795                          | 1142       | 1748          | 1577              | 207      | 1645                          | 518        | 1967          | 907               | 210      | 1247                          | 398        | 1114          | 728               | 210      |
| 1502             | 951               | 208      | 782                           | 454        | 919           | 1021              | 207      | 1414                          | 637        | 1546          | 1218              | 209      | 1391                          | 529        | 1712          | 1105              | 209      | 1065                          | 88         | 1240          | 240               | 209      |
| 1782             | 1290              | 202      | 834                           | 386        | 965           | 865               | 206      | 2279                          | 1030       | 1782          | 1478              | 204      | 1368                          | 386        | 1552          | 973               | 213      | 1154                          | 381        | 1233          | 755               | 211      |
| 1887             | 1285              | 202      | 910                           | 417        | 886           | 993               | 205      | 2230                          | 849        | 1700          | 1159              | 202      | 2060                          | 874        | 1738          | 1454              | 208      | 1417                          | 582        | 1324          | 964               | 208      |
| 7539             | 1585              | 205      | 8451                          | 2936       | 8583          | 4846              | 205      | 11899                         | 887        | 14121         | 1329              | 206      | 6985                          | 1027       | 9204          | 1528              | 207      | 7667                          | 821        | 5844          | 1416              | 207      |
| 1981             | 2149              | 199      | 7808                          | 3031       | 8218          | 4873              | 203      | 2418                          | 698        | 2040          | 1017              | 207      | 3652                          | 1064       | 2314          | 1317              | 204      | 1969                          | 554        | 2328          | 913               | 207      |
| 1685             | 1627              | 209      | 1624                          | 525        | 1788          | 936               | 206      | 1860                          | 438        | 1922          | 989               | 210      | 2545                          | 840        | 1946          | 1238              | 204      | 1415                          | 348        | 1515          | 655               | 209      |
| 1997             | 1101              | 212      | 2533                          | 951        | 1508          | 1247              | 207      | 3183                          | 485        | 3032          | 802               | 211      | 3057                          | 949        | 2521          | 1370              | 211      | 1781                          | 468        | 1692          | 769               | 210      |
| 3683             | 1789              | 208      | 3948                          | 711        | 3479          | 1222              | 208      | 4962                          | 1021       | 5332          | 1514              | 206      | 5489                          | 1072       | 5239          | 1587              | 206      | 3236                          | 676        | 3082          | 1126              | 206      |
| 1757             | 1372              | 207      | 1223                          | 622        | 998           | 1369              | 207      | 2304                          | 871        | 1783          | 1497              | 210      | 2781                          | 916        | 2276          | 1371              | 203      | 1452                          | 710        | 1179          | 1312              | 207      |
| 19603            | 2096              | 206      | 18978                         | 495        | 21374         | 1015              | 209      | 15899                         | 558        | 21871         | 920               | 209      | 16173                         | 782        | 20450         | 1064              | 207      | 13996                         | 317        | 15880         | 694               | 207      |
| 2085             | 2009              | 204      | 1546                          | 383        | 1631          | 617               | 208      | 3794                          | 704        | 4006          | 1013              | 206      | 3202                          | 1128       | 2143          | 1327              | 208      | 1250                          | 379        | 1214          | 743               | 210      |
| 2983             | 2487              | 212      | 1595                          | 292        | 1557          | 625               | 210      | 3371                          | 714        | 3187          | 1355              | 210      | 3611                          | 851        | 2692          | 1132              | 208      | 2053                          | 489        | 2024          | 838               | 210      |
| 2444             | 1452              | 211      | 2889                          | 322        | 3044          | 678               | 207      | 5206                          | 1129       | 4675          | 1812              | 208      | 3392                          | 667        | 3292          | 943               | 207      | 2608                          | 539        | 2246          | 892               | 204      |
| 1477             | 1578              | 208      | 941                           | 381        | 1039          | 770               | 207      | 3037                          | 684        | 3941          | 1512              | 211      | 2412                          | 875        | 1815          | 1302              | 209      | 1482                          | 349        | 1787          | 615               | 208      |
| 1792             | 1297              | 206      | 993                           | 278        | 1064          | 54                |          |                               |            |               |                   |          |                               |            |               |                   |          |                               |            |               |                   |          |

|       |       |     |       |     |       |      |     |       |      |       |       |     |       |      |       |      |     |       |     |       |      |     |
|-------|-------|-----|-------|-----|-------|------|-----|-------|------|-------|-------|-----|-------|------|-------|------|-----|-------|-----|-------|------|-----|
| 1854  | 1140  | 208 | 1140  | 332 | 1210  | 726  | 207 | 2092  | 833  | 1663  | 1263  | 207 | 2892  | 796  | 2129  | 1054 | 202 | 1243  | 406 | 1410  | 919  | 207 |
| 1679  | 1204  | 203 | 1147  | 496 | 1109  | 825  | 204 | 2121  | 790  | 1862  | 1380  | 208 | 1925  | 568  | 1486  | 816  | 209 | 1114  | 415 | 1217  | 856  | 212 |
| 1751  | 1147  | 203 | 1066  | 328 | 1100  | 551  | 204 | 1986  | 647  | 1766  | 947   | 208 | 1997  | 441  | 1831  | 663  | 207 | 1078  | 338 | 1088  | 596  | 210 |
| 1411  | 1546  | 207 | 988   | 380 | 1034  | 779  | 209 | 1359  | 364  | 1507  | 792   | 205 | 2661  | 905  | 1713  | 1408 | 205 | 1047  | 386 | 1216  | 761  | 210 |
| 1523  | 1887  | 209 | 894   | 433 | 982   | 818  | 206 | 1312  | 388  | 1590  | 871   | 212 | 2917  | 716  | 1995  | 931  | 199 | 986   | 362 | 1159  | 732  | 207 |
| 1993  | 1276  | 207 | 1175  | 470 | 1114  | 741  | 205 | 1588  | 537  | 1560  | 1003  | 211 | 3322  | 1205 | 1675  | 1473 | 208 | 1068  | 382 | 1152  | 1017 | 211 |
| 1518  | 1226  | 211 | 1193  | 482 | 1639  | 796  | 206 | 4194  | 4913 | 7443  | 13215 | 195 | 2189  | 805  | 1627  | 1160 | 208 | 1165  | 425 | 1253  | 635  | 209 |
| 2313  | 1568  | 212 | 1364  | 352 | 1636  | 745  | 208 | 2192  | 653  | 2197  | 1096  | 208 | 2532  | 992  | 2048  | 1585 | 205 | 1180  | 448 | 1226  | 846  | 209 |
| 20326 | 798   | 205 | 20710 | 418 | 22332 | 901  | 209 | 27178 | 869  | 23403 | 1358  | 210 | 15607 | 570  | 19799 | 1108 | 210 | 5691  | 312 | 7023  | 734  | 209 |
| 13053 | 1670  | 209 | 9237  | 348 | 11934 | 618  | 210 | 20909 | 615  | 23329 | 933   | 203 | 8747  | 784  | 11850 | 1520 | 208 | 9453  | 271 | 11776 | 525  | 208 |
| 5876  | 1829  | 204 | 4809  | 409 | 6729  | 836  | 209 | 10198 | 538  | 14788 | 880   | 208 | 5379  | 1065 | 7555  | 1778 | 209 | 3150  | 721 | 3931  | 1338 | 206 |
| 4227  | 1012  | 207 | 5053  | 301 | 7413  | 618  | 204 | 7605  | 880  | 11555 | 1679  | 209 | 3369  | 927  | 3484  | 1503 | 209 | 1583  | 460 | 1522  | 928  | 207 |
| 3258  | 1041  | 211 | 4846  | 501 | 6343  | 831  | 209 | 5196  | 784  | 7169  | 1581  | 207 | 2797  | 624  | 3152  | 1016 | 210 | 3987  | 573 | 4098  | 1073 | 200 |
| 1653  | 1490  | 205 | 977   | 421 | 1123  | 833  | 208 | 2397  | 849  | 1700  | 1428  | 204 | 1532  | 512  | 1581  | 900  | 209 | 1567  | 448 | 1669  | 793  | 210 |
| 2104  | 1659  | 208 | 1044  | 329 | 1219  | 708  | 208 | 2302  | 764  | 1713  | 1249  | 202 | 1982  | 1008 | 1557  | 1558 | 205 | 1322  | 655 | 1258  | 1206 | 202 |
| 10933 | 1046  | 208 | 6630  | 381 | 10258 | 597  | 203 | 7517  | 1002 | 11041 | 1582  | 204 | 7032  | 798  | 10952 | 1300 | 208 | 5651  | 549 | 8215  | 977  | 209 |
| 2568  | 1158  | 206 | 821   | 209 | 1120  | 558  | 207 | 3030  | 1105 | 1278  | 1524  | 197 | 1892  | 496  | 1718  | 748  | 209 | 1215  | 506 | 1228  | 935  | 209 |
| 1402  | 911   | 205 | 926   | 392 | 967   | 692  | 211 | 1659  | 689  | 1558  | 1358  | 207 | 2195  | 633  | 1849  | 1014 | 205 | 1502  | 538 | 1184  | 738  | 205 |
| 1896  | 1368  | 203 | 908   | 299 | 993   | 660  | 200 | 1952  | 818  | 1536  | 1800  | 205 | 1926  | 876  | 1746  | 1767 | 210 | 1087  | 343 | 1256  | 625  | 208 |
| 2965  | 1294  | 211 | 3029  | 281 | 3555  | 636  | 208 | 8455  | 3369 | 16257 | 12001 | 209 | 3989  | 960  | 3414  | 1227 | 205 | 1921  | 442 | 2200  | 833  | 211 |
| 1764  | 1384  | 204 | 950   | 234 | 1087  | 487  | 207 | 1552  | 556  | 1676  | 1381  | 207 | 3770  | 1337 | 2215  | 1511 | 197 | 1378  | 458 | 1294  | 834  | 209 |
| 1940  | 1139  | 206 | 1123  | 215 | 1304  | 502  | 209 | 2082  | 723  | 1965  | 1210  | 208 | 2466  | 1011 | 1579  | 1530 | 204 | 1042  | 341 | 1175  | 733  | 213 |
| 1764  | 1097  | 207 | 1120  | 343 | 1096  | 641  | 209 | 2211  | 531  | 2002  | 901   | 210 | 1901  | 759  | 1663  | 1247 | 207 | 1152  | 384 | 1291  | 809  | 207 |
| 2539  | 1465  | 203 | 802   | 381 | 825   | 850  | 206 | 1876  | 658  | 1999  | 1219  | 210 | 1881  | 702  | 1973  | 1311 | 212 | 1128  | 475 | 1176  | 929  | 207 |
| 1424  | 1196  | 196 | 1238  | 443 | 1792  | 870  | 209 | 1867  | 729  | 1607  | 1156  | 209 | 2033  | 1062 | 1758  | 2071 | 209 | 1101  | 486 | 1189  | 878  | 205 |
| 1873  | 987   | 207 | 874   | 340 | 1003  | 582  | 208 | 3081  | 1417 | 2195  | 2592  | 207 | 1811  | 961  | 1419  | 1741 | 207 | 1091  | 342 | 1231  | 827  | 206 |
| 1634  | 1670  | 202 | 1929  | 713 | 1638  | 1027 | 200 | 1779  | 922  | 1485  | 1514  | 211 | 2885  | 993  | 1857  | 1460 | 204 | 1185  | 395 | 1109  | 785  | 205 |
| 1463  | 1643  | 209 | 1551  | 648 | 1764  | 1028 | 210 | 2848  | 1099 | 6006  | 1714  | 207 | 2174  | 630  | 1847  | 1010 | 205 | 1031  | 349 | 1070  | 638  | 209 |
| 1665  | 1314  | 203 | 1176  | 723 | 1505  | 2688 | 211 | 1643  | 543  | 1428  | 876   | 210 | 1796  | 482  | 1890  | 956  | 213 | 1139  | 336 | 1293  | 663  | 210 |
| 1646  | 1207  | 207 | 1278  | 408 | 1471  | 704  | 210 | 1767  | 611  | 1949  | 1027  | 206 | 2520  | 1008 | 1621  | 1573 | 206 | 1048  | 238 | 1219  | 565  | 210 |
| 5665  | 1257  | 212 | 4025  | 407 | 5793  | 785  | 205 | 11318 | 6086 | 10261 | 16477 | 198 | 5202  | 1114 | 5925  | 2085 | 205 | 3586  | 545 | 4517  | 864  | 209 |
| 1732  | 891   | 208 | 1037  | 444 | 1025  | 740  | 205 | 2518  | 910  | 1903  | 1439  | 208 | 1796  | 666  | 1692  | 1306 | 207 | 1412  | 517 | 1305  | 820  | 211 |
| 4513  | 1078  | 213 | 951   | 221 | 1060  | 442  | 207 | 3617  | 1134 | 3457  | 1409  | 203 | 1635  | 498  | 1439  | 832  | 211 | 1122  | 438 | 1164  | 851  | 205 |
| 3901  | 1180  | 210 | 3142  | 268 | 3589  | 619  | 206 | 9739  | 1137 | 11324 | 1614  | 204 | 2954  | 353  | 3574  | 785  | 212 | 3062  | 413 | 3107  | 700  | 204 |
| 1472  | 1526  | 206 | 924   | 350 | 1064  | 707  | 208 | 1689  | 581  | 1653  | 1099  | 209 | 2978  | 1115 | 1968  | 1621 | 204 | 1331  | 455 | 1025  | 930  | 207 |
| 1746  | 855   | 208 | 1050  | 369 | 1093  | 697  | 205 | 2033  | 786  | 1953  | 1521  | 210 | 2115  | 806  | 1331  | 1171 | 204 | 1280  | 507 | 1274  | 1096 | 211 |
| 16889 | 1090  | 207 | 14394 | 572 | 17000 | 906  | 212 | 21657 | 918  | 22664 | 1492  | 207 | 12510 | 326  | 17418 | 706  | 208 | 14929 | 581 | 18037 | 1120 | 210 |
| 3013  | 1012  | 209 | 1531  | 285 | 1726  | 563  | 209 | 3648  | 840  | 4482  | 1327  | 205 | 2203  | 434  | 2611  | 1002 | 209 | 1776  | 270 | 2200  | 623  | 211 |
| 3021  | 1693  | 211 | 1309  | 329 | 1604  | 775  | 211 | 5560  | 1136 | 5912  | 1653  | 205 | 3651  | 1082 | 2842  | 1368 | 202 | 2345  | 504 | 2804  | 811  | 208 |
| 13181 | 1224  | 208 | 4895  | 382 | 6193  | 806  | 211 | 8330  | 725  | 11334 | 1371  | 207 | 7956  | 628  | 12256 | 1133 | 205 | 9573  | 554 | 11927 | 994  | 206 |
| 1793  | 1299  | 209 | 1526  | 659 | 1166  | 1034 | 205 | 2093  | 525  | 1720  | 737   | 206 | 2540  | 1143 | 1916  | 2113 | 204 | 1308  | 448 | 1350  | 952  | 207 |
| 13513 | 1440  | 201 | 8714  | 488 | 11686 | 1101 | 207 | 16325 | 907  | 20053 | 1539  | 207 | 9173  | 756  | 12395 | 1181 | 212 | 8643  | 399 | 12121 | 844  | 208 |
| 2081  | 1950  | 205 | 1551  | 406 | 1582  | 1031 | 208 | 3133  | 1754 | 2758  | 5150  | 203 | 2581  | 1218 | 2200  | 2001 | 208 | 1360  | 194 | 1505  | 352  | 209 |
| 1716  | 1286  | 209 | 965   | 324 | 1134  | 666  | 209 | 8097  | 3128 | 17689 | 11906 | 210 | 2097  | 940  | 1594  | 1267 | 200 | 1088  | 483 | 1059  | 1074 | 205 |
| 1909  | 1187  | 199 | 1117  | 561 | 1217  | 1054 | 211 | 1706  | 680  | 1976  | 1491  | 210 | 2996  | 1035 | 2018  | 1322 | 201 | 1240  | 450 | 1258  | 820  | 207 |
| 1528  | 1357  | 205 | 969   | 409 | 1096  | 736  | 211 | 1742  | 630  | 1694  | 1141  | 209 | 2304  | 906  | 1762  | 1263 | 205 | 1650  | 788 | 1088  | 1184 | 198 |
| 1568  | 1137  | 208 | 1072  | 388 | 1458  | 677  | 212 | 2029  | 861  | 1522  | 1280  | 202 | 1971  | 766  | 1530  | 1178 | 206 | 1249  | 477 | 1257  | 839  | 210 |
| 1480  | 1529  | 211 | 1021  | 434 | 1294  | 886  | 208 | 2308  | 1046 | 1705  | 1432  | 206 | 1624  | 535  | 1678  | 970  | 210 | 1248  | 440 | 1270  | 1157 | 209 |
| 1514  | 1411  | 205 | 804   | 392 | 827   | 774  | 208 | 1347  | 447  | 1472  | 827   | 208 | 2403  | 998  | 1604  | 1686 | 208 | 1038  | 391 | 1067  | 1161 | 209 |
| 1650  | 1272  | 209 | 1002  | 328 | 1060  | 719  | 207 | 1759  | 608  | 2008  | 1126  | 211 | 2794  | 1097 | 2029  | 1539 | 201 | 1036  | 437 | 1134  | 1065 | 204 |
| 2286  | 1268  | 206 | 1766  | 620 | 1558  | 894  | 206 | 1536  | 593  | 1750  | 943   | 209 | 2222  | 726  | 1482  | 1067 | 203 | 1088  | 438 | 1132  | 867  | 210 |
| 1864  | 1256  | 203 | 1799  | 617 | 1790  | 1105 | 203 | 4994  | 1314 | 11556 | 1814  | 205 | 2189  | 552  | 4113  | 947  | 212 | 1044  | 333 | 1194  | 705  | 207 |
| 1681  | 1392  | 209 | 1342  | 584 | 1752  | 1233 | 206 | 1270  | 529  | 1512  | 1167  | 211 | 2489  | 807  | 1678  | 1363 | 205 | 1214  | 304 | 1329  | 609  | 209 |
| 2022  | 1649  | 205 | 1165  | 470 | 1226  | 890  | 211 | 1532  | 539  | 1505  | 894   | 211 | 2718  | 1258 | 1977  | 1934 | 207 | 1227  | 382 | 1209  | 632  | 211 |
| 2465  | 10965 | 204 | 2930  | 328 | 4419  | 627  | 210 | 4483  | 757  | 5602  | 1468  | 207 | 3537  | 691  | 3858  | 975  | 208 | 2274  | 401 | 2649  | 795  | 207 |
| 5071  | 1331  | 211 | 1170  | 362 | 1485  | 939  | 208 | 2574  | 814  | 3006  | 1660  | 210 | 2016  | 669  | 2233  | 1187 | 209 | 1503  | 452 | 1726  | 859  | 208 |
| 1562  | 1763  | 205 | 2113  | 215 | 6315  | 442  | 206 | 1652  | 344  | 1644  | 621   | 209 | 2016  | 682  | 1782  | 1142 | 210 | 1462  | 745 | 1124  | 1284 | 209 |
| 1804  | 1485  | 208 | 1342  | 501 | 2016  | 966  | 207 | 2490  | 641  | 1865  | 935   | 204 | 2027  | 779  | 1700  | 1193 | 205 | 1122  | 231 | 1177  | 497  | 210 |
| 1667  | 1504  | 204 | 920   | 430 | 998   | 924  | 209 | 2048  | 830  | 1639  | 1336  | 205 | 2287  | 884  | 2044  | 1354 | 206 | 1085  | 307 | 1126  | 650  | 210 |
| 3495  | 883   | 207 | 1039  | 532 | 1447  | 900  | 207 | 2120  | 726  | 1942  | 1280  | 208 | 2241  | 790  | 1799  | 1244 | 208 | 1141  | 414 | 1067  | 766  | 204 |
| 12560 | 656   | 212 | 9442  | 446 | 13476 | 879  | 205 | 13794 | 729  | 18577 | 1245  | 203 | 9533  | 675  | 12363 | 1068 | 208 | 7359  | 507 | 10231 | 873  | 210 |
| 15340 | 1011  | 209 | 70    |     |       |      |     |       |      |       |       |     |       |      |       |      |     |       |     |       |      |     |

|       |      |     |       |     |       |      |     |       |      |       |       |     |       |      |       |      |     |       |     |       |      |     |
|-------|------|-----|-------|-----|-------|------|-----|-------|------|-------|-------|-----|-------|------|-------|------|-----|-------|-----|-------|------|-----|
| 1531  | 1344 | 208 | 1076  | 307 | 1184  | 608  | 209 | 2000  | 640  | 1536  | 1129  | 204 | 3006  | 1203 | 1634  | 1531 | 196 | 1501  | 456 | 1535  | 730  | 206 |
| 1307  | 1486 | 205 | 1254  | 424 | 1299  | 814  | 208 | 2737  | 872  | 1608  | 1201  | 197 | 2091  | 799  | 1804  | 1250 | 206 | 1213  | 462 | 1290  | 852  | 210 |
| 1811  | 1372 | 205 | 1461  | 620 | 1154  | 996  | 207 | 2522  | 3542 | 1805  | 12138 | 202 | 2337  | 664  | 1956  | 1042 | 206 | 1054  | 409 | 1137  | 652  | 210 |
| 8927  | 1578 | 212 | 8654  | 424 | 9043  | 710  | 208 | 17535 | 1160 | 20970 | 1994  | 208 | 8679  | 899  | 10179 | 1275 | 208 | 6596  | 575 | 6454  | 981  | 208 |
| 1740  | 1340 | 211 | 1487  | 557 | 1325  | 919  | 207 | 3441  | 1839 | 1342  | 2686  | 201 | 2507  | 777  | 2108  | 1199 | 212 | 1313  | 433 | 1404  | 804  | 210 |
| 20848 | 1714 | 207 | 25973 | 554 | 26522 | 818  | 207 | 25019 | 1159 | 24403 | 1592  | 199 | 17466 | 842  | 19915 | 1336 | 209 | 18147 | 515 | 18598 | 768  | 207 |
| 18302 | 1379 | 206 | 38565 | 473 | 26982 | 910  | 212 | 28225 | 990  | 24711 | 1439  | 208 | 20319 | 862  | 18374 | 1208 | 212 | 26795 | 738 | 22596 | 1065 | 204 |
| 5711  | 1532 | 208 | 16171 | 575 | 16822 | 857  | 205 | 16583 | 795  | 18972 | 1298  | 207 | 6229  | 1257 | 5799  | 1806 | 207 | 5152  | 647 | 5355  | 976  | 206 |
| 7294  | 1429 | 208 | 10576 | 349 | 10662 | 603  | 210 | 9436  | 682  | 13989 | 1157  | 207 | 6418  | 1235 | 7009  | 1823 | 200 | 6153  | 504 | 6800  | 892  | 205 |
| 8148  | 1465 | 211 | 10744 | 437 | 11471 | 730  | 209 | 18332 | 1073 | 21189 | 1698  | 205 | 6985  | 883  | 7807  | 1526 | 208 | 6165  | 195 | 6677  | 432  | 211 |
| 1800  | 1321 | 205 | 1705  | 546 | 1908  | 892  | 210 | 3019  | 1336 | 1681  | 1788  | 198 | 3024  | 738  | 2159  | 1051 | 209 | 1528  | 380 | 1420  | 713  | 208 |
| 1851  | 1430 | 207 | 1829  | 631 | 1417  | 891  | 201 | 2967  | 1072 | 1496  | 1368  | 204 | 2491  | 525  | 2105  | 836  | 212 | 1408  | 455 | 1304  | 815  | 208 |
| 1968  | 1535 | 207 | 1350  | 396 | 1372  | 651  | 203 | 2038  | 725  | 1768  | 1205  | 207 | 1824  | 503  | 1787  | 921  | 210 | 1251  | 504 | 1102  | 778  | 207 |
| 1864  | 1798 | 208 | 1447  | 487 | 1556  | 850  | 210 | 2963  | 1170 | 1593  | 1640  | 195 | 2153  | 836  | 1829  | 1565 | 212 | 1602  | 472 | 1437  | 733  | 209 |
| 1663  | 1452 | 200 | 1545  | 731 | 794   | 1131 | 203 | 1627  | 705  | 1307  | 1159  | 209 | 2316  | 759  | 1908  | 1151 | 213 | 1591  | 519 | 1298  | 809  | 207 |
| 1961  | 1293 | 210 | 13149 | 387 | 13563 | 642  | 211 | 13740 | 682  | 19144 | 1213  | 209 | 7787  | 823  | 9885  | 1567 | 208 | 5750  | 337 | 6354  | 680  | 209 |
| 1511  | 1428 | 208 | 2118  | 475 | 2399  | 873  | 207 | 3082  | 546  | 2923  | 804   | 209 | 3040  | 1164 | 2268  | 1732 | 207 | 2000  | 482 | 2180  | 1124 | 211 |
| 1864  | 1394 | 203 | 900   | 365 | 983   | 777  | 207 | 1917  | 661  | 2033  | 1028  | 210 | 3234  | 1056 | 1733  | 1322 | 201 | 1170  | 607 | 1117  | 1241 | 207 |
| 1953  | 1416 | 208 | 1043  | 360 | 1171  | 789  | 208 | 1823  | 715  | 1613  | 1156  | 206 | 3054  | 1251 | 1839  | 1663 | 204 | 1939  | 687 | 1152  | 1035 | 196 |
| 1688  | 1313 | 206 | 950   | 351 | 1114  | 871  | 208 | 2290  | 1000 | 1617  | 1690  | 202 | 2606  | 862  | 2069  | 1166 | 205 | 1157  | 424 | 1246  | 715  | 208 |
| 2349  | 1750 | 209 | 1292  | 257 | 1399  | 638  | 207 | 2184  | 932  | 1950  | 1698  | 208 | 2941  | 932  | 1666  | 1168 | 205 | 1679  | 601 | 1511  | 869  | 206 |
| 14055 | 2369 | 203 | 20153 | 423 | 21378 | 1009 | 212 | 25348 | 799  | 25326 | 1420  | 208 | 9709  | 832  | 11652 | 1326 | 208 | 5027  | 629 | 5620  | 1177 | 209 |
| 1560  | 1063 | 207 | 899   | 173 | 946   | 417  | 209 | 2253  | 929  | 1378  | 1931  | 207 | 3068  | 1248 | 1810  | 1632 | 204 | 1174  | 323 | 1423  | 624  | 205 |
| 2170  | 1232 | 206 | 1278  | 433 | 2846  | 896  | 206 | 1781  | 881  | 1542  | 1468  | 209 | 2238  | 635  | 2266  | 895  | 209 | 1094  | 408 | 1215  | 840  | 212 |
| 1511  | 1938 | 209 | 885   | 413 | 1031  | 923  | 210 | 1603  | 671  | 1442  | 1113  | 203 | 1973  | 592  | 1582  | 870  | 208 | 1089  | 318 | 1163  | 659  | 209 |
| 1368  | 2189 | 206 | 1028  | 371 | 1214  | 655  | 201 | 1464  | 572  | 1566  | 1300  | 209 | 2268  | 883  | 1871  | 1090 | 207 | 1183  | 580 | 1157  | 1087 | 208 |
| 1829  | 1347 | 208 | 1087  | 491 | 1097  | 781  | 207 | 2041  | 769  | 1663  | 1417  | 207 | 2265  | 816  | 1465  | 1183 | 201 | 1205  | 313 | 1474  | 685  | 209 |
| 12927 | 1608 | 210 | 15178 | 940 | 14533 | 1729 | 208 | 14881 | 1158 | 17672 | 1207  | 198 | 10259 | 887  | 13231 | 1331 | 212 | 11470 | 446 | 10931 | 706  | 209 |
| 20892 | 974  | 206 | 35503 | 831 | 23915 | 988  | 207 | 20885 | 1619 | 21186 | 1548  | 205 | 18786 | 846  | 19479 | 1360 | 209 | 22538 | 517 | 21806 | 1077 | 210 |
| 1723  | 1550 | 194 | 1436  | 558 | 1772  | 917  | 209 | 3289  | 1214 | 1716  | 1546  | 205 | 2113  | 768  | 1893  | 1519 | 211 | 1106  | 557 | 1118  | 1110 | 209 |
| 1848  | 1439 | 211 | 1534  | 592 | 1227  | 1014 | 209 | 1862  | 857  | 1665  | 1493  | 209 | 2324  | 719  | 1875  | 1070 | 212 | 1435  | 476 | 1248  | 774  | 209 |
| 1758  | 934  | 208 | 1460  | 614 | 1346  | 1281 | 210 | 1703  | 539  | 1834  | 904   | 212 | 2929  | 815  | 1882  | 1166 | 209 | 1764  | 643 | 1578  | 976  | 206 |
| 1905  | 1852 | 208 | 1294  | 531 | 2032  | 1142 | 208 | 2257  | 992  | 1907  | 1424  | 203 | 3679  | 1116 | 1445  | 1429 | 199 | 1579  | 577 | 1505  | 1037 | 207 |
| 15880 | 1545 | 203 | 21512 | 457 | 22060 | 1035 | 214 | 27900 | 1212 | 25332 | 1834  | 201 | 15362 | 1037 | 17756 | 1770 | 207 | 22938 | 559 | 22806 | 967  | 204 |
| 14522 | 1616 | 209 | 16829 | 484 | 16739 | 880  | 205 | 22855 | 1193 | 23478 | 1939  | 207 | 11648 | 652  | 15362 | 1440 | 213 | 12966 | 543 | 13922 | 876  | 207 |
| 19433 | 1371 | 210 | 34599 | 552 | 25559 | 888  | 211 | 32874 | 1181 | 25295 | 1921  | 209 | 30207 | 799  | 22598 | 1419 | 209 | 29890 | 427 | 26243 | 803  | 212 |
| 14293 | 1477 | 212 | 10206 | 665 | 9191  | 1044 | 206 | 16748 | 592  | 19874 | 924   | 210 | 13130 | 706  | 14963 | 1148 | 212 | 16425 | 460 | 20235 | 767  | 209 |
| 2080  | 1642 | 208 | 1285  | 577 | 1048  | 873  | 206 | 2407  | 682  | 2128  | 1093  | 206 | 2833  | 1020 | 1674  | 1579 | 201 | 1498  | 302 | 1445  | 497  | 209 |
| 1688  | 1540 | 205 | 1167  | 409 | 1156  | 768  | 209 | 1817  | 716  | 1664  | 1064  | 210 | 2694  | 1182 | 2062  | 1853 | 210 | 1423  | 456 | 1324  | 792  | 209 |
| 1362  | 1391 | 208 | 1286  | 552 | 965   | 888  | 206 | 1430  | 376  | 1776  | 804   | 212 | 2044  | 665  | 1550  | 1029 | 208 | 1082  | 456 | 1132  | 757  | 211 |
| 2299  | 1651 | 208 | 1755  | 737 | 1366  | 1116 | 206 | 2387  | 668  | 1772  | 954   | 207 | 2362  | 834  | 1866  | 1692 | 212 | 1526  | 366 | 1595  | 610  | 209 |
| 1797  | 1301 | 204 | 937   | 408 | 885   | 836  | 208 | 1756  | 654  | 1630  | 1387  | 207 | 2227  | 865  | 1738  | 1356 | 208 | 1397  | 379 | 1253  | 706  | 207 |
| 2487  | 1488 | 208 | 2119  | 500 | 2370  | 1059 | 206 | 2698  | 460  | 3215  | 752   | 210 | 2587  | 556  | 2819  | 861  | 210 | 1690  | 177 | 1957  | 424  | 211 |
| 1809  | 1189 | 209 | 860   | 356 | 898   | 1048 | 209 | 1655  | 847  | 1599  | 1957  | 207 | 2561  | 1029 | 1962  | 1510 | 206 | 1024  | 342 | 1024  | 637  | 207 |
| 1887  | 1017 | 208 | 1041  | 354 | 1053  | 684  | 209 | 1759  | 662  | 1464  | 1067  | 211 | 2082  | 687  | 1691  | 1166 | 208 | 1169  | 425 | 1295  | 1061 | 211 |
| 1545  | 1085 | 208 | 873   | 157 | 1008  | 416  | 210 | 1851  | 539  | 1786  | 856   | 211 | 2068  | 816  | 1633  | 1228 | 210 | 1107  | 406 | 1226  | 998  | 210 |
| 1591  | 967  | 212 | 917   | 273 | 1082  | 562  | 208 | 1392  | 373  | 1553  | 744   | 211 | 2154  | 841  | 1831  | 1349 | 210 | 1214  | 454 | 1247  | 866  | 207 |
| 1517  | 1153 | 208 | 1026  | 576 | 1199  | 1118 | 207 | 1523  | 596  | 1453  | 994   | 204 | 1922  | 655  | 1491  | 909  | 205 | 1270  | 491 | 1210  | 822  | 208 |
| 1530  | 1179 | 209 | 866   | 481 | 914   | 1077 | 210 | 2276  | 905  | 1695  | 1325  | 205 | 2414  | 579  | 1901  | 781  | 207 | 1168  | 339 | 1539  | 740  | 209 |
| 1728  | 1441 | 206 | 1102  | 464 | 947   | 736  | 206 | 1647  | 629  | 1587  | 1347  | 209 | 2638  | 777  | 2302  | 986  | 205 | 1471  | 497 | 1436  | 960  | 202 |
| 1737  | 1277 | 209 | 1206  | 613 | 2262  | 1058 | 205 | 1721  | 630  | 1582  | 1262  | 209 | 2676  | 943  | 1748  | 1408 | 203 | 1103  | 285 | 1244  | 521  | 209 |
| 6077  | 1609 | 210 | 8229  | 992 | 8723  | 2142 | 209 | 13445 | 1141 | 16348 | 1348  | 204 | 7648  | 1121 | 8879  | 1507 | 199 | 6119  | 308 | 7625  | 589  | 209 |
| 1795  | 2073 | 206 | 2381  | 773 | 1385  | 909  | 206 | 3242  | 1324 | 1839  | 1837  | 204 | 2869  | 1106 | 2049  | 1970 | 207 | 1871  | 452 | 4212  | 807  | 211 |
| 1716  | 1257 | 206 | 1476  | 534 | 1114  | 785  | 208 | 3314  | 1128 | 1880  | 1378  | 204 | 2682  | 815  | 2060  | 1575 | 212 | 1505  | 353 | 1602  | 620  | 208 |
| 2161  | 1647 | 212 | 2555  | 555 | 2123  | 871  | 201 | 3599  | 770  | 3298  | 1095  | 211 | 2859  | 1009 | 2103  | 1355 | 212 | 2305  | 445 | 2043  | 689  | 209 |
| 3498  | 1602 | 207 | 3783  | 652 | 3854  | 1151 | 210 | 4728  | 758  | 5537  | 1034  | 209 | 5129  | 1242 | 4570  | 1479 | 206 | 3915  | 509 | 3708  | 813  | 205 |
| 1937  | 2049 | 204 | 2348  | 752 | 1269  | 931  | 205 | 2181  | 789  | 2119  | 1221  | 208 | 4129  | 1299 | 1959  | 1506 | 198 | 1898  | 611 | 1196  | 845  | 206 |
| 19036 | 1511 | 207 | 22692 | 820 | 20528 | 1312 | 209 | 19138 | 863  | 22433 | 1362  | 207 | 15196 | 1373 | 18788 | 1952 | 205 | 17103 | 564 | 19879 | 941  | 206 |
| 2139  | 1644 | 195 | 1935  | 723 | 1713  | 1252 | 206 | 2775  | 781  | 2980  | 1279  | 210 | 2581  | 856  | 2040  | 1432 | 210 | 1430  | 604 | 1507  | 1748 | 210 |
| 2606  | 1747 | 202 | 2275  | 557 | 1798  | 866  | 205 | 2660  | 587  | 2827  | 964   | 210 | 3964  | 936  | 3076  | 1299 | 205 | 2084  | 501 | 2033  | 741  | 209 |
| 2518  | 1440 | 208 | 4752  | 764 | 4119  | 1109 | 208 | 5606  | 790  | 4942  | 1030  | 205 | 3702  | 602  | 4181  | 1246 | 2   |       |     |       |      |     |

|       |      |     |       |     |       |      |     |       |      |       |      |     |       |      |       |      |     |       |     |       |      |     |
|-------|------|-----|-------|-----|-------|------|-----|-------|------|-------|------|-----|-------|------|-------|------|-----|-------|-----|-------|------|-----|
| 1405  | 1617 | 203 | 1058  | 466 | 1151  | 1083 | 207 | 1426  | 599  | 1630  | 1130 | 210 | 2129  | 674  | 1493  | 879  | 200 | 873   | 355 | 915   | 718  | 208 |
| 2272  | 948  | 201 | 1524  | 157 | 1758  | 382  | 198 | 2627  | 971  | 2750  | 1522 | 206 | 2485  | 1193 | 2144  | 2318 | 207 | 1172  | 282 | 1189  | 522  | 211 |
| 19630 | 1372 | 210 | 26236 | 341 | 24983 | 669  | 212 | 19528 | 931  | 20073 | 1536 | 204 | 15636 | 529  | 19441 | 1248 | 212 | 4787  | 536 | 5796  | 1052 | 202 |
| 11364 | 787  | 210 | 11392 | 331 | 12876 | 562  | 206 | 18825 | 1261 | 21132 | 1794 | 199 | 7574  | 637  | 9817  | 1041 | 211 | 7876  | 369 | 11051 | 738  | 208 |
| 4371  | 1438 | 199 | 4964  | 234 | 9106  | 458  | 208 | 6747  | 636  | 11145 | 1085 | 207 | 4941  | 1054 | 5287  | 1408 | 201 | 4378  | 356 | 5738  | 664  | 207 |
| 2713  | 1287 | 202 | 3410  | 235 | 3985  | 538  | 205 | 4795  | 831  | 6952  | 1267 | 208 | 4000  | 910  | 3924  | 1218 | 203 | 1566  | 298 | 1687  | 476  | 204 |
| 2726  | 1484 | 205 | 4313  | 445 | 5445  | 947  | 209 | 4492  | 589  | 5065  | 839  | 206 | 3204  | 749  | 2820  | 1124 | 206 | 2892  | 279 | 3494  | 638  | 212 |
| 1773  | 1501 | 206 | 986   | 342 | 1032  | 616  | 200 | 2473  | 629  | 2027  | 836  | 202 | 1650  | 509  | 1576  | 923  | 210 | 1261  | 565 | 1468  | 1119 | 209 |
| 1440  | 1452 | 208 | 1140  | 510 | 1241  | 917  | 207 | 1562  | 439  | 1515  | 650  | 206 | 2317  | 1028 | 1751  | 1416 | 206 | 1185  | 333 | 1239  | 660  | 208 |
| 9231  | 1460 | 203 | 6396  | 433 | 10307 | 886  | 212 | 4038  | 602  | 5546  | 964  | 209 | 5461  | 833  | 8023  | 1423 | 209 | 7203  | 307 | 11545 | 688  | 209 |
| 1737  | 1520 | 210 | 913   | 516 | 1171  | 1180 | 208 | 1522  | 679  | 1379  | 1142 | 207 | 2126  | 966  | 1792  | 1747 | 207 | 1364  | 645 | 1338  | 1392 | 211 |
| 1543  | 1226 | 203 | 862   | 561 | 883   | 1381 | 209 | 1402  | 555  | 1355  | 1074 | 208 | 2253  | 1025 | 1773  | 1731 | 204 | 1316  | 476 | 1122  | 872  | 204 |
| 1533  | 1337 | 207 | 1082  | 555 | 987   | 935  | 205 | 1509  | 452  | 1678  | 877  | 212 | 2429  | 986  | 1634  | 1477 | 205 | 1190  | 336 | 1170  | 670  | 209 |
| 3463  | 1563 | 208 | 3077  | 363 | 3440  | 714  | 209 | 2990  | 724  | 3119  | 1308 | 211 | 3425  | 1125 | 2247  | 1850 | 207 | 1372  | 220 | 1483  | 433  | 212 |
| 1268  | 1581 | 197 | 1103  | 333 | 1158  | 690  | 208 | 2954  | 984  | 2065  | 1382 | 195 | 1704  | 585  | 1697  | 1340 | 213 | 1597  | 425 | 1572  | 806  | 208 |
| 1591  | 724  | 211 | 1271  | 427 | 1138  | 635  | 207 | 1580  | 602  | 1403  | 1018 | 207 | 1993  | 722  | 1615  | 1148 | 212 | 1194  | 361 | 1217  | 691  | 204 |
| 2039  | 959  | 210 | 1110  | 316 | 1059  | 506  | 207 | 1354  | 582  | 1355  | 1190 | 212 | 2155  | 932  | 1619  | 1726 | 211 | 1133  | 535 | 1082  | 967  | 210 |
| 1725  | 1049 | 203 | 1184  | 410 | 1007  | 623  | 210 | 2144  | 847  | 1906  | 1430 | 209 | 2226  | 1098 | 1782  | 1762 | 212 | 1020  | 258 | 1142  | 536  | 210 |
| 1698  | 949  | 210 | 2172  | 765 | 1987  | 1580 | 206 | 2331  | 905  | 1560  | 1290 | 208 | 1752  | 557  | 1537  | 1041 | 208 | 1263  | 441 | 1211  | 719  | 212 |
| 1674  | 1072 | 211 | 1621  | 885 | 966   | 1701 | 207 | 1604  | 535  | 1368  | 877  | 205 | 2270  | 716  | 1693  | 1077 | 204 | 1659  | 514 | 1263  | 799  | 207 |
| 1634  | 1452 | 210 | 1368  | 500 | 1082  | 743  | 208 | 2046  | 871  | 1537  | 1286 | 210 | 2570  | 1003 | 1894  | 1438 | 204 | 1139  | 252 | 1224  | 422  | 208 |
| 1737  | 1336 | 206 | 1743  | 711 | 1085  | 988  | 201 | 1507  | 752  | 1617  | 1403 | 209 | 2249  | 891  | 1642  | 1255 | 207 | 1143  | 571 | 970   | 1309 | 210 |
| 1664  | 1113 | 204 | 1618  | 529 | 1189  | 760  | 207 | 1364  | 702  | 1223  | 1165 | 209 | 3201  | 934  | 2059  | 1240 | 206 | 1074  | 525 | 839   | 940  | 209 |
| 1655  | 1528 | 207 | 1393  | 433 | 1094  | 743  | 209 | 1679  | 799  | 1374  | 1415 | 207 | 2022  | 665  | 1811  | 1080 | 208 | 1208  | 516 | 1402  | 834  | 208 |
| 4517  | 1183 | 204 | 4810  | 555 | 6465  | 922  | 208 | 7746  | 635  | 8788  | 900  | 207 | 5387  | 977  | 5598  | 1327 | 202 | 3142  | 505 | 3910  | 917  | 207 |
| 1659  | 661  | 207 | 1180  | 289 | 1084  | 529  | 204 | 1605  | 565  | 1532  | 1055 | 209 | 2321  | 888  | 1868  | 1554 | 204 | 1141  | 382 | 1244  | 1100 | 208 |
| 1517  | 957  | 208 | 1301  | 369 | 1589  | 664  | 205 | 1914  | 686  | 1628  | 1356 | 208 | 1806  | 601  | 1629  | 1214 | 207 | 1183  | 370 | 1201  | 1027 | 210 |
| 3659  | 1873 | 204 | 3414  | 279 | 3965  | 812  | 208 | 6558  | 835  | 8307  | 1453 | 201 | 3240  | 585  | 3443  | 893  | 210 | 3386  | 201 | 4429  | 539  | 208 |
| 1718  | 1540 | 202 | 906   | 394 | 1043  | 931  | 211 | 1932  | 703  | 1568  | 1133 | 205 | 1583  | 323  | 1767  | 856  | 212 | 989   | 421 | 1015  | 855  | 206 |
| 1512  | 1158 | 210 | 1029  | 201 | 1309  | 437  | 212 | 1900  | 724  | 1616  | 1021 | 210 | 2032  | 734  | 1812  | 1129 | 206 | 1490  | 412 | 1448  | 892  | 208 |
| 12128 | 1384 | 205 | 13746 | 390 | 16291 | 679  | 207 | 14353 | 689  | 17656 | 983  | 207 | 13841 | 1021 | 13134 | 1517 | 205 | 18644 | 629 | 22257 | 1185 | 207 |
| 1915  | 1158 | 203 | 1773  | 274 | 2174  | 692  | 208 | 3271  | 554  | 3820  | 1017 | 204 | 3143  | 959  | 2089  | 1338 | 204 | 2873  | 604 | 3267  | 1105 | 210 |
| 1647  | 998  | 205 | 1328  | 397 | 1527  | 691  | 207 | 3340  | 571  | 3311  | 792  | 210 | 2589  | 849  | 1819  | 1156 | 203 | 2852  | 330 | 3533  | 673  | 211 |
| 6085  | 1487 | 207 | 5160  | 327 | 7999  | 778  | 207 | 5688  | 415  | 9871  | 851  | 210 | 6082  | 746  | 5315  | 1439 | 207 | 10537 | 434 | 16078 | 797  | 209 |
| 1668  | 1874 | 207 | 863   | 411 | 914   | 697  | 207 | 2101  | 655  | 1849  | 1257 | 209 | 2301  | 787  | 1643  | 1077 | 204 | 1621  | 645 | 1406  | 1097 | 210 |
| 8265  | 1515 | 208 | 7306  | 415 | 9059  | 706  | 207 | 15915 | 978  | 18744 | 1696 | 201 | 6905  | 918  | 7064  | 1726 | 207 | 8547  | 533 | 12692 | 1109 | 211 |
| 1668  | 1636 | 212 | 1673  | 442 | 1641  | 991  | 207 | 2696  | 1151 | 2039  | 2116 | 207 | 2368  | 1037 | 1828  | 1594 | 203 | 1320  | 312 | 1487  | 602  | 212 |
| 1844  | 1362 | 207 | 1174  | 464 | 1167  | 967  | 207 | 1648  | 531  | 1676  | 1129 | 210 | 2466  | 878  | 1740  | 1303 | 202 | 1374  | 522 | 1170  | 938  | 205 |
| 2021  | 1748 | 205 | 1260  | 525 | 1325  | 178  | 206 | 2077  | 582  | 2023  | 955  | 211 | 2746  | 894  | 1921  | 1568 | 204 | 1393  | 511 | 1170  | 821  | 206 |
| 1530  | 1565 | 208 | 1845  | 715 | 1502  | 1006 | 200 | 2347  | 677  | 5026  | 1332 | 207 | 1581  | 577  | 1483  | 1101 | 209 | 1312  | 389 | 1343  | 877  | 210 |
| 2324  | 1247 | 206 | 985   | 449 | 1154  | 729  | 206 | 1774  | 640  | 1639  | 1067 | 205 | 2179  | 1004 | 1838  | 2069 | 209 | 1346  | 560 | 1280  | 992  | 211 |
| 1607  | 1273 | 206 | 1071  | 362 | 1183  | 675  | 206 | 1894  | 777  | 1578  | 1716 | 209 | 1981  | 656  | 1775  | 1134 | 208 | 1201  | 406 | 1125  | 637  | 208 |
| 1613  | 1239 | 208 | 1284  | 594 | 1125  | 986  | 209 | 1890  | 589  | 1572  | 1037 | 207 | 1968  | 692  | 1535  | 1227 | 202 | 1487  | 539 | 981   | 822  | 202 |
| 1665  | 1024 | 209 | 1372  | 488 | 1240  | 805  | 209 | 2120  | 695  | 1782  | 1026 | 205 | 2698  | 898  | 1733  | 1469 | 202 | 828   | 302 | 943   | 571  | 208 |
| 1386  | 1082 | 206 | 1755  | 649 | 1217  | 1073 | 206 | 2048  | 861  | 1640  | 1307 | 206 | 2471  | 982  | 1488  | 1375 | 205 | 1588  | 495 | 1110  | 796  | 204 |
| 1393  | 1274 | 204 | 1678  | 848 | 1420  | 1262 | 206 | 1479  | 479  | 1481  | 879  | 212 | 2218  | 1004 | 1821  | 1377 | 204 | 1149  | 418 | 1325  | 912  | 207 |
| 1742  | 1185 | 211 | 1326  | 617 | 1324  | 1212 | 207 | 1634  | 553  | 1731  | 947  | 209 | 2219  | 850  | 1474  | 1292 | 203 | 1013  | 607 | 1101  | 1256 | 211 |
| 1855  | 998  | 212 | 1503  | 760 | 1707  | 1360 | 209 | 1476  | 637  | 1700  | 1630 | 212 | 2288  | 754  | 1638  | 1191 | 203 | 1109  | 383 | 1175  | 758  | 211 |
| 2932  | 1304 | 209 | 2462  | 322 | 3724  | 550  | 206 | 4365  | 765  | 5246  | 1207 | 201 | 3748  | 852  | 3465  | 1155 | 200 | 2806  | 619 | 2853  | 961  | 204 |
| 1619  | 967  | 209 | 939   | 356 | 1210  | 774  | 210 | 2535  | 980  | 1820  | 1535 | 207 | 3658  | 1286 | 2085  | 1539 | 196 | 1387  | 535 | 1149  | 956  | 207 |
| 1695  | 979  | 206 | 1219  | 408 | 1101  | 699  | 206 | 1937  | 886  | 1624  | 1600 | 209 | 3182  | 1113 | 1995  | 1542 | 205 | 1171  | 289 | 1311  | 482  | 208 |
| 1776  | 1184 | 204 | 997   | 425 | 1156  | 722  | 209 | 1658  | 839  | 1796  | 1399 | 210 | 2505  | 754  | 1984  | 1053 | 198 | 1222  | 266 | 1320  | 529  | 210 |
| 2367  | 1631 | 199 | 910   | 422 | 1013  | 762  | 210 | 1825  | 827  | 1610  | 1345 | 208 | 2089  | 816  | 1807  | 1448 | 204 | 1497  | 342 | 1571  | 804  | 209 |
| 1351  | 1123 | 205 | 1054  | 432 | 1169  | 846  | 205 | 2044  | 830  | 1585  | 1312 | 210 | 2718  | 806  | 2040  | 1241 | 207 | 1122  | 454 | 949   | 784  | 209 |
| 11710 | 1668 | 209 | 7388  | 395 | 8984  | 774  | 208 | 12570 | 687  | 18203 | 1071 | 205 | 9525  | 821  | 11212 | 1233 | 207 | 5520  | 641 | 7497  | 1186 | 210 |
| 12064 | 2234 | 205 | 5938  | 482 | 8075  | 1017 | 210 | 10537 | 649  | 15086 | 1258 | 209 | 8902  | 708  | 13112 | 974  | 207 | 4839  | 488 | 8193  | 984  | 209 |
| 2035  | 1265 | 201 | 934   | 409 | 1059  | 770  | 209 | 1603  | 489  | 1271  | 985  | 208 | 1948  | 771  | 1588  | 1328 | 208 | 1650  | 590 | 1524  | 1206 | 209 |
| 2599  | 1443 | 195 | 1856  | 586 | 3241  | 806  | 200 | 1353  | 315  | 1800  | 747  | 208 | 1926  | 838  | 1649  | 1376 | 209 | 1350  | 425 | 1102  | 675  | 205 |
| 1780  | 1285 | 202 | 1598  | 655 | 1145  | 990  | 203 | 1600  | 663  | 1300  | 1268 | 210 | 2157  | 792  | 1539  | 1218 | 209 | 1173  | 358 | 1165  | 732  | 210 |
| 1578  | 1163 | 202 | 1484  | 526 | 1267  | 767  | 206 | 1676  | 802  | 1532  | 1563 | 209 | 1667  | 550  | 1765  | 1013 | 207 | 941   | 493 | 1006  | 959  | 211 |
| 1872  | 1521 | 208 | 1182  | 354 | 1417  | 672  | 208 | 2895  | 1067 | 1794  | 2248 | 204 | 2229  | 987  | 2141  | 1455 | 204 | 1519  | 492 | 1360  | 774  | 204 |
| 1937  | 764  | 210 | 1147  | 416 | 1011  | 655  |     |       |      |       |      |     |       |      |       |      |     |       |     |       |      |     |



|       |      |     |              |      |       |      |     |              |      |       |      |     |              |      |       |      |     |              |     |       |      |     |
|-------|------|-----|--------------|------|-------|------|-----|--------------|------|-------|------|-----|--------------|------|-------|------|-----|--------------|-----|-------|------|-----|
| 18991 | 1880 | 213 | <b>42843</b> | 824  | 25763 | 1198 | 208 | <b>30945</b> | 1133 | 25196 | 1593 | 209 | <b>25063</b> | 1091 | 19088 | 1895 | 204 | <b>22800</b> | 373 | 24083 | 648  | 211 |
| 6464  | 1721 | 205 | <b>14582</b> | 1007 | 12385 | 1456 | 205 | <b>15723</b> | 878  | 19047 | 1187 | 206 | <b>7316</b>  | 1089 | 7543  | 1251 | 209 | <b>5515</b>  | 285 | 6402  | 602  | 210 |
| 5626  | 1686 | 209 | <b>12721</b> | 727  | 14911 | 1025 | 206 | <b>10806</b> | 1006 | 14647 | 1125 | 208 | <b>8013</b>  | 1284 | 8583  | 1609 | 205 | <b>6310</b>  | 394 | 8297  | 783  | 210 |
| 8509  | 1648 | 209 | <b>14264</b> | 980  | 13361 | 1197 | 205 | <b>23129</b> | 1291 | 22330 | 1599 | 200 | <b>8246</b>  | 953  | 8966  | 1489 | 206 | <b>9305</b>  | 579 | 9370  | 988  | 201 |
| 2060  | 1980 | 193 | <b>1900</b>  | 769  | 1683  | 1227 | 212 | <b>2215</b>  | 897  | 1557  | 1386 | 208 | <b>3246</b>  | 1157 | 2061  | 1496 | 201 | <b>1287</b>  | 589 | 1339  | 1135 | 209 |
| 2188  | 1422 | 209 | <b>2548</b>  | 746  | 1508  | 984  | 208 | <b>2896</b>  | 915  | 1735  | 1492 | 202 | <b>4077</b>  | 1591 | 2496  | 1976 | 204 | <b>1582</b>  | 384 | 1627  | 792  | 209 |
| 1762  | 1333 | 209 | <b>1173</b>  | 496  | 1597  | 913  | 209 | <b>2654</b>  | 1235 | 1515  | 1791 | 197 | <b>2628</b>  | 1141 | 1869  | 1645 | 206 | <b>1328</b>  | 429 | 1370  | 717  | 207 |
| 1664  | 1133 | 208 | <b>1745</b>  | 533  | 1459  | 806  | 206 | <b>3106</b>  | 936  | 2198  | 1567 | 209 | <b>2523</b>  | 760  | 2103  | 1248 | 208 | <b>1489</b>  | 403 | 1503  | 992  | 209 |
| 1753  | 1160 | 202 | <b>1652</b>  | 448  | 1318  | 655  | 202 | <b>3055</b>  | 1131 | 1942  | 1625 | 213 | <b>2349</b>  | 1113 | 4577  | 1956 | 211 | <b>1215</b>  | 372 | 1344  | 721  | 207 |
| 10652 | 1671 | 202 | <b>15689</b> | 494  | 16003 | 709  | 208 | <b>16821</b> | 820  | 20910 | 1400 | 208 | <b>11415</b> | 1127 | 11614 | 2152 | 201 | <b>7560</b>  | 380 | 8749  | 747  | 212 |
| 2393  | 1088 | 210 | <b>2508</b>  | 490  | 2248  | 773  | 206 | <b>2773</b>  | 345  | 3623  | 702  | 212 | <b>3797</b>  | 689  | 3465  | 949  | 208 | <b>2019</b>  | 344 | 2337  | 700  | 209 |
| 1626  | 841  | 210 | <b>1293</b>  | 507  | 1192  | 841  | 206 | <b>1570</b>  | 478  | 1596  | 858  | 207 | <b>3012</b>  | 1040 | 1668  | 1344 | 203 | <b>1201</b>  | 395 | 1331  | 683  | 214 |
| 1929  | 1429 | 208 | <b>1373</b>  | 656  | 1398  | 1443 | 203 | <b>1290</b>  | 520  | 1346  | 1029 | 210 | <b>3809</b>  | 1314 | 2512  | 1768 | 195 | <b>1435</b>  | 566 | 1058  | 847  | 210 |
| 1700  | 1193 | 210 | <b>1109</b>  | 320  | 1136  | 630  | 210 | <b>1686</b>  | 562  | 1325  | 944  | 208 | <b>1888</b>  | 766  | 1653  | 1526 | 209 | <b>1293</b>  | 428 | 1162  | 686  | 208 |
| 2304  | 1155 | 213 | <b>1516</b>  | 692  | 1511  | 1542 | 205 | <b>2528</b>  | 815  | 2089  | 1215 | 203 | <b>2060</b>  | 907  | 1670  | 1438 | 208 | <b>1190</b>  | 446 | 1359  | 994  | 210 |
| 14019 | 1212 | 213 | <b>20178</b> | 320  | 22512 | 643  | 213 | <b>27459</b> | 1220 | 24480 | 1788 | 209 | <b>10864</b> | 460  | 14613 | 941  | 209 | <b>6720</b>  | 609 | 6961  | 952  | 210 |
| 1595  | 1223 | 209 | <b>933</b>   | 265  | 852   | 506  | 211 | <b>1885</b>  | 517  | 1613  | 786  | 205 | <b>2090</b>  | 820  | 1616  | 1605 | 205 | <b>1030</b>  | 399 | 1138  | 868  | 207 |
| 1684  | 887  | 205 | <b>1314</b>  | 526  | 1049  | 918  | 205 | <b>1613</b>  | 805  | 1381  | 1303 | 210 | <b>2358</b>  | 627  | 1646  | 1131 | 206 | <b>1847</b>  | 573 | 2821  | 799  | 201 |
| 1716  | 994  | 207 | <b>824</b>   | 357  | 946   | 796  | 210 | <b>1416</b>  | 589  | 1413  | 985  | 211 | <b>2079</b>  | 1061 | 1506  | 1796 | 210 | <b>1070</b>  | 373 | 1050  | 754  | 206 |
| 1330  | 1475 | 209 | <b>1066</b>  | 453  | 1151  | 894  | 209 | <b>1714</b>  | 866  | 1475  | 1386 | 209 | <b>1676</b>  | 669  | 1754  | 1472 | 208 | <b>1227</b>  | 525 | 1181  | 965  | 208 |
| 1792  | 1486 | 211 | <b>1124</b>  | 294  | 1352  | 544  | 212 | <b>1520</b>  | 573  | 1440  | 1201 | 207 | <b>2141</b>  | 855  | 1749  | 1826 | 209 | <b>1088</b>  | 396 | 1172  | 916  | 208 |
| 13173 | 1450 | 210 | <b>17233</b> | 1060 | 14689 | 2142 | 207 | <b>13100</b> | 923  | 18442 | 1309 | 204 | <b>13372</b> | 976  | 16994 | 1476 | 211 | <b>11067</b> | 251 | 12768 | 375  | 212 |
| 19099 | 1378 | 208 | <b>34900</b> | 707  | 24883 | 1187 | 208 | <b>19266</b> | 926  | 23038 | 1439 | 209 | <b>21319</b> | 1157 | 19608 | 1812 | 205 | <b>26479</b> | 603 | 24975 | 874  | 208 |
| 1689  | 1231 | 207 | <b>1379</b>  | 570  | 1333  | 895  | 212 | <b>1716</b>  | 544  | 1327  | 942  | 211 | <b>2801</b>  | 1046 | 1723  | 1528 | 208 | <b>1209</b>  | 523 | 1177  | 827  | 210 |
| 1965  | 2027 | 211 | <b>1974</b>  | 663  | 1059  | 779  | 204 | <b>2170</b>  | 597  | 1762  | 857  | 212 | <b>3074</b>  | 1033 | 1887  | 1500 | 206 | <b>1178</b>  | 439 | 1303  | 610  | 212 |
| 1835  | 2145 | 207 | <b>2170</b>  | 818  | 2054  | 1230 | 203 | <b>2966</b>  | 961  | 2011  | 1330 | 203 | <b>3267</b>  | 1003 | 1974  | 1299 | 202 | <b>1528</b>  | 276 | 1806  | 524  | 218 |
| 1762  | 1734 | 208 | <b>1597</b>  | 648  | 1207  | 904  | 211 | <b>5583</b>  | 2296 | 1366  | 2055 | 191 | <b>3391</b>  | 1138 | 1958  | 1723 | 205 | <b>1176</b>  | 394 | 1072  | 673  | 210 |
| 16756 | 1574 | 205 | <b>18831</b> | 581  | 22268 | 957  | 210 | <b>29818</b> | 3025 | 25485 | 4013 | 208 | <b>20797</b> | 749  | 20727 | 986  | 206 | <b>21926</b> | 445 | 23938 | 857  | 210 |
| 12154 | 1848 | 209 | <b>17985</b> | 745  | 15976 | 1085 | 203 | <b>22432</b> | 1293 | 22309 | 1557 | 204 | <b>13633</b> | 1409 | 13773 | 1659 | 201 | <b>13847</b> | 611 | 15347 | 1145 | 209 |
| 19732 | 2803 | 209 | <b>33994</b> | 847  | 25376 | 1241 | 207 | <b>35180</b> | 1292 | 25948 | 1677 | 205 | <b>32720</b> | 1206 | 21253 | 1760 | 205 | <b>31717</b> | 527 | 26636 | 925  | 210 |
| 13405 | 2053 | 204 | <b>10164</b> | 433  | 10568 | 773  | 211 | <b>15003</b> | 615  | 19560 | 1080 | 214 | <b>15057</b> | 1115 | 16035 | 2010 | 212 | <b>17838</b> | 475 | 22187 | 876  | 210 |
| 2027  | 1686 | 210 | <b>1522</b>  | 534  | 1367  | 900  | 207 | <b>2824</b>  | 1106 | 1863  | 1696 | 205 | <b>2272</b>  | 625  | 2024  | 1014 | 213 | <b>1628</b>  | 549 | 1603  | 1113 | 211 |
| 1718  | 1746 | 207 | <b>1751</b>  | 397  | 1560  | 560  | 202 | <b>3858</b>  | 1549 | 1744  | 2053 | 202 | <b>2529</b>  | 825  | 1581  | 1255 | 205 | <b>1301</b>  | 457 | 1306  | 899  | 210 |
| 1567  | 1141 | 207 | <b>965</b>   | 335  | 1115  | 632  | 207 | <b>2625</b>  | 1100 | 1429  | 1586 | 205 | <b>3052</b>  | 1074 | 2011  | 1825 | 204 | <b>1521</b>  | 644 | 1481  | 1055 | 205 |
| 2117  | 1157 | 211 | <b>1052</b>  | 197  | 1158  | 657  | 209 | <b>1656</b>  | 983  | 1601  | 1639 | 211 | <b>2779</b>  | 849  | 1978  | 1184 | 205 | <b>1798</b>  | 732 | 1516  | 1045 | 208 |
| 1844  | 1201 | 210 | <b>944</b>   | 329  | 1133  | 689  | 212 | <b>2245</b>  | 915  | 1725  | 1295 | 210 | <b>2968</b>  | 1353 | 1667  | 1874 | 204 | <b>1121</b>  | 491 | 1138  | 863  | 207 |
| 2854  | 1524 | 202 | <b>2634</b>  | 785  | 2328  | 1280 | 206 | <b>3709</b>  | 1012 | 4196  | 1552 | 204 | <b>3290</b>  | 748  | 2817  | 1214 | 206 | <b>2081</b>  | 421 | 2442  | 769  | 209 |
| 1982  | 1721 | 202 | <b>954</b>   | 613  | 923   | 910  | 210 | <b>1903</b>  | 680  | 1501  | 970  | 202 | <b>1847</b>  | 673  | 1694  | 1114 | 206 | <b>1036</b>  | 341 | 1160  | 643  | 210 |
| 1941  | 2285 | 207 | <b>1392</b>  | 414  | 1323  | 646  | 209 | <b>2131</b>  | 942  | 1624  | 1362 | 207 | <b>1778</b>  | 702  | 1510  | 1247 | 209 | <b>1176</b>  | 519 | 1294  | 1119 | 208 |
| 1611  | 1502 | 207 | <b>1282</b>  | 528  | 1158  | 809  | 210 | <b>2070</b>  | 998  | 1539  | 1473 | 205 | <b>1991</b>  | 479  | 1721  | 818  | 207 | <b>1122</b>  | 370 | 1156  | 677  | 211 |
| 1578  | 1301 | 208 | <b>1114</b>  | 365  | 1234  | 725  | 205 | <b>2293</b>  | 914  | 2077  | 1501 | 202 | <b>2098</b>  | 539  | 1733  | 804  | 207 | <b>1116</b>  | 436 | 1268  | 685  | 204 |
| 1494  | 1090 | 205 | <b>979</b>   | 529  | 911   | 961  | 209 | <b>2015</b>  | 777  | 1831  | 1230 | 209 | <b>2280</b>  | 716  | 1429  | 1028 | 205 | <b>1106</b>  | 293 | 1093  | 526  | 203 |
| 1368  | 1171 | 208 | <b>974</b>   | 474  | 1005  | 1122 | 208 | <b>1564</b>  | 701  | 1472  | 1113 | 209 | <b>2202</b>  | 980  | 1449  | 1387 | 208 | <b>1034</b>  | 347 | 1141  | 735  | 214 |
| 1801  | 1330 | 210 | <b>1115</b>  | 463  | 1467  | 1179 | 209 | <b>1882</b>  | 730  | 1682  | 1115 | 202 | <b>1609</b>  | 847  | 1612  | 1567 | 206 | <b>1179</b>  | 493 | 1233  | 919  | 207 |
| 1357  | 1035 | 206 | <b>826</b>   | 170  | 940   | 394  | 208 | <b>1604</b>  | 550  | 1460  | 957  | 204 | <b>2691</b>  | 1100 | 1764  | 1849 | 197 | <b>988</b>   | 319 | 1133  | 715  | 210 |
| 7240  | 1605 | 204 | <b>8584</b>  | 861  | 8870  | 1730 | 208 | <b>11990</b> | 1255 | 15942 | 1789 | 207 | <b>6851</b>  | 1063 | 8118  | 1335 | 209 | <b>6408</b>  | 521 | 6664  | 932  | 206 |
| 1613  | 1726 | 196 | <b>2413</b>  | 939  | 2101  | 1294 | 207 | <b>3434</b>  | 1190 | 1634  | 1408 | 207 | <b>4932</b>  | 1870 | 2359  | 2769 | 203 | <b>1777</b>  | 714 | 1468  | 1066 | 206 |
| 2160  | 1437 | 208 | <b>2121</b>  | 781  | 1228  | 1029 | 202 | <b>3833</b>  | 1471 | 1793  | 1815 | 201 | <b>3198</b>  | 1001 | 2063  | 1544 | 207 | <b>1886</b>  | 718 | 1506  | 984  | 205 |
| 2168  | 1626 | 209 | <b>2649</b>  | 590  | 1912  | 771  | 205 | <b>4491</b>  | 1231 | 3463  | 1778 | 210 | <b>3514</b>  | 886  | 2453  | 1185 | 208 | <b>1884</b>  | 439 | 1781  | 774  | 210 |
| 3936  | 2284 | 201 | <b>4910</b>  | 946  | 3873  | 1249 | 202 | <b>6144</b>  | 1381 | 6418  | 1792 | 205 | <b>6160</b>  | 1268 | 5634  | 1542 | 205 | <b>4550</b>  | 472 | 4781  | 869  | 206 |
| 1751  | 1668 | 209 | <b>1855</b>  | 701  | 1211  | 911  | 209 | <b>6717</b>  | 2195 | 2400  | 1993 | 156 | <b>2946</b>  | 883  | 1928  | 1422 | 208 | <b>1128</b>  | 493 | 1286  | 897  | 212 |
| 17824 | 1434 | 207 | <b>19691</b> | 593  | 21971 | 850  | 210 | <b>20418</b> | 2364 | 22459 | 2778 | 207 | <b>15845</b> | 949  | 19913 | 1407 | 212 | <b>17094</b> | 505 | 20982 | 714  | 209 |
| 2025  | 1939 | 209 | <b>2138</b>  | 658  | 1641  | 860  | 208 | <b>3897</b>  | 1261 | 2827  | 1878 | 210 | <b>2421</b>  | 1048 | 1969  | 2210 | 209 | <b>1626</b>  | 485 | 1471  | 872  | 207 |
| 2793  | 1869 | 209 | <b>2515</b>  | 630  | 2203  | 1031 | 207 | <b>3637</b>  | 1287 | 3007  | 2105 | 210 | <b>3303</b>  | 1038 | 2866  | 1565 | 209 | <b>2514</b>  | 647 | 2328  | 1149 | 206 |
| 2989  | 1571 | 206 | <b>3540</b>  | 520  | 2839  | 855  | 207 | <b>5530</b>  | 766  | 6062  | 1337 | 211 | <b>4170</b>  | 1161 | 3292  | 1679 | 209 | <b>3122</b>  | 577 | 2756  | 879  | 205 |
| 1695  | 1218 | 205 | <b>2012</b>  | 785  | 1300  | 1060 | 205 | <b>2338</b>  | 1137 | 1784  | 2023 | 207 | <b>2430</b>  | 1343 | 2186  | 2349 | 208 | <b>1228</b>  | 522 | 1189  | 964  | 209 |
| 1991  | 1529 | 206 | <b>1830</b>  |      |       |      |     |              |      |       |      |     |              |      |       |      |     |              |     |       |      |     |

|       |      |     |       |      |       |      |     |       |      |       |      |     |      |      |       |      |     |       |     |       |      |     |
|-------|------|-----|-------|------|-------|------|-----|-------|------|-------|------|-----|------|------|-------|------|-----|-------|-----|-------|------|-----|
| 3415  | 1119 | 211 | 5155  | 368  | 8473  | 900  | 209 | 4357  | 586  | 6127  | 1020 | 208 | 2866 | 839  | 2704  | 1459 | 210 | 2419  | 248 | 2681  | 575  | 204 |
| 1592  | 1491 | 206 | 1474  | 503  | 3439  | 1027 | 205 | 1518  | 541  | 1557  | 1224 | 211 | 2182 | 842  | 1838  | 1459 | 209 | 1375  | 467 | 1474  | 999  | 210 |
| 1892  | 946  | 211 | 1076  | 311  | 1331  | 567  | 207 | 1747  | 1104 | 2301  | 3662 | 209 | 2121 | 733  | 1523  | 1138 | 210 | 1181  | 351 | 1082  | 655  | 206 |
| 7874  | 1277 | 208 | 5140  | 307  | 8465  | 614  | 211 | 3035  | 440  | 5543  | 864  | 211 | 4994 | 1056 | 5701  | 1558 | 208 | 7588  | 360 | 12045 | 623  | 207 |
| 1944  | 1004 | 213 | 1038  | 462  | 1084  | 827  | 209 | 2342  | 716  | 3924  | 1124 | 208 | 2349 | 564  | 1882  | 738  | 205 | 1327  | 433 | 1359  | 735  | 207 |
| 1439  | 892  | 210 | 1038  | 305  | 1242  | 541  | 207 | 2011  | 841  | 1305  | 1354 | 208 | 2280 | 786  | 1719  | 1265 | 207 | 1398  | 462 | 1454  | 834  | 204 |
| 1799  | 1575 | 209 | 1184  | 489  | 1177  | 995  | 209 | 1911  | 736  | 1674  | 1272 | 209 | 2212 | 1013 | 1577  | 1637 | 203 | 1322  | 454 | 1338  | 1048 | 207 |
| 3076  | 1139 | 207 | 3494  | 683  | 3550  | 1260 | 208 | 2361  | 701  | 2834  | 1609 | 211 | 3118 | 701  | 2617  | 1066 | 206 | 2616  | 636 | 1126  | 1120 | 203 |
| 1662  | 1216 | 209 | 1363  | 520  | 1208  | 840  | 203 | 1931  | 984  | 1687  | 1540 | 208 | 2366 | 852  | 1402  | 1166 | 210 | 1236  | 288 | 1329  | 503  | 210 |
| 2085  | 1535 | 209 | 1153  | 340  | 1277  | 588  | 209 | 1568  | 601  | 1489  | 1071 | 207 | 2362 | 965  | 1622  | 1561 | 208 | 1392  | 410 | 1450  | 704  | 207 |
| 1805  | 1169 | 208 | 1234  | 374  | 1331  | 715  | 209 | 1616  | 639  | 1332  | 1041 | 206 | 2598 | 719  | 1908  | 1399 | 211 | 1467  | 489 | 1387  | 786  | 208 |
| 1616  | 1727 | 210 | 1348  | 455  | 1229  | 924  | 211 | 1867  | 746  | 1564  | 1204 | 205 | 2030 | 1158 | 1475  | 2063 | 209 | 1543  | 506 | 1347  | 731  | 207 |
| 1965  | 1397 | 210 | 1489  | 537  | 1416  | 1078 | 210 | 1584  | 556  | 1366  | 977  | 207 | 2617 | 1109 | 2126  | 1948 | 203 | 1456  | 475 | 1447  | 861  | 206 |
| 1869  | 1175 | 206 | 1631  | 768  | 1449  | 1278 | 208 | 1246  | 395  | 1326  | 909  | 209 | 2495 | 904  | 1826  | 1312 | 209 | 1254  | 581 | 997   | 976  | 207 |
| 1698  | 1191 | 205 | 1898  | 931  | 1283  | 1398 | 206 | 2302  | 631  | 6942  | 1222 | 211 | 2120 | 1137 | 1679  | 2033 | 207 | 1431  | 697 | 1045  | 1014 | 202 |
| 1541  | 1166 | 210 | 1581  | 1132 | 1131  | 2499 | 209 | 1526  | 633  | 1670  | 1129 | 208 | 2332 | 1097 | 1642  | 2947 | 210 | 1033  | 471 | 1126  | 936  | 210 |
| 1916  | 1309 | 210 | 2496  | 991  | 1427  | 1851 | 206 | 1856  | 624  | 1429  | 992  | 206 | 1994 | 678  | 1540  | 1071 | 211 | 1269  | 543 | 994   | 956  | 207 |
| 1931  | 1012 | 201 | 1941  | 666  | 1493  | 1038 | 208 | 1519  | 837  | 1364  | 1394 | 208 | 2684 | 939  | 1683  | 1203 | 205 | 1244  | 417 | 1569  | 837  | 206 |
| 4361  | 1341 | 211 | 4244  | 546  | 5077  | 948  | 205 | 7705  | 719  | 9390  | 1711 | 206 | 3874 | 706  | 4836  | 1171 | 208 | 3147  | 359 | 4220  | 726  | 211 |
| 1512  | 1418 | 209 | 1282  | 584  | 1169  | 938  | 207 | 1631  | 680  | 1798  | 1657 | 209 | 2114 | 888  | 1979  | 2066 | 206 | 1267  | 313 | 1475  | 694  | 210 |
| 1765  | 1441 | 206 | 1052  | 388  | 1438  | 1007 | 209 | 2208  | 860  | 1809  | 1521 | 206 | 1976 | 951  | 1680  | 1600 | 206 | 1218  | 491 | 1125  | 951  | 207 |
| 2787  | 1566 | 206 | 4420  | 387  | 5905  | 728  | 201 | 5952  | 671  | 8011  | 1407 | 207 | 3279 | 647  | 2877  | 929  | 208 | 3701  | 421 | 4667  | 737  | 208 |
| 1566  | 2015 | 205 | 905   | 398  | 954   | 807  | 206 | 1208  | 367  | 1498  | 776  | 211 | 2342 | 883  | 1918  | 1637 | 208 | 1060  | 340 | 998   | 599  | 207 |
| 1655  | 1436 | 204 | 1139  | 327  | 1321  | 554  | 206 | 1247  | 405  | 1429  | 883  | 212 | 2811 | 1001 | 1782  | 1719 | 203 | 1270  | 397 | 1321  | 731  | 208 |
| 13391 | 1589 | 212 | 14449 | 394  | 18856 | 729  | 209 | 11628 | 512  | 17032 | 1015 | 209 | 9723 | 903  | 9610  | 1339 | 201 | 15193 | 521 | 20446 | 1048 | 209 |
| 2077  | 1696 | 206 | 2157  | 390  | 2183  | 536  | 198 | 2826  | 517  | 4482  | 1087 | 212 | 2701 | 929  | 2244  | 1363 | 206 | 2645  | 522 | 2718  | 991  | 199 |
| 2478  | 1563 | 207 | 1382  | 497  | 1480  | 844  | 210 | 2730  | 755  | 2665  | 1081 | 202 | 2391 | 633  | 1789  | 990  | 206 | 2538  | 206 | 3212  | 539  | 208 |
| 7849  | 1369 | 208 | 5166  | 263  | 6839  | 571  | 206 | 6280  | 819  | 9121  | 1376 | 205 | 3922 | 637  | 4041  | 1182 | 210 | 10797 | 333 | 15577 | 709  | 209 |
| 1502  | 1793 | 209 | 1241  | 468  | 1276  | 804  | 206 | 1883  | 784  | 1502  | 1311 | 204 | 1829 | 640  | 1617  | 1119 | 209 | 1165  | 363 | 1181  | 741  | 209 |
| 11719 | 1015 | 212 | 8209  | 378  | 12743 | 712  | 210 | 13179 | 448  | 18447 | 833  | 209 | 6349 | 940  | 6848  | 1646 | 206 | 9201  | 376 | 13435 | 940  | 210 |
| 2142  | 1119 | 212 | 1777  | 476  | 1997  | 896  | 210 | 2258  | 632  | 2267  | 1117 | 204 | 2598 | 1316 | 1981  | 2457 | 207 | 1860  | 639 | 1525  | 1007 | 206 |
| 1542  | 1802 | 202 | 989   | 376  | 1041  | 817  | 212 | 1520  | 401  | 1528  | 781  | 210 | 2046 | 936  | 1869  | 1937 | 208 | 1491  | 738 | 1101  | 1054 | 206 |
| 1800  | 1739 | 202 | 1417  | 549  | 1467  | 952  | 211 | 1777  | 739  | 1749  | 1344 | 208 | 2627 | 1053 | 1896  | 1599 | 207 | 1139  | 349 | 1199  | 833  | 208 |
| 4067  | 1764 | 207 | 1391  | 571  | 1161  | 952  | 207 | 2075  | 820  | 1692  | 1274 | 202 | 2438 | 723  | 1545  | 969  | 203 | 1522  | 351 | 1442  | 643  | 206 |
| 1835  | 1783 | 209 | 2139  | 776  | 1705  | 1656 | 204 | 2356  | 816  | 1746  | 1209 | 201 | 2301 | 636  | 1809  | 903  | 207 | 1456  | 499 | 1286  | 700  | 210 |
| 1350  | 2104 | 208 | 1652  | 730  | 1211  | 1203 | 205 | 1241  | 543  | 1357  | 1409 | 211 | 2402 | 957  | 1560  | 1388 | 210 | 1538  | 713 | 1200  | 1388 | 207 |
| 1441  | 886  | 211 | 1810  | 798  | 1346  | 1325 | 201 | 1590  | 639  | 1395  | 1178 | 210 | 2876 | 1058 | 1431  | 1497 | 205 | 1307  | 355 | 1294  | 638  | 210 |
| 1450  | 1405 | 209 | 1727  | 709  | 1193  | 1279 | 203 | 2013  | 976  | 1483  | 1473 | 208 | 2324 | 885  | 1551  | 1348 | 207 | 1257  | 492 | 1021  | 803  | 204 |
| 1998  | 1321 | 204 | 1801  | 624  | 1136  | 935  | 209 | 1514  | 485  | 1607  | 872  | 209 | 2844 | 1285 | 1726  | 2067 | 207 | 1643  | 681 | 979   | 1042 | 202 |
| 1596  | 1872 | 206 | 1557  | 680  | 1906  | 1138 | 208 | 2389  | 776  | 1391  | 1237 | 201 | 2601 | 879  | 1594  | 1297 | 208 | 1130  | 423 | 1293  | 839  | 210 |
| 1676  | 902  | 212 | 2054  | 783  | 1243  | 992  | 197 | 1912  | 681  | 1774  | 1000 | 210 | 2434 | 1310 | 1700  | 2152 | 208 | 1206  | 290 | 2112  | 556  | 210 |
| 1541  | 1495 | 204 | 2296  | 762  | 1318  | 965  | 205 | 1535  | 534  | 1587  | 946  | 210 | 2272 | 835  | 1674  | 1424 | 205 | 1539  | 605 | 4417  | 1033 | 206 |
| 3207  | 1229 | 211 | 3089  | 364  | 4451  | 629  | 206 | 5387  | 1124 | 5626  | 2035 | 204 | 3127 | 1025 | 2789  | 1587 | 205 | 1893  | 551 | 2273  | 1358 | 209 |
| 1739  | 1274 | 211 | 1393  | 458  | 2209  | 775  | 203 | 2635  | 977  | 2243  | 1832 | 206 | 2894 | 704  | 2138  | 1041 | 206 | 1415  | 443 | 1658  | 881  | 212 |
| 1536  | 1342 | 202 | 941   | 342  | 1312  | 734  | 210 | 1283  | 601  | 1527  | 1228 | 209 | 2477 | 864  | 1764  | 1265 | 204 | 1358  | 482 | 1317  | 875  | 205 |
| 1582  | 1407 | 201 | 1005  | 282  | 1084  | 497  | 210 | 1415  | 729  | 1466  | 1396 | 208 | 2902 | 777  | 1678  | 1102 | 201 | 1400  | 521 | 1468  | 1062 | 211 |
| 1726  | 1208 | 204 | 918   | 265  | 860   | 540  | 209 | 2113  | 672  | 1368  | 1131 | 205 | 2741 | 1333 | 1652  | 2013 | 200 | 1287  | 479 | 1228  | 846  | 210 |
| 1723  | 1658 | 210 | 1068  | 631  | 1099  | 1569 | 208 | 1767  | 609  | 1545  | 1137 | 207 | 2337 | 677  | 1899  | 1130 | 209 | 1315  | 611 | 1330  | 956  | 207 |
| 12200 | 1321 | 209 | 7288  | 243  | 9353  | 590  | 208 | 11409 | 820  | 17400 | 1301 | 210 | 7742 | 675  | 9984  | 1139 | 210 | 4565  | 398 | 6459  | 661  | 204 |
| 13405 | 954  | 198 | 6031  | 263  | 9624  | 540  | 208 | 11508 | 928  | 16174 | 1442 | 204 | 6989 | 610  | 10196 | 1025 | 210 | 4992  | 473 | 8590  | 910  | 211 |
| 1547  | 1512 | 206 | 2030  | 678  | 3195  | 1036 | 196 | 2132  | 906  | 1650  | 1193 | 205 | 1856 | 555  | 1713  | 1047 | 210 | 1390  | 600 | 1136  | 934  | 209 |
| 1573  | 1700 | 205 | 835   | 338  | 1239  | 749  | 202 | 1805  | 718  | 1466  | 1146 | 207 | 1986 | 629  | 1473  | 1014 | 208 | 1303  | 535 | 1325  | 1410 | 204 |
| 1445  | 1139 | 204 | 1284  | 488  | 1141  | 773  | 207 | 1428  | 695  | 1554  | 1472 | 210 | 1677 | 315  | 1757  | 576  | 213 | 1189  | 377 | 1225  | 694  | 211 |
| 1620  | 1019 | 206 | 1144  | 595  | 1026  | 958  | 208 | 1158  | 499  | 1517  | 1171 | 207 | 1792 | 666  | 1647  | 1150 | 209 | 1190  | 535 | 1140  | 1009 | 209 |
| 2425  | 1682 | 204 | 1732  | 713  | 2598  | 1172 | 211 | 2036  | 858  | 2171  | 1400 | 209 | 1981 | 835  | 1778  | 1552 | 210 | 1203  | 465 | 1466  | 857  | 210 |
| 1743  | 1245 | 204 | 2052  | 583  | 2308  | 912  | 204 | 1740  | 350  | 4384  | 645  | 210 | 2062 | 1019 | 1810  | 1744 | 209 | 914   | 290 | 970   | 804  | 210 |
| 1633  | 1542 | 207 | 926   | 359  | 978   | 722  | 210 | 1474  | 669  | 1806  | 1454 | 212 | 2513 | 1124 | 1675  | 1593 | 209 | 1770  | 560 | 1528  | 944  | 209 |
| 1869  | 977  | 212 | 1181  | 429  | 1055  | 801  | 207 | 1333  | 383  | 1430  | 1165 | 210 | 2555 | 891  | 1685  | 1329 | 207 | 1419  | 632 | 1272  | 1027 | 209 |
| 1816  | 1160 | 205 | 1494  | 507  | 1348  | 839  | 203 | 1487  | 807  | 1324  | 1366 | 212 | 1990 | 609  | 1951  | 1339 | 209 | 1596  | 427 | 1464  | 704  | 205 |
| 1400  | 1410 | 202 | 1701  | 634  | 1361  | 1200 | 204 | 1393  | 933  | 1445  | 1687 | 209 | 1929 | 885  | 1555  | 1563 | 210 | 1218  | 506 | 1108  | 820  | 205 |
| 1800  | 1263 | 205 | 1320  | 538  | 1168  | 1028 | 207 | 1594  | 670  | 1549  | 1291 | 209 | 2754 | 849  | 1654  | 1104 | 208 | 1096  | 415 | 1310  | 740  | 210 |
| 1904  | 1263 | 207 | 1450  | 435  | 32    |      |     |       |      |       |      |     |      |      |       |      |     |       |     |       |      |     |

|       |      |     |              |     |       |      |     |              |      |       |      |     |              |      |       |      |     |              |     |       |      |     |
|-------|------|-----|--------------|-----|-------|------|-----|--------------|------|-------|------|-----|--------------|------|-------|------|-----|--------------|-----|-------|------|-----|
| 10272 | 1889 | 213 | <b>4757</b>  | 237 | 6523  | 483  | 207 | <b>8602</b>  | 862  | 12512 | 1530 | 204 | <b>6244</b>  | 1177 | 9737  | 1961 | 210 | <b>2865</b>  | 408 | 4996  | 780  | 205 |
| 3029  | 1786 | 211 | <b>1998</b>  | 476 | 2693  | 958  | 209 | <b>3297</b>  | 911  | 4354  | 1690 | 211 | <b>3135</b>  | 901  | 3405  | 1293 | 210 | <b>1775</b>  | 507 | 2059  | 959  | 205 |
| 2131  | 805  | 210 | <b>1223</b>  | 377 | 1441  | 709  | 210 | <b>2883</b>  | 862  | 3035  | 1232 | 207 | <b>2208</b>  | 628  | 2359  | 1205 | 208 | <b>1383</b>  | 421 | 1346  | 730  | 208 |
| 1619  | 1664 | 211 | <b>949</b>   | 406 | 1082  | 807  | 208 | <b>2032</b>  | 693  | 3227  | 1058 | 205 | <b>2124</b>  | 754  | 1634  | 1265 | 203 | <b>1370</b>  | 580 | 1091  | 867  | 205 |
| 1945  | 1372 | 207 | <b>1178</b>  | 403 | 1324  | 769  | 205 | <b>1720</b>  | 536  | 1511  | 807  | 206 | <b>2116</b>  | 761  | 2004  | 1329 | 209 | <b>1421</b>  | 576 | 1394  | 942  | 210 |
| 1788  | 1419 | 205 | <b>1654</b>  | 321 | 1916  | 1082 | 208 | <b>1436</b>  | 613  | 1308  | 1255 | 210 | <b>2134</b>  | 852  | 1711  | 1420 | 204 | <b>930</b>   | 447 | 892   | 784  | 208 |
| 1657  | 994  | 199 | <b>1040</b>  | 646 | 1216  | 783  | 207 | <b>2009</b>  | 782  | 1537  | 1264 | 206 | <b>1934</b>  | 820  | 1962  | 1410 | 206 | <b>1245</b>  | 524 | 1067  | 1102 | 207 |
| 3860  | 797  | 213 | <b>3043</b>  | 495 | 3162  | 896  | 208 | <b>4793</b>  | 816  | 6343  | 1439 | 208 | <b>4701</b>  | 940  | 4795  | 1616 | 200 | <b>2032</b>  | 407 | 2406  | 573  | 207 |
| 1959  | 616  | 211 | <b>1139</b>  | 418 | 1294  | 723  | 204 | <b>1735</b>  | 789  | 2074  | 1263 | 207 | <b>2375</b>  | 823  | 2266  | 1332 | 204 | <b>1105</b>  | 483 | 1112  | 949  | 207 |
| 1779  | 969  | 205 | <b>878</b>   | 322 | 1039  | 647  | 206 | <b>1513</b>  | 640  | 1853  | 1051 | 208 | <b>1507</b>  | 731  | 1522  | 1414 | 209 | <b>1181</b>  | 468 | 1018  | 803  | 206 |
| 1394  | 1516 | 210 | <b>977</b>   | 260 | 1409  | 570  | 206 | <b>1721</b>  | 787  | 1649  | 1516 | 208 | <b>2257</b>  | 798  | 1609  | 1259 | 207 | <b>1030</b>  | 348 | 1125  | 1096 | 207 |
| 1563  | 939  | 204 | <b>910</b>   | 267 | 1058  | 722  | 207 | <b>1213</b>  | 514  | 1511  | 994  | 206 | <b>1941</b>  | 663  | 1630  | 1117 | 201 | <b>877</b>   | 425 | 1050  | 899  | 208 |
| 1481  | 1396 | 208 | <b>898</b>   | 235 | 1309  | 500  | 209 | <b>1481</b>  | 630  | 1852  | 1211 | 208 | <b>1664</b>  | 626  | 1690  | 1056 | 207 | <b>962</b>   | 433 | 1093  | 831  | 210 |
| 1424  | 1201 | 211 | <b>958</b>   | 379 | 1087  | 1073 | 209 | <b>1422</b>  | 378  | 1424  | 729  | 211 | <b>1722</b>  | 864  | 1552  | 1504 | 209 | <b>819</b>   | 408 | 884   | 778  | 206 |
| 2025  | 999  | 207 | <b>867</b>   | 430 | 929   | 842  | 209 | <b>1687</b>  | 781  | 1517  | 1418 | 205 | <b>3198</b>  | 1372 | 1952  | 1814 | 192 | <b>1123</b>  | 523 | 899   | 897  | 203 |
| 1691  | 910  | 211 | <b>946</b>   | 304 | 1298  | 619  | 203 | <b>2785</b>  | 893  | 1313  | 1142 | 197 | <b>2199</b>  | 812  | 2080  | 1129 | 205 | <b>1377</b>  | 380 | 1345  | 612  | 209 |
| 1592  | 1360 | 210 | <b>1009</b>  | 416 | 925   | 720  | 202 | <b>1631</b>  | 510  | 1812  | 798  | 210 | <b>2732</b>  | 902  | 1653  | 1179 | 202 | <b>1099</b>  | 265 | 1138  | 589  | 211 |
| 2146  | 1861 | 203 | <b>983</b>   | 377 | 2055  | 965  | 207 | <b>1251</b>  | 710  | 1450  | 1393 | 210 | <b>2036</b>  | 930  | 2316  | 1380 | 210 | <b>1379</b>  | 406 | 1476  | 852  | 210 |
| 2104  | 1282 | 209 | <b>1271</b>  | 668 | 1603  | 1312 | 202 | <b>2209</b>  | 900  | 1632  | 1324 | 204 | <b>2514</b>  | 762  | 2075  | 1176 | 210 | <b>1677</b>  | 547 | 2163  | 969  | 207 |
| 1594  | 1785 | 205 | <b>1114</b>  | 522 | 1022  | 943  | 206 | <b>1696</b>  | 618  | 1547  | 931  | 210 | <b>2061</b>  | 748  | 1968  | 1175 | 208 | <b>1236</b>  | 443 | 993   | 729  | 209 |
| 10509 | 840  | 206 | <b>6190</b>  | 322 | 8994  | 721  | 208 | <b>5636</b>  | 838  | 8165  | 1698 | 206 | <b>6998</b>  | 657  | 9128  | 993  | 207 | <b>4839</b>  | 447 | 5299  | 707  | 209 |
| 2826  | 1104 | 209 | <b>1444</b>  | 275 | 1567  | 769  | 205 | <b>2566</b>  | 655  | 3185  | 1028 | 210 | <b>2367</b>  | 655  | 2685  | 997  | 208 | <b>1080</b>  | 478 | 1074  | 969  | 209 |
| 1670  | 981  | 210 | <b>1113</b>  | 427 | 1448  | 779  | 205 | <b>1933</b>  | 636  | 1668  | 1064 | 206 | <b>2125</b>  | 776  | 1712  | 1354 | 204 | <b>1253</b>  | 565 | 1240  | 1060 | 206 |
| 1641  | 1242 | 206 | <b>1124</b>  | 381 | 1618  | 691  | 208 | <b>2507</b>  | 730  | 1830  | 1219 | 202 | <b>2054</b>  | 914  | 1319  | 1471 | 210 | <b>957</b>   | 363 | 1044  | 617  | 208 |
| 1359  | 1087 | 210 | <b>823</b>   | 384 | 896   | 718  | 206 | <b>2177</b>  | 736  | 1609  | 1116 | 209 | <b>1905</b>  | 780  | 1693  | 1395 | 207 | <b>1272</b>  | 414 | 1332  | 732  | 204 |
| 2756  | 1396 | 203 | <b>842</b>   | 477 | 998   | 1210 | 203 | <b>1833</b>  | 723  | 1457  | 1180 | 206 | <b>1922</b>  | 660  | 1594  | 1037 | 206 | <b>1320</b>  | 403 | 1357  | 659  | 202 |
| 18798 | 1452 | 206 | <b>11946</b> | 391 | 14341 | 1371 | 209 | <b>17660</b> | 906  | 20110 | 1461 | 208 | <b>13481</b> | 586  | 19361 | 1004 | 211 | <b>10268</b> | 415 | 16591 | 737  | 211 |
| 1749  | 1826 | 196 | <b>1062</b>  | 246 | 1243  | 464  | 208 | <b>2020</b>  | 456  | 2386  | 1080 | 207 | <b>2320</b>  | 862  | 1680  | 1427 | 210 | <b>1197</b>  | 407 | 1255  | 738  | 212 |
| 2028  | 1238 | 210 | <b>822</b>   | 340 | 936   | 623  | 208 | <b>1387</b>  | 474  | 1568  | 1027 | 212 | <b>2185</b>  | 624  | 2001  | 1086 | 211 | <b>1232</b>  | 457 | 1341  | 763  | 208 |
| 1985  | 1170 | 211 | <b>1266</b>  | 462 | 1925  | 759  | 205 | <b>1379</b>  | 705  | 1487  | 1751 | 209 | <b>1775</b>  | 510  | 1926  | 942  | 209 | <b>1058</b>  | 305 | 1197  | 744  | 210 |
| 1589  | 985  | 206 | <b>883</b>   | 308 | 973   | 474  | 209 | <b>1633</b>  | 724  | 1431  | 1297 | 204 | <b>1813</b>  | 662  | 1649  | 1290 | 208 | <b>1085</b>  | 544 | 915   | 1189 | 208 |
| 1790  | 673  | 210 | <b>944</b>   | 362 | 1066  | 686  | 209 | <b>1859</b>  | 1158 | 1382  | 1740 | 205 | <b>1338</b>  | 861  | 1418  | 1865 | 211 | <b>1599</b>  | 733 | 1190  | 1311 | 206 |
| 2013  | 865  | 211 | <b>924</b>   | 317 | 1039  | 703  | 204 | <b>2146</b>  | 829  | 1642  | 1203 | 206 | <b>1742</b>  | 758  | 1864  | 1811 | 212 | <b>1039</b>  | 288 | 1136  | 602  | 210 |
| 1547  | 1019 | 207 | <b>967</b>   | 323 | 961   | 485  | 207 | <b>1652</b>  | 722  | 1609  | 1433 | 205 | <b>2383</b>  | 687  | 2200  | 1121 | 209 | <b>1162</b>  | 440 | 1142  | 931  | 210 |
| 2080  | 1399 | 209 | <b>970</b>   | 298 | 1418  | 710  | 207 | <b>1789</b>  | 808  | 1672  | 1383 | 208 | <b>1856</b>  | 743  | 1676  | 1363 | 206 | <b>972</b>   | 362 | 991   | 604  | 208 |
| 1486  | 1568 | 203 | <b>926</b>   | 327 | 1224  | 722  | 208 | <b>1581</b>  | 749  | 1622  | 1513 | 209 | <b>2322</b>  | 929  | 1874  | 1777 | 208 | <b>1133</b>  | 530 | 1525  | 910  | 207 |
| 1644  | 1604 | 209 | <b>1359</b>  | 498 | 2014  | 786  | 206 | <b>1346</b>  | 419  | 1651  | 1034 | 212 | <b>1424</b>  | 580  | 1574  | 1734 | 208 | <b>1143</b>  | 328 | 1071  | 502  | 209 |
| 1484  | 1139 | 209 | <b>935</b>   | 397 | 1549  | 748  | 210 | <b>1296</b>  | 625  | 1393  | 1018 | 209 | <b>1762</b>  | 845  | 1630  | 1309 | 209 | <b>915</b>   | 298 | 895   | 527  | 210 |
| 1629  | 1050 | 211 | <b>1048</b>  | 358 | 2055  | 739  | 207 | <b>1951</b>  | 469  | 1439  | 649  | 202 | <b>1996</b>  | 668  | 1792  | 1018 | 208 | <b>958</b>   | 578 | 1186  | 1349 | 206 |
| 3857  | 1106 | 210 | <b>3133</b>  | 101 | 4219  | 210  | 208 | <b>3476</b>  | 741  | 4044  | 1257 | 209 | <b>4045</b>  | 739  | 6140  | 1441 | 209 | <b>2786</b>  | 335 | 4222  | 593  | 211 |
| 17973 | 1367 | 207 | <b>20677</b> | 122 | 22599 | 607  | 209 | <b>19318</b> | 650  | 20879 | 1085 | 209 | <b>16707</b> | 656  | 18836 | 1093 | 207 | <b>7567</b>  | 519 | 9284  | 872  | 208 |
| 2241  | 1422 | 205 | <b>1713</b>  | 167 | 1896  | 382  | 208 | <b>3839</b>  | 622  | 4795  | 1052 | 212 | <b>2793</b>  | 783  | 2837  | 1515 | 210 | <b>2016</b>  | 509 | 2087  | 870  | 209 |
| 3814  | 1185 | 206 | <b>3166</b>  | 223 | 3790  | 510  | 212 | <b>5044</b>  | 607  | 7505  | 1161 | 206 | <b>4323</b>  | 975  | 4984  | 1582 | 210 | <b>2577</b>  | 433 | 3190  | 859  | 210 |
| 1984  | 1276 | 205 | <b>912</b>   | 382 | 933   | 721  | 208 | <b>2073</b>  | 818  | 1643  | 1310 | 206 | <b>2846</b>  | 1163 | 1571  | 1482 | 200 | <b>1051</b>  | 413 | 1076  | 915  | 209 |
| 1640  | 1054 | 205 | <b>812</b>   | 214 | 899   | 580  | 209 | <b>2589</b>  | 964  | 2064  | 1688 | 208 | <b>2104</b>  | 743  | 1787  | 1055 | 207 | <b>915</b>   | 417 | 1031  | 935  | 210 |
| 1439  | 1189 | 210 | <b>931</b>   | 699 | 987   | 4035 | 208 | <b>2167</b>  | 685  | 1743  | 1067 | 205 | <b>1684</b>  | 923  | 1419  | 1804 | 210 | <b>1067</b>  | 358 | 1077  | 587  | 205 |
| 1908  | 1001 | 206 | <b>850</b>   | 351 | 930   | 732  | 206 | <b>2027</b>  | 864  | 1343  | 1240 | 205 | <b>1857</b>  | 684  | 1653  | 1189 | 207 | <b>1144</b>  | 492 | 1073  | 935  | 207 |
| 1770  | 981  | 200 | <b>1238</b>  | 610 | 1302  | 1268 | 210 | <b>1862</b>  | 833  | 1439  | 1225 | 210 | <b>1610</b>  | 740  | 1965  | 1367 | 208 | <b>1043</b>  | 446 | 1135  | 943  | 207 |
| 1438  | 1085 | 202 | <b>849</b>   | 158 | 926   | 333  | 210 | <b>1984</b>  | 778  | 1698  | 1279 | 203 | <b>1531</b>  | 512  | 1355  | 897  | 208 | <b>1167</b>  | 513 | 1158  | 997  | 205 |
| 1836  | 1295 | 208 | <b>866</b>   | 208 | 947   | 549  | 205 | <b>2087</b>  | 652  | 1829  | 935  | 204 | <b>2128</b>  | 558  | 1573  | 905  | 202 | <b>959</b>   | 314 | 1111  | 621  | 208 |
| 2098  | 1473 | 210 | <b>896</b>   | 326 | 974   | 759  | 207 | <b>1999</b>  | 439  | 1807  | 669  | 207 | <b>2059</b>  | 630  | 1723  | 1050 | 210 | <b>970</b>   | 538 | 1022  | 1047 | 210 |
| 1559  | 1402 | 205 | <b>992</b>   | 454 | 1115  | 1419 | 208 | <b>1332</b>  | 530  | 1591  | 1492 | 211 | <b>2038</b>  | 544  | 1835  | 967  | 211 | <b>1318</b>  | 489 | 1242  | 728  | 206 |
| 1745  | 1682 | 210 | <b>1401</b>  | 713 | 2004  | 1567 | 210 | <b>1421</b>  | 359  | 1812  | 907  | 213 | <b>1912</b>  | 701  | 1522  | 1441 | 207 | <b>1892</b>  | 756 | 1161  | 1179 | 200 |
| 1578  | 1338 | 213 | <b>937</b>   | 202 | 1115  | 462  | 207 | <b>1412</b>  | 493  | 1683  | 965  | 212 | <b>1608</b>  | 980  | 1650  | 2494 | 210 | <b>973</b>   | 366 | 1204  | 964  | 207 |
| 2088  | 1121 | 213 | <b>817</b>   | 236 | 883   | 463  | 210 | <b>1988</b>  | 777  | 1767  | 1211 | 206 | <b>1575</b>  | 1051 | 1254  | 1858 | 210 | <b>920</b>   | 315 | 1089  | 798  | 208 |
| 1534  | 8826 | 210 | <b>850</b>   | 270 | 979   | 527  | 202 | <b>1402</b>  | 713  | 1707  | 1329 | 211 | <b>1593</b>  | 584  | 1627  | 1091 | 210 | <b>1153</b>  | 315 | 1206  | 608  | 209 |
| 11503 | 1233 | 208 | <b>8334</b>  | 267 | 11073 | 539  | 207 | <b>11061</b> | 692  | 17427 | 1118 | 207 | <b>10177</b> | 648  | 15970 | 1084 | 206 | <b>6121</b>  | 612 | 9685  | 1470 | 206 |
| 1685  | 1626 | 199 |              |     |       |      |     |              |      |       |      |     |              |      |       |      |     |              |     |       |      |     |



|       |      |     |       |     |       |      |     |       |      |       |      |     |       |      |       |      |     |      |     |       |      |     |
|-------|------|-----|-------|-----|-------|------|-----|-------|------|-------|------|-----|-------|------|-------|------|-----|------|-----|-------|------|-----|
| 1705  | 1267 | 212 | 1054  | 443 | 1237  | 889  | 209 | 1465  | 342  | 1684  | 609  | 211 | 1739  | 465  | 1596  | 801  | 209 | 1196 | 409 | 1296  | 783  | 203 |
| 3659  | 1254 | 207 | 2683  | 371 | 3269  | 634  | 206 | 4977  | 496  | 7052  | 878  | 208 | 3988  | 646  | 4207  | 1154 | 209 | 1800 | 619 | 2094  | 1229 | 208 |
| 1579  | 1031 | 207 | 1490  | 531 | 2191  | 894  | 205 | 1650  | 665  | 1983  | 1506 | 211 | 2078  | 638  | 1943  | 1030 | 210 | 1039 | 229 | 1114  | 589  | 207 |
| 1984  | 1631 | 206 | 872   | 311 | 1139  | 673  | 210 | 1331  | 678  | 1394  | 1547 | 210 | 1332  | 375  | 1654  | 943  | 210 | 936  | 306 | 1124  | 770  | 204 |
| 1642  | 1868 | 205 | 948   | 478 | 1028  | 1008 | 206 | 1932  | 954  | 1601  | 1441 | 207 | 1693  | 696  | 1777  | 1349 | 210 | 1297 | 472 | 1367  | 804  | 203 |
| 4082  | 1174 | 207 | 986   | 341 | 1873  | 866  | 207 | 2965  | 1006 | 1597  | 1202 | 194 | 1817  | 568  | 1606  | 959  | 209 | 1148 | 437 | 1085  | 831  | 207 |
| 2169  | 1377 | 208 | 1095  | 553 | 1751  | 929  | 206 | 2209  | 837  | 1491  | 1239 | 204 | 2131  | 873  | 1565  | 1353 | 206 | 995  | 301 | 1069  | 506  | 208 |
| 1497  | 4174 | 203 | 1377  | 645 | 1214  | 958  | 211 | 1890  | 599  | 1639  | 958  | 201 | 1707  | 1005 | 1571  | 1706 | 207 | 1388 | 562 | 1184  | 951  | 205 |
| 1636  | 1883 | 211 | 1180  | 545 | 1196  | 1021 | 202 | 1618  | 711  | 1407  | 1171 | 205 | 1767  | 291  | 1944  | 609  | 209 | 1069 | 442 | 1077  | 801  | 209 |
| 1939  | 964  | 212 | 772   | 356 | 976   | 745  | 209 | 2370  | 1006 | 1514  | 1601 | 206 | 1652  | 684  | 1524  | 1132 | 211 | 1501 | 509 | 1145  | 1050 | 209 |
| 1689  | 1497 | 207 | 922   | 288 | 1064  | 623  | 206 | 1702  | 592  | 1321  | 1123 | 209 | 1970  | 1089 | 1860  | 1842 | 210 | 1014 | 498 | 1168  | 1051 | 211 |
| 1736  | 2242 | 208 | 956   | 308 | 1180  | 606  | 205 | 1752  | 974  | 1950  | 1700 | 210 | 2001  | 705  | 1559  | 1102 | 209 | 1539 | 462 | 1296  | 754  | 205 |
| 1905  | 1782 | 211 | 1407  | 417 | 1431  | 844  | 204 | 1560  | 533  | 1955  | 1395 | 211 | 2520  | 582  | 2090  | 1104 | 208 | 1409 | 466 | 1513  | 973  | 209 |
| 1938  | 1635 | 210 | 968   | 351 | 1116  | 853  | 210 | 2465  | 1257 | 1543  | 1967 | 202 | 1995  | 477  | 1947  | 846  | 209 | 1181 | 447 | 1206  | 911  | 210 |
| 4293  | 1531 | 208 | 4673  | 378 | 5532  | 796  | 208 | 6097  | 986  | 8302  | 1670 | 204 | 5826  | 782  | 5505  | 1158 | 205 | 4213 | 561 | 5461  | 903  | 207 |
| 2058  | 1014 | 207 | 1296  | 245 | 1269  | 545  | 209 | 2696  | 781  | 2943  | 1259 | 209 | 2524  | 850  | 2142  | 1656 | 211 | 1300 | 474 | 1161  | 738  | 210 |
| 1503  | 1783 | 212 | 1047  | 241 | 1105  | 634  | 209 | 1947  | 639  | 1593  | 1007 | 208 | 1875  | 745  | 1730  | 1945 | 211 | 1157 | 431 | 1204  | 674  | 207 |
| 1875  | 1335 | 210 | 885   | 398 | 1028  | 838  | 211 | 1674  | 501  | 1308  | 832  | 209 | 2509  | 1080 | 1224  | 1629 | 188 | 994  | 416 | 1156  | 801  | 208 |
| 1718  | 1357 | 210 | 926   | 448 | 1403  | 799  | 207 | 1196  | 484  | 1458  | 1168 | 210 | 2424  | 989  | 1863  | 1357 | 209 | 1095 | 567 | 1066  | 1009 | 209 |
| 1790  | 1265 | 204 | 990   | 309 | 1067  | 589  | 205 | 1268  | 388  | 1595  | 171  | 211 | 1981  | 689  | 1461  | 962  | 204 | 1017 | 411 | 1066  | 746  | 207 |
| 14538 | 1112 | 210 | 12497 | 614 | 14935 | 1359 | 210 | 11240 | 704  | 16948 | 1185 | 205 | 15342 | 775  | 18262 | 1359 | 208 | 7284 | 315 | 11439 | 519  | 207 |
| 1993  | 1286 | 207 | 1060  | 494 | 1071  | 944  | 208 | 1851  | 453  | 1751  | 863  | 210 | 2616  | 788  | 1724  | 1179 | 204 | 1034 | 297 | 1360  | 589  | 210 |
| 1546  | 1085 | 207 | 946   | 359 | 1116  | 743  | 208 | 1795  | 691  | 1518  | 1077 | 207 | 2006  | 880  | 1671  | 1585 | 207 | 1106 | 365 | 1190  | 666  | 208 |
| 1435  | 896  | 209 | 835   | 327 | 1133  | 564  | 207 | 2571  | 1070 | 1355  | 1670 | 200 | 1833  | 453  | 1615  | 700  | 212 | 1183 | 665 | 1071  | 1074 | 205 |
| 1572  | 606  | 209 | 872   | 420 | 961   | 840  | 207 | 1240  | 356  | 1590  | 695  | 206 | 2274  | 730  | 2087  | 1618 | 209 | 1526 | 578 | 1301  | 997  | 202 |
| 1631  | 1856 | 208 | 937   | 435 | 1031  | 741  | 210 | 1064  | 363  | 1286  | 785  | 210 | 1795  | 564  | 1891  | 1085 | 208 | 950  | 561 | 1049  | 1211 | 210 |
| 1965  | 1833 | 206 | 1124  | 377 | 1941  | 708  | 210 | 1563  | 391  | 1905  | 716  | 210 | 1596  | 402  | 1499  | 772  | 210 | 1016 | 357 | 1176  | 614  | 212 |
| 1893  | 850  | 207 | 980   | 312 | 1077  | 697  | 206 | 2006  | 538  | 1957  | 835  | 210 | 2086  | 865  | 1885  | 1610 | 206 | 1001 | 360 | 1032  | 722  | 207 |
| 1749  | 1080 | 209 | 915   | 414 | 1438  | 958  | 207 | 1786  | 739  | 1518  | 1089 | 206 | 1593  | 829  | 1397  | 1490 | 210 | 933  | 407 | 893   | 786  | 209 |
| 1402  | 1188 | 203 | 1174  | 210 | 2610  | 645  | 205 | 2599  | 826  | 1999  | 1186 | 205 | 2351  | 911  | 1826  | 1750 | 205 | 1029 | 235 | 1339  | 544  | 209 |
| 1271  | 1440 | 207 | 1259  | 459 | 2277  | 769  | 206 | 1706  | 819  | 1720  | 1410 | 209 | 1839  | 690  | 1573  | 1199 | 208 | 1368 | 434 | 1631  | 822  | 211 |
| 1579  | 2035 | 201 | 950   | 494 | 1094  | 859  | 205 | 1444  | 612  | 1510  | 1467 | 209 | 1764  | 962  | 1692  | 1580 | 209 | 949  | 476 | 1023  | 864  | 208 |
| 1962  | 2061 | 209 | 1042  | 457 | 1549  | 848  | 206 | 1713  | 646  | 1716  | 1286 | 208 | 2462  | 987  | 1783  | 1579 | 206 | 1078 | 488 | 1085  | 806  | 209 |
| 4509  | 1060 | 210 | 6494  | 269 | 9185  | 488  | 209 | 4229  | 877  | 5334  | 1506 | 206 | 3363  | 694  | 4484  | 1531 | 209 | 2316 | 514 | 2492  | 1030 | 210 |
| 17538 | 972  | 205 | 20998 | 498 | 19594 | 1116 | 209 | 18509 | 740  | 19772 | 1420 | 212 | 12969 | 754  | 16721 | 1404 | 213 | 4836 | 424 | 4703  | 776  | 208 |
| 2675  | 1498 | 206 | 1700  | 289 | 1797  | 571  | 209 | 4217  | 984  | 4394  | 1682 | 209 | 2479  | 559  | 2468  | 1040 | 211 | 1588 | 422 | 1675  | 881  | 209 |
| 3270  | 1203 | 208 | 2745  | 380 | 2750  | 758  | 207 | 4457  | 605  | 6906  | 1099 | 212 | 3337  | 632  | 3956  | 1024 | 212 | 2603 | 414 | 2739  | 798  | 212 |
| 1937  | 1373 | 211 | 1240  | 388 | 1898  | 710  | 203 | 1495  | 648  | 1462  | 1217 | 212 | 1858  | 895  | 1446  | 1735 | 206 | 1222 | 776 | 1122  | 1429 | 208 |
| 1454  | 1660 | 203 | 863   | 257 | 1033  | 586  | 209 | 2116  | 919  | 1506  | 1261 | 206 | 1803  | 825  | 1612  | 1825 | 211 | 1711 | 843 | 1108  | 1189 | 202 |
| 1877  | 1118 | 205 | 919   | 258 | 1118  | 717  | 204 | 1301  | 445  | 1489  | 921  | 211 | 2047  | 579  | 1749  | 965  | 213 | 1240 | 374 | 958   | 610  | 205 |
| 1376  | 1352 | 206 | 942   | 314 | 1258  | 709  | 208 | 2014  | 841  | 1502  | 1287 | 206 | 2428  | 739  | 5391  | 1180 | 210 | 906  | 394 | 991   | 842  | 206 |
| 1504  | 934  | 201 | 1070  | 365 | 1395  | 822  | 210 | 1659  | 614  | 1692  | 1126 | 210 | 1991  | 781  | 1688  | 1025 | 207 | 1081 | 357 | 1188  | 686  | 210 |
| 1709  | 991  | 210 | 767   | 311 | 885   | 763  | 208 | 1534  | 467  | 1550  | 857  | 210 | 1899  | 485  | 1705  | 856  | 205 | 1012 | 510 | 1127  | 1016 | 209 |
| 1509  | 1471 | 208 | 904   | 337 | 996   | 695  | 206 | 1606  | 702  | 1374  | 1189 | 206 | 1800  | 563  | 1585  | 906  | 202 | 823  | 344 | 901   | 782  | 210 |
| 1982  | 1411 | 208 | 915   | 376 | 1019  | 745  | 206 | 1825  | 587  | 2701  | 1042 | 207 | 1512  | 493  | 1652  | 1107 | 213 | 1308 | 590 | 1235  | 1074 | 209 |
| 1781  | 1391 | 208 | 1464  | 564 | 945   | 1079 | 200 | 1741  | 742  | 1751  | 1488 | 207 | 2228  | 675  | 1952  | 939  | 207 | 1111 | 499 | 1454  | 913  | 208 |
| 1504  | 1050 | 210 | 1044  | 393 | 1123  | 710  | 209 | 2532  | 878  | 1595  | 985  | 201 | 1388  | 623  | 1385  | 1167 | 210 | 854  | 413 | 829   | 907  | 208 |
| 1704  | 1058 | 211 | 976   | 364 | 1419  | 683  | 206 | 1969  | 580  | 1774  | 886  | 209 | 2708  | 1024 | 1657  | 1483 | 205 | 1220 | 484 | 1039  | 789  | 207 |
| 1590  | 1077 | 208 | 876   | 337 | 988   | 765  | 210 | 1923  | 985  | 1597  | 1960 | 208 | 1792  | 751  | 1593  | 1569 | 211 | 1068 | 483 | 926   | 981  | 207 |
| 1861  | 1344 | 208 | 813   | 314 | 969   | 652  | 209 | 1600  | 659  | 1652  | 1712 | 209 | 2172  | 1096 | 1666  | 1538 | 209 | 931  | 368 | 990   | 779  | 209 |
| 11659 | 1589 | 205 | 7503  | 559 | 9121  | 909  | 208 | 11061 | 632  | 16606 | 981  | 206 | 10330 | 899  | 13936 | 1538 | 203 | 5144 | 524 | 8901  | 1012 | 208 |
| 1669  | 814  | 211 | 1341  | 292 | 3977  | 578  | 207 | 1785  | 1125 | 1527  | 2287 | 202 | 2277  | 767  | 1957  | 1097 | 204 | 928  | 449 | 1008  | 888  | 210 |
| 1743  | 953  | 207 | 1086  | 392 | 1388  | 789  | 211 | 1717  | 876  | 1641  | 1299 | 210 | 2018  | 704  | 1643  | 1115 | 210 | 1050 | 436 | 1108  | 831  | 207 |
| 1557  | 1414 | 210 | 1063  | 330 | 1171  | 789  | 209 | 1771  | 635  | 1685  | 1066 | 209 | 2223  | 959  | 1898  | 1378 | 203 | 944  | 335 | 1104  | 838  | 212 |
| 1578  | 949  | 210 | 1131  | 522 | 1617  | 1352 | 202 | 2185  | 654  | 1778  | 1050 | 204 | 2562  | 783  | 1590  | 1133 | 205 | 1023 | 629 | 1087  | 1543 | 210 |
| 1926  | 1595 | 209 | 889   | 574 | 1079  | 1449 | 208 | 1410  | 486  | 1450  | 1097 | 210 | 2464  | 1007 | 1790  | 1539 | 200 | 1220 | 426 | 1449  | 866  | 207 |
| 1895  | 1510 | 204 | 1156  | 369 | 2507  | 1059 | 209 | 1368  | 527  | 1312  | 1061 | 211 | 2174  | 689  | 1528  | 1041 | 208 | 1206 | 395 | 1228  | 742  | 205 |
| 2430  | 919  | 209 | 1321  | 490 | 1300  | 1065 | 207 | 2375  | 786  | 2429  | 1587 | 210 | 2464  | 876  | 2178  | 1387 | 205 | 1594 | 507 | 1326  | 761  | 208 |
| 1580  | 1007 | 209 | 933   | 427 | 1108  | 685  | 208 | 2553  | 809  | 1631  | 1203 | 206 | 2403  | 1051 | 1610  | 1546 | 207 | 1245 | 617 | 1235  | 1253 | 210 |
| 3611  | 734  | 212 | 2221  | 274 | 2270  | 549  | 208 | 3546  | 730  | 3495  | 1064 | 210 | 3363  | 747  | 4600  | 1193 | 209 | 1988 | 548 | 1829  | 840  | 205 |
| 1730  | 1486 | 203 | 857   | 356 | 933   | 678  | 209 | 1791  | 875  | 1736  | 1322 | 210 | 1812  | 652  | 1562  | 940  | 209 | 1417 | 625 | 1390  | 1074 | 207 |
| 3188  | 1775 | 212 | 2221  | 264 | 2347  | 550  | 208 | 2534  | 744  | 2573  | 1400 | 210 | 3073  | 5    |       |      |     |      |     |       |      |     |

1835 765 205 1184 542 1386 924 210 1680 578 1628 1088 208 2536 986 1568 1448 205 986 403 1045 691 211
1581 853 205 1154 340 1396 926 206 1421 466 1478 865 211 2650 958 1730 1434 205 1015 530 1074 1104 212
1696 1418 206 1227 359 1107 574 206 2362 706 2123 1088 197 2015 686 1778 1072 205 930 737 1013 1854 208
2588 1459 209 1287 283 1290 767 209 2132 961 1653 1715 202 2674 772 2170 1269 206 1248 550 959 988 205
1631 1343 209 995 408 1541 821 208 1887 728 1506 1098 207 1762 718 1728 1308 209 1553 687 1168 1106 203
1643 1022 210 952 366 999 779 205 1673 610 1596 1054 206 1931 685 1904 1134 207 1207 697 1014 1113 209
1799 1030 210 2146 259 6199 642 208 2065 831 1436 1223 207 2136 909 1835 1782 208 1122 369 1071 663 208
1674 975 209 1158 338 2756 706 206 1910 707 1554 1085 205 1694 508 1928 1102 212 1115 399 1188 862 210
1742 1049 209 1010 367 1023 669 209 2046 815 1712 1375 205 2198 636 1803 978 209 1016 517 1111 946 209
2480 1315 205 2179 330 2545 615 208 1753 608 1746 1229 208 2976 684 2834 1113 208 1294 405 1625 999 209
2101 1202 210 1202 393 1246 692 208 2000 533 1955 1018 207 2852 768 1735 1110 208 1348 445 1365 1072 208
1530 1313 210 1094 535 1244 1055 206 1948 876 1894 1474 213 1759 435 2025 749 212 1163 379 1226 710 209
2673 862 207 1970 461 1925 762 205 2439 732 2459 1191 208 2931 573 3440 1102 213 1802 289 2212 637 211
1450 1468 203 988 290 1255 586 208 1223 561 1270 1494 210 1854 540 1721 807 208 1054 353 1195 733 208
1773 1194 209 934 217 1058 430 209 1226 736 1394 1626 209 2278 584 2904 1072 210 1197 394 1296 621 205
1539 1042 207 1073 268 1258 601 207 2076 890 1658 1585 200 1743 594 1522 937 210 1253 510 1555 916 212
1416 1477 202 1536 299 1638 640 205 3776 938 3660 1436 202 3275 806 2316 1010 201 1762 592 1478 910 204
4262 1449 210 4230 294 4214 639 207 4935 451 6597 868 211 4251 1123 3635 2220 205 2215 470 2905 870 208
2133 1562 200 1308 725 1101 1205 208 1898 583 1578 944 204 2224 1076 1848 1717 206 1487 584 1068 927 208
1797 932 209 1423 504 1396 796 210 1625 689 1444 1075 204 2112 923 1518 1556 208 1029 359 1188 745 207
1711 1153 198 1020 325 1140 639 207 1756 502 1598 1109 207 2091 807 1897 1239 208 1068 443 1177 1034 207
1715 1505 206 1087 358 1185 669 208 1852 839 1867 1459 209 1897 765 1823 1188 210 986 425 1077 840 212
1751 1245 205 869 194 1007 446 209 1811 748 1535 1378 209 2235 641 1673 966 204 1054 342 1129 773 207
1708 1192 201 992 462 1068 954 207 1865 764 1627 1387 212 2348 719 1628 937 204 868 359 981 666 207
1725 1165 209 1248 618 1133 1026 201 1580 509 1527 867 210 2729 898 1692 1341 200 969 334 972 747 208
1917 781 210 794 276 907 503 211 1958 772 1832 1255 207 1806 592 1591 1079 211 1161 678 1092 1403 207
1677 832 207 1254 444 1850 797 206 1337 457 1647 1001 207 2051 790 2014 1417 206 1169 457 1010 911 208
1572 1106 206 1013 462 1088 915 208 1216 469 1611 1003 211 1911 542 1780 805 206 1194 299 1487 586 208
1923 1067 208 1032 334 1127 733 210 1802 807 1881 1317 208 1823 854 1651 1564 210 1724 801 1252 1244 207
1900 1633 205 985 552 1113 1088 205 1553 496 1678 970 209 1923 572 1736 899 208 1789 622 1179 951 205
5045 1007 207 3532 615 4102 1343 209 4281 517 6043 1065 212 5893 786 5568 1258 212 3063 388 3522 701 208
1465 1238 198 1055 249 1096 614 204 1327 556 1533 1146 212 2092 1041 2152 1670 211 1491 435 1428 704 209
1269 1264 211 901 287 936 642 206 1347 508 1289 1046 208 2191 947 1704 1607 210 1434 774 1312 1661 209
2176 1432 207 1820 346 1912 689 208 2168 650 2941 1434 212 2681 907 3119 1398 210 1467 411 1688 759 210
2229 1253 211 1352 285 1395 807 207 2273 548 2151 853 209 2632 1067 2160 1482 207 1253 339 1296 1169 210
2710 1200 208 1138 373 1224 773 206 1666 468 1969 811 208 2097 786 2065 1339 210 1479 880 1419 2345 207
2552 1008 207 1292 311 1308 712 208 1884 649 1809 1146 211 2548 823 2075 1136 206 1155 650 1303 2266 207
1578 1442 209 1078 411 1959 660 209 1883 1001 1614 1512 202 1924 845 1862 1550 209 1173 361 1187 805 209
1244 1548 206 1380 318 1933 473 205 1638 613 1435 1090 207 1832 781 1555 1309 207 1067 589 975 878 207
1562 1624 209 1417 449 1606 715 203 2001 706 1463 1177 203 1713 624 1478 1171 212 1316 578 990 1002 205
1715 1151 208 1633 643 1588 1080 211 3181 867 2325 1206 199 2096 692 1888 1193 211 1368 689 1170 1236 210
1538 1623 202 1082 454 1066 878 208 2385 777 1531 1129 208 2355 833 1971 1219 204 1092 399 1387 688 208
1554 1669 212 1657 569 1148 1030 205 1228 586 1460 1355 210 2051 743 1176 1318 208 1070 370 1100 685 209
1703 839 206 1367 667 1075 1038 207 1350 533 1394 999 210 2200 630 1595 1067 206 1069 300 1263 596 211
1726 1284 209 1515 686 1027 1129 201 1836 497 1921 979 208 2150 609 1809 1133 209 881 391 1020 935 209
1616 1417 211 1243 592 1066 1078 206 1513 573 1585 1222 208 2157 881 1874 1333 204 1096 344 1111 676 209
1598 1413 207 1195 553 1089 1010 208 2181 1052 1809 1729 207 2137 857 1656 1235 206 1060 273 1226 636 209
1834 943 207 1180 559 975 1012 212 1955 828 1604 1610 202 1825 536 1915 803 208 1335 449 1343 896 210
1711 1502 206 1119 377 1278 746 208 2186 1067 1969 1947 206 1454 399 1466 909 208 1082 389 1329 919 211
2041 1299 212 1488 233 1641 440 207 2444 1230 2803 1995 208 2455 910 2012 1313 209 1322 437 1582 1000 212
3254 1656 209 1416 513 981 1025 206 2025 910 1831 1582 205 2580 805 1761 1043 197 1114 479 1316 830 209
1961 1706 208 902 337 1053 640 211 1827 549 1581 816 206 2030 773 1375 1191 206 4694 633 13046 1114 212
1732 808 211 1015 328 1127 676 210 1369 461 1345 793 211 2482 908 1620 1277 204 1065 489 1180 858 205
1399 981 208 1459 386 2397 743 211 1501 593 1521 1074 207 2196 740 1875 1025 206 1269 420 1228 802 206
1796 1104 209 941 792 1296 1520 209 1345 409 1455 898 210 2386 734 2127 1053 212 1245 381 1118 833 208
1607 1544 207 1775 325 1088 721 207 1350 697 1580 1432 208 1777 953 1591 1677 212 964 317 1031 735 210
6082 1360 211 6847 338 7367 652 205 6402 509 10461 914 209 6846 1063 7275 1655 209 2973 377 3992 614 205
2007 1284 212 1234 810 1038 1322 204 1324 543 1332 1104 207 5185 993 8911 1360 203 1149 536 1011 946 207
2180 1238 212 1483 198 1742 738 209 2280 849 1995 1316 206 2470 705 2124 1319 207 1331 362 1491 762 207
11011 1082 211 10548 296 12684 673 209 18085 860 17163 1499 207 15176 669 15184 1203 208 8003 538 13378 964 206
960 907 201 1077 328 1203 591 208 1339 527 1420 976 209 1670 390 1748 693 211 1231 419 1333 736 209
1676 1268 210 1045 468 1088 913 209 2108 965 1266 1403 201 2011 703 1732 1132 206 1149 396 1345 659 207
1995 1245 199 1082 406 1469 820 211 2166 694 1698 1113 200 2299 633 1895 905 207 1280 437 1157 742 209
1663 1301 203 1267 530 1349 885 205 1966 851 1798 1298 202 1850 983 1548 1929 210 1487 628 1326 957 203
3159 1353 203 1035 457 1102 895 207 2015 793 2118 1372 204 2325 1012 1681 1833 203 1915 780 1110 1251 195
1614 1154 210 1113 409 1286 1167 207 1638 798 1479 1365 205 1417 684 1485 1247 204 1076 335 1056 777 210
1713 738 211 1657 562 1344 872 207 1877 898 1783 1424 209 2021 963 1553 1541 208 1425 364 1468 636 206
1767 831 211 1339 574 1143 828 208 1337 451 1460 795 209 1927 626 2976 1010 210 1090 314 1270 803 209
1527 1235 203 898 234 947 445 207 1952 698 1395 1287 204 1997 554 1790 932 206 1130 401 964 667 207
1783 1645 207 1274 608 1329 1299 212 1390 634 1660 1267 209 2096 812 1591 1218 201 1351 640 1368 976 206
1610 1302 211 1119 481 1123 852 206 1864 689 1618 1092 207 1671 524 1870 931 210 1256 458 1061 790 205
1727 2534 206 1171 468 1230 1000 210 1675 554 1372 893 204 1900 569 1736 923 213 999 407 1132 929 210
1597 1164 207 1023 305 1133 622 207 1516 633 1407 1049 208 2235 768 1304 1130 202 1094 354 1136 747 210
1499 1399 207 1148 516 1128 995 205 2133 986 1461 1600 204 2239 754 2149 1246 207 1053 448 993 765 211
2039 933 205 1655 777 1355 1884 204 1590 482 1696 901 210 2172 706 1847 1146 204 1364 692 1202 1169 202
1731 505 210 1058 616 1353 1806 210 1656 438 1421 678 210 2517 944 1759 1569 211 1129 448 1354 818 211
1596 1090 206 1037 168 1360 376 211 1706 570 1519 1080 208 1869 638 2085 1412 212 1239 511 1398 924 209
1797 1276 204 1095 284 1218 488 212 2140 616 1762 881 209 1797 788 1651 1292 207 1203 508 1103 913 210
1700 1108 210 923 329 1139 591 209 2275 783 1916 1291 205 1318 537 1455 1074 210 1374 555 1184 887 207
1710 1458 208 878 339 1093 692 207 1978 745 1674 1285 208 1547 364 1690 898 209 940 388 956 777 212
1774 1509 212 981 512 1069 1032 209 2197 675 1701 1107 205 2041 758 2203 1305 206 1058 306 1208 542 209
2414 1416 205 1647 378 1904 886 209 2565 685 3442 1148 206 2616 748 2409 1248 206 1578 418 1646 676 208
8693 1571 210 9935 221 12626 462 207 5426 357 9637 894 208 9411 879 10557 1569 200 2381 503 2625 858 210
2001 803 208 976 287 1128 674 211 1579 509 1592 871 208 2489 836 2170 1163 207 1130 375 1189 645 208
1943 1132 205 1240 412 1410 896 204 2578 611 2561 984 205 2253 635 2289 1068 211 1347 456 1335 771 205
1892 1624 210 889 243 1079 500 208 1571 623 1549 1121 211 1422 534 1440 941 209 1091 448 1057 738 207
1758 1270 206 1052 356 1211 603 208 2161 763 1760 1250 205 2024 650 1613 1526 208 1061 305 1213 548 209
3935 1130 202 4044 415 5107 848 210 6129 657 7645 1006 206 3738 576 4514 1496 209 1462 401 1740 838 207
2415 1442 212 1795 427 2312 1386 207 2488 392 3459 837 209 2887 535 2694 701 205 1391 455 1224 763 207
2098 1483 202 1124 291 1357 717 208 1967 795 1826 2719 206 2917 945 2280 1560 203 1286 306 1300 511 210
1902 1334 205 1104 443 1027 852 207 2032 946 1952 2016 202 2653 955 1647 1454 201 1080 284 1231 518 209
1950 1205 200 1195 180 1341 591 206 1840 714 1529 1077 208 2141 917 1673 1523 209 1311 840 1048 1223 204
1873 1076 209 758 238 858 536 207 2162 534 2668 1024 204 1541 477 1622 1130 209 1022 290 1213 638 211
1802 1227 212 1223 528 1431 1030 206 1636 855 1402 1417 207 1778 548 1734 1058 211 954 450 1054 762 209
3546 961 207 2461 220 2676 502 208 5016 668 6555 1203 210 4340 688 4026 1047 205 1800 272 2365 574 206
1872 1035 210 1070 230 1435 490 210 1398 656 1510 1271 204 2185 742 1464 1177 209 1234 554 1295 1132 205
1604 1461 205 1449 321 2765 786 204 1609 579 1488 934 209 1744 724 1507 1447 209 914 220 908 427 208
1614 782 212 1415 528 1425 881 201 1924 701 1572 1196 209 2377 893 1553 1479 203 1328 467 1341 953 208
1497 1258 206 1148 491 2159 955 208 2021 820 1647 1140 206 2119 654 1812 1127 209 1032 284 1099 582 209

|       |      |     |       |     |       |      |     |       |      |       |      |     |        |      |       |      |     |      |     |       |      |     |
|-------|------|-----|-------|-----|-------|------|-----|-------|------|-------|------|-----|--------|------|-------|------|-----|------|-----|-------|------|-----|
| 1728  | 1255 | 211 | 1367  | 422 | 3494  | 825  | 210 | 1308  | 601  | 1452  | 1127 | 212 | 2071   | 920  | 1810  | 1372 | 209 | 978  | 409 | 1106  | 775  | 207 |
| 1497  | 1405 | 210 | 1781  | 558 | 2774  | 955  | 205 | 2129  | 930  | 1624  | 1378 | 208 | 1920   | 850  | 1573  | 1261 | 203 | 1190 | 615 | 1247  | 1137 | 212 |
| 1748  | 1426 | 205 | 883   | 700 | 991   | 1675 | 208 | 1984  | 962  | 1425  | 1454 | 207 | 2796   | 941  | 1578  | 1145 | 203 | 1034 | 445 | 1047  | 997  | 203 |
| 1662  | 1311 | 208 | 877   | 335 | 992   | 637  | 206 | 2190  | 551  | 1683  | 743  | 200 | 2259   | 743  | 1740  | 1102 | 205 | 1664 | 578 | 1231  | 759  | 208 |
| 1695  | 1617 | 208 | 918   | 351 | 999   | 757  | 206 | 1837  | 693  | 1473  | 1478 | 207 | 2136   | 799  | 1846  | 1779 | 210 | 1663 | 456 | 1385  | 753  | 210 |
| 1715  | 1180 | 209 | 903   | 662 | 1229  | 2462 | 209 | 1330  | 382  | 1567  | 1051 | 211 | 2785   | 1417 | 1964  | 2308 | 206 | 1294 | 546 | 1286  | 1037 | 211 |
| 2053  | 1058 | 210 | 898   | 298 | 998   | 771  | 208 | 1356  | 349  | 1555  | 850  | 212 | 2839   | 692  | 2133  | 1070 | 204 | 1764 | 442 | 1373  | 742  | 206 |
| 2016  | 1214 | 205 | 959   | 364 | 850   | 721  | 207 | 1378  | 514  | 1484  | 1029 | 209 | 2633   | 856  | 1898  | 1360 | 206 | 1324 | 567 | 1268  | 1036 | 210 |
| 6074  | 1151 | 211 | 4598  | 347 | 4929  | 749  | 206 | 4289  | 426  | 6480  | 965  | 213 | 5988   | 593  | 7173  | 1217 | 210 | 4723 | 488 | 6915  | 934  | 208 |
| 2220  | 1587 | 201 | 1498  | 497 | 1678  | 1029 | 209 | 2288  | 737  | 1894  | 1239 | 205 | 3012   | 749  | 2417  | 1160 | 205 | 1056 | 326 | 1162  | 743  | 210 |
| 1619  | 1405 | 210 | 984   | 457 | 1019  | 893  | 209 | 1846  | 749  | 1751  | 1314 | 210 | 2172   | 812  | 1652  | 1163 | 209 | 1027 | 336 | 1170  | 732  | 209 |
| 1414  | 734  | 209 | 988   | 332 | 1160  | 802  | 208 | 1877  | 773  | 1340  | 1575 | 203 | 2515   | 896  | 2107  | 1581 | 208 | 1134 | 492 | 1189  | 776  | 206 |
| 1609  | 1372 | 208 | 903   | 401 | 1150  | 828  | 209 | 1812  | 771  | 2005  | 1601 | 205 | 2019   | 559  | 1535  | 889  | 208 | 962  | 342 | 1058  | 712  | 210 |
| 1566  | 1095 | 198 | 844   | 272 | 996   | 677  | 208 | 2391  | 840  | 1508  | 1243 | 197 | 2988   | 1010 | 1929  | 1310 | 196 | 957  | 422 | 1106  | 919  | 210 |
| 17738 | 1358 | 205 | 9430  | 351 | 10301 | 744  | 207 | 15470 | 1059 | 18102 | 1818 | 205 | 14110  | 670  | 16801 | 1019 | 206 | 7236 | 374 | 10811 | 713  | 210 |
| 1702  | 1047 | 206 | 1132  | 345 | 1146  | 612  | 207 | 2936  | 888  | 2658  | 1549 | 204 | 1659   | 713  | 1610  | 1354 | 209 | 1125 | 382 | 1394  | 923  | 209 |
| 1485  | 1095 | 206 | 901   | 228 | 1307  | 451  | 204 | 2570  | 1126 | 1307  | 1501 | 205 | 1989   | 591  | 1832  | 1023 | 207 | 1045 | 465 | 1071  | 807  | 207 |
| 1923  | 1164 | 210 | 853   | 336 | 1179  | 892  | 210 | 2023  | 829  | 1468  | 1669 | 203 | 2066   | 707  | 1629  | 1198 | 208 | 1126 | 536 | 1356  | 1034 | 210 |
| 1541  | 988  | 207 | 1310  | 495 | 972   | 830  | 208 | 1683  | 645  | 1382  | 955  | 207 | 1569   | 426  | 1500  | 814  | 207 | 1507 | 582 | 1497  | 1060 | 207 |
| 1603  | 778  | 210 | 1020  | 339 | 1145  | 763  | 205 | 1485  | 703  | 1345  | 1127 | 208 | 1669   | 708  | 1344  | 1196 | 207 | 1035 | 529 | 1157  | 938  | 209 |
| 2067  | 1055 | 206 | 1108  | 413 | 1989  | 1062 | 212 | 1833  | 866  | 1419  | 1327 | 199 | 2312   | 922  | 1951  | 1493 | 208 | 1320 | 640 | 1083  | 965  | 201 |
| 1657  | 1208 | 199 | 1189  | 267 | 2270  | 535  | 209 | 2273  | 1203 | 1958  | 1569 | 199 | 1717   | 578  | 1586  | 945  | 209 | 1260 | 386 | 1304  | 678  | 209 |
| 1653  | 1123 | 202 | 1323  | 541 | 2446  | 854  | 206 | 1322  | 846  | 1422  | 1432 | 208 | 1911   | 832  | 1607  | 1482 | 210 | 1197 | 321 | 1727  | 674  | 207 |
| 1708  | 768  | 204 | 923   | 223 | 1056  | 455  | 207 | 1329  | 537  | 1546  | 962  | 207 | 1745   | 791  | 1396  | 1398 | 207 | 1424 | 381 | 1293  | 579  | 204 |
| 1473  | 1251 | 207 | 1682  | 396 | 4882  | 778  | 212 | 1783  | 632  | 1880  | 1295 | 209 | 1929   | 679  | 1829  | 1116 | 212 | 1331 | 638 | 1205  | 1336 | 207 |
| 1616  | 765  | 207 | 1120  | 318 | 2203  | 717  | 209 | 2015  | 967  | 1518  | 1591 | 206 | 1810   | 583  | 1573  | 995  | 204 | 917  | 688 | 1000  | 1441 | 204 |
| 1738  | 1012 | 207 | 1593  | 256 | 4420  | 590  | 204 | 2180  | 949  | 1709  | 1450 | 203 | 1954   | 824  | 1850  | 1447 | 211 | 1505 | 587 | 1129  | 1070 | 206 |
| 3491  | 1060 | 204 | 2627  | 597 | 2895  | 992  | 209 | 3435  | 582  | 4336  | 1034 | 208 | 3372   | 692  | 4813  | 1236 | 209 | 1626 | 614 | 1498  | 959  | 210 |
| 15523 | 966  | 212 | 18594 | 253 | 20069 | 580  | 206 | 17852 | 573  | 19791 | 893  | 206 | 16496  | 693  | 19075 | 1193 | 208 | 7195 | 461 | 11063 | 726  | 210 |
| 2738  | 1144 | 212 | 1630  | 242 | 1799  | 492  | 206 | 3544  | 643  | 4924  | 1136 | 211 | 2585   | 958  | 2441  | 1599 | 207 | 1667 | 829 | 2065  | 1172 | 210 |
| 3309  | 1146 | 209 | 2512  | 226 | 2771  | 595  | 205 | 5542  | 605  | 7991  | 957  | 210 | 3084   | 780  | 3190  | 1390 | 210 | 2153 | 540 | 2826  | 1045 | 209 |
| 1572  | 1260 | 206 | 933   | 174 | 1185  | 340  | 208 | 1944  | 752  | 1699  | 1247 | 206 | 1574   | 455  | 1758  | 902  | 211 | 1370 | 595 | 1103  | 1033 | 209 |
| 1705  | 2157 | 208 | 903   | 178 | 1188  | 500  | 207 | 1896  | 701  | 1353  | 1022 | 206 | 1620   | 696  | 1828  | 1418 | 210 | 1595 | 589 | 1388  | 808  | 205 |
| 1650  | 1280 | 205 | 837   | 354 | 942   | 893  | 208 | 2221  | 863  | 1432  | 1520 | 202 | 1796   | 532  | 1570  | 937  | 206 | 1055 | 404 | 1065  | 670  | 209 |
| 1558  | 1221 | 207 | 1045  | 327 | 1620  | 664  | 210 | 2575  | 1107 | 1629  | 1834 | 209 | 2985   | 635  | 5858  | 1101 | 211 | 1058 | 392 | 1024  | 681  | 211 |
| 1601  | 1134 | 209 | 863   | 315 | 943   | 731  | 207 | 1866  | 571  | 1912  | 952  | 210 | 2168   | 1064 | 1795  | 1752 | 212 | 1207 | 441 | 1181  | 710  | 207 |
| 1344  | 1331 | 205 | 889   | 291 | 1171  | 614  | 206 | 1418  | 512  | 1611  | 1032 | 209 | 1845   | 918  | 1675  | 1555 | 208 | 1022 | 368 | 1005  | 642  | 211 |
| 1660  | 1471 | 209 | 747   | 332 | 873   | 705  | 210 | 1829  | 902  | 1348  | 1651 | 209 | 2251   | 963  | 1675  | 1483 | 207 | 1277 | 479 | 1195  | 765  | 209 |
| 1887  | 1034 | 207 | 961   | 286 | 1436  | 540  | 208 | 1691  | 872  | 1459  | 1588 | 209 | 1829   | 511  | 1695  | 1074 | 209 | 1188 | 398 | 1179  | 703  | 206 |
| 1304  | 1520 | 201 | 947   | 407 | 1421  | 727  | 209 | 1915  | 890  | 1648  | 1959 | 205 | 2343   | 840  | 1904  | 1211 | 206 | 1337 | 566 | 1308  | 1571 | 211 |
| 1590  | 1380 | 210 | 917   | 437 | 1035  | 777  | 208 | 1330  | 564  | 1223  | 1081 | 210 | 1764   | 904  | 1647  | 1515 | 210 | 1192 | 307 | 1042  | 487  | 212 |
| 1623  | 1176 | 204 | 623   | 300 | 660   | 564  | 208 | 1325  | 300  | 1503  | 587  | 211 | 1971   | 863  | 1670  | 1496 | 206 | 1782 | 589 | 1394  | 871  | 203 |
| 1681  | 930  | 205 | 868   | 199 | 1063  | 427  | 211 | 1797  | 628  | 1532  | 992  | 207 | 1527   | 602  | 1573  | 1312 | 208 | 1582 | 591 | 1932  | 1006 | 209 |
| 1510  | 1327 | 207 | 1155  | 390 | 2009  | 739  | 204 | 2200  | 729  | 1491  | 1138 | 204 | 1712   | 568  | 1712  | 1091 | 207 | 1462 | 699 | 1328  | 1175 | 210 |
| 9844  | 879  | 208 | 7196  | 346 | 10633 | 797  | 204 | 9155  | 773  | 14347 | 1427 | 207 | 9313   | 769  | 13684 | 1447 | 208 | 4558 | 372 | 8444  | 784  | 211 |
| 1793  | 1090 | 205 | 1151  | 467 | 1514  | 847  | 209 | 1662  | 685  | 1653  | 1365 | 210 | 2075   | 860  | 1741  | 1429 | 206 | 1082 | 428 | 1278  | 1616 | 210 |
| 1528  | 1362 | 205 | 1171  | 405 | 1638  | 682  | 208 | 1443  | 749  | 1576  | 1354 | 210 | 1706   | 613  | 1611  | 1133 | 212 | 973  | 302 | 1179  | 724  | 210 |
| 1324  | 1295 | 210 | 1026  | 291 | 1283  | 575  | 206 | 1637  | 777  | 1562  | 1268 | 206 | 2337   | 833  | 1779  | 1133 | 201 | 1243 | 513 | 1349  | 1050 | 207 |
| 1833  | 1571 | 208 | 1117  | 398 | 1444  | 677  | 208 | 1927  | 675  | 1795  | 1140 | 209 | 1753   | 561  | 1485  | 961  | 206 | 1034 | 433 | 1305  | 1205 | 209 |
| 1480  | 770  | 206 | 959   | 338 | 1075  | 624  | 207 | 2250  | 801  | 1476  | 1155 | 206 | 2137   | 474  | 2085  | 811  | 208 | 1391 | 566 | 1164  | 979  | 207 |
| 1526  | 1167 | 209 | 1003  | 227 | 1531  | 515  | 209 | 3908  | 565  | 8979  | 1029 | 211 | 2124   | 873  | 1562  | 1240 | 206 | 952  | 377 | 1105  | 769  | 205 |
| 1959  | 964  | 210 | 1327  | 407 | 1370  | 729  | 210 | 2657  | 759  | 2315  | 1018 | 207 | 2513   | 652  | 2264  | 1086 | 207 | 1040 | 267 | 1113  | 651  | 208 |
| 1553  | 1874 | 212 | 855   | 285 | 1045  | 660  | 210 | 1603  | 588  | 1487  | 923  | 208 | 1735   | 587  | 1570  | 1031 | 209 | 1185 | 379 | 1300  | 699  | 211 |
| 3431  | 1374 | 206 | 1990  | 253 | 2053  | 452  | 208 | 2925  | 880  | 3399  | 2310 | 210 | 3358   | 638  | 4639  | 1500 | 212 | 2108 | 407 | 3190  | 724  | 210 |
| 1752  | 1170 | 207 | 897   | 247 | 1329  | 532  | 209 | 1661  | 514  | 1657  | 905  | 209 | 1950   | 624  | 1748  | 1151 | 210 | 1250 | 413 | 1243  | 629  | 210 |
| 3311  | 1427 | 208 | 2143  | 503 | 2573  | 1608 | 205 | 2801  | 582  | 3075  | 962  | 207 | 3205   | 782  | 4381  | 1420 | 211 | 2232 | 407 | 2998  | 755  | 211 |
| 9502  | 1226 | 209 | 6677  | 307 | 8434  | 649  | 207 | 7965  | 603  | 14026 | 1011 | 207 | 7342   | 850  | 12854 | 1282 | 205 | 3802 | 516 | 7670  | 772  | 208 |
| 1526  | 1611 | 200 | 948   | 297 | 1165  | 728  | 210 | 1558  | 585  | 1739  | 926  | 210 | 1870   | 601  | 1694  | 1239 | 210 | 1803 | 705 | 1582  | 961  | 203 |
| 1796  | 1833 | 209 | 1029  | 398 | 1295  | 967  | 206 | 2110  | 998  | 1493  | 1725 | 207 | 1888   | 622  | 1709  | 1228 | 211 | 1105 | 599 | 1060  | 944  | 211 |
| 1514  | 1333 | 208 | 790   | 340 | 799   | 896  | 208 | 1740  | 621  | 1610  | 988  | 205 | 2297   | 936  | 1694  | 1641 | 208 | 939  | 366 | 1079  | 847  | 208 |
| 1286  | 2027 | 195 | 964   | 415 | 1159  | 983  | 205 | 1504  | 512  | 1650  | 879  | 211 | 1895   | 889  | 1710  | 1755 | 207 | 1520 | 431 | 1425  | 822  | 210 |
| 1694  | 2013 | 209 | 958   | 216 | 1335  | 532  | 207 | 1746  | 953  | 1585  | 1666 | 209 | 1844</ |      |       |      |     |      |     |       |      |     |

|       |      |     |       |      |       |      |     |       |      |       |      |     |       |      |       |      |     |      |     |       |      |     |
|-------|------|-----|-------|------|-------|------|-----|-------|------|-------|------|-----|-------|------|-------|------|-----|------|-----|-------|------|-----|
| 1792  | 1208 | 210 | 1488  | 335  | 3907  | 666  | 208 | 1906  | 927  | 2049  | 1615 | 208 | 1873  | 552  | 1926  | 1123 | 213 | 1394 | 488 | 1232  | 799  | 208 |
| 1837  | 1220 | 212 | 1127  | 569  | 1104  | 937  | 202 | 3184  | 1024 | 1762  | 1230 | 200 | 2106  | 606  | 2102  | 1279 | 209 | 1596 | 715 | 1185  | 1028 | 201 |
| 1952  | 1826 | 195 | 1045  | 446  | 868   | 804  | 207 | 2415  | 887  | 1422  | 1222 | 202 | 1754  | 618  | 1645  | 1364 | 209 | 1431 | 565 | 1196  | 860  | 208 |
| 2499  | 1406 | 207 | 2428  | 298  | 2945  | 610  | 210 | 1743  | 690  | 1837  | 1244 | 206 | 2680  | 849  | 2593  | 1341 | 211 | 1124 | 456 | 1094  | 860  | 209 |
| 2045  | 850  | 208 | 1021  | 303  | 1037  | 504  | 212 | 2152  | 714  | 2004  | 1130 | 207 | 2220  | 708  | 2307  | 1644 | 211 | 1048 | 308 | 1100  | 599  | 210 |
| 1749  | 850  | 208 | 1250  | 525  | 1002  | 760  | 204 | 1255  | 537  | 1358  | 1058 | 213 | 1714  | 537  | 1677  | 1073 | 212 | 1436 | 423 | 1451  | 780  | 206 |
| 2428  | 1125 | 208 | 1867  | 495  | 1797  | 870  | 204 | 2279  | 824  | 2018  | 1378 | 206 | 3008  | 563  | 3131  | 979  | 212 | 1675 | 374 | 1794  | 700  | 207 |
| 2380  | 1366 | 203 | 997   | 257  | 1137  | 507  | 209 | 2089  | 972  | 1903  | 1686 | 206 | 1495  | 509  | 1601  | 1067 | 213 | 862  | 396 | 945   | 768  | 212 |
| 2143  | 1148 | 207 | 1007  | 402  | 1062  | 1084 | 211 | 1498  | 628  | 1372  | 1070 | 212 | 1993  | 670  | 1626  | 1232 | 207 | 1160 | 423 | 1113  | 843  | 209 |
| 1737  | 1122 | 194 | 956   | 334  | 1086  | 701  | 209 | 1170  | 713  | 1264  | 1445 | 209 | 1633  | 524  | 1608  | 1039 | 206 | 932  | 381 | 976   | 715  | 207 |
| 2160  | 1202 | 209 | 1992  | 517  | 1984  | 1257 | 207 | 2651  | 697  | 2613  | 1248 | 210 | 1817  | 626  | 1766  | 1593 | 210 | 1081 | 219 | 1192  | 472  | 206 |
| 7222  | 1057 | 203 | 3775  | 475  | 5342  | 1065 | 210 | 5542  | 727  | 6755  | 1169 | 210 | 5352  | 886  | 4944  | 2124 | 207 | 2676 | 560 | 3453  | 996  | 209 |
| 1782  | 1170 | 210 | 1059  | 338  | 1225  | 1009 | 209 | 1559  | 699  | 1585  | 1244 | 208 | 1333  | 374  | 1457  | 832  | 209 | 906  | 442 | 926   | 993  | 207 |
| 1852  | 1038 | 213 | 1041  | 528  | 1053  | 1008 | 211 | 1381  | 568  | 1378  | 1060 | 204 | 2101  | 674  | 1878  | 1736 | 209 | 1074 | 459 | 1047  | 797  | 209 |
| 1771  | 1683 | 206 | 1013  | 513  | 1097  | 914  | 209 | 1275  | 661  | 1442  | 1664 | 208 | 1681  | 622  | 1613  | 1664 | 210 | 1448 | 820 | 1182  | 1470 | 209 |
| 1562  | 1010 | 207 | 1081  | 331  | 1326  | 926  | 212 | 1482  | 670  | 1431  | 1148 | 210 | 2158  | 703  | 1745  | 1185 | 209 | 939  | 491 | 1162  | 1107 | 213 |
| 1692  | 846  | 210 | 1071  | 480  | 1053  | 908  | 209 | 1474  | 678  | 1416  | 1109 | 207 | 1992  | 707  | 1860  | 1006 | 207 | 1007 | 496 | 1093  | 943  | 206 |
| 1861  | 1038 | 206 | 1236  | 449  | 1234  | 844  | 202 | 1736  | 845  | 1965  | 1713 | 208 | 1833  | 724  | 1549  | 1185 | 208 | 1073 | 516 | 1198  | 1008 | 210 |
| 2055  | 1591 | 207 | 922   | 464  | 983   | 1039 | 209 | 1357  | 527  | 1606  | 1275 | 209 | 1615  | 506  | 1626  | 979  | 210 | 1020 | 490 | 843   | 845  | 208 |
| 1750  | 1442 | 207 | 1167  | 495  | 1340  | 841  | 212 | 1596  | 501  | 1388  | 794  | 205 | 1620  | 500  | 1675  | 1060 | 210 | 972  | 287 | 1100  | 644  | 206 |
| 1764  | 675  | 211 | 1264  | 520  | 1084  | 928  | 204 | 2498  | 743  | 1389  | 1274 | 207 | 2044  | 841  | 1904  | 1225 | 207 | 1129 | 371 | 1206  | 769  | 209 |
| 2060  | 1268 | 209 | 1336  | 523  | 1406  | 996  | 201 | 1258  | 496  | 1216  | 880  | 208 | 1530  | 408  | 1573  | 929  | 210 | 998  | 487 | 1181  | 924  | 206 |
| 1716  | 1202 | 211 | 1046  | 391  | 1082  | 644  | 204 | 1391  | 617  | 1418  | 1216 | 209 | 1900  | 775  | 1739  | 1458 | 206 | 968  | 461 | 980   | 1082 | 208 |
| 1672  | 1131 | 209 | 967   | 258  | 1096  | 754  | 204 | 1266  | 648  | 1861  | 1636 | 211 | 2832  | 669  | 3402  | 1349 | 210 | 1172 | 628 | 1260  | 1179 | 208 |
| 5142  | 1220 | 209 | 3382  | 548  | 3665  | 767  | 206 | 4471  | 760  | 5988  | 1569 | 210 | 5272  | 610  | 5695  | 1010 | 213 | 4099 | 560 | 4983  | 864  | 204 |
| 1604  | 863  | 206 | 1132  | 416  | 1138  | 881  | 205 | 1942  | 896  | 1395  | 1373 | 206 | 2865  | 878  | 1962  | 1477 | 203 | 1205 | 389 | 1487  | 856  | 207 |
| 1778  | 1201 | 209 | 924   | 311  | 1195  | 663  | 207 | 1529  | 623  | 1492  | 1043 | 209 | 1805  | 650  | 1731  | 1247 | 209 | 1039 | 423 | 1168  | 850  | 209 |
| 3977  | 1395 | 208 | 2325  | 374  | 2656  | 699  | 209 | 2365  | 632  | 2606  | 1044 | 210 | 2619  | 1120 | 2207  | 1801 | 205 | 1451 | 326 | 1581  | 586  | 213 |
| 1901  | 1238 | 209 | 1437  | 444  | 1312  | 826  | 203 | 1947  | 682  | 2082  | 1381 | 212 | 2502  | 807  | 2410  | 1536 | 209 | 1179 | 293 | 1375  | 771  | 210 |
| 2622  | 1051 | 211 | 1482  | 575  | 1367  | 864  | 206 | 1612  | 626  | 1671  | 1313 | 210 | 2812  | 957  | 2111  | 1547 | 210 | 1958 | 821 | 1538  | 1768 | 205 |
| 2021  | 1159 | 209 | 1105  | 263  | 1149  | 540  | 209 | 2359  | 1056 | 1782  | 1672 | 208 | 2114  | 823  | 2115  | 1478 | 208 | 1424 | 326 | 1719  | 614  | 209 |
| 1656  | 1142 | 199 | 904   | 259  | 976   | 516  | 207 | 1879  | 691  | 1534  | 1155 | 210 | 2103  | 891  | 1830  | 1319 | 208 | 958  | 289 | 954   | 623  | 209 |
| 2136  | 1394 | 202 | 1143  | 517  | 1260  | 1150 | 209 | 1713  | 619  | 1561  | 1173 | 211 | 1483  | 514  | 1384  | 1037 | 211 | 1142 | 374 | 1099  | 681  | 207 |
| 1626  | 908  | 208 | 1066  | 473  | 1497  | 1070 | 209 | 2045  | 795  | 1882  | 1387 | 209 | 1919  | 374  | 1859  | 728  | 213 | 962  | 376 | 1103  | 730  | 209 |
| 1914  | 927  | 208 | 1081  | 675  | 1432  | 1089 | 203 | 2046  | 961  | 1980  | 1697 | 210 | 2005  | 501  | 1852  | 1018 | 211 | 1086 | 363 | 1270  | 770  | 209 |
| 1648  | 1931 | 208 | 1132  | 275  | 1339  | 656  | 208 | 2311  | 963  | 1727  | 1448 | 208 | 1748  | 572  | 1566  | 959  | 210 | 1208 | 433 | 1167  | 803  | 207 |
| 1765  | 1358 | 207 | 1016  | 356  | 1091  | 932  | 210 | 1349  | 538  | 1507  | 912  | 211 | 1541  | 549  | 1496  | 1125 | 210 | 1243 | 536 | 1081  | 951  | 207 |
| 1734  | 1509 | 211 | 1205  | 533  | 1059  | 903  | 207 | 2002  | 900  | 1381  | 1459 | 205 | 2007  | 754  | 1672  | 1581 | 209 | 1420 | 560 | 1337  | 941  | 206 |
| 1789  | 1222 | 209 | 1117  | 457  | 1062  | 839  | 208 | 2475  | 973  | 1557  | 1821 | 206 | 3022  | 1223 | 2100  | 1959 | 207 | 1406 | 462 | 1270  | 729  | 207 |
| 1920  | 1045 | 204 | 1029  | 388  | 1312  | 724  | 208 | 1764  | 644  | 1770  | 1123 | 212 | 2214  | 951  | 1412  | 1470 | 209 | 1170 | 504 | 930   | 967  | 208 |
| 1508  | 1272 | 209 | 1081  | 271  | 1631  | 583  | 207 | 2181  | 956  | 1546  | 1381 | 206 | 1964  | 834  | 1575  | 1279 | 203 | 1162 | 541 | 1101  | 939  | 206 |
| 2098  | 1364 | 210 | 979   | 329  | 1263  | 595  | 209 | 1458  | 940  | 1388  | 1045 | 209 | 1669  | 861  | 1833  | 1356 | 207 | 1868 | 717 | 1053  | 1038 | 199 |
| 1720  | 1085 | 206 | 985   | 443  | 1018  | 1033 | 206 | 2529  | 925  | 1384  | 1449 | 203 | 1459  | 546  | 1596  | 1416 | 210 | 985  | 541 | 1075  | 1270 | 210 |
| 2423  | 1242 | 206 | 1618  | 227  | 1881  | 483  | 208 | 1862  | 634  | 1919  | 1149 | 211 | 2302  | 627  | 2063  | 1086 | 210 | 1189 | 318 | 1376  | 705  | 209 |
| 1787  | 1236 | 207 | 1107  | 283  | 1268  | 618  | 210 | 1314  | 714  | 1413  | 1259 | 212 | 2143  | 803  | 1837  | 1308 | 210 | 1254 | 543 | 1240  | 902  | 212 |
| 1649  | 1368 | 212 | 1054  | 341  | 1056  | 701  | 210 | 2123  | 908  | 1457  | 1265 | 201 | 1654  | 586  | 1715  | 1083 | 212 | 1667 | 463 | 4221  | 783  | 209 |
| 2014  | 1146 | 209 | 967   | 310  | 1080  | 582  | 208 | 1473  | 602  | 1850  | 1087 | 209 | 1875  | 903  | 1655  | 1464 | 208 | 1029 | 239 | 1130  | 492  | 208 |
| 1641  | 1541 | 207 | 935   | 365  | 1007  | 828  | 208 | 2152  | 885  | 1071  | 1238 | 202 | 1755  | 485  | 1747  | 862  | 210 | 925  | 265 | 995   | 651  | 209 |
| 2211  | 1134 | 211 | 3968  | 4013 | 2583  | 7123 | 195 | 1392  | 480  | 1583  | 1080 | 210 | 2754  | 843  | 2022  | 1529 | 208 | 1421 | 503 | 1686  | 877  | 210 |
| 1916  | 903  | 209 | 1450  | 1815 | 1023  | 4076 | 199 | 1305  | 717  | 1446  | 1299 | 210 | 2297  | 692  | 1871  | 1054 | 210 | 968  | 395 | 988   | 639  | 211 |
| 6416  | 1205 | 213 | 6566  | 443  | 8959  | 892  | 207 | 6492  | 797  | 10401 | 1555 | 212 | 7666  | 1392 | 7987  | 2030 | 206 | 3161 | 526 | 3987  | 1001 | 213 |
| 1689  | 1192 | 211 | 1059  | 509  | 1420  | 1030 | 209 | 1914  | 655  | 1650  | 1145 | 207 | 1964  | 702  | 2166  | 1351 | 211 | 1069 | 510 | 1037  | 974  | 207 |
| 2249  | 932  | 213 | 1494  | 338  | 1871  | 659  | 211 | 1676  | 612  | 2122  | 1335 | 212 | 2205  | 612  | 2215  | 1056 | 207 | 1171 | 205 | 1234  | 436  | 211 |
| 12428 | 810  | 212 | 11177 | 459  | 15515 | 948  | 210 | 12742 | 747  | 17578 | 1507 | 212 | 14198 | 659  | 15843 | 1106 | 210 | 8057 | 365 | 12063 | 733  | 212 |
| 2197  | 1287 | 208 | 1417  | 488  | 1619  | 885  | 209 | 1921  | 869  | 2393  | 1428 | 208 | 1690  | 641  | 1488  | 1104 | 210 | 1136 | 395 | 1357  | 631  | 207 |
| 1926  | 1545 | 209 | 1048  | 389  | 1118  | 990  | 210 | 1993  | 1083 | 1358  | 1726 | 207 | 2759  | 876  | 1751  | 1270 | 204 | 1734 | 629 | 992   | 1021 | 204 |
| 1918  | 1224 | 209 | 1107  | 507  | 1073  | 925  | 207 | 2078  | 921  | 1628  | 1327 | 209 | 1954  | 459  | 1915  | 696  | 210 | 1615 | 504 | 1166  | 834  | 205 |
| 1805  | 1119 | 209 | 1892  | 792  | 1156  | 1091 | 201 | 2090  | 607  | 2445  | 1054 | 207 | 1628  | 598  | 1720  | 1046 | 208 | 1040 | 376 | 1012  | 714  | 207 |
| 1548  | 1185 | 207 | 1800  | 733  | 1609  | 1219 | 207 | 1401  | 666  | 1484  | 1237 | 210 | 1995  | 741  | 1593  | 1277 | 208 | 1139 | 385 | 1148  | 626  | 210 |
| 1637  | 1229 | 210 | 1135  | 371  | 1104  | 740  | 206 | 2013  | 743  | 1719  | 1100 | 202 | 1879  | 543  | 1610  | 953  | 206 | 972  | 293 | 1054  | 628  | 209 |
| 1801  | 1909 | 208 | 1165  | 378  | 1207  | 713  | 210 | 1827  | 580  | 1738  | 971  | 207 | 2870  | 956  | 1427  | 1253 | 200 | 1116 | 455 | 898   | 779  | 209 |
| 1921  | 1603 | 208 | 1024  | 455  | 1086  | 933  | 208 | 1730  | 621  | 1561  | 1270 |     |       |      |       |      |     |      |     |       |      |     |
